# Supplementary material for: Mapping boron catalysis onto a phosphorus cluster platform
Source: Royal Society of Chemistry journal article supplement (doi:10.1039/d2dt03657f), 2022-01-01
Supplement: d2dt03657f1.pdf [file d2dt03657f1.pdf]

## Table of Contents

|                                                                                                                              |    |
|------------------------------------------------------------------------------------------------------------------------------|----|
| <b>1. Methods &amp; Materials</b> .....                                                                                      | 4  |
| <b>1.1. Experimental Considerations</b> .....                                                                                | 4  |
| <b>1.2. Analytical Considerations</b> .....                                                                                  | 4  |
| <b>1.3. Single Crystal X-ray Diffraction Considerations</b> .....                                                            | 5  |
| <b>1.4. Computational Considerations</b> .....                                                                               | 6  |
| <b>2. Synthesis</b> .....                                                                                                    | 7  |
| <b>2.1. Synthesis of (CH<sub>2</sub>CHSiMe<sub>2</sub>)<sub>3</sub>P<sub>7</sub> (1)</b> .....                               | 7  |
| <b>2.2. Synthesis of ({9-BBN}CH<sub>2</sub>CH<sub>2</sub>SiMe<sub>2</sub>)<sub>3</sub>P<sub>7</sub> (2)</b> .....            | 10 |
| <b>2.3. Synthesis of ClSiMe<sub>2</sub>CH<sub>2</sub>CH<sub>2</sub>(9-BBN) (3)</b> .....                                     | 14 |
| <b>2.4. Solution Stability of ({9-BBN}CH<sub>2</sub>CH<sub>2</sub>SiMe<sub>2</sub>)<sub>3</sub>(P<sub>7</sub>) (2)</b> ..... | 15 |
| <b>3. Lewis Acidity Examination</b> .....                                                                                    | 19 |
| <b>3.1. Gutmann-Beckett Test of 2 and 3</b> .....                                                                            | 19 |
| <b>3.2. Fluoride Ion Affinity (FIA)</b> .....                                                                                | 20 |
| <b>4. General Procedure for Hydroboration</b> .....                                                                          | 22 |
| <b>5. Screening Catalytic Conditions</b> .....                                                                               | 23 |
| <b>5.1. Temperature and Solvent Screening</b> .....                                                                          | 23 |
| <b>5.2. HB(pin) equivalents</b> .....                                                                                        | 24 |
| <b>5.3. Role of the Cluster in Catalysis</b> .....                                                                           | 26 |
| <b>6. Characterization Data</b> .....                                                                                        | 29 |
| <b>6.1. Carbodiimides</b> .....                                                                                              | 29 |
| 6.1.1. <b>4b</b> – N,N'-diisopropyl-N-(4,4,5,5-tetramethyl-1,3,2-dioxaborolan-2-yl)formimidamide.....                        | 29 |
| 6.1.2. <b>10b</b> – N,N'-dicyclohexyl-N-(4,4,5,5-tetramethyl-1,3,2-dioxaborolan-2-yl)formimidamide.....                      | 31 |
| 6.1.3. <b>11b</b> – N,N'-di-tert-butyl-N-(4,4,5,5-tetramethyl-1,3,2-dioxaborolan-2-yl)formimidamide.....                     | 32 |
| 6.1.4. <b>12b</b> – N'-tert-butyl-N-ethyl-N-(4,4,5,5-tetramethyl-1,3,2-dioxaborolan-2-yl)formimidamide.....                  | 34 |
| 6.1.5. <b>13b</b> – N-(4,4,5,5-tetramethyl-1,3,2-dioxaborolan-2-yl)-N,N'-bis(trimethylsilyl)formimidamide.....               | 36 |
| 6.1.6. <b>14b</b> – N,N'-bis(2,6-diisopropylphenyl)-N-(4,4,5,5-tetramethyl-1,3,2-dioxaborolan-2-yl)formimidamide .....       | 37 |
| <b>6.2. Isocyanates</b> .....                                                                                                | 39 |
| 6.2.1. <b>5b</b> - N-phenyl-N-(4,4,5,5-tetramethyl-1,3,2-dioxaborolan-2-yl)formamide .....                                   | 39 |
| 6.2.2. <b>15b</b> – N-(4,4,5,5-tetramethyl-1,3,2-dioxaborolan-2-yl)-N-(p-tolyl)formamide ...                                 | 40 |
| 6.2.3. <b>16b</b> - N-(4,4,5,5-tetramethyl-1,3,2-dioxaborolan-2-yl)-N-(4-(trifluoromethyl)phenyl)formamide.....              | 42 |
| 6.2.4. <b>17b</b> – N-(4-fluorophenyl)-N-(4,4,5,5-tetramethyl-1,3,2-dioxaborolan-2-yl)formamide.....                         | 44 |

|             |                                                                                                                                       |    |
|-------------|---------------------------------------------------------------------------------------------------------------------------------------|----|
| 6.2.5.      | <b>18b</b> – N-(4-bromophenyl)-N-(4,4,5,5-tetramethyl-1,3,2-dioxaborolan-2-yl)formamide.....                                          | 46 |
| 6.2.6.      | <b>19b</b> – N-cyclohexyl-N-(4,4,5,5-tetramethyl-1,3,2-dioxaborolan-2-yl)formamide<br>47                                              |    |
| 6.2.7.      | <b>20b</b> – N-tert-butyl-N-(4,4,5,5-tetramethyl-1,3,2-dioxaborolan-2-yl)formamide.                                                   | 48 |
| 6.2.8.      | <b>21b</b> – N-benzyl-N-(4,4,5,5-tetramethyl-1,3,2-dioxaborolan-2-yl)formamide.....                                                   | 50 |
| <b>6.3.</b> | <b>Ketones</b> .....                                                                                                                  | 51 |
| 6.3.1.      | <b>6b</b> – 4,4,5,5-tetramethyl-2-(1-phenylethoxy)-1,3,2-dioxaborolane .....                                                          | 51 |
| 6.3.2.      | <b>22b</b> – 2-(benzhydryloxy)-4,4,5,5-tetramethyl-1,3,2-dioxaborolane .....                                                          | 53 |
| 6.3.3.      | <b>23b</b> – 2-(phenyl((4,4,5,5-tetramethyl-1,3,2-dioxaborolan-2-yl)oxy)methyl)pyridine.....                                          | 54 |
| 6.3.4.      | <b>24b</b> – 4,4,5,5-tetramethyl-2-(1-(thiophen-2-yl)ethoxy)-1,3,2-dioxaborolane ....                                                 | 55 |
| 6.3.5.      | <b>25b</b> – 4,4,5,5-tetramethyl-2-(1-(perfluorophenyl)ethoxy)-1,3,2-dioxaborolane                                                    | 57 |
| 6.3.6.      | <b>26b</b> - trimethyl(1-((4,4,5,5-tetramethyl-1,3,2-dioxaborolan-2-yl)oxy)ethyl)silane<br>58                                         |    |
| <b>6.4.</b> | <b>Alkenes</b> .....                                                                                                                  | 60 |
| 6.4.1.      | <b>7b</b> – 4,4,5,5-tetramethyl-2-phenethyl-1,3,2-dioxaborolane.....                                                                  | 60 |
| 6.4.2.      | <b>27b</b> - 2-(4-bromophenethyl)-4,4,5,5-tetramethyl-1,3,2-dioxaborolane.....                                                        | 61 |
| 6.4.3.      | <b>28b</b> – 2-(4-methoxyphenethyl)-4,4,5,5-tetramethyl-1,3,2-dioxaborolane .....                                                     | 63 |
| 6.4.4.      | <b>29b</b> – 4,4,5,5-tetramethyl-2-(2-(naphthalen-2-yl)ethyl)-1,3,2-dioxaborolane ...                                                 | 64 |
| 6.4.5.      | <b>30b</b> – 2-(2-(4,4,5,5-tetramethyl-1,3,2-dioxaborolan-2-yl)ethyl)pyridine .....                                                   | 65 |
| 6.4.6.      | <b>31b</b> – 9-(2-(4,4,5,5-tetramethyl-1,3,2-dioxaborolan-2-yl)ethyl)-9H-carbazole..                                                  | 67 |
| <b>6.5.</b> | <b>Alkynes</b> .....                                                                                                                  | 68 |
| 6.5.1.      | <b>8b</b> – (E)-4,4,5,5-tetramethyl-2-styryl-1,3,2-dioxaborolane .....                                                                | 68 |
| 6.5.2.      | <b>32b</b> – (E)-2-(4-fluorostyryl)-4,4,5,5-tetramethyl-1,3,2-dioxaborolane.....                                                      | 70 |
| 6.5.3.      | <b>33b</b> – (E)-2-(4-chlorostyryl)-4,4,5,5-tetramethyl-1,3,2-dioxaborolane.....                                                      | 71 |
| 6.5.4.      | <b>34b</b> – (E)-2-(4-bromostyryl)-4,4,5,5-tetramethyl-1,3,2-dioxaborolane .....                                                      | 73 |
| 6.5.5.      | <b>35b</b> – (E)-4,4,5,5-tetramethyl-2-(4-(trifluoromethyl)styryl)-1,3,2-dioxaborolane<br>74                                          |    |
| 6.5.6.      | <b>36b</b> – (E)-2-(4-methoxystyryl)-4,4,5,5-tetramethyl-1,3,2-dioxaborolane.....                                                     | 76 |
| 6.5.7.      | <b>37b</b> – (E)-4,4,5,5-tetramethyl-2-(4-methylstyryl)-1,3,2-dioxaborolane.....                                                      | 77 |
| 6.5.8.      | <b>38b</b> – (E)-4,4,5,5-tetramethyl-2-(3-methylstyryl)-1,3,2-dioxaborolane.....                                                      | 78 |
| <b>6.6.</b> | <b>Nitriles</b> .....                                                                                                                 | 80 |
| 6.6.1.      | <b>9b</b> – N-benzyl-4,4,5,5-tetramethyl-N-(4,4,5,5-tetramethyl-1,3,2-dioxaborolan-2-yl)-1,3,2-dioxaborolan-2-amine .....             | 80 |
| 6.6.2.      | <b>39b</b> – N-(4-bromobenzyl)-4,4,5,5-tetramethyl-N-(4,4,5,5-tetramethyl-1,3,2-dioxaborolan-2-yl)-1,3,2-dioxaborolan-2-amine .....   | 81 |
| 6.6.3.      | <b>40b</b> – N-(4-methoxybenzyl)-4,4,5,5-tetramethyl-N-(4,4,5,5-tetramethyl-1,3,2-dioxaborolan-2-yl)-1,3,2-dioxaborolan-2-amine ..... | 83 |

|            |                                                                                                                                          |     |
|------------|------------------------------------------------------------------------------------------------------------------------------------------|-----|
| 6.6.4.     | <b>41b</b> – N-(cyclohexylmethyl)-4,4,5,5-tetramethyl-N-(4,4,5,5-tetramethyl-1,3,2-dioxaborolan-2-yl)-1,3,2-dioxaborolan-2-amine .....   | 84  |
| 6.6.5.     | <b>42b</b> – N-butyl-4,4,5,5-tetramethyl-N-(4,4,5,5-tetramethyl-1,3,2-dioxaborolan-2-yl)-1,3,2-dioxaborolan-2-amine .....                | 86  |
| 6.6.6.     | <b>43b</b> - 4,4,5,5-tetramethyl-N-(pyridin-4-ylmethyl)-N-(4,4,5,5-tetramethyl-1,3,2-dioxaborolan-2-yl)-1,3,2-dioxaborolan-2-amine ..... | 87  |
| 6.6.7.     | <b>44b</b> – 4,4,5,5-tetramethyl-N-(pyridin-2-ylmethyl)-N-(4,4,5,5-tetramethyl-1,3,2-dioxaborolan-2-yl)-1,3,2-dioxaborolan-2-amine ..... | 89  |
| <b>7.</b>  | <b>Studies into Catalyst-Product Interactions</b> .....                                                                                  | 90  |
| <b>8.</b>  | <b>Studies into Catalyst-Substrate Interactions</b> .....                                                                                | 93  |
| <b>9.</b>  | <b>Testing for Hidden Catalysis</b> .....                                                                                                | 94  |
| <b>10.</b> | <b>Catalyst Recycling</b> .....                                                                                                          | 96  |
| <b>11.</b> | <b>Crystallographic Data</b> .....                                                                                                       | 99  |
| <b>12.</b> | <b>Geometry Optimized Structures</b> .....                                                                                               | 100 |
| <b>13.</b> | <b>References</b> .....                                                                                                                  | 114 |

## 1. Methods & Materials

### 1.1. Experimental Considerations

All manipulations were performed under an inert atmosphere using standard Schlenk-line, and glovebox techniques. Glassware was flame dried prior to use.

Dry THF, Et<sub>2</sub>O, toluene, and pentane were obtained using Innovative Technologies anhydrous engineering solvent purification systems and subsequently degassed. DME was dried over Na and purified by distillation. C<sub>6</sub>D<sub>6</sub>, and toluene-d<sub>8</sub>, were dried over activated 3 Å molecular sieves. All solvents were stored over activated 3 Å molecular sieves.

Elemental phosphorus (Merck), Naphthalene (Fluorochem), chloro(dimethyl)vinylsilane (ClSiMe<sub>2</sub>CHCH<sub>2</sub>, Merck), 9-Borabicyclo[3.3.1]nonane dimer (9-BBN dimer, Merck) and all organic substrates (**4a** to **44a**) used in this study were purchased from commercial sources and used without any further purification. [Na(DME)<sub>x</sub>]<sub>3</sub>P<sub>7</sub> and (Me<sub>3</sub>Si)<sub>3</sub>P<sub>7</sub> were synthesized according to previously reported synthetic procedures.<sup>1</sup>

### 1.2. Analytical Considerations

**NMR Spectroscopy.** <sup>1</sup>H, <sup>11</sup>B, <sup>11</sup>B{<sup>1</sup>H}, <sup>13</sup>C{<sup>1</sup>H}, <sup>19</sup>F, <sup>29</sup>Si DEPT90, <sup>31</sup>P NMR spectra were recorded on a Bruker AVIII 400 spectrometer (operating frequencies: 399.78 MHz, 128.36 MHz, 100.53 MHz, 376.17 MHz, 79.48 MHz and 161.83 MHz for <sup>1</sup>H, <sup>11</sup>B, <sup>13</sup>C, <sup>19</sup>F, <sup>29</sup>Si and <sup>31</sup>P, respectively). <sup>1</sup>H and <sup>13</sup>C{<sup>1</sup>H} NMR chemical shifts were internally referenced to the residual solvent resonances (C<sub>6</sub>D<sub>6</sub> (benzene-d<sub>6</sub>): <sup>1</sup>H δ = 7.16 ppm, <sup>13</sup>C{<sup>1</sup>H} δ = 128.02 ppm, C<sub>7</sub>D<sub>8</sub> (toluene-d<sub>8</sub>): <sup>1</sup>H δ = 7.09, 7.00, 6.98, 2.09 ppm, <sup>13</sup>C{<sup>1</sup>H} δ = 137.86, 129.24, 128.33, 125.49, 20.4 ppm). <sup>11</sup>B, <sup>19</sup>F, <sup>29</sup>Si, <sup>31</sup>P chemical shifts were externally referenced to BF<sub>3</sub>·Et<sub>2</sub>O, CFCl<sub>3</sub>, Me<sub>4</sub>Si, H<sub>3</sub>PO<sub>4</sub>, respectively. NMR samples were prepared under an inert atmosphere in 5 mm J Young NMR tubes. Data was analysed using MestReNova V14.0.0 software. The <sup>11</sup>B{<sup>1</sup>H} NMR spectra of hydroborated alkenes (**7b**, **27b** – **31b**) was collected on a Bruker AVIII 400 spectrometer with a higher background signal of borosilicate.

**Elemental Analysis.** Elemental analysis was carried out by Mr. Martin Jennings and Mrs. Anne Davies at the Microanalytical Service, School of Chemistry, the University of Manchester using a Flash 2000 elemental analyser.

**Mass spectrometry.** Mass spectrometry samples were measured the Mass Spectrometry Service, School of Chemistry, the University of Manchester using an electrospray ionization or atmospheric pressure chemical ionization equipped Thermo Orbitrap Executive Plus Extended Mass Range mass spectrometer. Samples were prepared under a nitrogen atmosphere and injected into the ionization source of the mass spectrometer. For products **5b – 7b, 16b, 18b – 21b, 23b – 25b, 27b – 31b, 37b, 43b** and **44b** significant decomposition of the sample was observed, we attributed this to sample wait times in the autosampler. For these samples, they were self-injected immediately after preparation into a low-resolution electrospray ionization equipped Thermo Fischer LCQ Fleet mass spectrometer.

### 1.3. Single Crystal X-ray Diffraction Considerations

**Data collection:** X-ray diffraction data for compound **1** were collected using a Rigaku Oxford Diffraction Supernova diffractometer, equipped with a 4-circle kappa goniometer, a MoK $\alpha$  ( $\lambda = 0.71073 \text{ \AA}$ ) microfocus source, an Eos CCD detector and an Oxford cryosystems Cryostream 700 nitrogen gas flow system, at a temperature of 100K. X-ray diffraction data for compound **2** were collected using a dual wavelength Rigaku FR-X rotating anode diffractometer using CuK $\alpha$  ( $\lambda = 1.54146 \text{ \AA}$ ) radiation, equipped with an AFC-11 4-circle kappa goniometer, VariMAX<sup>TM</sup> microfocus optics, a Hypix-6000HE detector and an Oxford Cryosystems 800 plus nitrogen flow gas system, at a temperature of 100K. Data were collected and reduced using CrysAlisPro v42. Absorption correction was performed using empirical methods (SCALE3 ABSPACK) based upon symmetry-equivalent reflections combined with measurements at different azimuthal angles.

**Crystal structure determination and refinements:** The crystal structure was solved and refined against all  $F^2$  values using the SHELX and Olex2 suite of programmes.<sup>2</sup>  
<sup>3</sup> All atoms were refined anisotropically. Hydrogen atoms were placed in calculated positions and refined using idealized geometries and assigned fixed isotropic displacement parameters. Data for compound **2** were poor, as the crystals of the

sample form as polycrystalline aggregates. As a result, there is a large contribution to the observed intensities from other diffracting components. This intensity contribution could not be accounted for by treating the data-set as a multi-component twin. As such, during the data reduction only reflections with good profiles were kept in order to strip out those with the worst other-component contribution. This results in low (95%) completeness for the data-set, in addition to the inclusion of some reflections with poorly fitting intensities that happened to have good reflection profiles. A consequence of this is a poor fit to weak reflections (high  $wR_2$ ) and low bond precision (due to additional residual noise in the electron density map). However, the overall validity of the structural model is not impinged by this.

For compound **1**, the disordered  $\text{SiMe}_2\text{CHCH}_2$  groups were refined with relatively strong similar neighbouring atomic displacement parameters and rigid bond restraints applied. For compound **2**, 9-BBN moieties were refined to have similar 1,2- and 1,3-bond distances, all carbon and boron atoms were refined with similar neighbouring atomic displacement parameters and rigid bond restraints applied. The disordered solvent pentane was refined to have idealized 1,2- and 1,3- fixed distance restraints. Crystallographic data have been deposited with the CCDC (CCDC 2192816 and 2192817).

#### **1.4. Computational Considerations**

Density Functional Theory (DFT) calculations were performed with the Gaussian09 program package<sup>3</sup> (version g09, rev.d01).<sup>4-8</sup> Geometry optimizations and frequency calculations were conducted at the BP86/SV(p) level of theory. No symmetry constraints were applied during optimization. All minima were confirmed by the absence of imaginary frequencies. Initial geometries were prepared using X-ray diffraction coordinates where possible and Facio V22.1.1.64 software. Gibbs free reaction energies and enthalpies were calculated for standard conditions ( $p = 1 \text{ atm}$ ,  $T = 298 \text{ K}$ ) and are unscaled. HOMO and LUMO images were prepared using Avogadro V1.2.0 software.

## 2. Synthesis

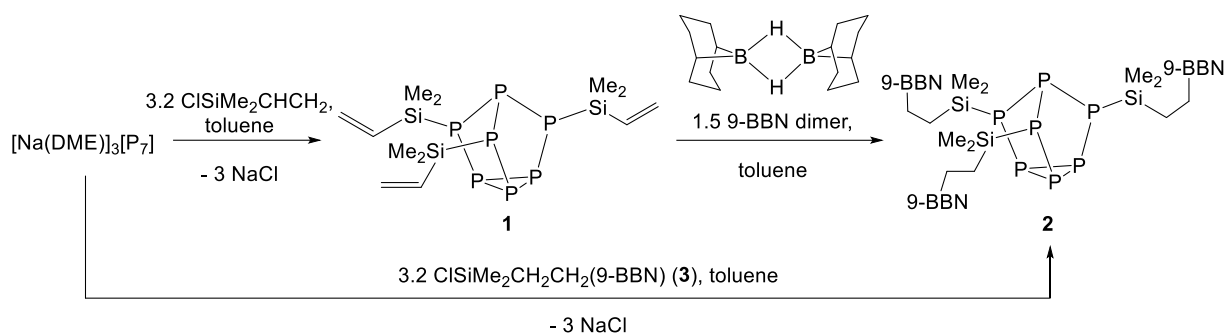

**Scheme S1.** Synthetic routes to  $(\{9\text{-BBN}\}\text{CH}_2\text{CH}_2\text{SiMe}_2)_3\text{P}_7$  (**2**).

### 2.1. Synthesis of $(\text{CH}_2\text{CHSiMe}_2)_3\text{P}_7$ (**1**)

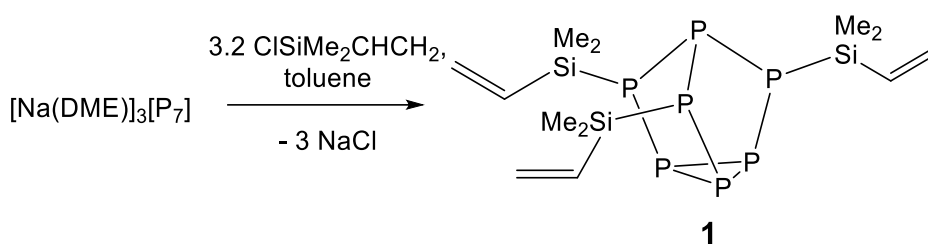

**Scheme S2.** Synthesis of  $(\text{CH}_2\text{CHSiMe}_2)_3\text{P}_7$  (**1**).

To a Schlenk flask charged with a stir bar and  $[\text{Na}(\text{DME})_x]_3[\text{P}_7]$  (1.000 g, ~ 2 mmol), toluene (13 mL) was added and the suspension cooled to  $-78\text{ }^\circ\text{C}$ .  $\text{ClSiMe}_2\text{CHCH}_2$  (0.9 mL, 6.52 mmol) was added dropwise. The suspension was warmed to room temperature and the resulting black solution was stirred for three days. The mixture was filtered yielding a clear orange solution. The solvent was removed under reduced pressure resulting in a yellow/orange powder of  $(\text{CH}_2\text{CHSiMe}_2)_3\text{P}_7$  (**1**) which was dried under reduced pressure for five hours. Single crystals suitable of single crystal XRD analysis were obtained through cooling down a concentrated toluene solution.

**Isolated Yield:** 0.816 g, 1.73 mmol, 86 %.

**$^1\text{H}$  NMR (400 MHz, 298 K,  $\text{C}_6\text{D}_6$ ):**  $\delta$  = 6.18 (dd,  $^3J_{\text{HH}} = 20.1$  Hz,  $^3J_{\text{HH}} = 14.4$  Hz, 3H, CH), 5.83 (dd,  $^3J_{\text{HH}} = 14.4$  Hz,  $^2J_{\text{HH}} = 3.2$  Hz, 3H, *cis*- $\text{CH}_2$ ), 5.63 (dd,  $^3J_{\text{HH}} = 20.1$  Hz,  $^2J_{\text{HH}} = 3.2$  Hz, 3H, *trans*- $\text{CH}_2$ ), 0.30 (s, 18H,  $\text{SiCH}_3$ ) ppm.

**$^{13}\text{C}\{^1\text{H}\}$  NMR (101 MHz, 298 K,  $\text{C}_6\text{D}_6$ ):**  $\delta$  = 138.36 (s, CH), 133.32 (s,  $\text{CH}_2$ ), 1.57 (s,  $\text{SiCH}_3$ ) ppm.

**$^{29}\text{Si}\{^1\text{H}\}$  NMR (79 MHz, 298 K,  $\text{C}_6\text{D}_6$ ):**  $\delta$  =  $-2.36$  (d,  $^1J_{\text{SiP}} = 42.5$  Hz) ppm.

**$^{31}\text{P}$  NMR (162 MHz, 298 K,  $\text{C}_6\text{D}_6$ ):**  $\delta = -152.69 - -159.38$  (m, 3P, *basal*),  $-95.78 - -103.24$  (qq,  $^1J_{\text{PP}} = 324.2$  Hz,  $^2J_{\text{PP}} = 45.92$  Hz, 1P, *apical*),  $6.22 - -2.42$  (m, 3P, *linking*) ppm.

**Elemental analysis:** Expected/Found: C = 30.51/ 30.58; H = 5.76/ 5.57; N = 0/ 0.

**Mass spectrometry (APCI):**  $\text{C}_{12}\text{H}_{27}\text{P}_7\text{Si}_3 + \text{H}$  ( $[\text{M} + \text{H}]^+$ ); Calcd. = 472.9657, Found = 472.9666.

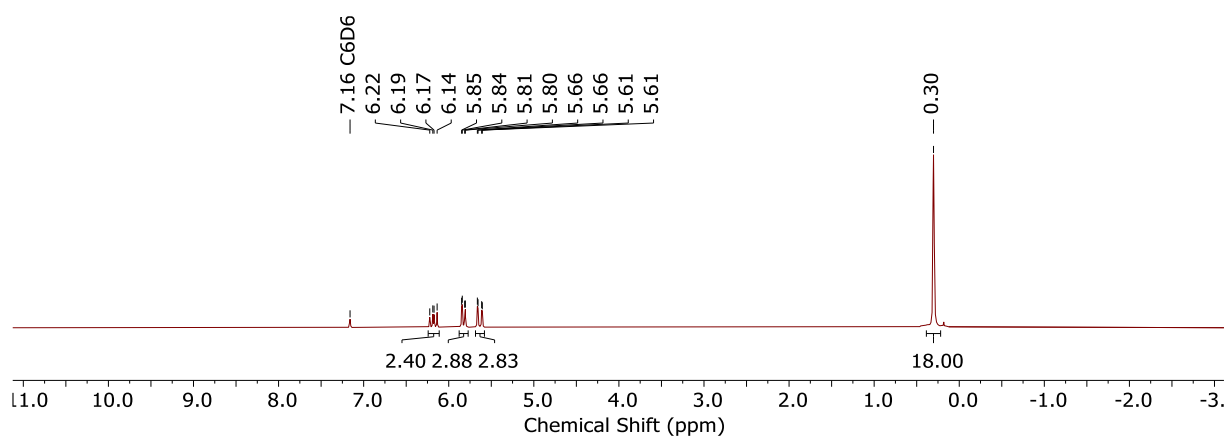

**Figure S1.**  $^1\text{H}$  NMR spectrum ( $\text{C}_6\text{D}_6$ ) of **1**.

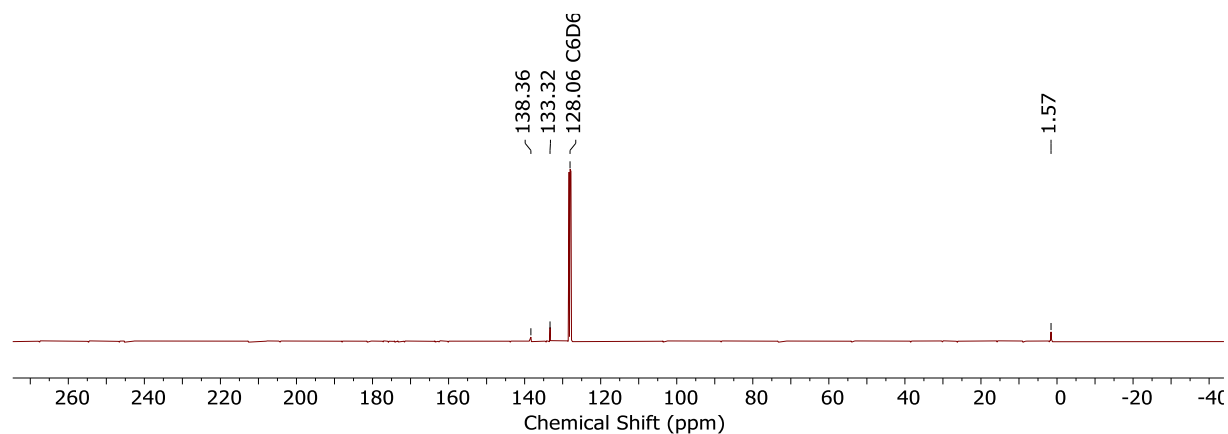

**Figure S2.**  $^{13}\text{C}\{^1\text{H}\}$  NMR spectrum ( $\text{C}_6\text{D}_6$ ) of **1**.



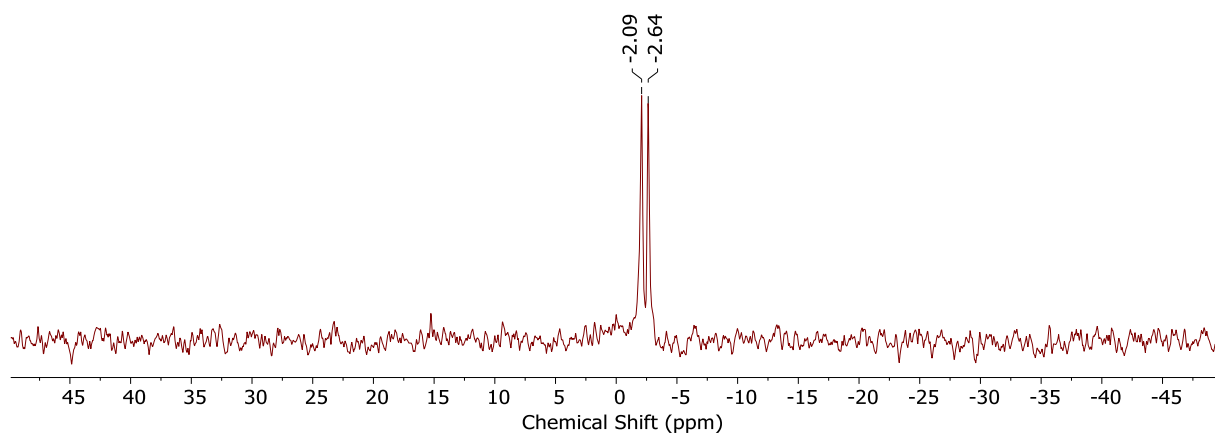

**Figure S3.**  $^{29}\text{Si}\{^1\text{H}\}$  NMR spectrum ( $\text{C}_6\text{D}_6$ ) of **1**.

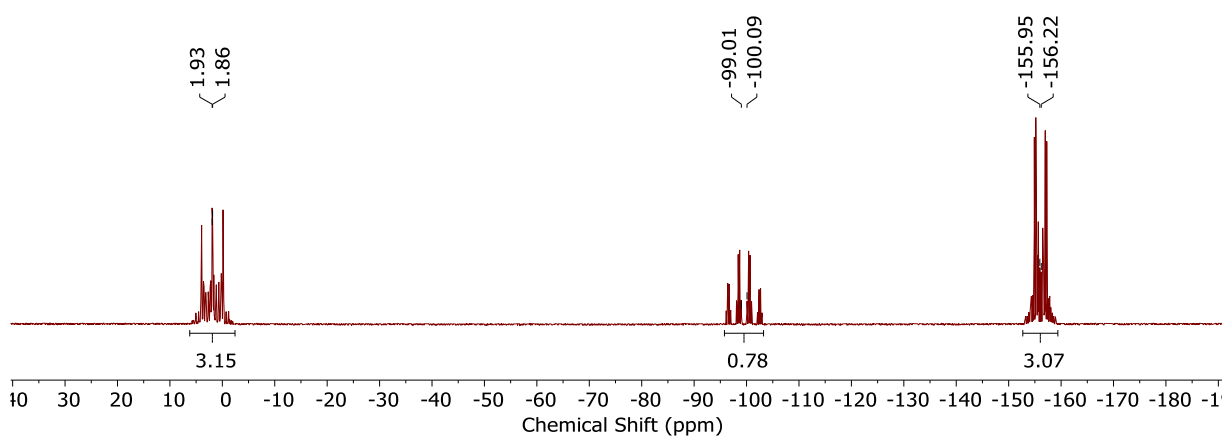

**Figure S4.**  $^{31}\text{P}$  NMR spectrum ( $\text{C}_6\text{D}_6$ ) of **1**.

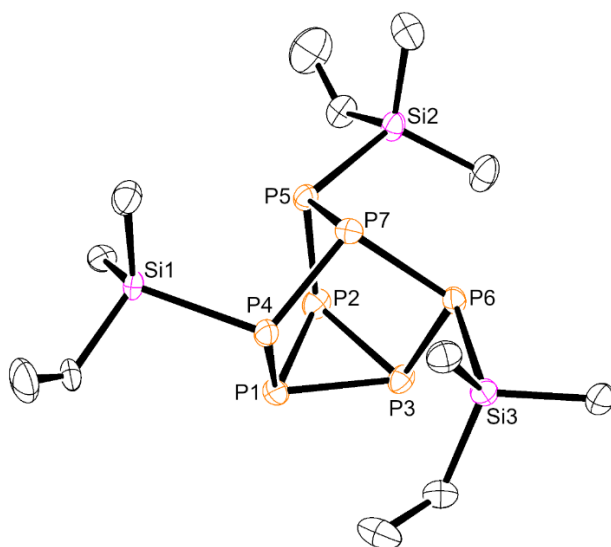

**Figure S5.** Molecular structure of **1**. Anisotropic displacement ellipsoids pictured at 50% probability. Hydrogen atoms omitted for clarity. Phosphorus: Orange; Silicon: Pink; Carbon: Black.

## 2.2. Synthesis of $(\{9\text{-BBN}\}\text{CH}_2\text{CH}_2\text{SiMe}_2)_3\text{P}_7$ (**2**)

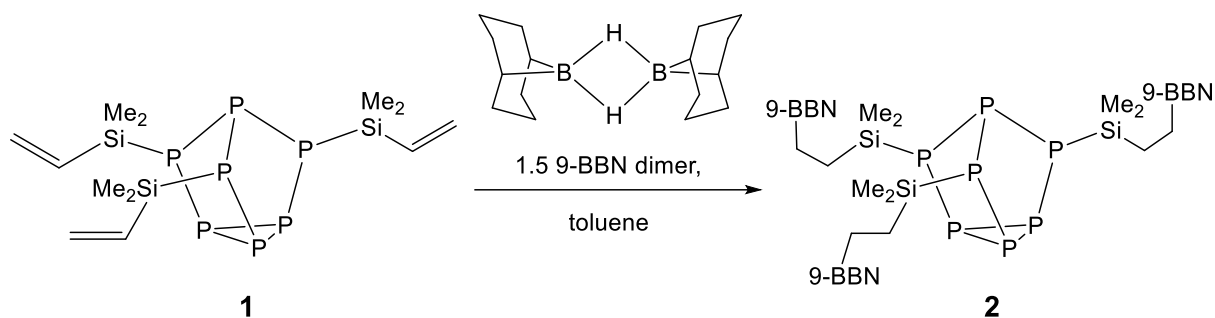

### Scheme S3. Synthesis of $(\{9\text{-BBN}\}\text{CH}_2\text{CH}_2\text{SiMe}_2)_3\text{P}_7$ (**2**).

To a Schlenk flask charged with a stir bar,  $(\text{CH}_2\text{CHSiMe}_2)_3\text{P}_7$  (**1**, 1.000 g, 2.12 mmol) and 9-BBN dimer (0.775 g, 3.17 mmol), toluene (10 mL) was added at room temperature. The suspension was stirred for three days, volatiles were removed under reduced pressure and the residue was washed with  $\text{Et}_2\text{O}$  (4 mL). The resulting pale yellow powder was dried under reduced pressure for five hours yielding  $(\{9\text{-BBN}\}\text{CH}_2\text{CH}_2\text{SiMe}_2)_3\text{P}_7$  (**2**).

**Isolated Yield:** 1.350 g, 1.61 mmol, 76 %

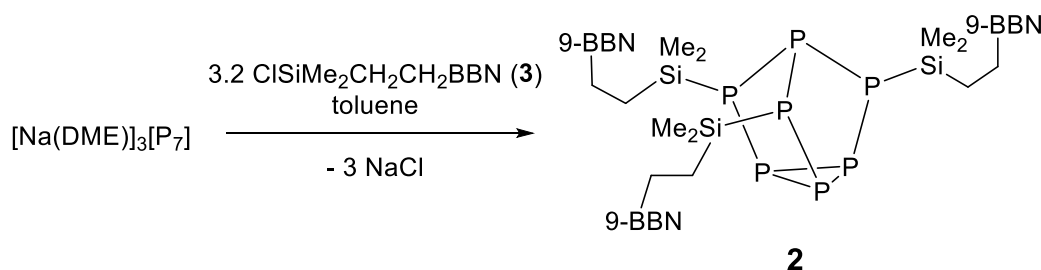

### Scheme S4. Alternate synthesis of $(\{9\text{-BBN}\}\text{CH}_2\text{CH}_2\text{SiMe}_2)_3\text{P}_7$ (**2**).

**2** can alternatively be prepared directly from  $[\text{Na}(\text{DME})]_3[\text{P}_7]$ : A Schlenk flask was charged with a stir bar and  $[\text{Na}(\text{DME})]_3[\text{P}_7]$  (0.500 g, ~ 1 mmol) and toluene (10 mL).  $\text{ClSiMe}_2\text{CH}_2\text{CH}_2(9\text{-BBN})$  (**3**, 0.791 g, 3.26 mmol) in toluene (5 mL) was added dropwise at room temperature and the suspension stirred for five days. The suspension was settled and filtered yielding a clear yellow solution. Volatiles were removed under reduced pressure and the residue was washed with pentane (5 mL) and  $\text{Et}_2\text{O}$  (5 mL) The resulting pale yellow powder was dried under reduced pressure for five hours yielding  $(\{9\text{-BBN}\}\text{CH}_2\text{CH}_2\text{SiMe}_2)_3\text{P}_7$  (**2**). Crystals suitable for single crystal XRD analysis were obtained either concentrated pentane or  $\text{Et}_2\text{O}$  solutions at room temperature for several days.

**Isolated Yield:** 0.803 g, 0.96 mmol, 94 %.

**$^1\text{H}$  NMR (400 MHz, 298 K,  $\text{C}_6\text{D}_6$ ):**  $\delta$  = 1.66 – 1.95 (m, 36H,  $\text{CH}_2$ ), 1.46 (m, 6H,  $\text{CH}_2$ ), 1.24 (m, 6H,  $\text{CH}$ ), 0.90 (m, 6H,  $\text{CH}_2$ ), 0.33 (s, 18H,  $\text{SiCH}_3$ ) ppm.

**$^{11}\text{B}$  NMR (128 MHz, 298 K,  $\text{C}_6\text{D}_6$ ):**  $\delta$  = 86.48 (s) ppm.

**$^{13}\text{C}\{^1\text{H}\}$  NMR (101 MHz, 298 K,  $\text{C}_6\text{D}_6$ ):**  $\delta$  = 33.69 (s, 9-BBN), 31.51 (s, 9-BBN), 23.70 (s, 9-BBN), 21.23 (s,  $\text{CH}_2$ ), 12.27 (s,  $\text{CH}_2$ ), 1.63 (s,  $\text{SiCH}_3$ ) ppm.

**$^{29}\text{Si}\{^1\text{H}\}$  NMR (79 MHz, 298 K,  $\text{C}_6\text{D}_6$ ):**  $\delta$  = 11.75 (d,  $^1J_{\text{SiP}}$  = 49.2 Hz) ppm.

**$^{31}\text{P}$  NMR (162 MHz, 298 K,  $\text{C}_6\text{D}_6$ ):**  $\delta$  = -153.49 – -160.46 (m, 3P, *basal*), -96.41 – -105.05 (qq,  $^1J_{\text{PP}}$  = 325.1 Hz,  $^2J_{\text{PP}}$  = 45.5 Hz, 1P, *apical*), -0.12 – -8.47 (m, 3P, *linking*) ppm.

**Elemental analysis:** Expected/Found: C = 51.57/ 51.66; H = 8.66/ 8.67; N = 0/ 0.

**Mass spectrometry (APCI):**  $\text{C}_{36}\text{H}_{72}\text{B}_3\text{P}_7\text{Si}_3+\text{Na}$  ( $[\text{M}+\text{Na}]^+$ ); Calcd. = 861.3282, Found = 861.3307.

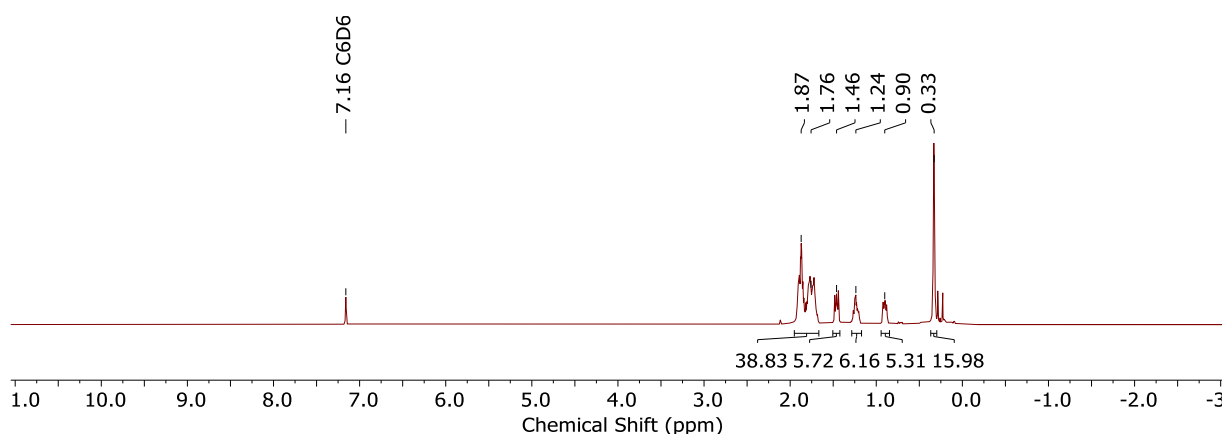

**Figure S6.**  $^1\text{H}$  NMR spectrum ( $\text{C}_6\text{D}_6$ ) of **2**.

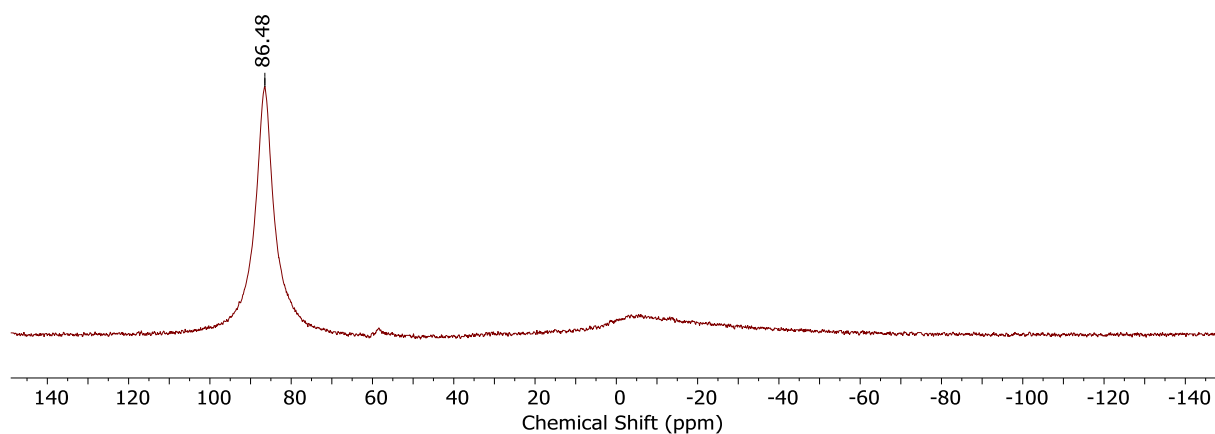

**Figure S7.**  $^{11}\text{B}$  NMR spectrum ( $\text{C}_6\text{D}_6$ ) of **2**.

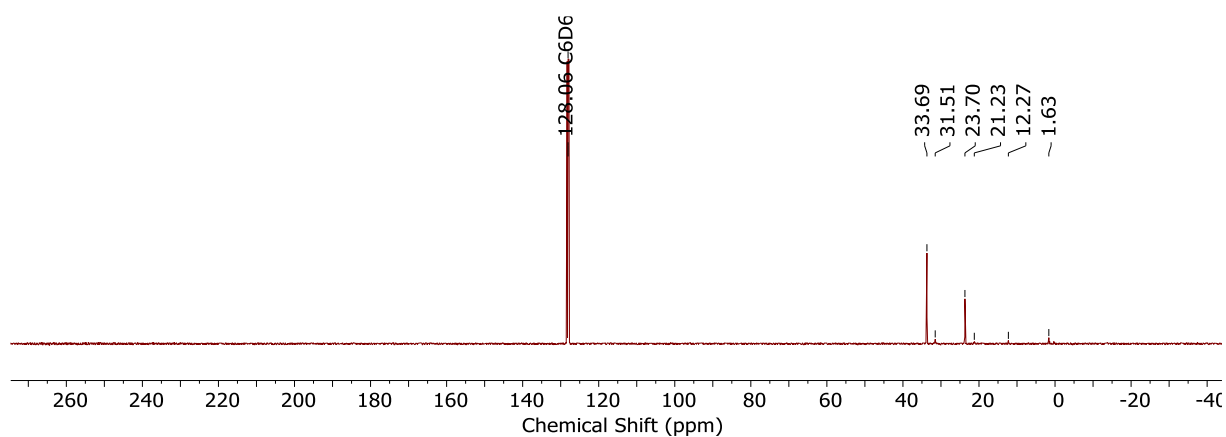

**Figure S8.**  $^{13}\text{C}\{^1\text{H}\}$  NMR spectrum ( $\text{C}_6\text{D}_6$ ) of **2**.

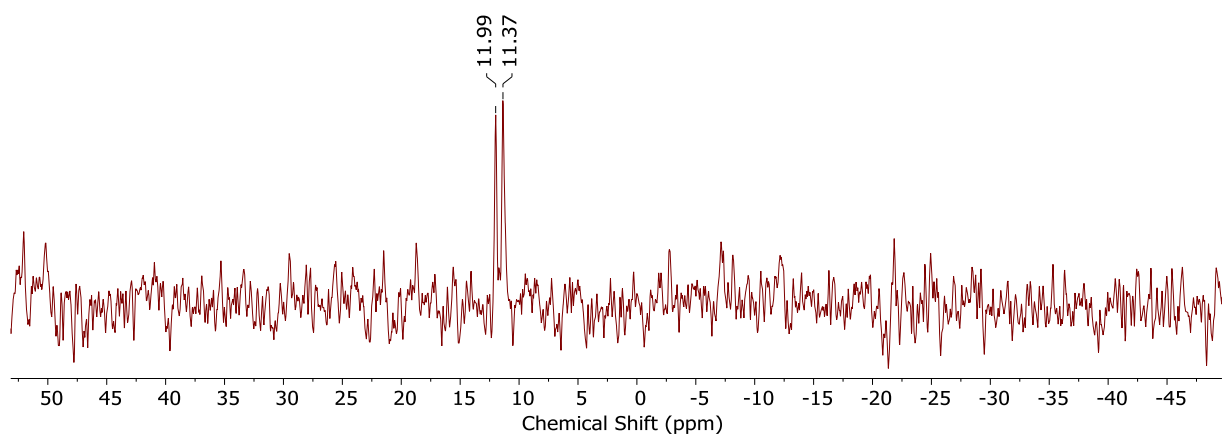

**Figure S9.**  $^{29}\text{Si}\{^1\text{H}\}$  NMR spectrum ( $\text{C}_6\text{D}_6$ ) of **2**.

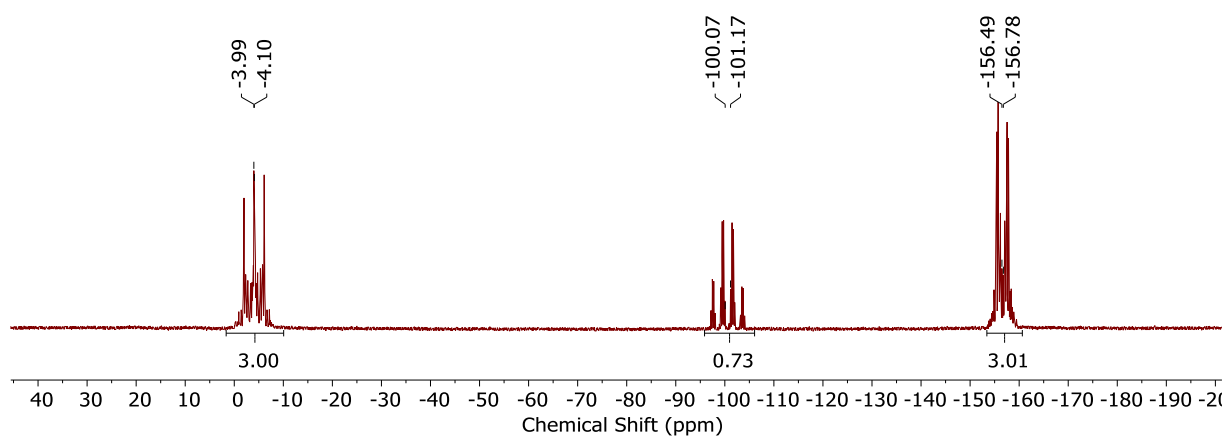

**Figure S10.**  $^{31}\text{P}$  NMR spectrum ( $\text{C}_6\text{D}_6$ ) of **2**.

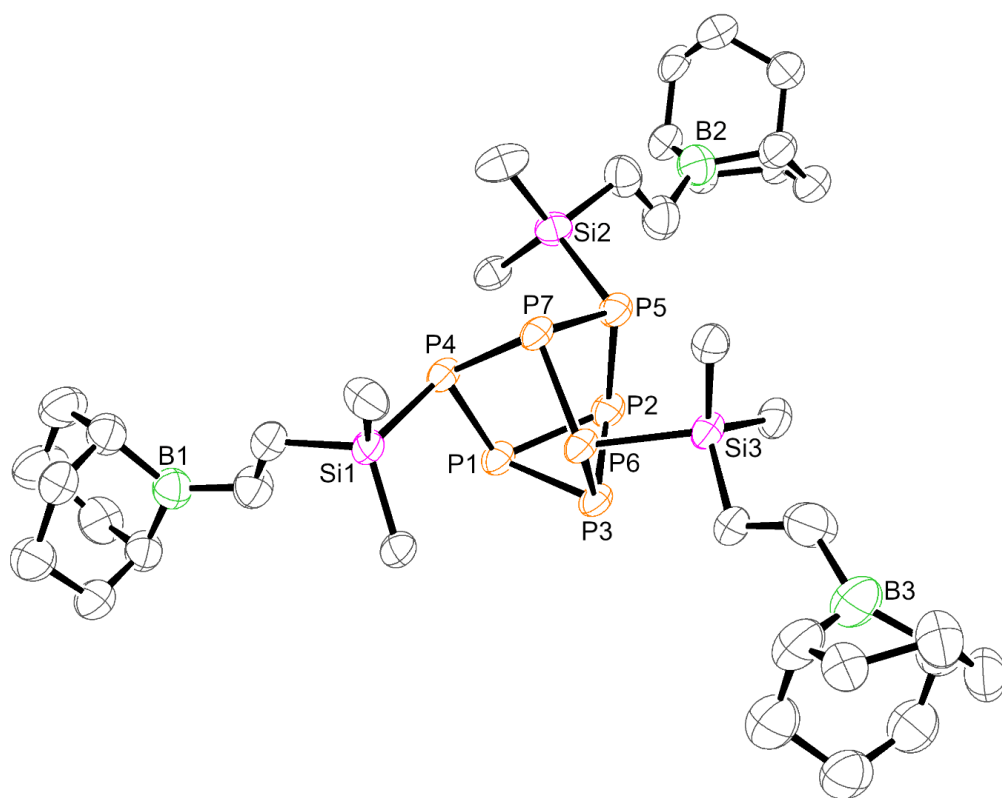

**Figure S11.** Molecular structure of **2**. Anisotropic displacement ellipsoids pictured at 50% probability. Hydrogen atoms and pentane omitted for clarity. Phosphorus: Orange; Silicon: Pink; Boron: Green; Carbon: Black.

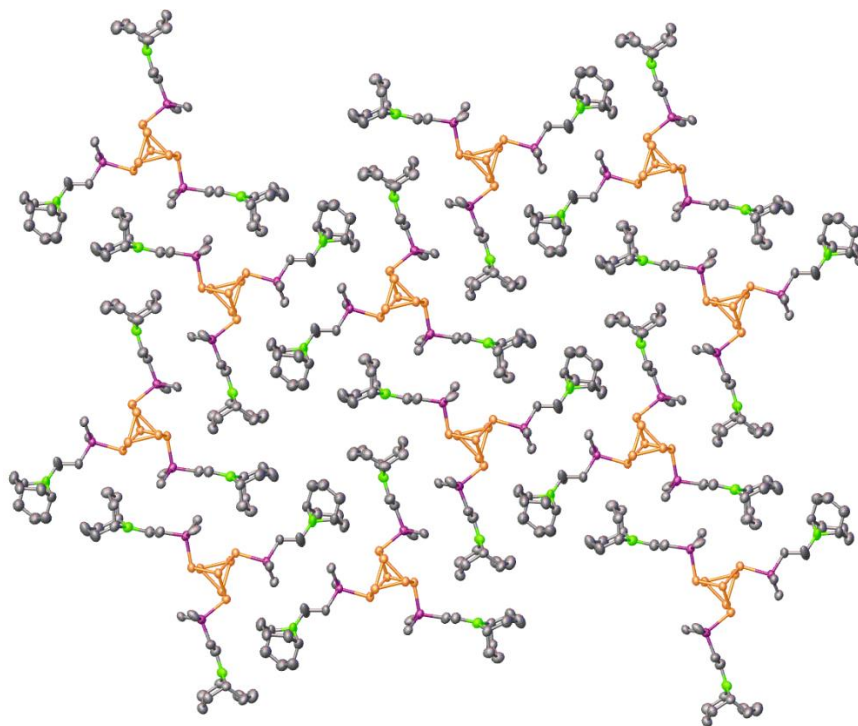

**Figure S12.** Crystal packing structure of **2**. Hydrogen atoms and pentane omitted for clarity. Phosphorus: Orange; Silicon: Pink; Boron: Green; Carbon: Grey.

### 2.3. Synthesis of ClSiMe<sub>2</sub>CH<sub>2</sub>CH<sub>2</sub>(9-BBN) (**3**)

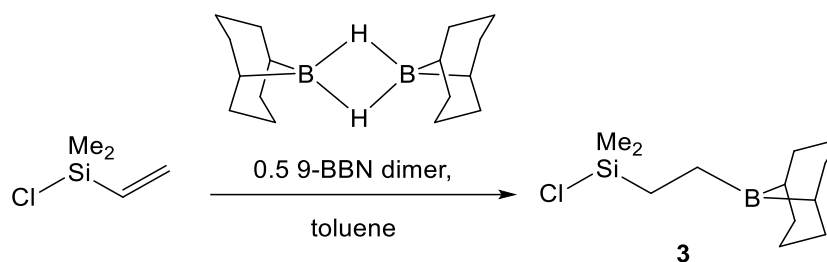

#### Scheme S5. Synthesis of ClSiMe<sub>2</sub>CH<sub>2</sub>CH<sub>2</sub>(9-BBN) (**3**).

To a Schlenk flask charged with a stir bar, 9-BBN dimer (1.768 g, 7.24 mmol) was partially dissolved in toluene (15 mL). ClSiMe<sub>2</sub>CH=CH<sub>2</sub> (2 mL, 1.748 g, 14.48 mmol) in toluene (5 mL) was added dropwise to the vigorously stirring solution at which point all remaining 9-BBN dimer dissolved. The reaction was stirred at room temperature for two days at which point volatiles were removed under reduced pressure and the resulting colourless oil dried for three hours yielding ClSiMe<sub>2</sub>CH<sub>2</sub>CH<sub>2</sub>(9-BBN) (**3**).

**Isolated Yield:** 2.977 g, 12.27 mmol, 85 %.

**<sup>1</sup>H NMR (400 MHz, 298 K, C<sub>6</sub>D<sub>6</sub>):** δ = 1.58 – 1.90 (m, 12H, CH<sub>2</sub>), 1.37 (t, <sup>1</sup>J<sub>HH</sub> = 8.2 Hz, 2H, CH<sub>2</sub>), 1.12 – 1.24 (m, 2H, CH), 0.81 (t, <sup>1</sup>J<sub>HH</sub> = 8.2 Hz, 2H, CH<sub>2</sub>), 0.28 (s, 6H, SiCH<sub>3</sub>) ppm.

**<sup>11</sup>B NMR (128 MHz, 298 K, C<sub>6</sub>D<sub>6</sub>):** δ = 87.01 (s) ppm.

**<sup>13</sup>C{<sup>1</sup>H} NMR (101 MHz, 298 K, C<sub>6</sub>D<sub>6</sub>):** δ = 33.62 (s, 9-BBN), 31.45 (s, 9-BBN), 23.64 (s, 9-BBN), 19.57 (s, CH<sub>2</sub>), 12.12 (s, CH<sub>2</sub>), 1.28 (s, SiCH<sub>3</sub>) ppm.

**<sup>29</sup>Si{<sup>1</sup>H} NMR (79 MHz, 298 K, C<sub>6</sub>D<sub>6</sub>):** δ = 32.66 (s) ppm.

**Mass spectrometry (APCI):** C<sub>12</sub>H<sub>24</sub>BSiCl-H ([M-H]<sup>-</sup>); Calcd. = 241.1356, Found = 241.1351.

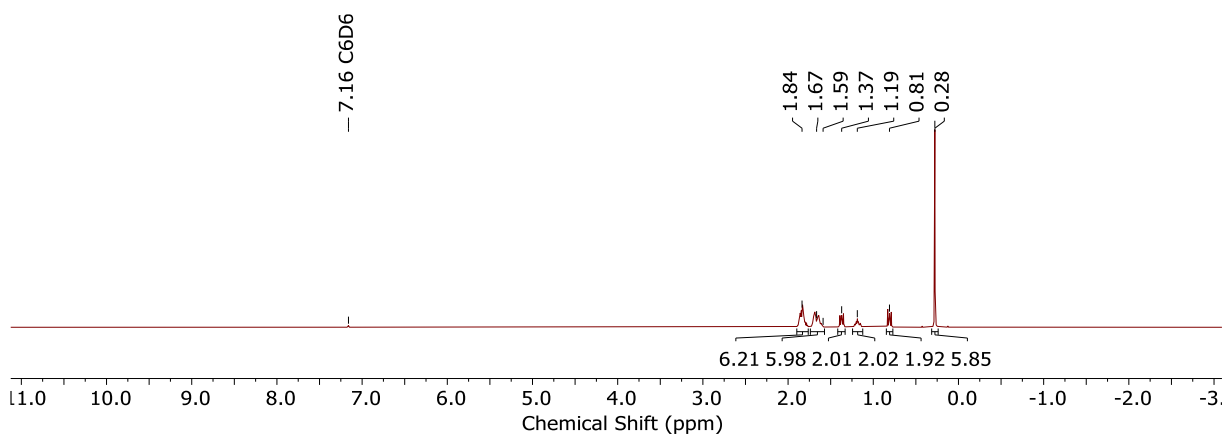

Figure S13. <sup>1</sup>H NMR spectrum (C<sub>6</sub>D<sub>6</sub>) of **3**.

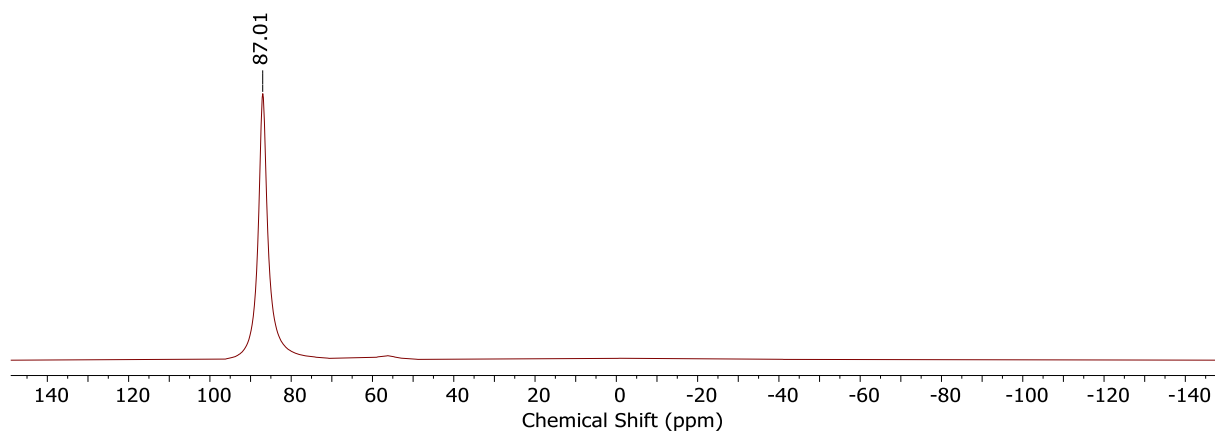

**Figure S14.**  $^{11}\text{B}$  NMR spectrum ( $\text{C}_6\text{D}_6$ ) of **3**.

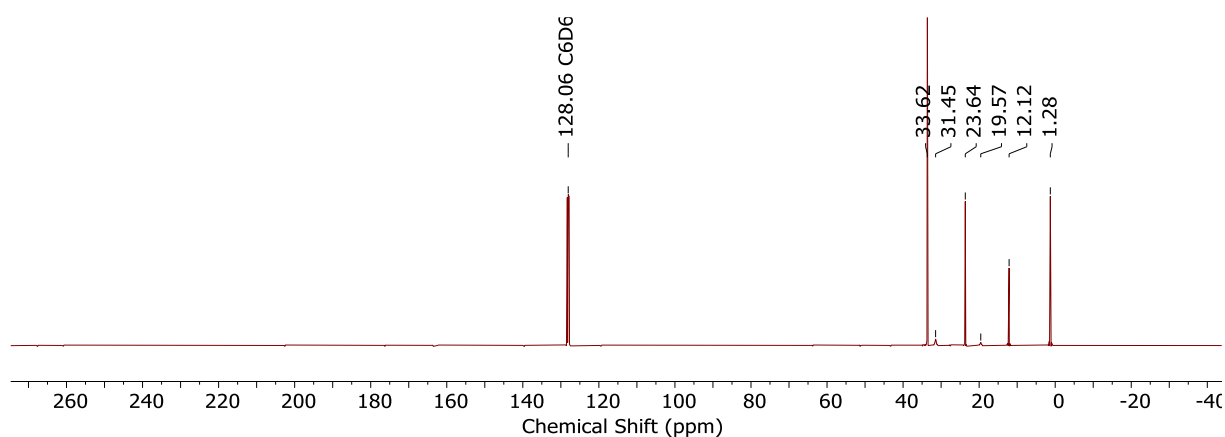

**Figure S15.**  $^{13}\text{C}\{^1\text{H}\}$  NMR spectrum ( $\text{C}_6\text{D}_6$ ) of **3**.

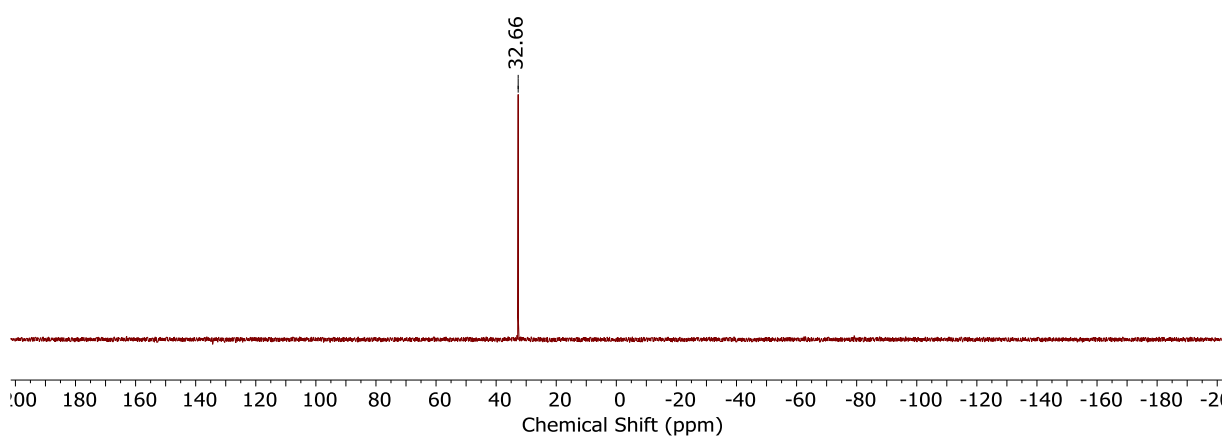

**Figure S16.**  $^{29}\text{Si}\{^1\text{H}\}$  NMR spectrum ( $\text{C}_6\text{D}_6$ ) of **3**.

#### 2.4. Solution Stability of $(\{9\text{-BBN}\}\text{CH}_2\text{CH}_2\text{SiMe}_2)_3(\text{P}_7)$ (**2**)

33 mg of **2** was dissolved in 0.5 mL  $\text{C}_6\text{D}_6$  and monitored by NMR spectroscopy at 25 °C, 50 °C and 110 °C. No evidence for decomposition was observed over 72 hours at 25 °C, 120 hours at 50 °C, and 168 hours at 110 °C. The small singlet in the  $^{31}\text{P}$  NMR spectrum at  $-187.67$  ppm observed after 168 hours at 110 °C accounts only for <4 % and no other decomposition in other NMR spectra was observed.

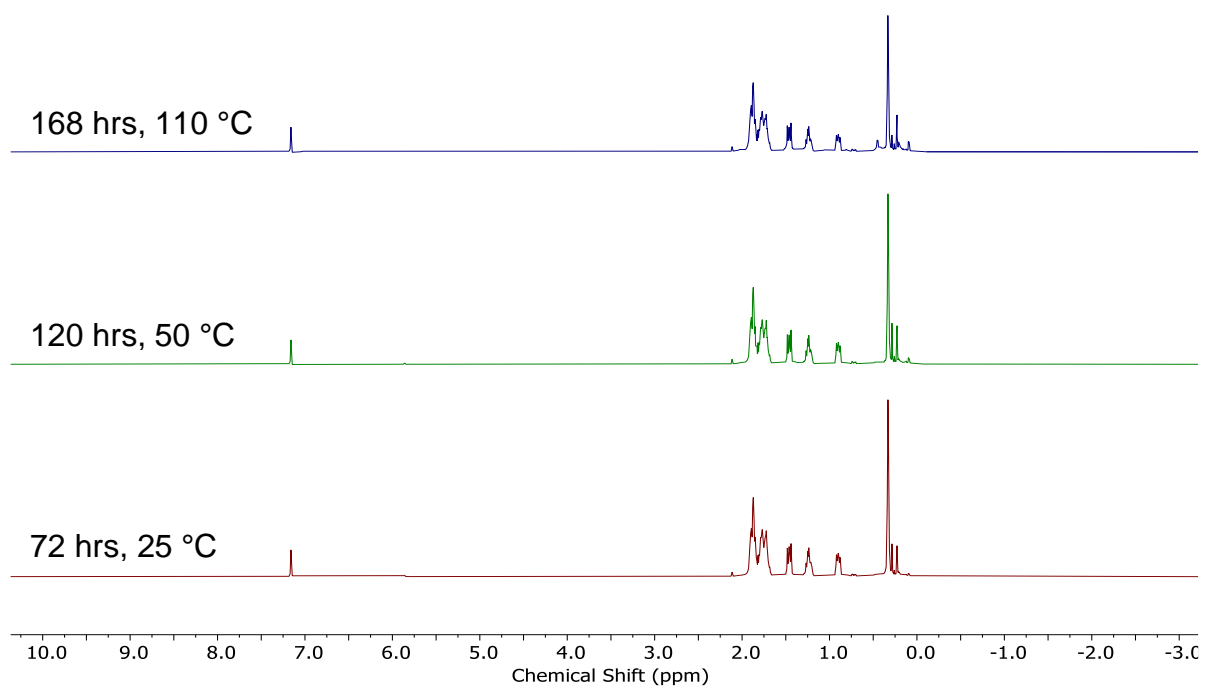

**Figure S17.** Stacked  $^1\text{H}$  NMR spectrum ( $\text{C}_6\text{D}_6$ ) of **2** after prolonged heating.

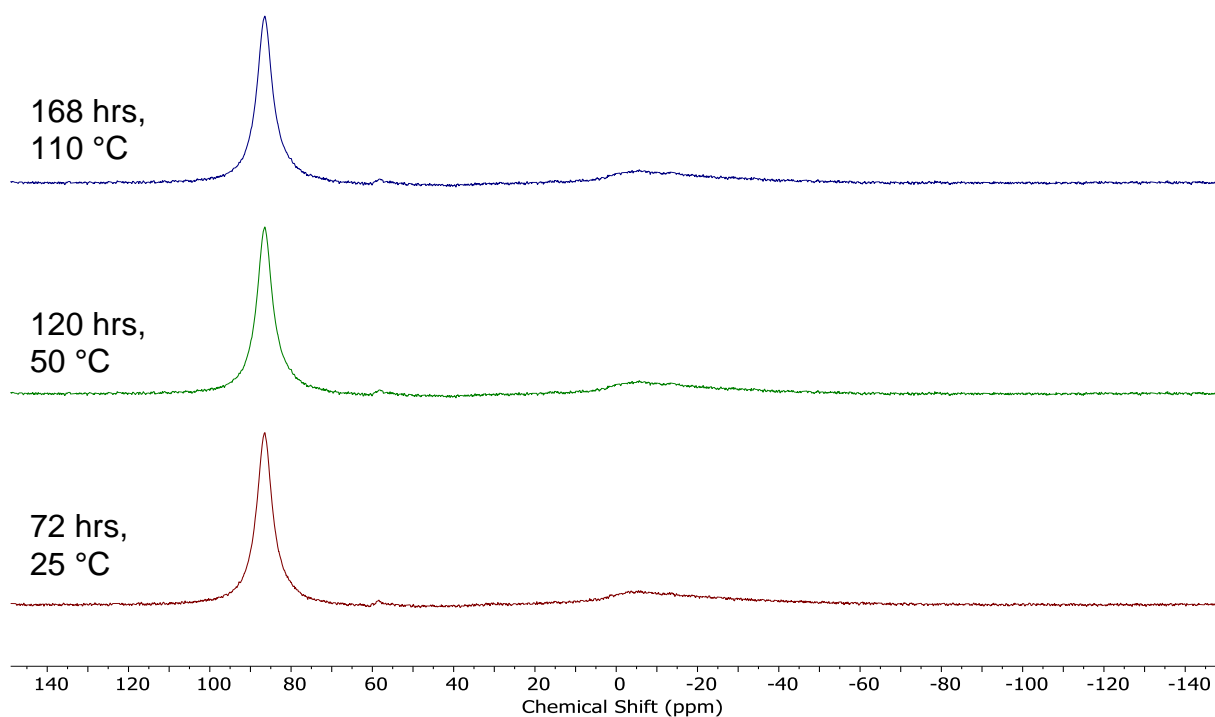

**Figure S18.** Stacked  $^{11}\text{B}$  NMR spectrum ( $\text{C}_6\text{D}_6$ ) of **2** after prolonged heating.



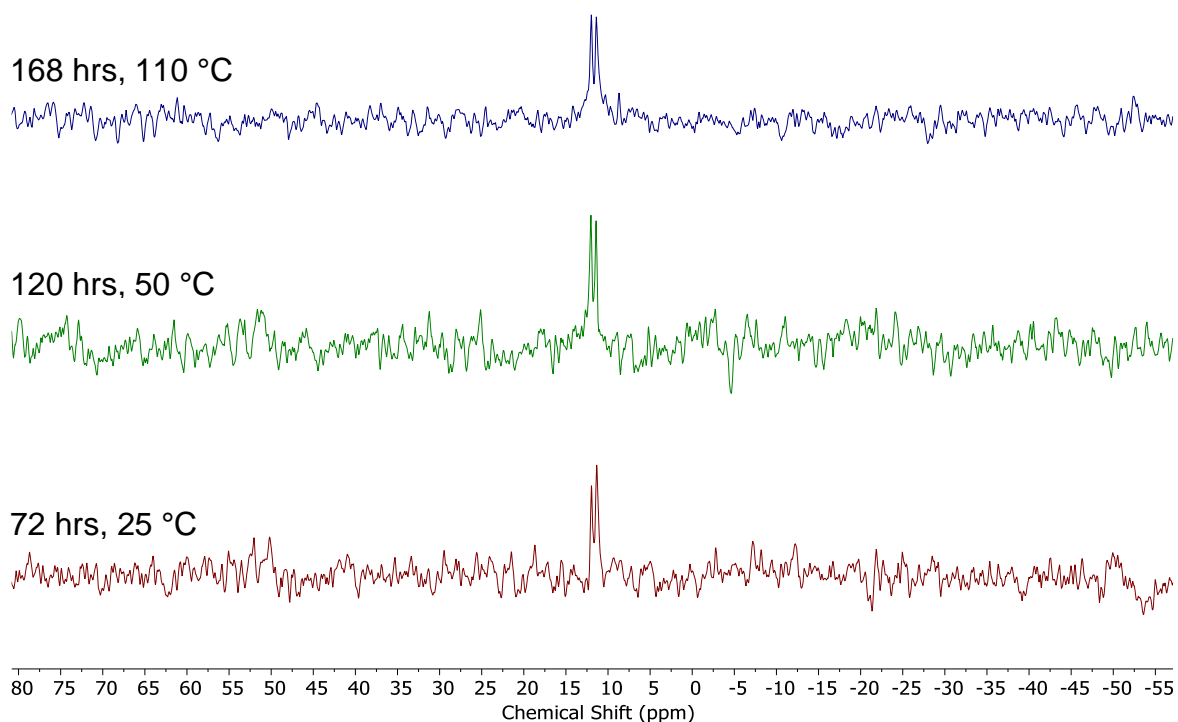

**Figure S19.** Stacked  $^{29}\text{Si}\{^1\text{H}\}$  NMR spectrum ( $\text{C}_6\text{D}_6$ ) of **2** after prolonged heating.

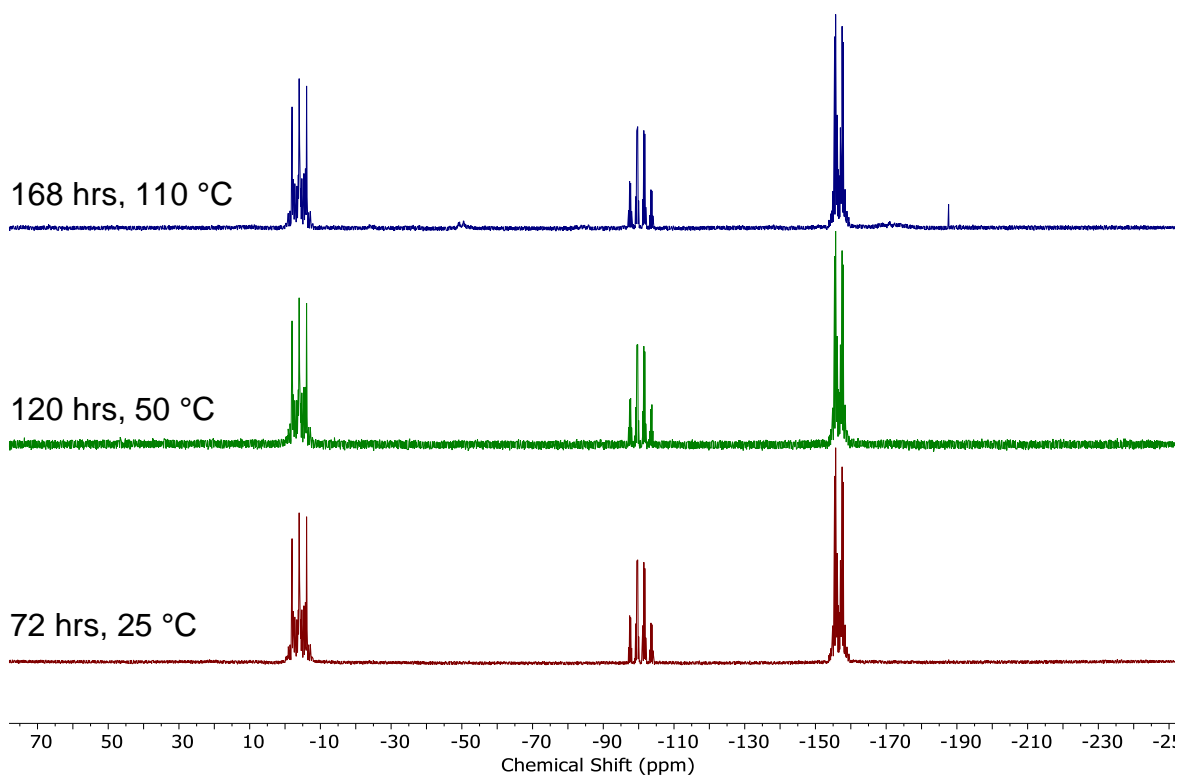

**Figure S20.** Stacked  $^{31}\text{P}$  NMR spectrum ( $\text{C}_6\text{D}_6$ ) of **2** after prolonged heating.

In order to study if **2** would undergo retro-hydroboration at elevated temperatures, 30 mg of **2** was dissolved in 0.5 mL toluene- $d_8$ , the sample was heated in the

spectrometer to 100 °C and  $^1\text{H}$ ,  $^{11}\text{B}$  and  $^{31}\text{P}$  analysis recorded, the temperature was maintained for two hours and analysis recorded again. No changes in the NMR spectrum were observed indicating that retrohydroboration does not occur in solution.

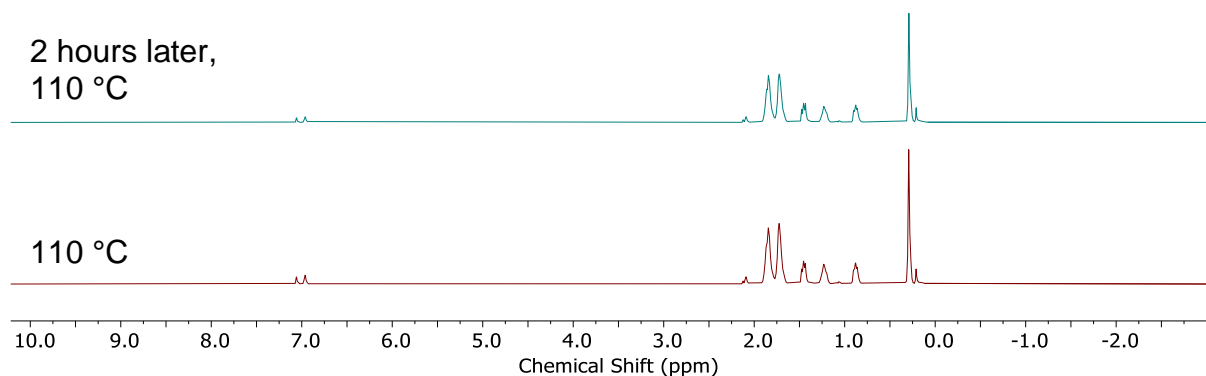

**Figure S21.** Stacked  $^1\text{H}$  NMR spectrum ( $\text{toluene-}d_8$ ) of **2** at  $110\text{ }^\circ\text{C}$ .

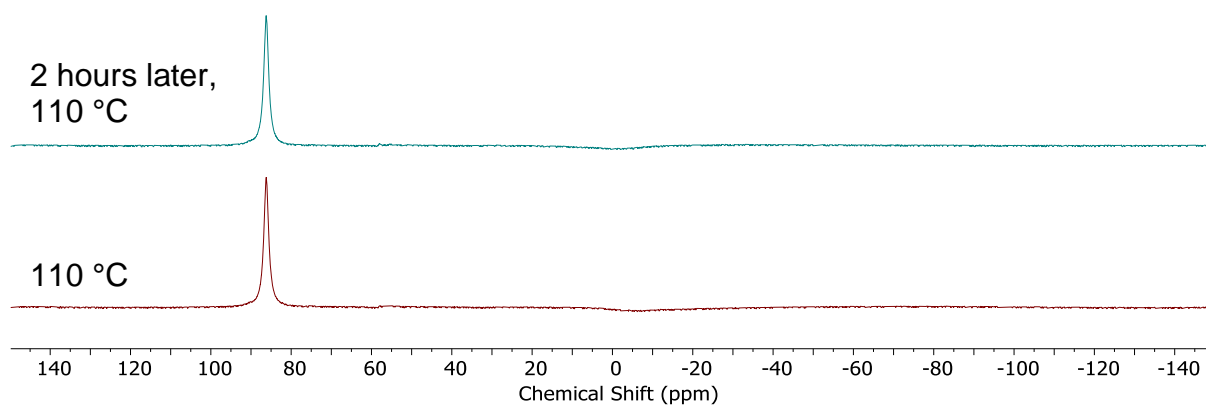

**Figure S22.** Stacked  $^{11}\text{B}$  NMR spectrum ( $\text{toluene-}d_8$ ) of **2** at  $110\text{ }^\circ\text{C}$ .

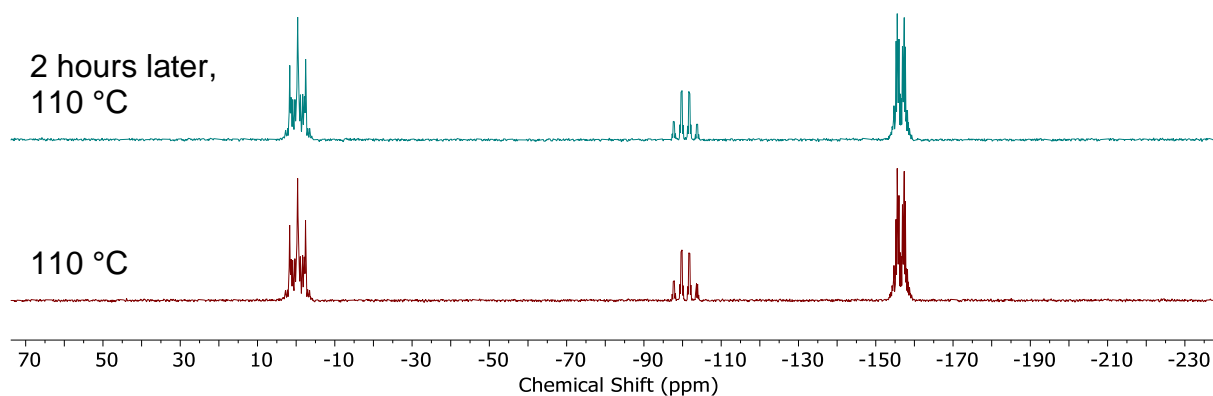

**Figure S23.** Stacked  $^{31}\text{P}$  NMR spectrum ( $\text{toluene-}d_8$ ) of **2** at  $110\text{ }^\circ\text{C}$ .

### 3. Lewis Acidity Examination

#### 3.1. Gutmann-Beckett Test of **2** and **3**

The Gutmann-Beckett method assess Lewis acidity by complexation of Et<sub>3</sub>PO to the Lewis acid and the difference in the <sup>31</sup>P NMR chemical shift of Et<sub>3</sub>PO and complexed Et<sub>3</sub>PO. From this, a scale of Acceptor Number (AN) is generated, where the larger the AN the higher the Lewis acidity; the formula to calculate this is shown in Equation 1.<sup>9</sup> To ensure complexation we used 10 equivalents of Et<sub>3</sub>PO per Lewis acidic site and we compared the AN of **2** and **3**.

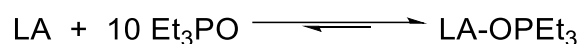

**Scheme S6.** Complexation of Et<sub>3</sub>PO to the Lewis Acid.

$$\text{AN} = 2.21 \times (\delta_{\text{P(LA-OPEt}_3)} - 41) \text{ Eqn(1).}$$

**Table 1.** Determination of Acceptor Number (AN) for **2** and **3**.

| Compound | Solvent                       | $\delta_{\text{P(LA-OPEt}_3)}$ / ppm | Acceptor Number (AN) |
|----------|-------------------------------|--------------------------------------|----------------------|
| <b>2</b> | C <sub>6</sub> D <sub>6</sub> | 62.15                                | 46.74                |
| <b>3</b> | C <sub>6</sub> D <sub>6</sub> | 62.08                                | 46.59                |

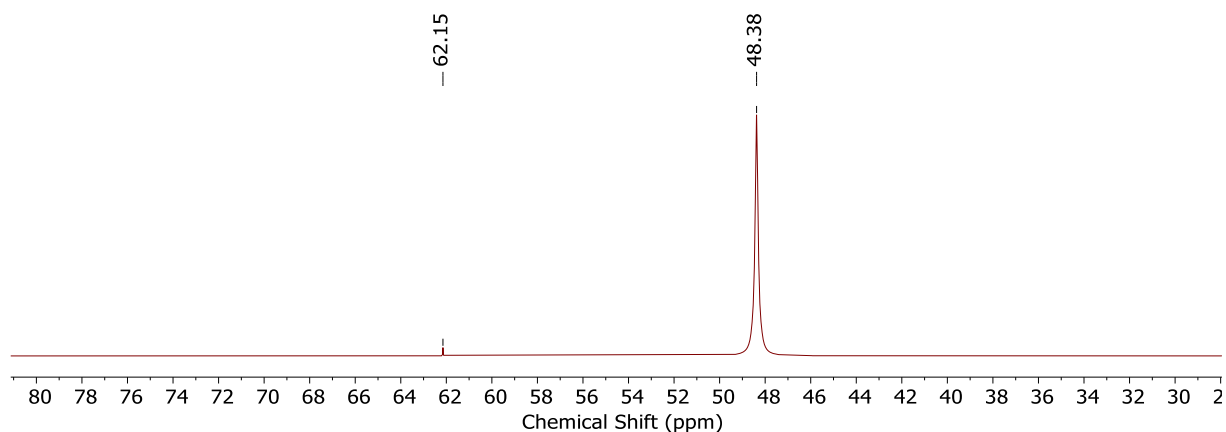

**Figure S24.** <sup>31</sup>P NMR spectrum (C<sub>6</sub>D<sub>6</sub>) of **2** + 30 equivalents Et<sub>3</sub>PO.

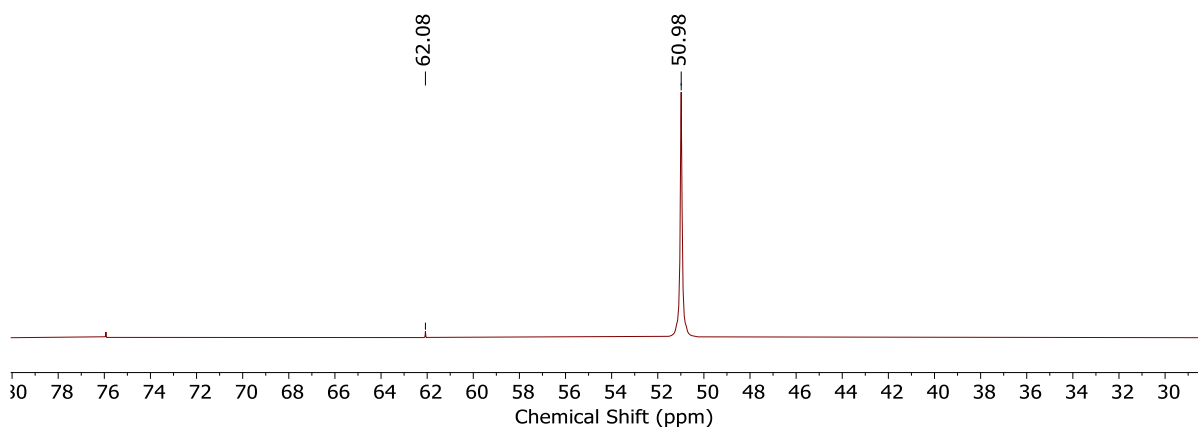

**Figure S25.**  $^{31}\text{P}$  NMR spectrum ( $\text{C}_6\text{D}_6$ ) of **3** + 10 equivalents  $\text{Et}_3\text{PO}$ .

### 3.2. Fluoride Ion Affinity (FIA)

The Lewis acidity of selected Lewis acids was probed by calculation of its Fluoride Ion Affinity (FIA) using the  $\text{CF}_2\text{O}-\text{CF}_3\text{O}^-$  reference system (also known as Christie's method).<sup>10</sup> This method has been extensively used in literature using the BP86/SV(p) level of theory. The calculated FIA of  $\text{B}(\text{C}_6\text{F}_5)_3$ ,  $\text{SbF}_5$  and  $\text{Me}_3\text{Si}^+$  are consistent with literature values and used as benchmarks.<sup>11</sup>

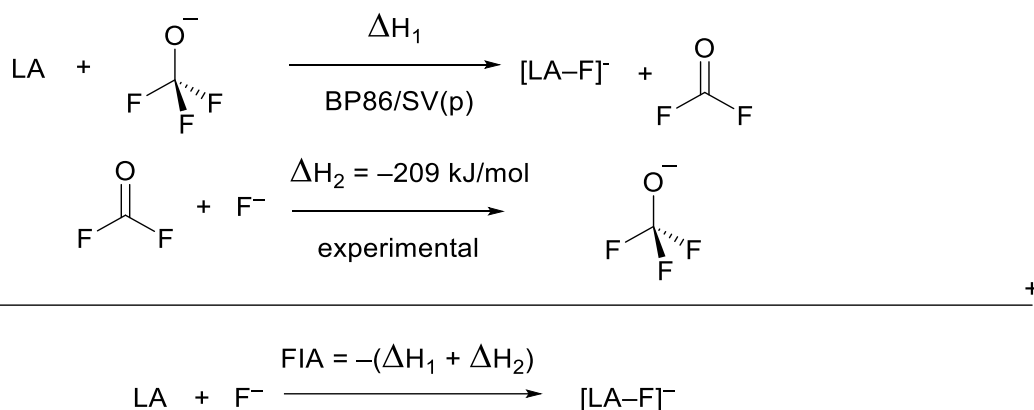

**Scheme S7.** FIA calculation.

**Table S2.** FIA values of selected Lewis Acids and **2** and **3**.

| Compound                                                                                                                           | FIA (kJ/mol) |
|------------------------------------------------------------------------------------------------------------------------------------|--------------|
| $\text{B}(\text{C}_6\text{F}_5)_3$                                                                                                 | 444          |
| $\text{SbF}_5$                                                                                                                     | 489          |
| $[\text{Me}_3\text{Si}]^+$                                                                                                         | 948          |
| $(\{9\text{-BBN}\}\text{CH}_2\text{CH}_2\text{SiMe}_2)_3(\text{P}_7)$ ( <b>2</b> )                                                 | 350          |
| $[(\{9\text{-BBN}\}\text{CH}_2\text{CH}_2\text{SiMe}_2)_2(\{9\text{-BBN}\}\text{CH}_2\text{CH}_2\text{FSiMe}_2)(\text{P}_7)]^-$    | 220          |
| $[(\{9\text{-BBN}\}\text{CH}_2\text{CH}_2\text{SiMe}_2)(\{9\text{-BBN}\}\text{CH}_2\text{CH}_2\text{FSiMe}_2)_2(\text{P}_7)]^{2-}$ | 113          |

|                                                                          |     |
|--------------------------------------------------------------------------|-----|
| ClSiMe <sub>2</sub> CH <sub>2</sub> CH <sub>2</sub> (9-BBN) ( <b>3</b> ) | 340 |
| H-BBN                                                                    | 328 |
| (H-BBN) <sub>2</sub>                                                     | 327 |

**Table S3.** Computed FIA of selected Lewis Acids and **2** and **3**.

| Compound                                                                                                                                                               | E [a.u.]     | G [a.u.]     |
|------------------------------------------------------------------------------------------------------------------------------------------------------------------------|--------------|--------------|
| CF <sub>2</sub> O                                                                                                                                                      | -312.7854163 | -312.76742   |
| [CF <sub>3</sub> O] <sup>-</sup>                                                                                                                                       | -412.6141114 | -412.594474  |
| B(C <sub>6</sub> F <sub>5</sub> ) <sub>3</sub>                                                                                                                         | -2206.628214 | -2206.448141 |
| [FB(C <sub>6</sub> F <sub>5</sub> ) <sub>3</sub> ] <sup>-</sup>                                                                                                        | -2306.547159 | -2306.364788 |
| SbF <sub>5</sub>                                                                                                                                                       | -6814.717684 | -6814.698435 |
| [SbF <sub>6</sub> ] <sup>-</sup>                                                                                                                                       | -6914.652886 | -6914.631992 |
| [Me <sub>3</sub> Si] <sup>+</sup>                                                                                                                                      | -408.8174622 | -408.70319   |
| Me <sub>3</sub> SiF                                                                                                                                                    | -508.9311529 | -508.81189   |
| ({9-BBN}CH <sub>2</sub> CH <sub>2</sub> SiMe <sub>2</sub> ) <sub>3</sub> (P <sub>7</sub> ) ( <b>2</b> )                                                                | -4746.14535  | -4745.07617  |
| [({9-BBN}CH <sub>2</sub> CH <sub>2</sub> SiMe <sub>2</sub> ) <sub>2</sub> ({9-BBN}FCH <sub>2</sub> CH <sub>2</sub> SiMe <sub>2</sub> )(P <sub>7</sub> )] <sup>-</sup>  | -4846.02792  | -4844.95702  |
| [({9-BBN}CH <sub>2</sub> CH <sub>2</sub> SiMe <sub>2</sub> )({9-BBN}FCH <sub>2</sub> CH <sub>2</sub> SiMe <sub>2</sub> ) <sub>2</sub> (P <sub>7</sub> )] <sup>2-</sup> | -4945.85997  | -4944.78814  |
| [({9-BBN}CH <sub>2</sub> CH <sub>2</sub> FSiMe <sub>2</sub> ) <sub>3</sub> (P <sub>7</sub> )] <sup>3-</sup>                                                            | -5045.65104  | -5044.57845  |
| ClSiMe <sub>2</sub> CH <sub>2</sub> CH <sub>2</sub> (9-BBN) ( <b>3</b> )                                                                                               | -1245.82099  | -1245.47052  |
| [ClSiMe <sub>2</sub> CH <sub>2</sub> CH <sub>2</sub> F(9-BBN)] <sup>-</sup>                                                                                            | -1345.69957  | -1345.34757  |
| H-BBN                                                                                                                                                                  | -338.46179   | -338.24158   |
| [H-FBBN] <sup>-</sup>                                                                                                                                                  | -438.33644   | -438.11413   |
| (H-BBN) <sub>2</sub>                                                                                                                                                   | -676.97627   | -676.52912   |

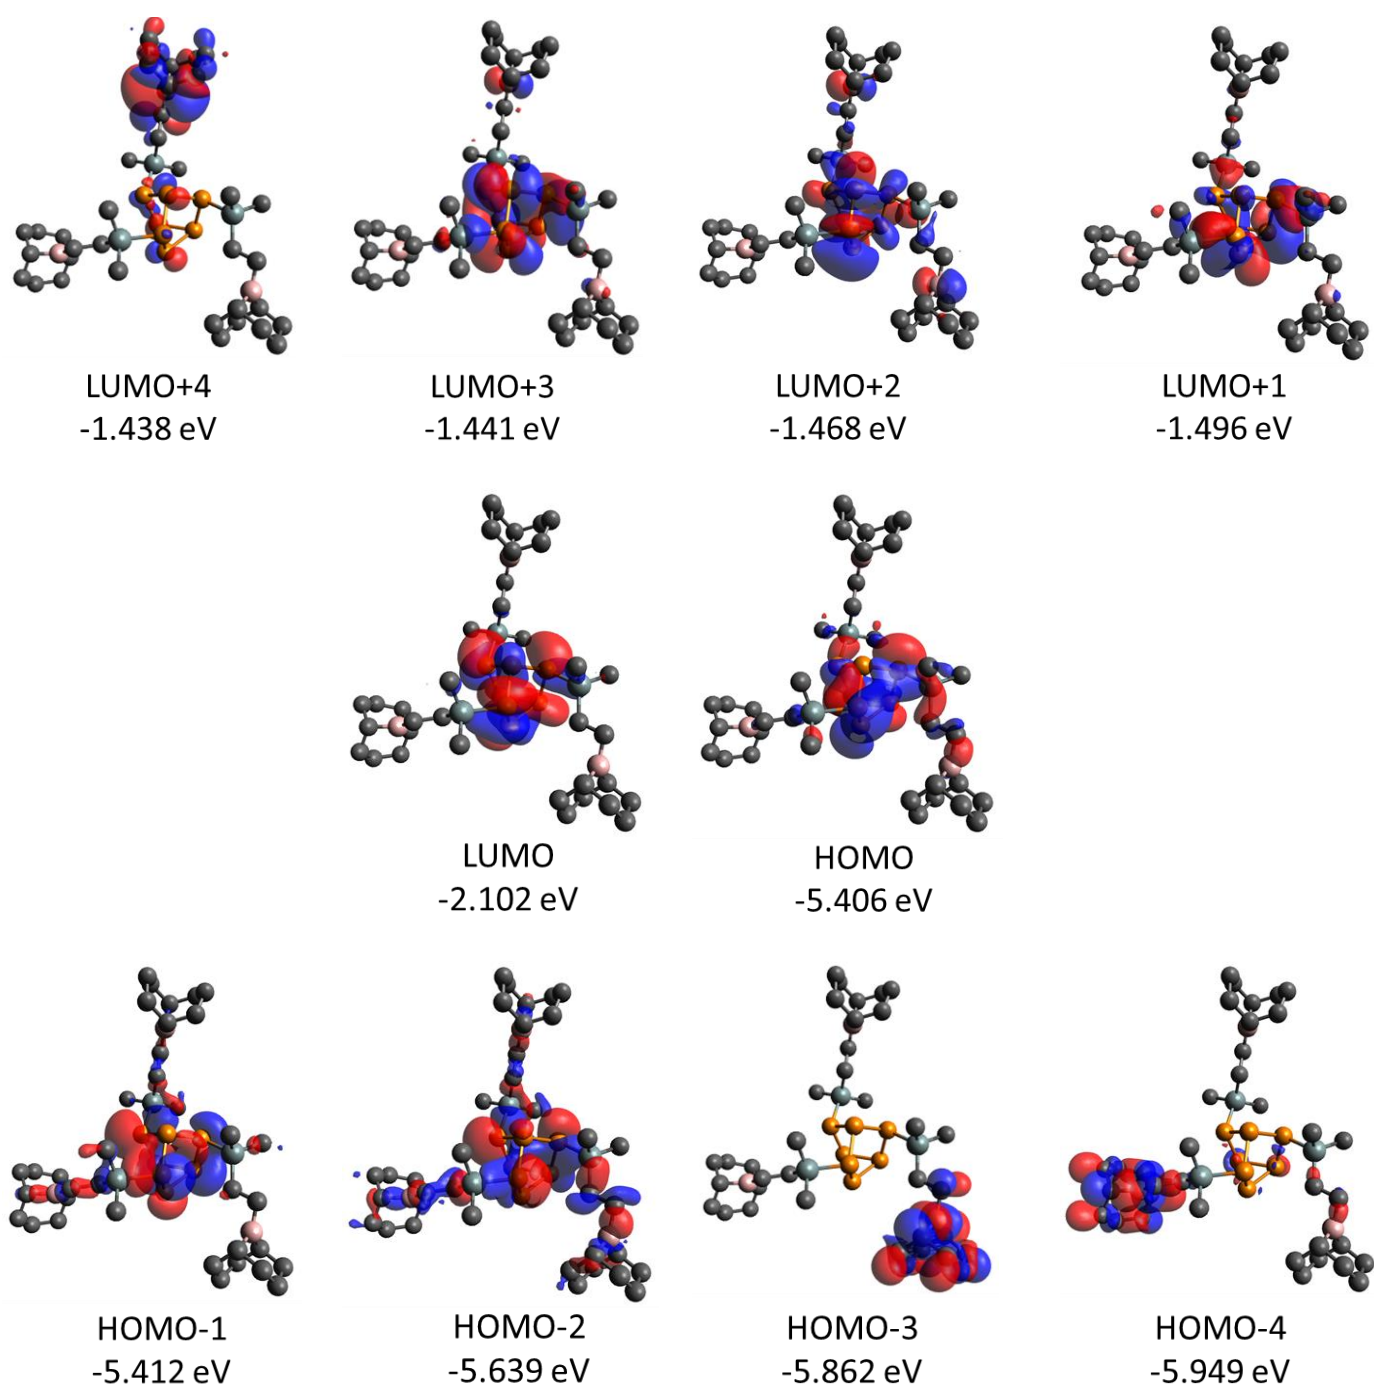

**Figure S26.** HOMO and LUMO Kohn-Sham images of **2**.

#### 4. General Procedure for Hydroboration

Catalyst **2** (4.2 mg, 5 mol%) was dissolved in 0.5 mL  $C_6D_6$  or THF and transferred to a J Young NMR tube. One (14.5  $\mu$ L, 0.1 mmol) or two (29  $\mu$ L, 0.2 mmol) equivalents of pinacol borane (HB(pin)) and substrate (0.1 mmol) were subsequently added via

microsyringe. The reaction progress was monitored by  $^1\text{H}$  and  $^{11}\text{B}$  NMR spectroscopy and conversion was determined by  $^1\text{H}$  NMR spectroscopy based on the ratio of reagent and the target hydroborated product or using toluene (10.7  $\mu\text{L}$ , 0.1 mmol, 1 equivalent) as an internal standard. The NMR resonance used to determine conversion is underlined under the substrate characterization data. Isolated yields were obtained by the removal of volatiles under reduced pressure, followed by extraction in cold ( $-20\text{ }^\circ\text{C}$ ) pentane and filtration.

Integrations for aromatic signals in the  $^1\text{H}$  NMR spectra were on occasion difficult to assign to crude compounds due to a mixture of hydroborated product, substrate and toluene internal standard. All key assignments have successfully been made.

## 5. Screening Catalytic Conditions

### 5.1. Temperature and Solvent Screening

We examined hydroboration of a wide variety of substrate functional groups in both  $\text{C}_6\text{D}_6$  and THF at  $25\text{ }^\circ\text{C}$ ,  $50\text{ }^\circ\text{C}$  and  $110\text{ }^\circ\text{C}$ . Reactions were prepared and monitored according to the general procedure for hydroboration described in section 4. In general, higher reactivity was observed in  $\text{C}_6\text{D}_6$  compared to THF.

**Table S4.** Solvent and Temperature Screening, Catalyst Loading = 5 mol%.

| Entry | Substrate                                                                                        | Product                                                                                          | Solvent                | <i>t</i> (h) | T ( $^\circ\text{C}$ ) | Conv. (%) <sup>[a]</sup> |
|-------|--------------------------------------------------------------------------------------------------|--------------------------------------------------------------------------------------------------|------------------------|--------------|------------------------|--------------------------|
| 1     | 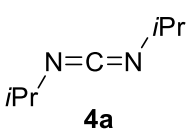<br><b>4a</b> | <br><b>4b</b> | $\text{C}_6\text{D}_6$ | 12           | 25                     | 92                       |
| 2     |                                                                                                  |                                                                                                  | $\text{C}_6\text{D}_6$ | 2            | 50                     | >99 (91)                 |
| 3     |                                                                                                  |                                                                                                  | THF                    | 12           | 25                     | 70                       |
| 4     |                                                                                                  |                                                                                                  | THF                    | 2            | 50                     | 95 (90)                  |
| 5     | <br><b>5a</b> | <br><b>5b</b> | $\text{C}_6\text{D}_6$ | 18           | 25                     | 0                        |
| 6     |                                                                                                  |                                                                                                  | $\text{C}_6\text{D}_6$ | 72           | 50                     | 43                       |
| 7     |                                                                                                  |                                                                                                  | $\text{C}_6\text{D}_6$ | 22           | 110                    | 21                       |
| 8     |                                                                                                  |                                                                                                  | THF                    | 18           | 25                     | 0                        |
| 9     |                                                                                                  |                                                                                                  | THF                    | 72           | 50                     | 18                       |
| 10    |                                                                                                  |                                                                                                  | THF                    | 22           | 110                    | 12                       |
| 11    | <br><b>6a</b> |                                                                                                  | $\text{C}_6\text{D}_6$ | 18           | 25                     | 0                        |
| 12    |                                                                                                  |                                                                                                  | $\text{C}_6\text{D}_6$ | 40           | 50                     | 0                        |
| 13    |                                                                                                  |                                                                                                  | $\text{C}_6\text{D}_6$ | 15           | 110                    | 91                       |

|    |  |  |                               |     |     |    |
|----|--|--|-------------------------------|-----|-----|----|
| 14 |  |  | THF                           | 18  | 25  | 0  |
| 15 |  |  | THF                           | 40  | 50  | 0  |
| 16 |  |  | THF                           | 15  | 110 | 20 |
| 17 |  |  | C <sub>6</sub> D <sub>6</sub> | 24  | 25  | 0  |
| 18 |  |  | C <sub>6</sub> D <sub>6</sub> | 48  | 50  | 0  |
| 19 |  |  | C <sub>6</sub> D <sub>6</sub> | 72  | 110 | 80 |
| 20 |  |  | THF                           | 24  | 25  | 0  |
| 21 |  |  | THF                           | 48  | 50  | 0  |
| 22 |  |  | THF                           | 72  | 110 | 16 |
| 23 |  |  | C <sub>6</sub> D <sub>6</sub> | 18  | 25  | 0  |
| 24 |  |  | C <sub>6</sub> D <sub>6</sub> | 112 | 50  | 78 |
| 25 |  |  | THF                           | 18  | 25  | 0  |
| 26 |  |  | THF                           | 112 | 50  | 61 |
| 27 |  |  | C <sub>6</sub> D <sub>6</sub> | 18  | 25  | 0  |
| 28 |  |  | C <sub>6</sub> D <sub>6</sub> | 40  | 50  | 0  |
| 29 |  |  | C <sub>6</sub> D <sub>6</sub> | 72  | 110 | 84 |
| 30 |  |  | THF                           | 18  | 25  | 0  |
| 31 |  |  | THF                           | 40  | 50  | 0  |
| 32 |  |  | THF                           | 72  | 110 | 26 |

[a] Conversion determined by <sup>1</sup>H NMR spectroscopy. Yields of the isolated product are given within parentheses.

[b] The hydroboration of isocyanates also led to the detectable formation product interactions with **2**, see section 7 for more information. The conversions stated are for the conversion to free **5b**. [c] Two equivalents HB(pin) added.

## 5.2. HB(pin) equivalents

We investigated the possibility of double hydroboration and hydrodeoxygenation/hydrodenitrogenation reactions. Our results showed that no double hydroboration of di-isopropylcarbodiimide (**4a**) or phenyl acetylene (**8a**) could be observed after 5 days at 110 °C. Under similar conditions, no deoxygenations of acetophenone (**6a**) was observed. However, with two or three equivalents of HB(pin) at either 50 °C or 110 °C we observed bis-hydroboration and hydrodeoxygenation of phenyl isocyanate PhNCO (**5a**).



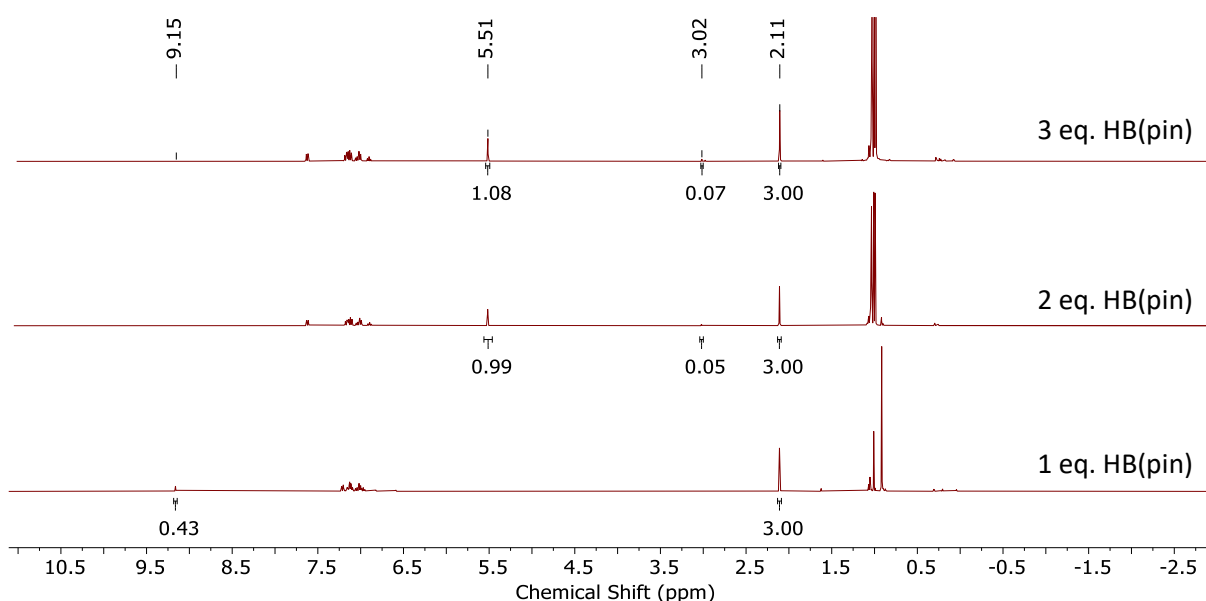

**Figure S27.** Stacked  $^1\text{H}$  NMR spectra in  $\text{C}_6\text{D}_6$  of phenylisocyanate (**16a**) hydroboration with one, two and three equivalents of HB(pin) respectively at 50 °C after 48 hours.  $\delta$  9.15 ppm =  $\text{PhN}(\text{B}(\text{pin}))\text{CHO}$  (1H, **5b**);  $\delta$  5.51 ppm =  $\text{PhN}(\text{B}(\text{pin}))\text{CH}_2\text{O}(\text{B}(\text{pin}))$  (2H, **5c**);  $\delta$  3.02 ppm =  $\text{PhN}(\text{B}(\text{pin}))\text{CH}_3$  (3H, **5d**);  $\delta$  2.11 ppm = toluene internal standard resonance.

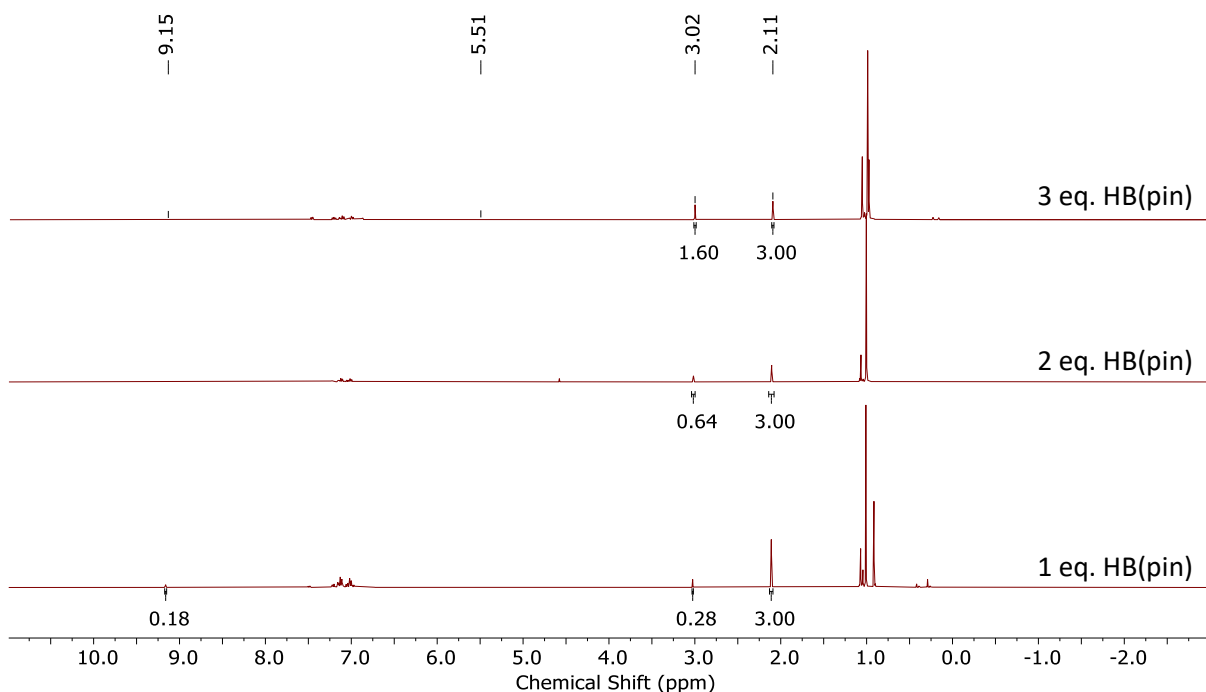

**Figure S28.** Stacked  $^1\text{H}$  NMR spectra in  $\text{C}_6\text{D}_6$  of phenylisocyanate (**16a**) hydroboration with one, two and three equivalents of HB(pin) respectively at 110 °C after 48 hours.  $\delta$  9.15 ppm =  $\text{PhN}(\text{B}(\text{pin}))\text{CHO}$  (1H, **5b**);  $\delta$  5.51 ppm =

PhN(B(pin))CH<sub>2</sub>O(B(pin)) (2H, **5c**);  $\delta$  3.02 ppm = PhN(B(pin))CH<sub>3</sub> (3H, **5d**);  $\delta$  2.11 ppm = toluene internal standard resonance.

### 5.3. Role of the Cluster in Catalysis

In order to investigate the role of the cluster in catalysis we investigated both the untethered chlorosilane **3** and (Me<sub>3</sub>Si)<sub>3</sub>(P)<sub>7</sub> as a hydroboration catalyst. (Me<sub>3</sub>Si)<sub>3</sub>(P)<sub>7</sub> remained inactive towards hydroboration catalysis.

*For the untethered chlorosilane (3);*

To a J Young NMR tube containing 0.4 mL C<sub>6</sub>D<sub>6</sub>, 0.1 mL of a stock solution of untethered chlorosilane **3** (21.8 mg in 0.6 mL C<sub>6</sub>D<sub>6</sub>, 15 mol%) was transferred. One equivalent (14.5  $\mu$ L, 0.1 mmol) for **4a–8a** or two equivalents (29  $\mu$ L, 0.2 mmol) for **9a** of pinacol borane (HB(pin)) and one equivalent of substrate (0.1 mmol) were subsequently added via microsyringe.

*For (Me<sub>3</sub>Si)<sub>3</sub>(P)<sub>7</sub>;*

(Me<sub>3</sub>Si)<sub>3</sub>(P)<sub>7</sub> (2.2 mg, 5 mol%) was dissolved in 0.5 mL of C<sub>6</sub>D<sub>6</sub> and transferred to a J Young NMR tube. One equivalent (14.5  $\mu$ L, 0.1 mmol) for **4a–8a** or two equivalents (29  $\mu$ L, 0.2 mmol) for **9a** of pinacol borane (HB(pin)) and one equivalent of substrate (0.1 mmol) were subsequently added via microsyringe.

*Monitoring;*

The catalysis was allowed to proceed under analogous conditions used for catalyst **2** and subsequently monitored by <sup>1</sup>H and <sup>11</sup>B NMR spectroscopy and conversion was determined by <sup>1</sup>H NMR spectroscopy based on the ratio of starting material and the hydroborated product or using toluene (10.7  $\mu$ L, 0.1 mmol, 1 equivalent) as an internal standard. <sup>29</sup>Si{<sup>1</sup>H} and <sup>31</sup>P{<sup>1</sup>H} was used to confirm that **3** and (Me<sub>3</sub>Si)<sub>3</sub>(P)<sub>7</sub> do not decompose during the catalysis.

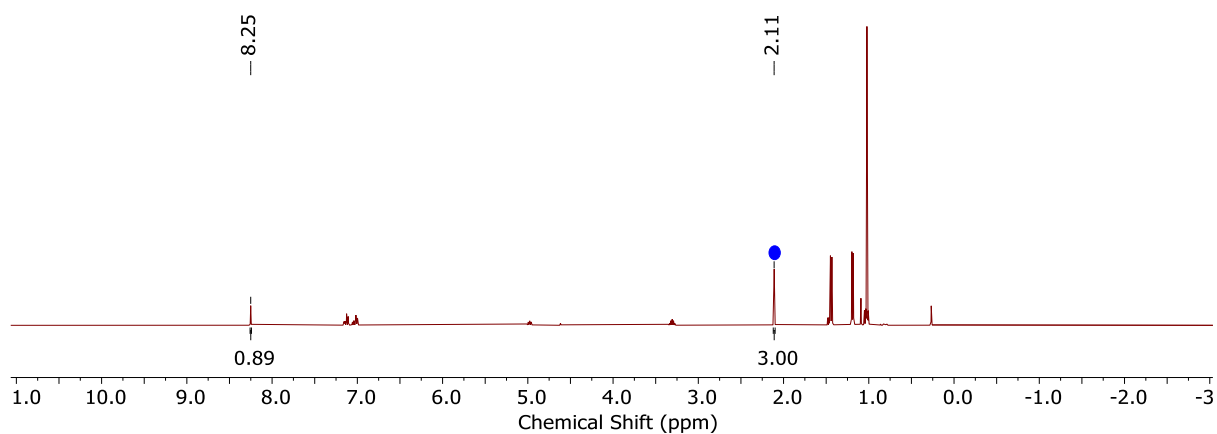

**Figure S29.**  $^1\text{H}$  NMR spectrum ( $\text{C}_6\text{D}_6$ ) of crude **4a**, catalyzed by  $\text{ClSiMe}_2\text{CH}_2\text{CH}_2(9\text{-BBN})$  (**3**). • = toluene internal standard resonance.

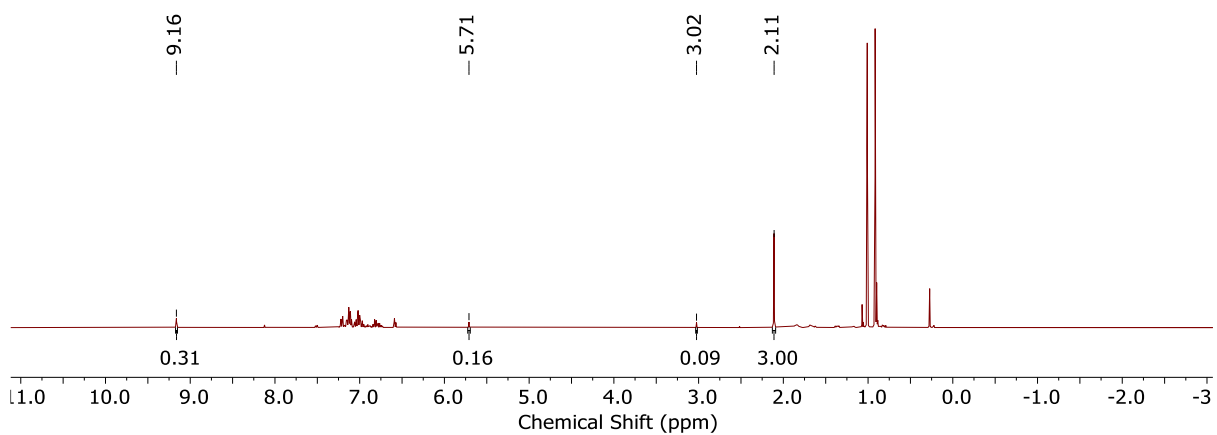

**Figure S30.**  $^1\text{H}$  NMR spectrum ( $\text{C}_6\text{D}_6$ ) of crude **5a**, catalyzed by  $\text{ClSiMe}_2\text{CH}_2\text{CH}_2(9\text{-BBN})$  (**3**).  $\delta$  9.16 ppm =  $\text{PhN}(\text{B}(\text{pin}))\text{CHO}$  (1H, **5b**);  $\delta$  5.71 ppm =  $\text{PhN}(\text{B}(\text{pin}))\text{CH}_2\text{O}(\text{B}(\text{pin}))$  (2H, **5c**);  $\delta$  3.02 ppm =  $\text{PhN}(\text{B}(\text{pin}))\text{CH}_3$  (3H, **5d**); • = toluene internal standard resonance.

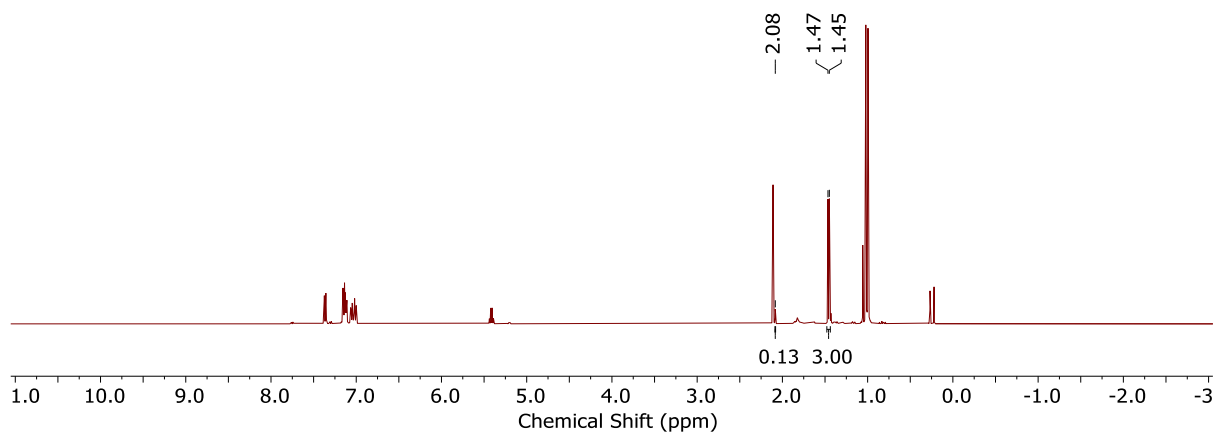

**Figure S31.**  $^1\text{H}$  NMR spectrum ( $\text{C}_6\text{D}_6$ ) of crude **6a**, catalyzed by  $\text{ClSiMe}_2\text{CH}_2\text{CH}_2(9\text{-BBN})$  (**3**). ● = unreacted start material used to determine conversion.

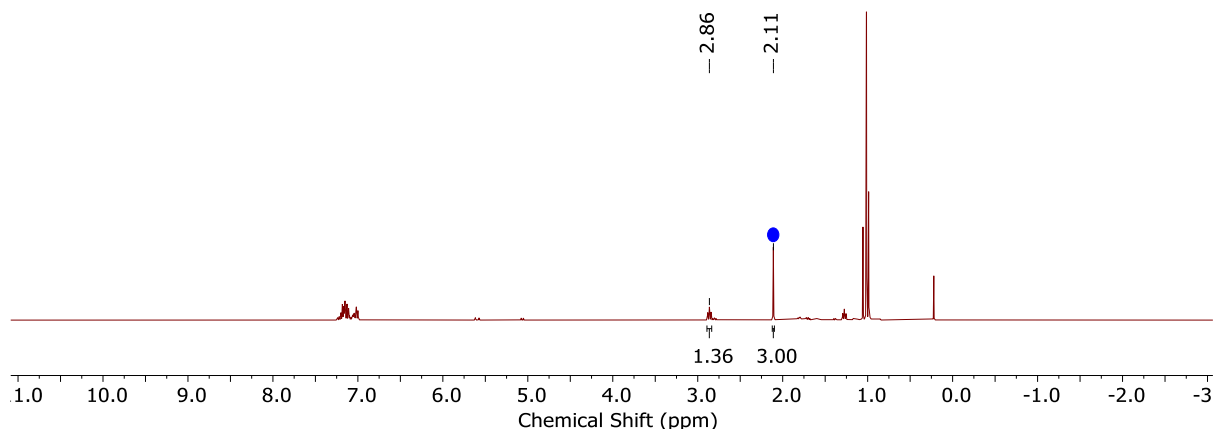

**Figure S32.**  $^1\text{H}$  NMR spectrum ( $\text{C}_6\text{D}_6$ ) of crude **7a**, catalyzed by  $\text{ClSiMe}_2\text{CH}_2\text{CH}_2(9\text{-BBN})$  (**3**). ● = toluene internal standard resonance.

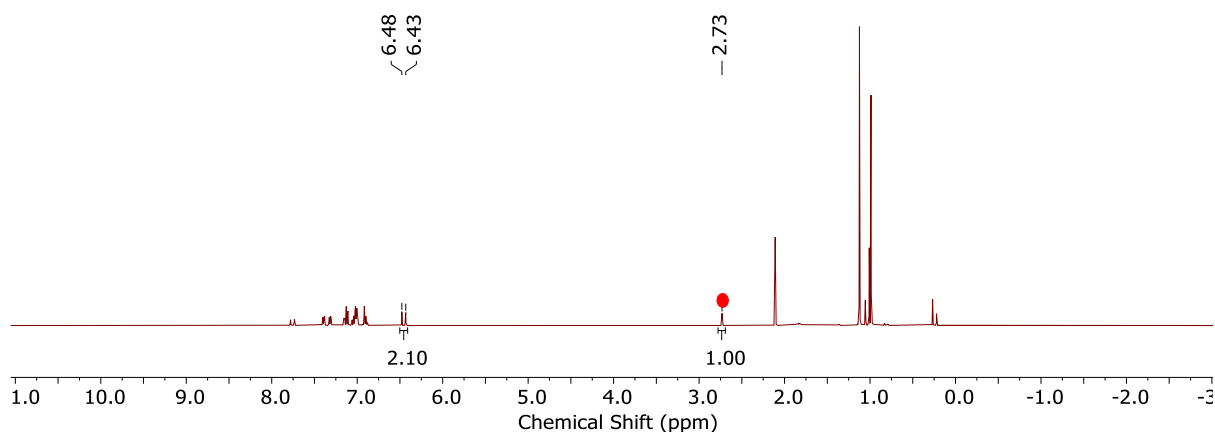

**Figure S33.**  $^1\text{H}$  NMR spectrum ( $\text{C}_6\text{D}_6$ ) of crude **8a**, catalyzed by  $\text{ClSiMe}_2\text{CH}_2\text{CH}_2(9\text{-BBN})$  (**3**). ● = unreacted start material used to determine conversion.

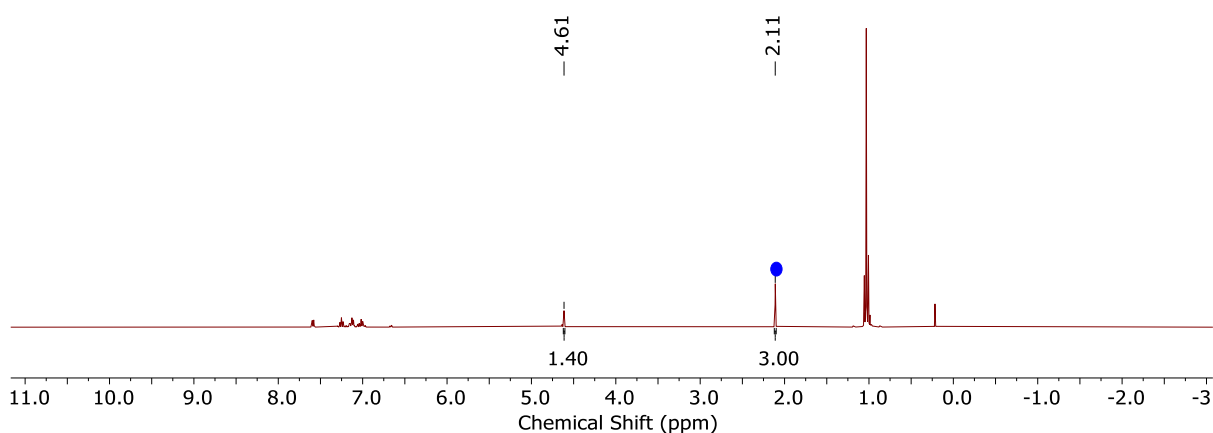

**Figure S34.**  $^1\text{H}$  NMR spectrum ( $\text{C}_6\text{D}_6$ ) of crude **9a**, catalyzed by  $\text{ClSiMe}_2\text{CH}_2\text{CH}_2(9\text{-BBN})$  (**3**). ● = toluene internal standard resonance.

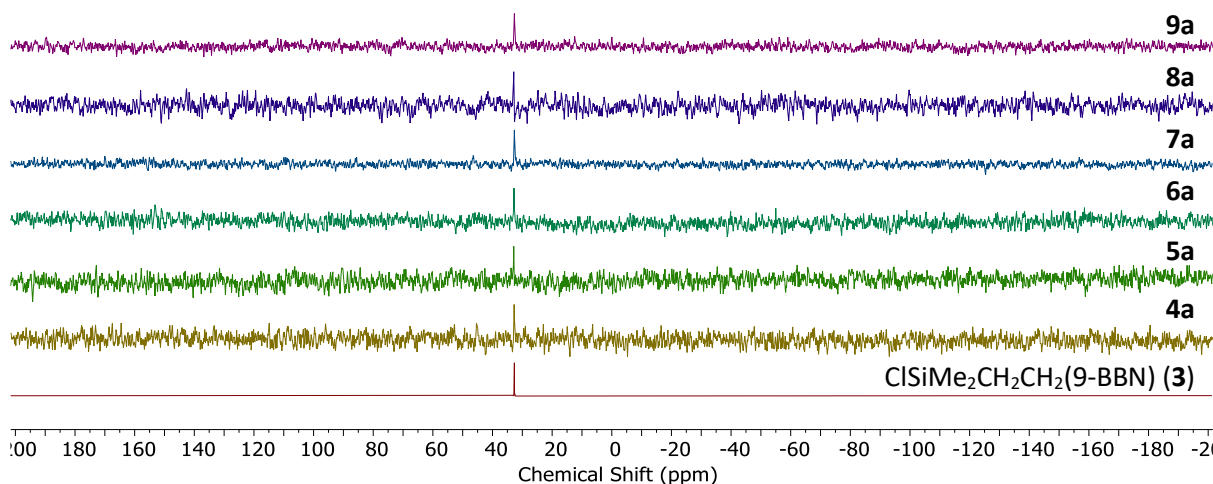

**Figure S35.**  $^{29}\text{Si}\{^1\text{H}\}$  NMR spectrum ( $\text{C}_6\text{D}_6$ ) of **3** and after the catalysis of substrates **4a – 9a** confirming that the Si–Cl bond remains intact.  $\delta$  32.66 ppm.

## 6. Characterization Data

### 6.1. Carbodiimides

We validated our analysis of hydroborated carbodiimides by comparison to various literature sources and found all data to be in agreement with those previously reported.<sup>12, 13</sup>

#### 6.1.1. **4b** – N,N'-diisopropyl-N-(4,4,5,5-tetramethyl-1,3,2-dioxaborolan-2-yl)formimidamide

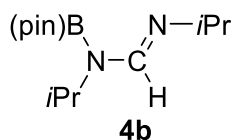

**$^1\text{H}$  NMR (400 MHz, 298 K,  $\text{C}_6\text{D}_6$ ):**  $\delta$  = 8.28 (s, 1H,  $\text{HC}=\text{N}$ ), 5.00 (sept,  $^3J_{\text{HH}}$  = 6.9 Hz, 1H,  $\text{CH}(\text{CH}_3)_2$ ), 3.32 (sept,  $^3J_{\text{HH}}$  = 6.3 Hz, 1H,  $\text{CH}(\text{CH}_3)_2$ ), 1.46 (d,  $^3J_{\text{HH}}$  = 6.9 Hz, 6H,  $\text{CH}(\text{CH}_3)_2$ ), 1.20 (d,  $^3J_{\text{HH}}$  = 6.3 Hz, 6H,  $\text{CH}(\text{CH}_3)_2$ ), 1.02 (s, 12H, Bpin) ppm.

**$^{11}\text{B}$  NMR (128 MHz, 298 K,  $\text{C}_6\text{D}_6$ ):**  $\delta$  = 25.3 (s) ppm.

**$^{13}\text{C}\{^1\text{H}\}$  NMR (101 MHz, 298 K,  $\text{C}_6\text{D}_6$ ):**  $\delta$  = 150.01 (HC=N), 82.75 ( $\text{C}(\text{CH}_3)_2$ ), 57.30 ( $\text{CH}(\text{CH}_3)_2$ ), 43.67 ( $\text{CH}(\text{CH}_3)_2$ ), 25.71 ( $\text{CH}(\text{CH}_3)_2$ ), 24.53 ( $\text{C}(\text{CH}_3)_2$ ), 21.87 ( $\text{CH}(\text{CH}_3)_2$ ) ppm.

**Mass spectrometry (ESI):**  $\text{C}_{13}\text{H}_{27}\text{BN}_2\text{O}_2+\text{H}$  ( $[\text{M}+\text{H}]^+$ ); Calcd. = 255.2238, Found = 255.2238.

Conversion: >99%

Isolated Yield: 91%

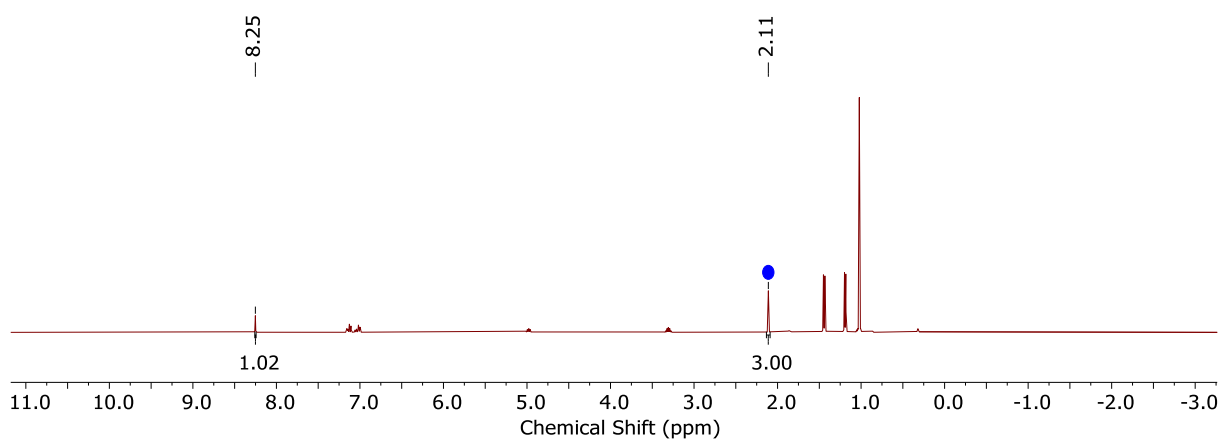

**Figure S36.**  $^1\text{H}$  NMR spectrum ( $\text{C}_6\text{D}_6$ ) of crude **4b**. • = toluene internal standard resonance.

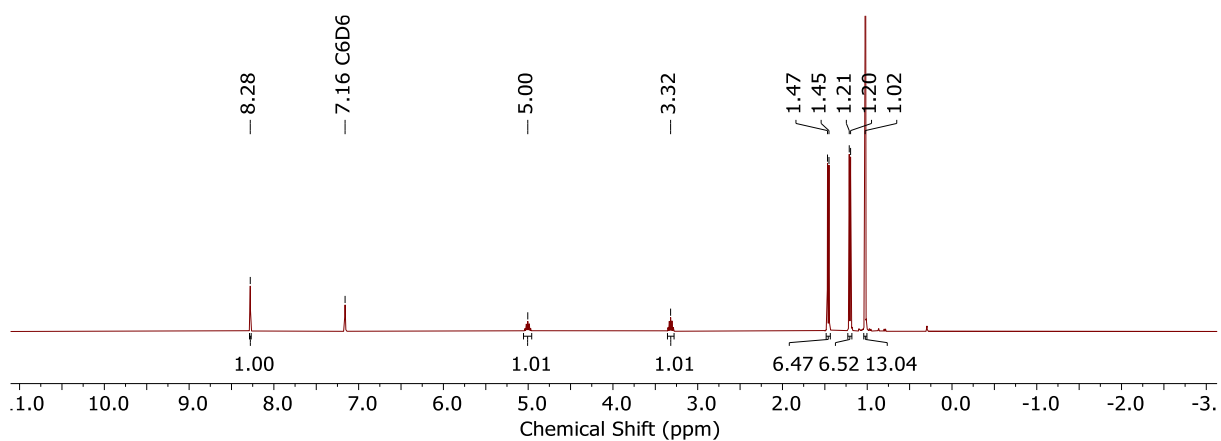

**Figure S37.**  $^1\text{H}$  NMR spectrum ( $\text{C}_6\text{D}_6$ ) of isolated **4b**.

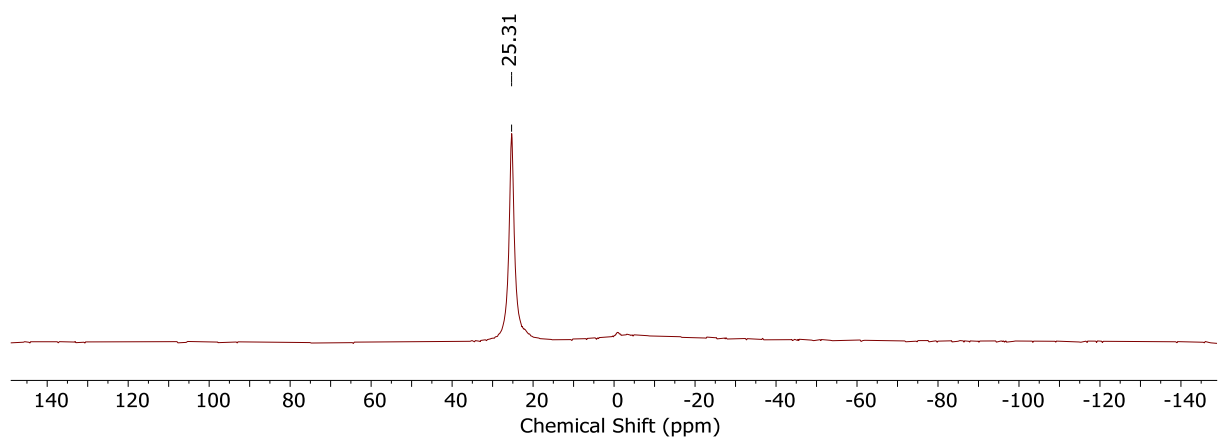

**Figure S38.**  $^{11}\text{B}$  NMR spectrum ( $\text{C}_6\text{D}_6$ ) of isolated **4b**.

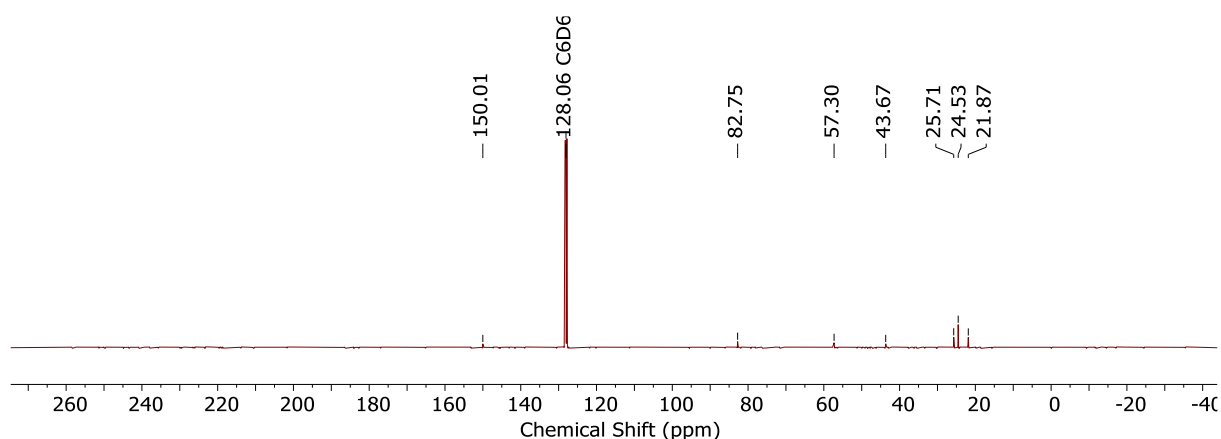

**Figure S39.**  $^{13}\text{C}\{^1\text{H}\}$  NMR spectrum ( $\text{C}_6\text{D}_6$ ) of isolated **4b**.

6.1.2. **10b** – N,N'-dicyclohexyl-N-(4,4,5,5-tetramethyl-1,3,2-dioxaborolan-2-yl)formimidamide

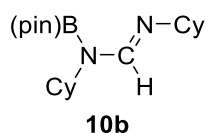

$^1\text{H}$  NMR (400 MHz, 298 K,  $\text{C}_6\text{D}_6$ ):  $\delta = 8.34$  (s, 1H,  $\text{HC}=\text{N}$ ), 4.62 (m, 1H, NCH), 2.99 (m, 1H, NCH), 1.12–1.96 (m, 20H, Cy), 1.05 (s, 12H, Bpin) ppm.

$^{11}\text{B}$  NMR (128 MHz, 298 K,  $\text{C}_6\text{D}_6$ ):  $\delta = 25.4$  (s) ppm.

**Mass spectrometry (ESI):**  $\text{C}_{19}\text{H}_{35}\text{BN}_2\text{O}_2+\text{H}$  ( $[\text{M}+\text{H}]^+$ ); Calcd. = 335.2867, Found = 335.2867.

**Conversion:** 82%

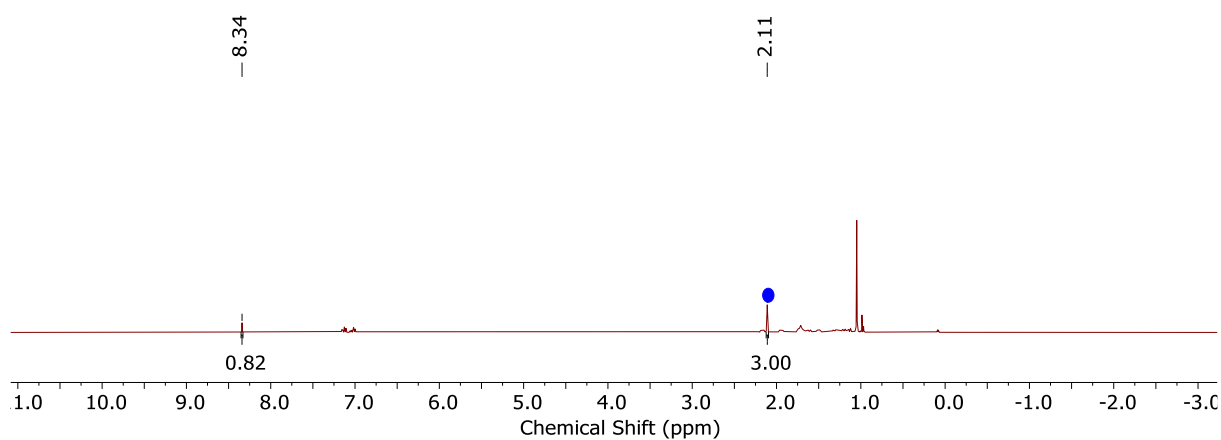

**Figure S40.**  $^1\text{H}$  NMR spectrum ( $\text{C}_6\text{D}_6$ ) of crude **10b**. ● = toluene internal standard resonance.

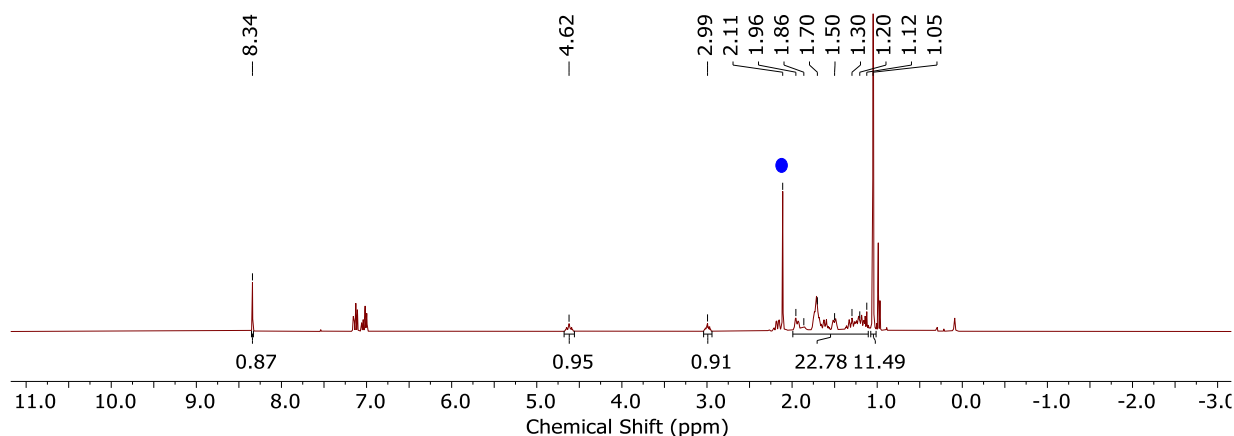

**Figure S41.**  $^1\text{H}$  NMR spectrum ( $\text{C}_6\text{D}_6$ ) of crude **10b**. • = toluene internal standard resonance.

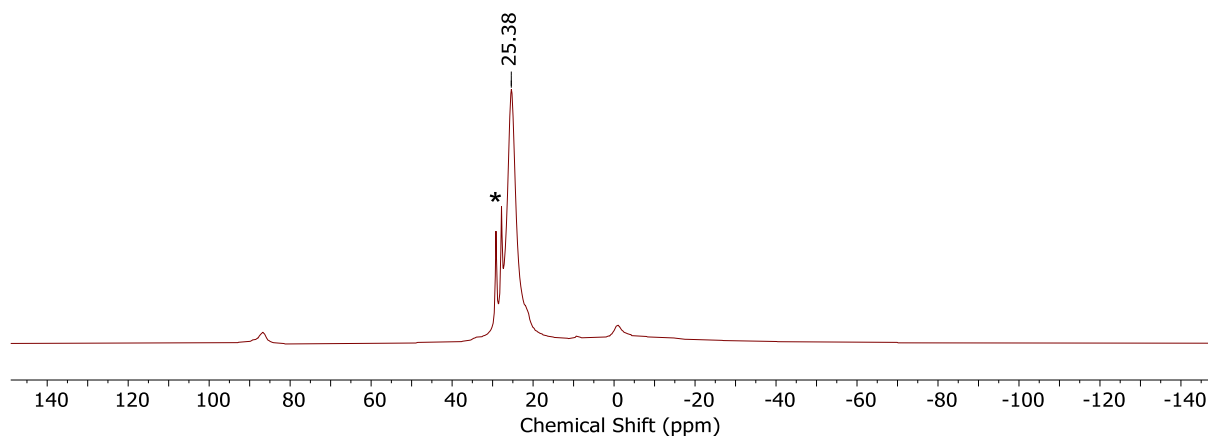

**Figure S42.**  $^{11}\text{B}$  NMR spectrum ( $\text{C}_6\text{D}_6$ ) of crude **10b**. \* = HB(pin).

### 6.1.3. **11b** – N,N'-di-tert-butyl-N-(4,4,5,5-tetramethyl-1,3,2-dioxaborolan-2-yl)formimidamide

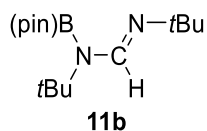

$^1\text{H}$  NMR (400 MHz, 298 K,  $\text{C}_6\text{D}_6$ ):  $\delta$  = 8.34 (s, 1H, HC=N), 1.54 (s, 18H,  $\text{C}(\text{CH}_3)_3$ ), 1.01 (s, 12H, Bpin) ppm.

$^{11}\text{B}$  NMR (128 MHz, 298 K,  $\text{C}_6\text{D}_6$ ):  $\delta$  = 25.5 (s) ppm.

$^{13}\text{C}\{^1\text{H}\}$  NMR (101 MHz, 298 K,  $\text{C}_6\text{D}_6$ ):  $\delta$  = 149.23 (HC=N), 82.19 ( $\text{C}(\text{CH}_3)_2$ ), 55.14 ( $\text{C}(\text{CH}_3)_3$ ), 30.61 ( $\text{C}(\text{CH}_3)_3$ ), 24.48 ( $\text{C}(\text{CH}_3)_2$ ) ppm.



**Mass spectrometry (APCI):**  $C_{15}H_{31}BN_2O_2+H$  ( $[M+H]^+$ ); Calcd. = 283.2551, Found = 283.2552.

**Conversion:** >99%

**Isolated Yield:** 88%

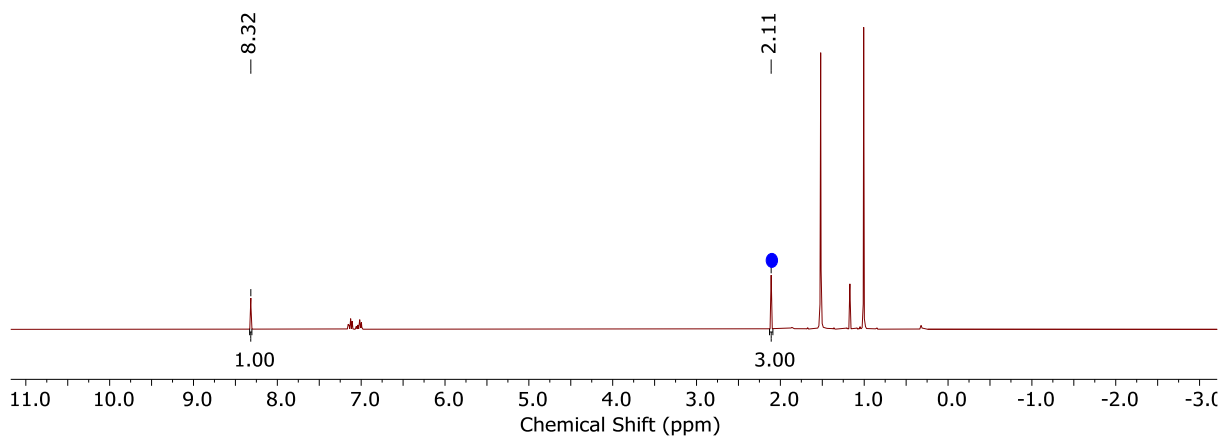

**Figure S43.**  $^1H$  NMR spectrum ( $C_6D_6$ ) of crude **11b**. ● = toluene internal standard resonance.

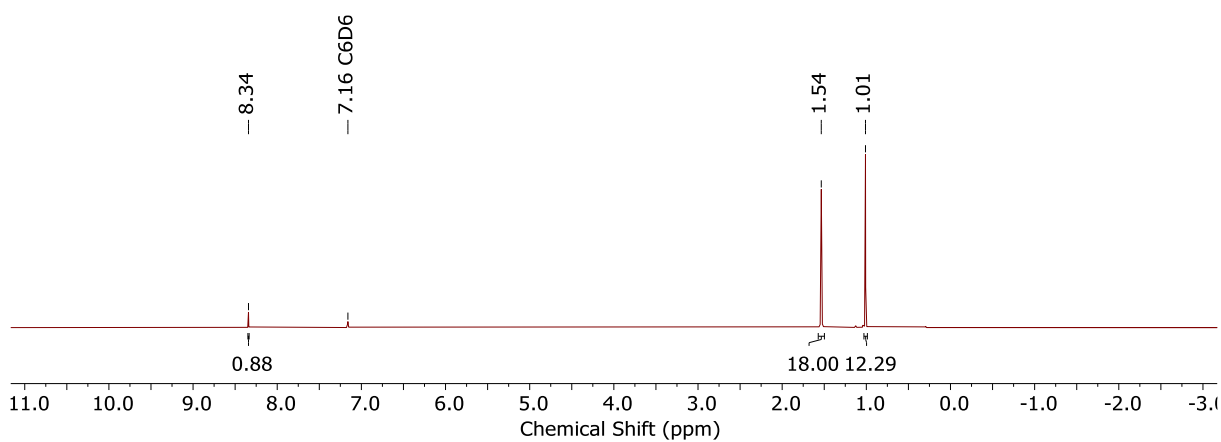

**Figure S44.**  $^1H$  NMR spectrum ( $C_6D_6$ ) of isolated **11b**.

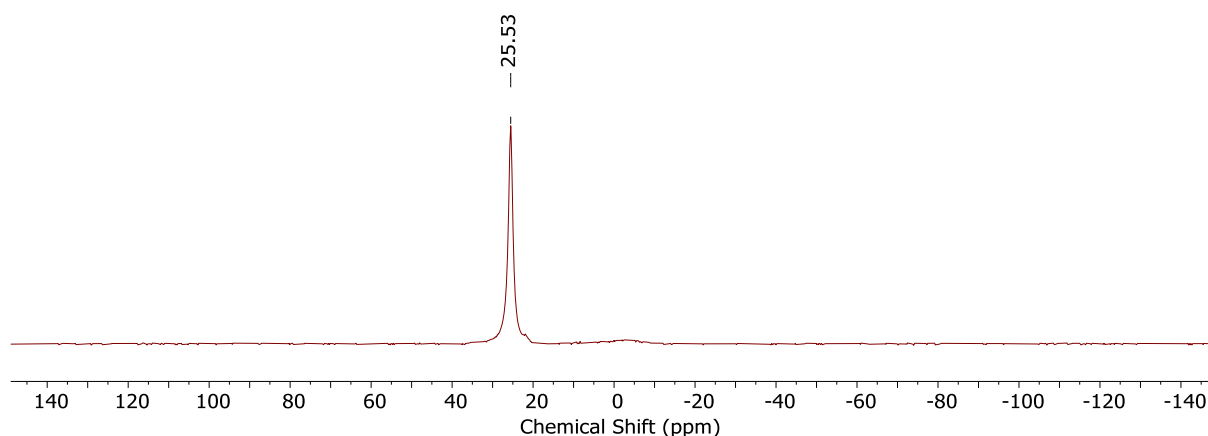

**Figure S45.**  $^{11}\text{B}$  NMR spectrum ( $\text{C}_6\text{D}_6$ ) of isolated **11b**.

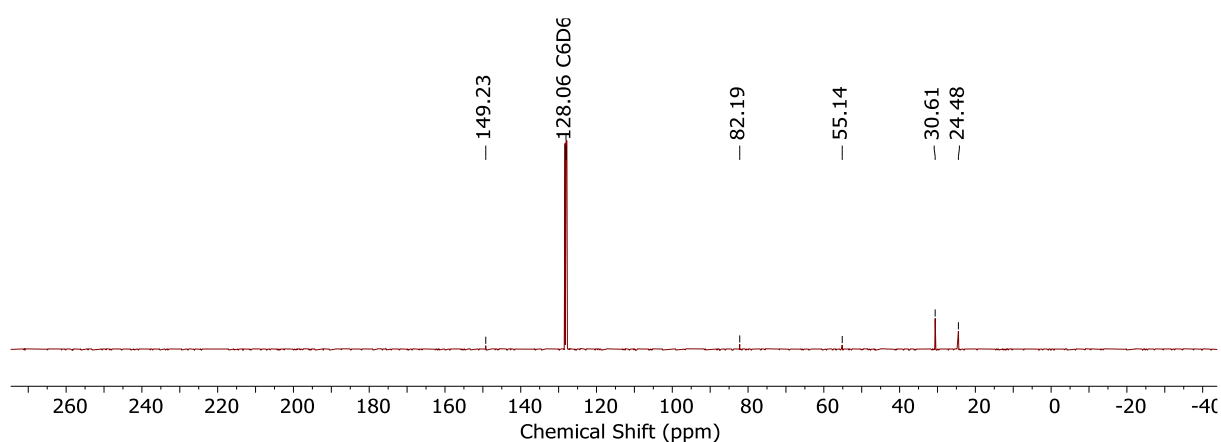

**Figure S46.**  $^{13}\text{C}\{^1\text{H}\}$  NMR spectrum ( $\text{C}_6\text{D}_6$ ) of isolated **11b**.

6.1.4. **12b** – N'-tert-butyl-N-ethyl-N-(4,4,5,5-tetramethyl-1,3,2-dioxaborolan-2-yl)formimidamide

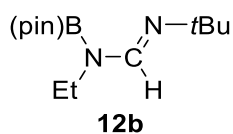

$^1\text{H}$  NMR (400 MHz, 298 K,  $\text{C}_6\text{D}_6$ ):  $\delta$  = 8.19 (s, 1H,  $\text{HC}=\text{N}$ ), 3.80 (q,  $^3J_{\text{HH}} = 6.9$  Hz, 2H,  $\text{CH}_2$ ), 1.34 (t,  $^3J_{\text{HH}} = 6.9$  Hz, 3H,  $\text{CH}_3$ ), 1.22 (s, 9H,  $\text{CH}_3$ ), 1.04 (s, 12H,  $\text{Bpin}$ ) ppm.

$^{11}\text{B}$  NMR (128 MHz, 298 K,  $\text{C}_6\text{D}_6$ ):  $\delta$  = 25.4 (s) ppm.

**Mass spectrometry (APCI):**  $\text{C}_{13}\text{H}_{27}\text{BN}_2\text{O}_2+\text{H}$  ( $[\text{M}+\text{H}]^+$ ); Calcd. = 255.2238, Found = 255.2249.

**Conversion:** 56%

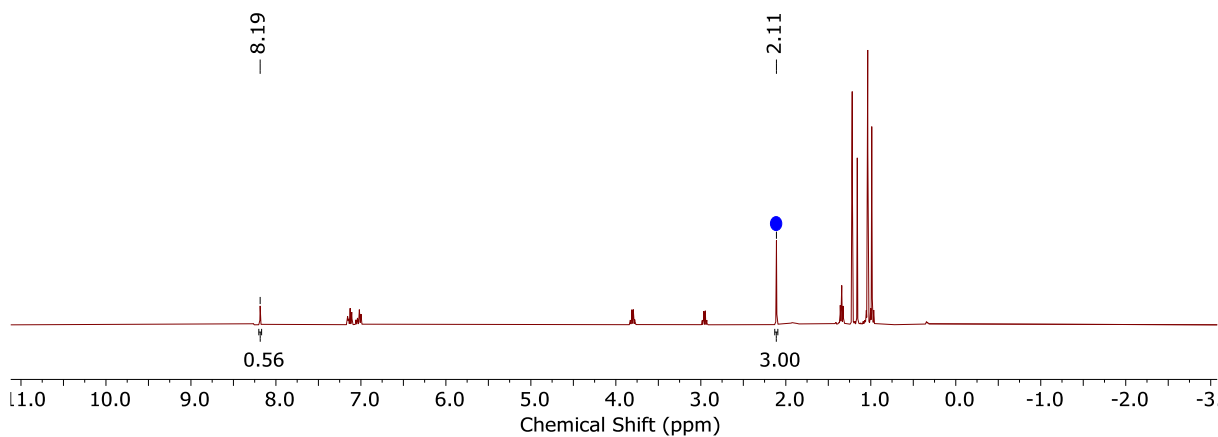

**Figure S47.**  $^1\text{H}$  NMR spectrum ( $\text{C}_6\text{D}_6$ ) of crude **12b**. ● = toluene internal standard resonance.

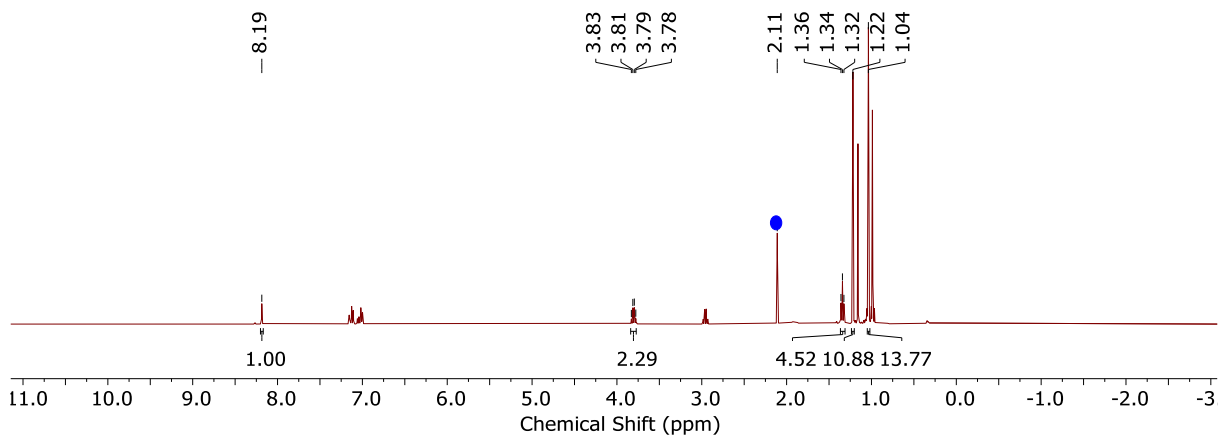

**Figure S48.**  $^1\text{H}$  NMR spectrum ( $\text{C}_6\text{D}_6$ ) of crude **12b**. ● = toluene internal standard resonance.

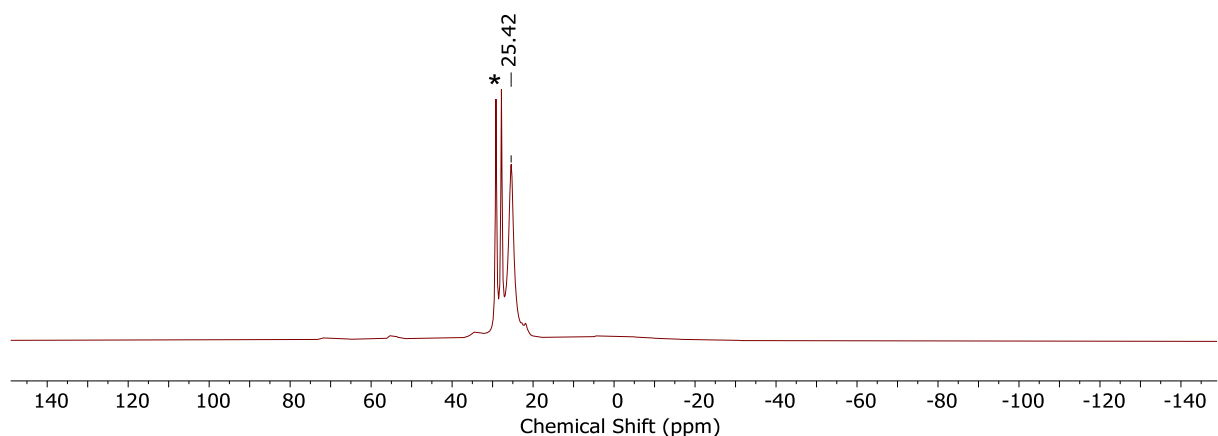

**Figure S49.**  $^{11}\text{B}$  NMR spectrum ( $\text{C}_6\text{D}_6$ ) of crude **12b**. \* = HB(pin).

6.1.5. **13b** – N-(4,4,5,5-tetramethyl-1,3,2-dioxaborolan-2-yl)-N,N'-bis(trimethylsilyl)formimidamide

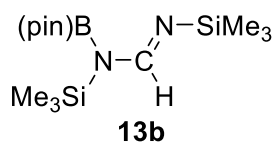

$^1\text{H}$  NMR (400 MHz, 298 K,  $\text{C}_6\text{D}_6$ ):  $\delta = 8.71$  (s, 1H,  $\text{HC}=\text{N}$ ), 1.00 (s, 12H,  $\text{Bpin}$ ), 0.35 (s, br, 18H,  $\text{CH}_3$ ) ppm.

$^{11}\text{B}$  NMR (128 MHz, 298 K,  $\text{C}_6\text{D}_6$ ):  $\delta = 26.3$  (s) ppm.

$^{29}\text{Si}\{^1\text{H}\}$  NMR (79 MHz, 298 K,  $\text{C}_6\text{D}_6$ ): not observed.

Mass spectrometry (APCI):  $\text{C}_{13}\text{H}_{31}\text{BN}_2\text{O}_2\text{Si}_2+\text{H}$  ( $[\text{M}+\text{H}]^+$ ); Calcd. = 315.2090, Found = 315.2107.

Conversion: 19%

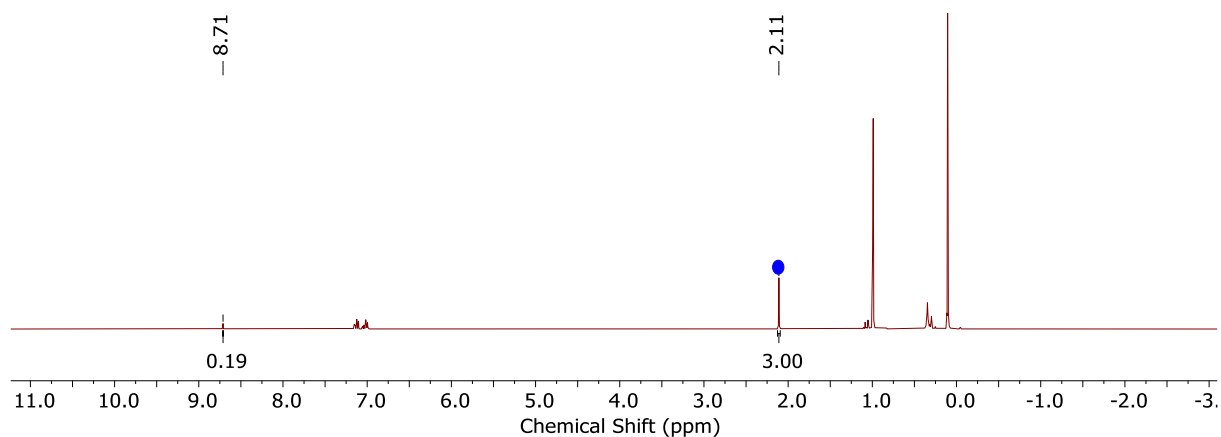

**Figure S50.**  $^1\text{H}$  NMR spectrum ( $\text{C}_6\text{D}_6$ ) of crude **13b**. ● = toluene internal standard resonance.

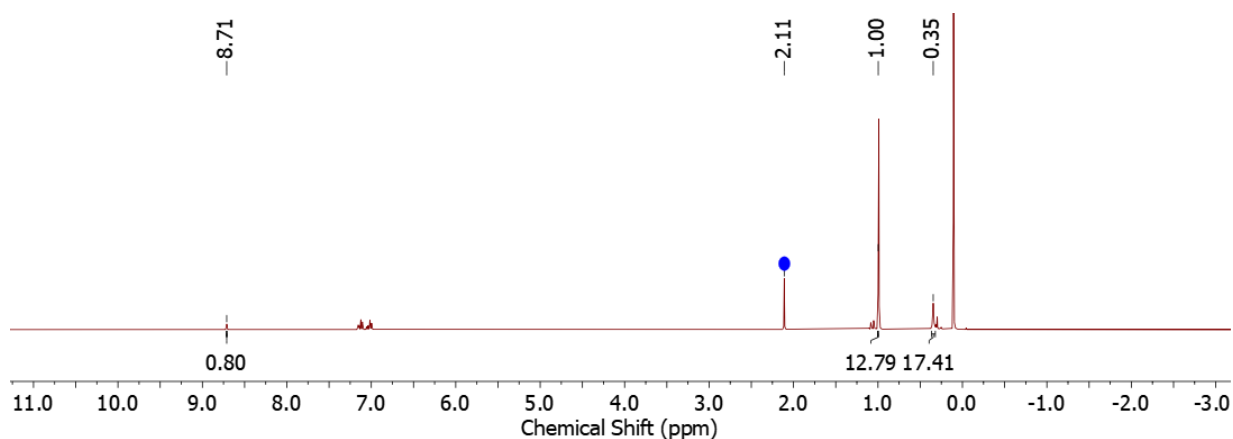

**Figure S51.**  $^1\text{H}$  NMR spectrum ( $\text{C}_6\text{D}_6$ ) of crude **13b**. • = toluene internal standard resonance.

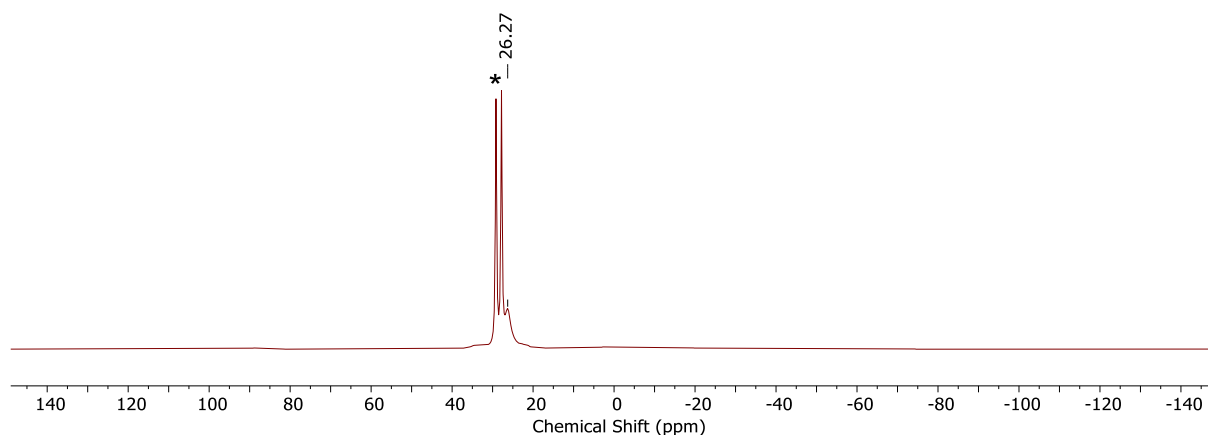

**Figure S52.**  $^{11}\text{B}$  NMR spectrum ( $\text{C}_6\text{D}_6$ ) of crude **13b**. \* = HB(pin).

6.1.6. **14b** – N,N'-bis(2,6-diisopropylphenyl)-N-(4,4,5,5-tetramethyl-1,3,2-dioxaborolan-2-yl)formimidamide

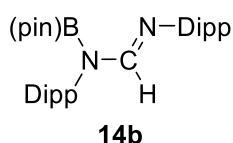

$^1\text{H}$  NMR (400 MHz, 298 K,  $\text{C}_6\text{D}_6$ ):  $\delta$  = 8.32 (s, 1H,  $\text{HC}=\text{N}$ ), 7.00 – 7.24 (m, 6H, *Ar*), 3.36 (sept,  $^3J_{\text{HH}}$  = 6.9 Hz, 2H, *CH*), 3.28 (~sept,  $^3J_{\text{HH}}$  = 6.9 Hz, 2H, *CH*), 1.38 (t,  $^3J_{\text{HH}}$  = 6.9 Hz, 12H,  $\text{CH}_3$ ), 1.20 (d,  $^3J_{\text{HH}}$  = 6.9 Hz, 12H,  $\text{CH}_3$ ), 0.96 (s, 12H, *Bpin*) ppm.

$^{11}\text{B}$  NMR (128 MHz, 298 K,  $\text{C}_6\text{D}_6$ ):  $\delta$  = 25.4 (s) ppm.

**Mass spectrometry (APCI):**  $\text{C}_{31}\text{H}_{47}\text{BN}_2\text{O}_2+\text{H}$  ( $[\text{M}+\text{H}]^+$ ); Calcd. = 491.3803, Found = 491.3803.

**Conversion:** 88%

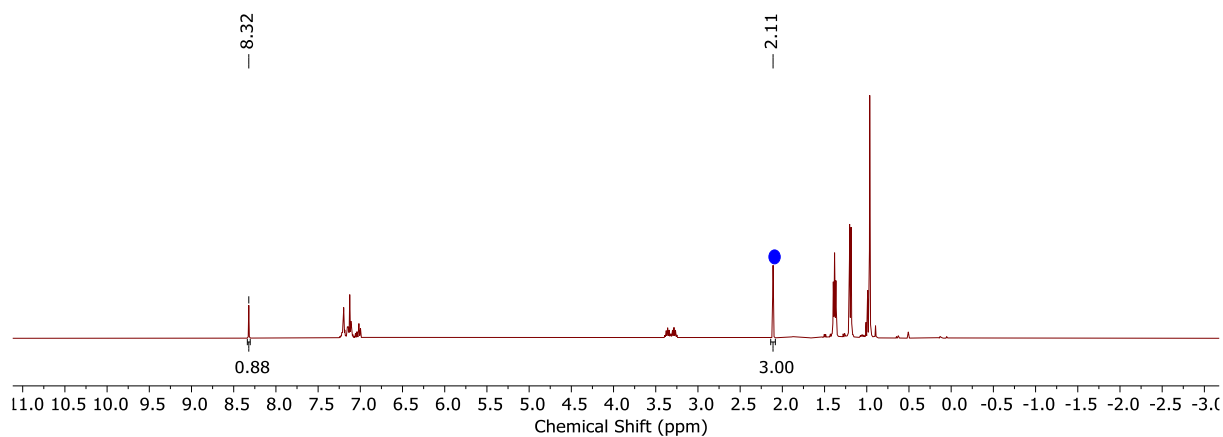

**Figure S53.**  $^1\text{H}$  NMR spectrum ( $\text{C}_6\text{D}_6$ ) of crude **14b**. ● = toluene internal standard resonance.

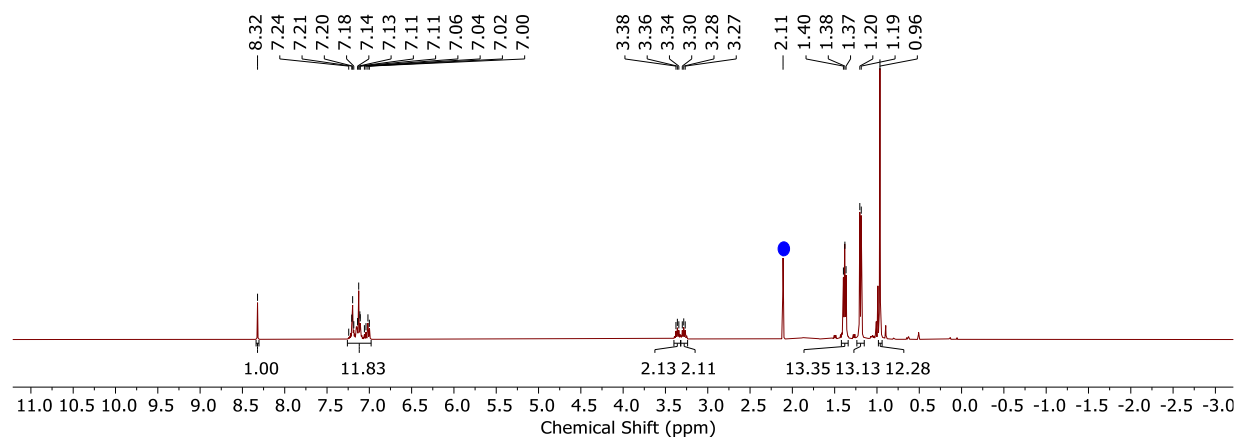

**Figure S54.**  $^1\text{H}$  NMR spectrum ( $\text{C}_6\text{D}_6$ ) of crude **14b**. ● = toluene internal standard resonance.

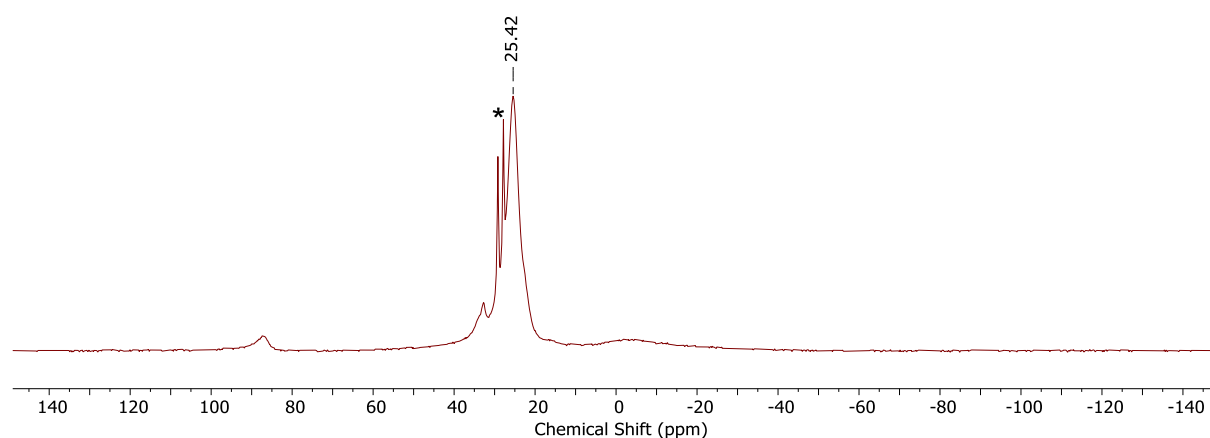

**Figure S55.**  $^{11}\text{B}$  NMR spectrum ( $\text{C}_6\text{D}_6$ ) of crude **14b**. \* = HB(pin).

## 6.2. Isocyanates

We validated our analysis of hydroborated isocyanates by comparison to various literature sources and found all data to be in agreement with those previously reported.<sup>14</sup>

### 6.2.1. **5b** - N-phenyl-N-(4,4,5,5-tetramethyl-1,3,2-dioxaborolan-2-yl)formamide

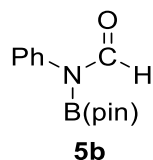

**<sup>1</sup>H NMR (400 MHz, 298 K, C<sub>6</sub>D<sub>6</sub>):**  $\delta$  = 9.16 (s, 1H, CH), 6.95 – 7.22 (m, 5H, Ar), 0.92 (s, 12H, Bpin) ppm.

**<sup>11</sup>B NMR (128 MHz, 298 K, C<sub>6</sub>D<sub>6</sub>):**  $\delta$  = 25.7 (s) ppm.

**Mass spectrometry (ESI):** C<sub>13</sub>H<sub>18</sub>BNO<sub>3</sub>+H ([M+H]<sup>+</sup>); Calcd. = 248.15, Found = 248.17.

**Conversion:** 43%

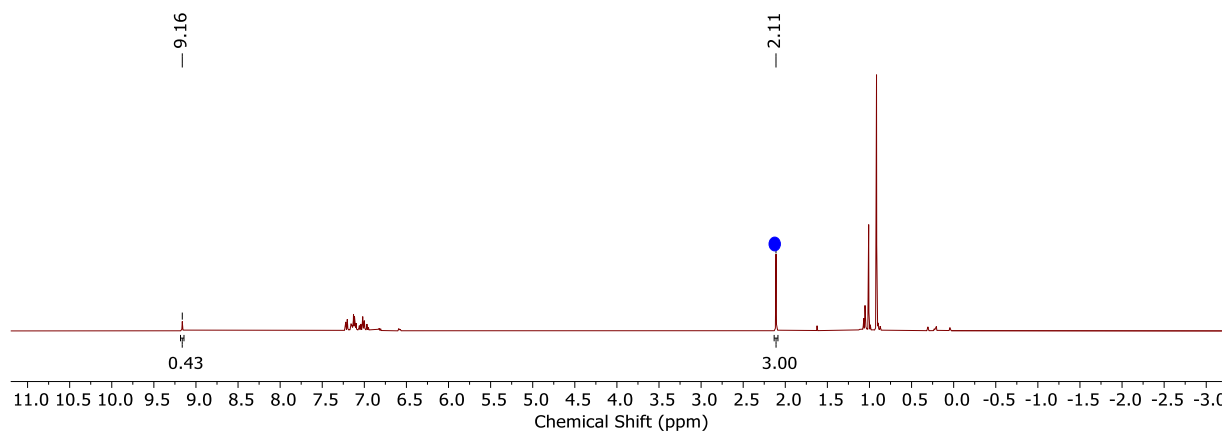

**Figure S56.** <sup>1</sup>H NMR spectrum (C<sub>6</sub>D<sub>6</sub>) of crude **5b**. ● = toluene internal standard resonance.

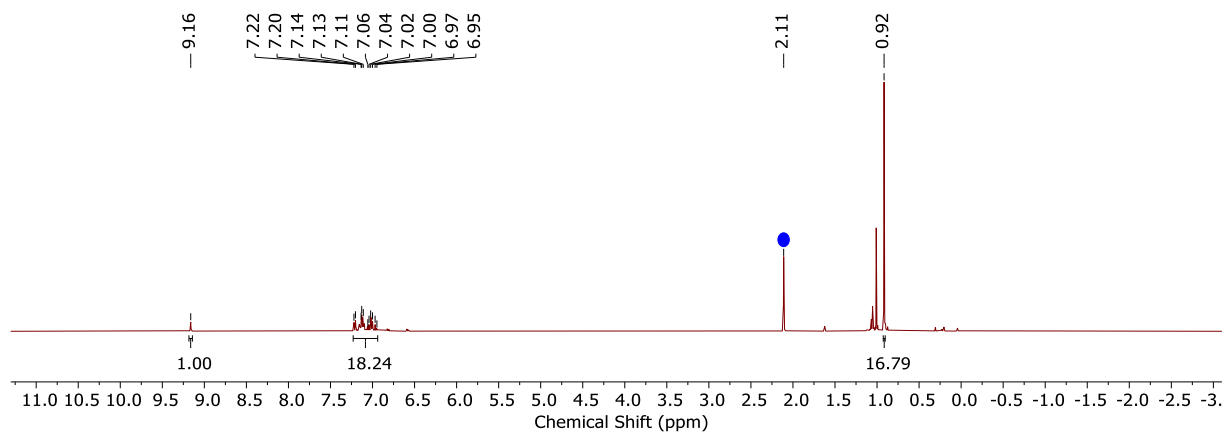

**Figure S57.**  $^1\text{H}$  NMR spectrum ( $\text{C}_6\text{D}_6$ ) of crude **5b**. • = toluene internal standard resonance.

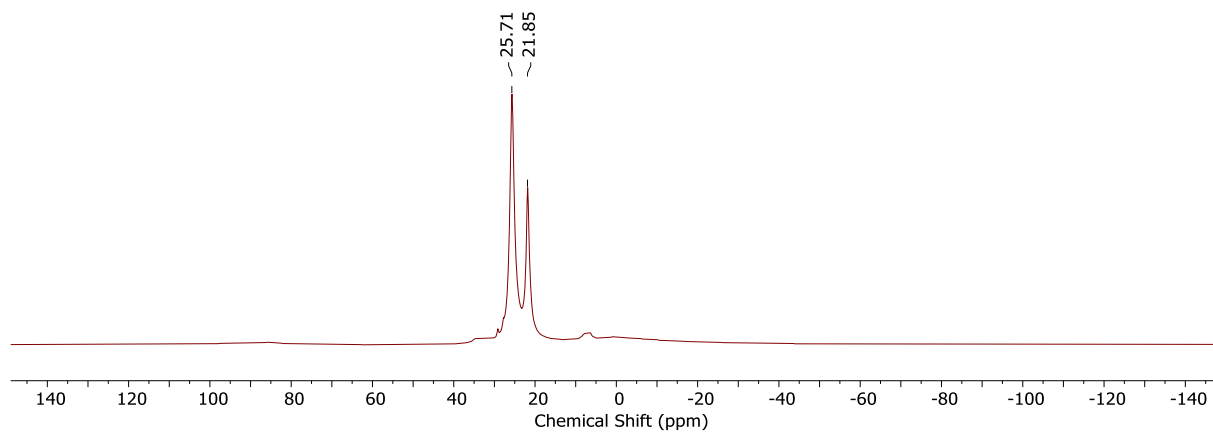

**Figure S58.**  $^{11}\text{B}$  NMR spectrum ( $\text{C}_6\text{D}_6$ ) of crude **5b**.

### 6.2.2. **15b** – N-(4,4,5,5-tetramethyl-1,3,2-dioxaborolan-2-yl)-N-(p-tolyl)formamide

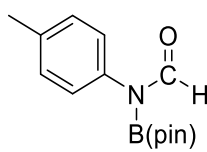

**15b**

$^1\text{H}$  NMR (400 MHz, 298 K,  $\text{C}_6\text{D}_6$ ):  $\delta = 9.18$  (s, 1H, CH), 6.92 – 7.14 (m, 4H, Ar), 2.02 (s, 3H,  $\text{CH}_3$ ), 0.93 (s, 12H, Bpin) ppm.

$^{11}\text{B}$  NMR (128 MHz, 298 K,  $\text{C}_6\text{D}_6$ ):  $\delta = 25.7$  (s) ppm.

Mass spectrometry (APCI):  $\text{C}_{14}\text{H}_{20}\text{BNO}_3 + \text{H}$  ( $[\text{M} + \text{H}]^+$ ); Calcd. = 262.1609, Found = 262.1608.

Conversion: 42%



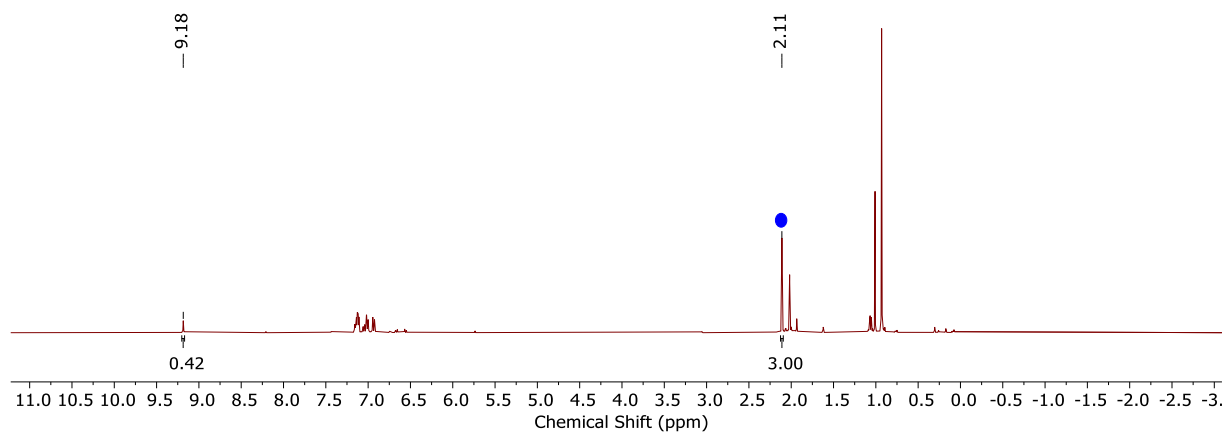

**Figure S59.**  $^1\text{H}$  NMR spectrum ( $\text{C}_6\text{D}_6$ ) of crude **15b**. ● = toluene internal standard resonance.

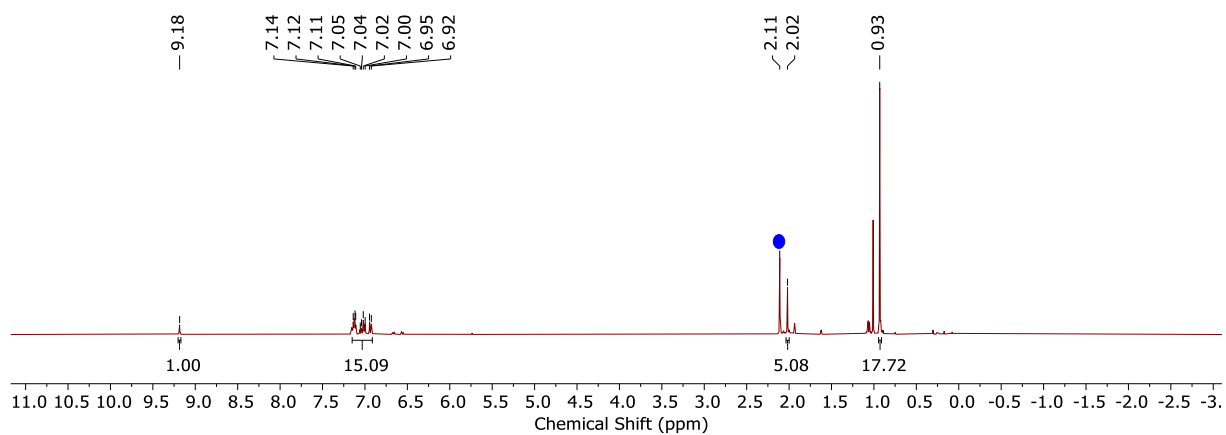

**Figure S60.**  $^1\text{H}$  NMR spectrum ( $\text{C}_6\text{D}_6$ ) of crude **15b**. ● = toluene internal standard resonance.

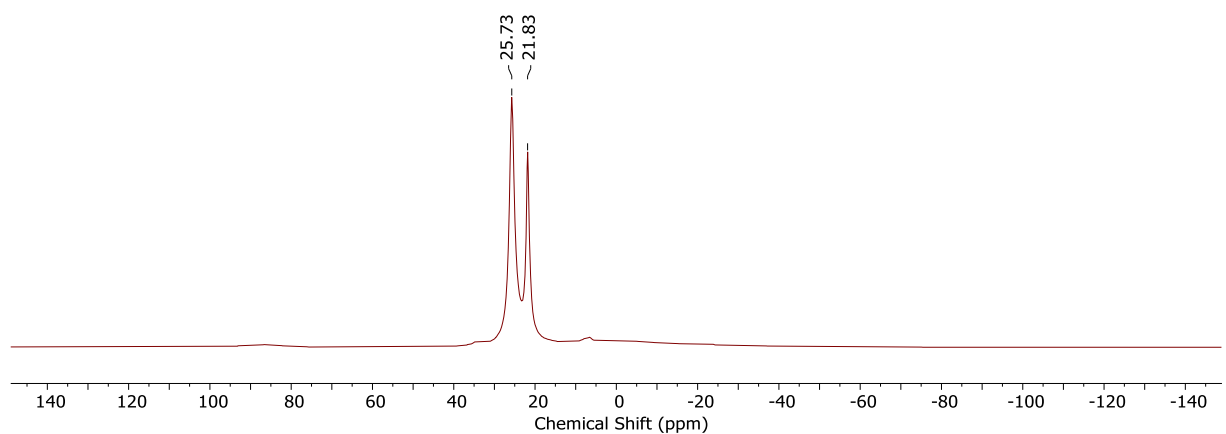

**Figure S61.**  $^{11}\text{B}$  NMR spectrum ( $\text{C}_6\text{D}_6$ ) of crude **15b**.

6.2.3. **16b** - N-(4,4,5,5-tetramethyl-1,3,2-dioxaborolan-2-yl)-N-(4-(trifluoromethyl)phenyl)formamide

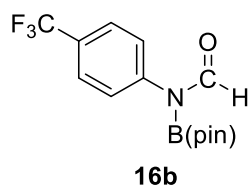

$^1\text{H}$  NMR (400 MHz, 298 K,  $\text{C}_6\text{D}_6$ ):  $\delta = 9.03$  (s, 1H, CH), 7.00 – 7.30 (m, 4H, Ar), 0.92 (s, 12H, Bpin) ppm.

$^{11}\text{B}$  NMR (128 MHz, 298 K,  $\text{C}_6\text{D}_6$ ):  $\delta = 25.5$  (s) ppm.

$^{19}\text{F}\{^1\text{H}\}$  NMR (376 MHz, 298 K,  $\text{C}_6\text{D}_6$ ):  $\delta = -69.2$  (s) ppm.

Mass spectrometry (ESI):  $\text{C}_{14}\text{H}_{17}\text{BF}_3\text{NO}_3 + \text{NH}_4$  ( $[\text{M} + \text{NH}_4]^+$ ); Calcd. = 333.16, Found = 333.08.

Conversion: 34%

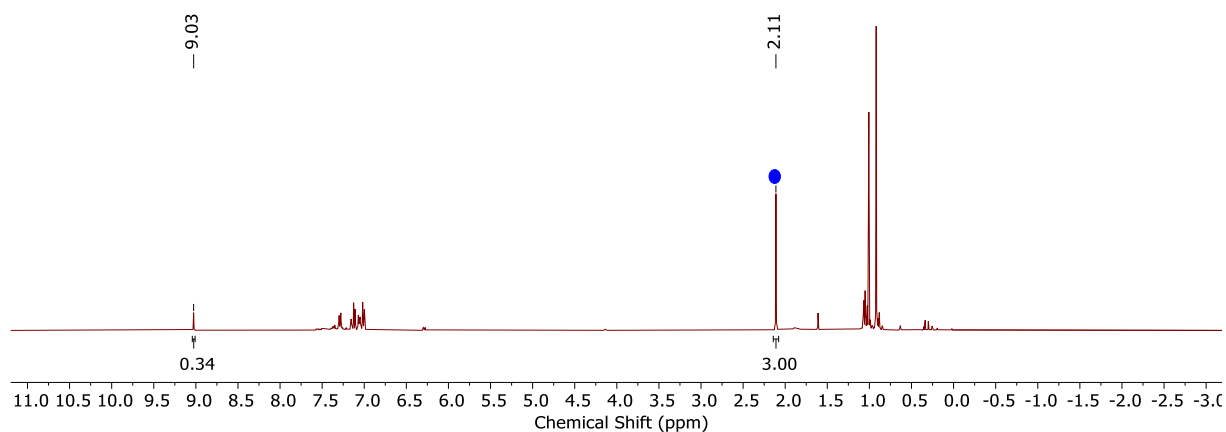

**Figure S62.**  $^1\text{H}$  NMR spectrum ( $\text{C}_6\text{D}_6$ ) of crude **16b**. ● = toluene internal standard resonance.

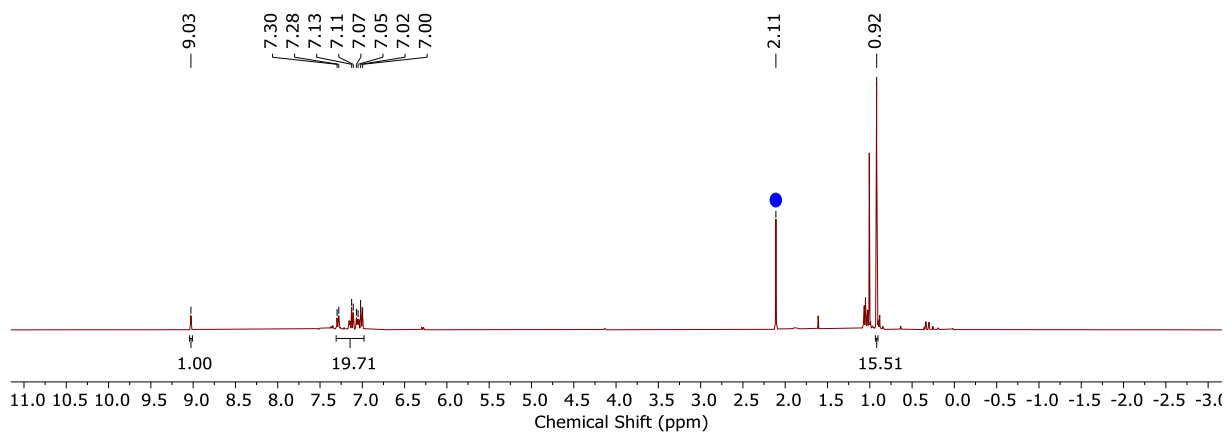

**Figure S63.**  $^1\text{H}$  NMR spectrum ( $\text{C}_6\text{D}_6$ ) of crude **16b**. ● = toluene internal standard resonance.

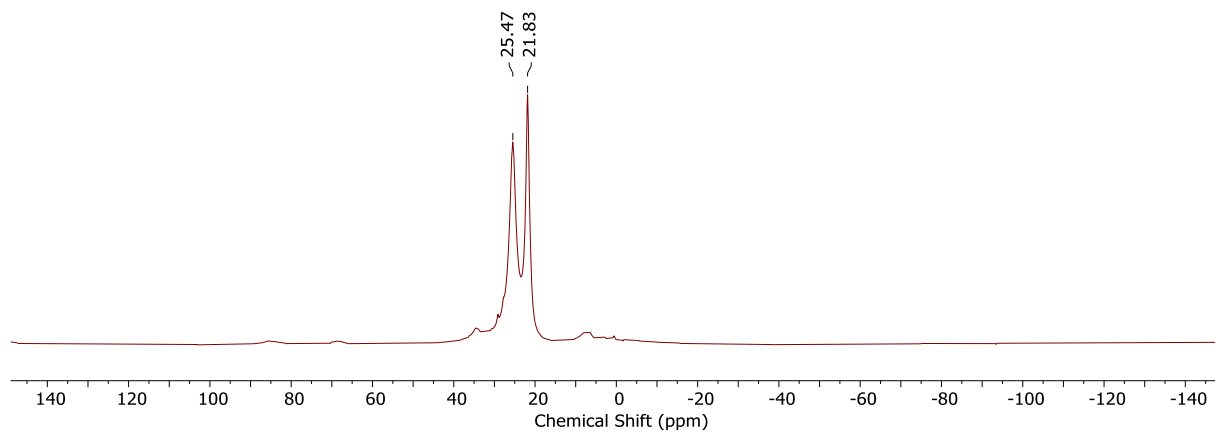

**Figure S64.**  $^{11}\text{B}$  NMR spectrum ( $\text{C}_6\text{D}_6$ ) of crude **16b**.

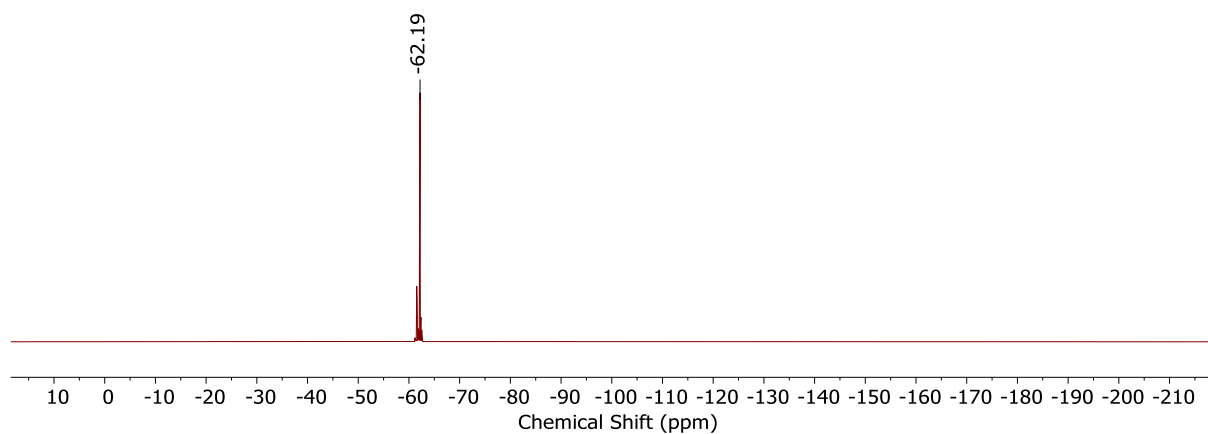

**Figure S65.**  $^{19}\text{F}\{^1\text{H}\}$  NMR spectrum ( $\text{C}_6\text{D}_6$ ) of crude **16b**.

6.2.4. **17b** – N-(4-fluorophenyl)-N-(4,4,5,5-tetramethyl-1,3,2-dioxaborolan-2-yl)formamide

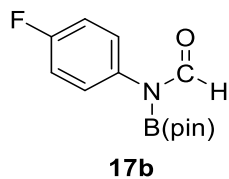

$^1\text{H}$  NMR (400 MHz, 298 K,  $\text{C}_6\text{D}_6$ ):  $\delta = 9.08$  (s, 1H, CH), 6.72 – 7.16 (m, 4H, Ar), 0.92 (s, 12H, Bpin) ppm.

$^{11}\text{B}$  NMR (128 MHz, 298 K,  $\text{C}_6\text{D}_6$ ):  $\delta = 25.6$  (s) ppm.

$^{19}\text{F}\{^1\text{H}\}$  NMR (376 MHz, 298 K,  $\text{C}_6\text{D}_6$ ):  $\delta = -118.2$  (s) ppm.

Mass spectrometry (APCI):  $\text{C}_{13}\text{H}_{17}\text{BFNO}_3 + \text{H}$  ( $[\text{M} + \text{H}]^+$ ); Calcd. = 266.1358, Found = 266.1356.

Conversion: 32%

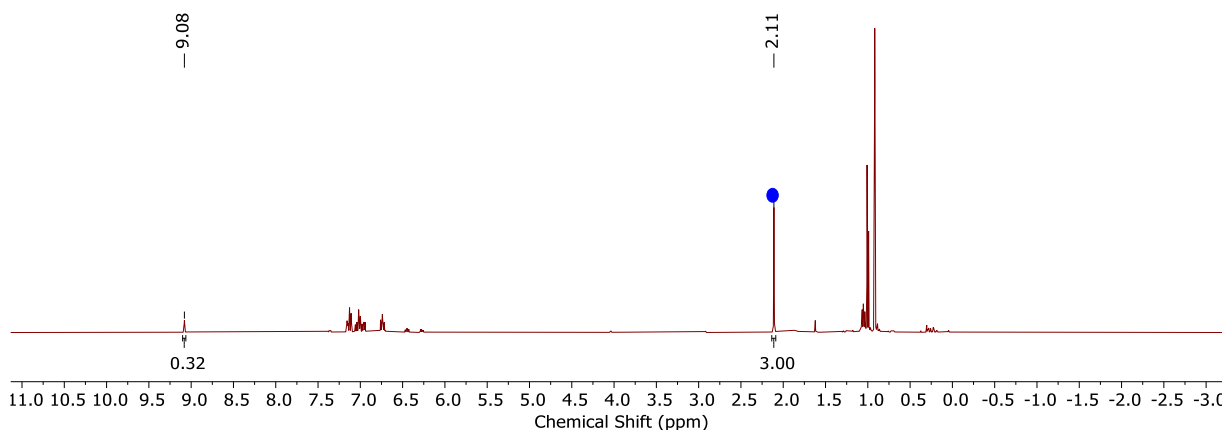

**Figure S66.**  $^1\text{H}$  NMR spectrum ( $\text{C}_6\text{D}_6$ ) of crude **17b**. ● = toluene internal standard resonance.

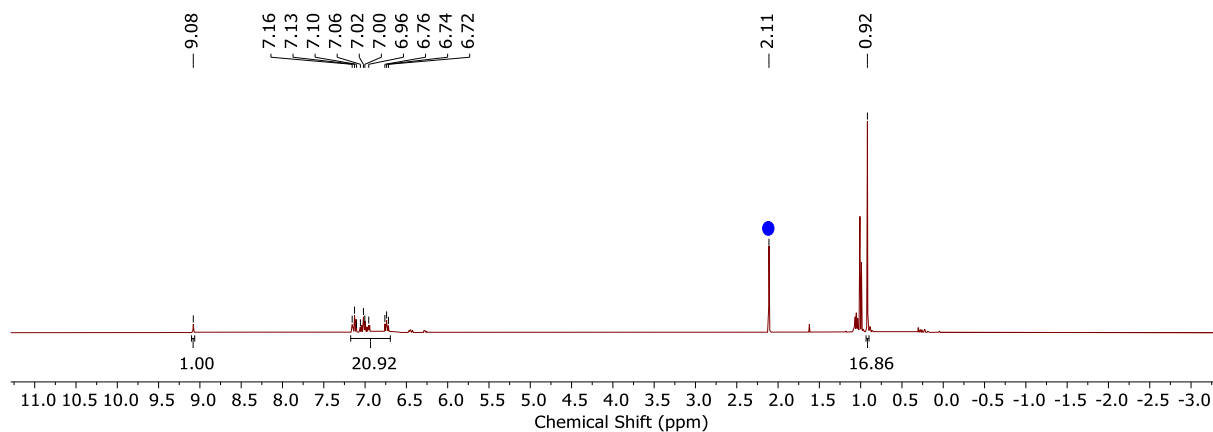

**Figure S67.**  $^1\text{H}$  NMR spectrum ( $\text{C}_6\text{D}_6$ ) of crude **17b**. ● = toluene internal standard resonance.

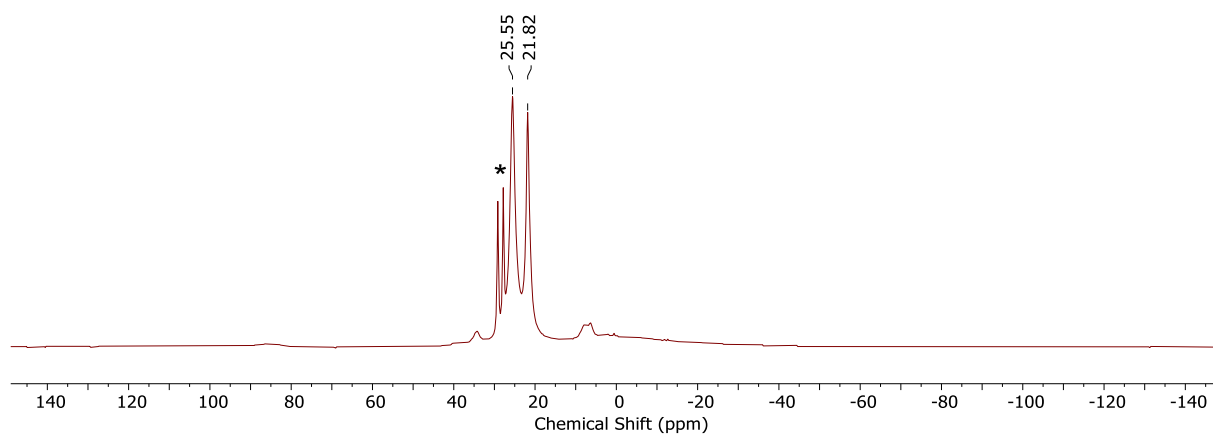

**Figure S68.**  $^{11}\text{B}$  NMR spectrum ( $\text{C}_6\text{D}_6$ ) of crude **17b**. \* = HB(pin).

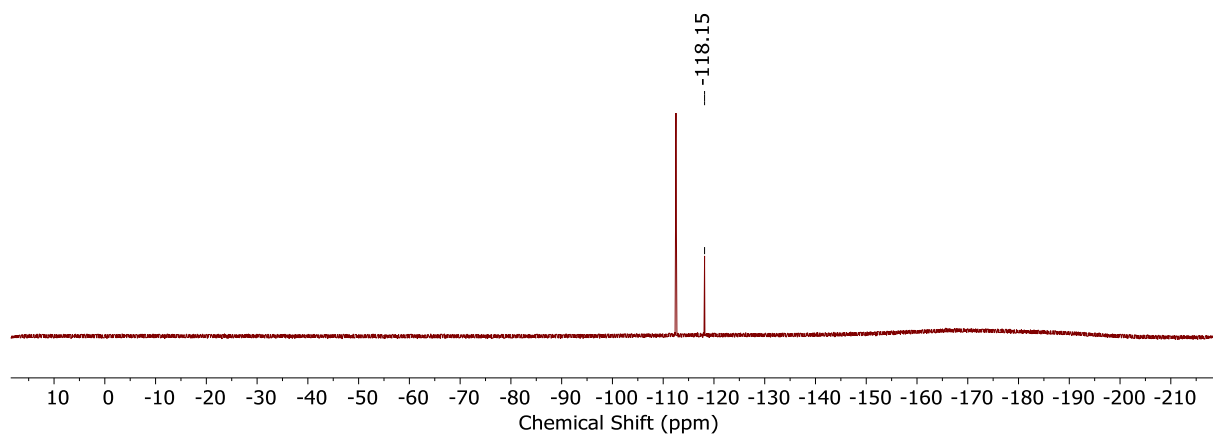

**Figure S69.**  $^{19}\text{F}\{^1\text{H}\}$  NMR spectrum ( $\text{C}_6\text{D}_6$ ) of crude **17b**.

6.2.5. **18b** – N-(4-bromophenyl)-N-(4,4,5,5-tetramethyl-1,3,2-dioxaborolan-2-yl)formamide

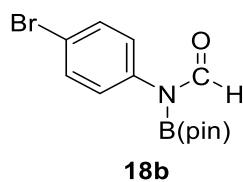

$^1\text{H}$  NMR (400 MHz, 298 K,  $\text{C}_6\text{D}_6$ ):  $\delta = 9.04$  (s, 1H, CH), 6.84 – 7.25 (m, 4H, Ar), 0.91 (s, 12H, Bpin) ppm.

$^{11}\text{B}$  NMR (128 MHz, 298 K,  $\text{C}_6\text{D}_6$ ):  $\delta = 25.4$  (s) ppm.

Mass spectrometry (ESI):  $\text{C}_{13}\text{H}_{17}\text{BBrNO}_3 + \text{H}$  ( $[\text{M} + \text{H}]^+$ ); Calcd. = 327.06, Found = 327.08.

Conversion: 36%

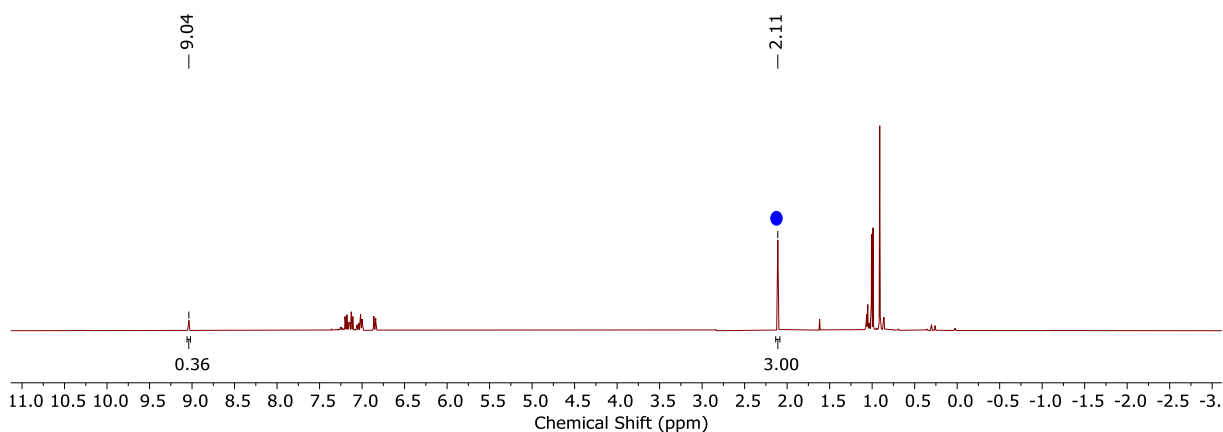

**Figure S70.**  $^1\text{H}$  NMR spectrum ( $\text{C}_6\text{D}_6$ ) of crude **18b**. ● = toluene internal standard resonance.

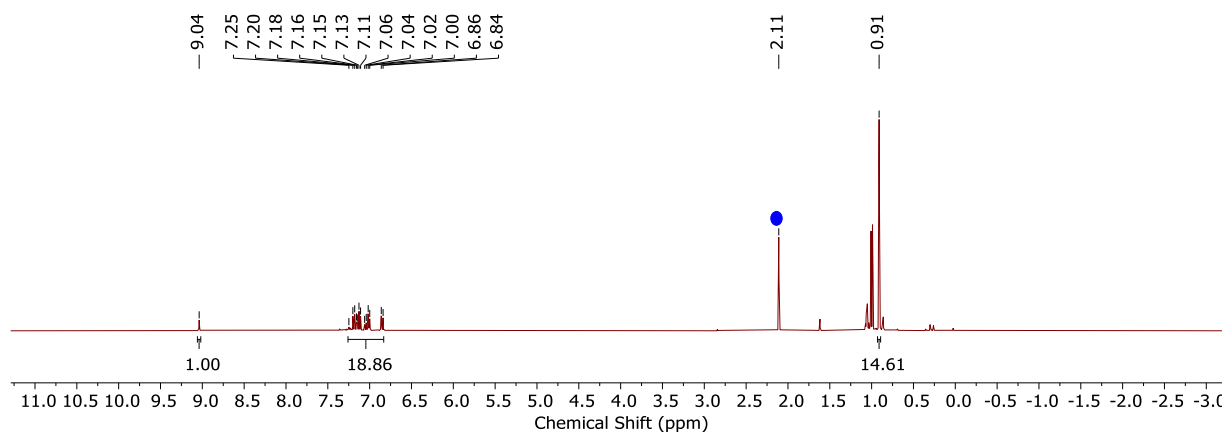

**Figure S71.**  $^1\text{H}$  NMR spectrum ( $\text{C}_6\text{D}_6$ ) of crude **18b**. • = toluene internal standard resonance.

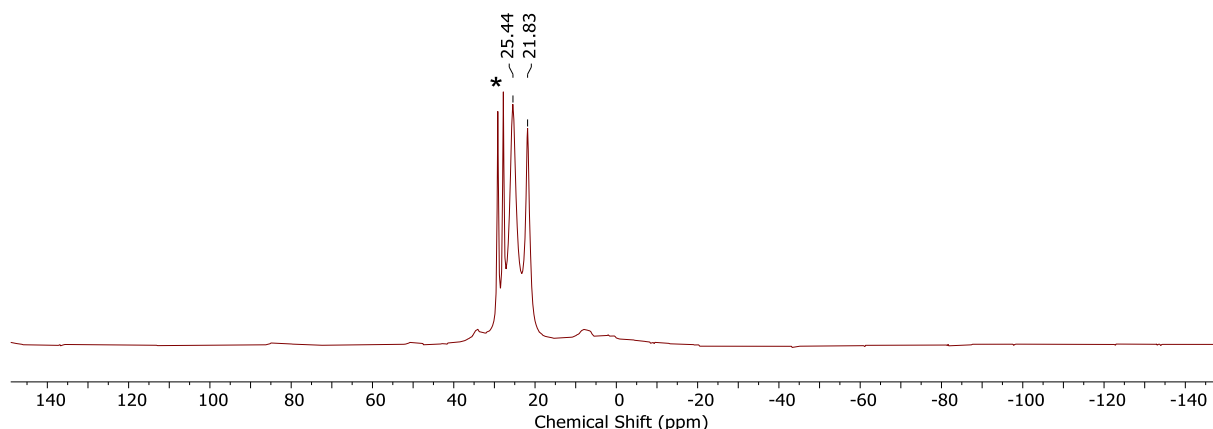

**Figure S72.**  $^{11}\text{B}$  NMR spectrum ( $\text{C}_6\text{D}_6$ ) of crude **18b**. \* = HB(pin).

#### 6.2.6. **19b** – N-cyclohexyl-N-(4,4,5,5-tetramethyl-1,3,2-dioxaborolan-2-yl)formamide

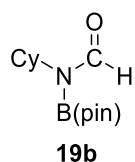

$^1\text{H}$  NMR (400 MHz, 298 K,  $\text{C}_6\text{D}_6$ ):  $\delta = 9.10$  (s, 1H, CH), 4.34 (m, 1H, Cy), 1.62 – 2.01 (m, 10H, Cy), 0.95 (s, 12H, Bpin) ppm.

$^{11}\text{B}$  NMR (128 MHz, 298 K,  $\text{C}_6\text{D}_6$ ):  $\delta = 25.9$  (s) ppm.

**Mass spectrometry (ESI):**  $\text{C}_{13}\text{H}_{24}\text{BNO}_3 + \text{H}$  ( $[\text{M} + \text{H}]^+$ ); Calcd. = 254.19, Found = 254.17.

**Conversion:** 60%

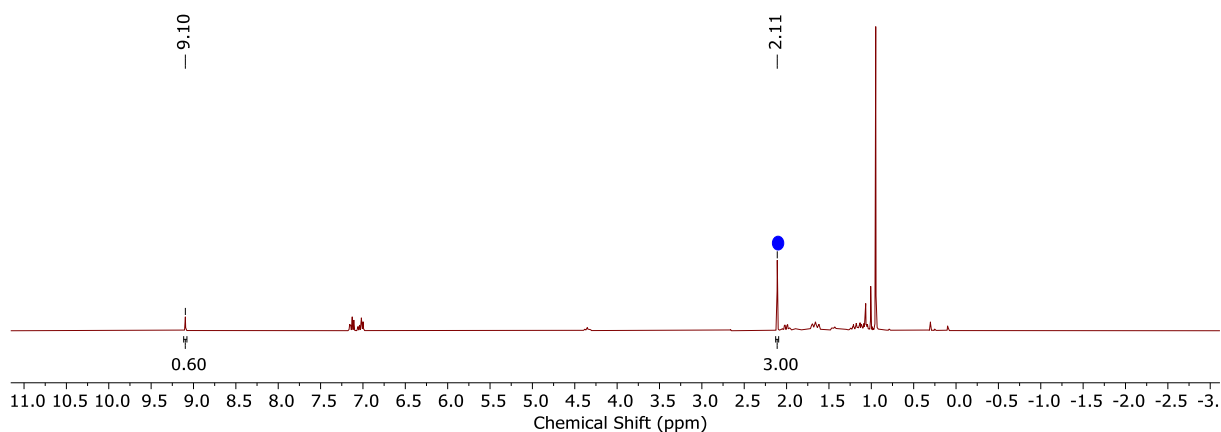

**Figure S73.**  $^1\text{H}$  NMR spectrum ( $\text{C}_6\text{D}_6$ ) of crude **19b**. ● = toluene internal standard resonance.

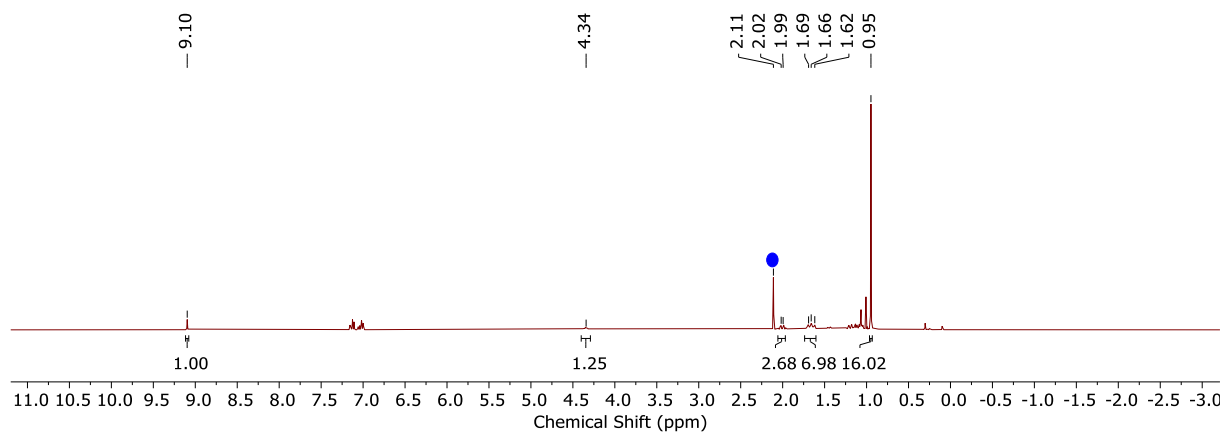

**Figure S74.**  $^1\text{H}$  NMR spectrum ( $\text{C}_6\text{D}_6$ ) of crude **19b**. ● = toluene internal standard resonance.

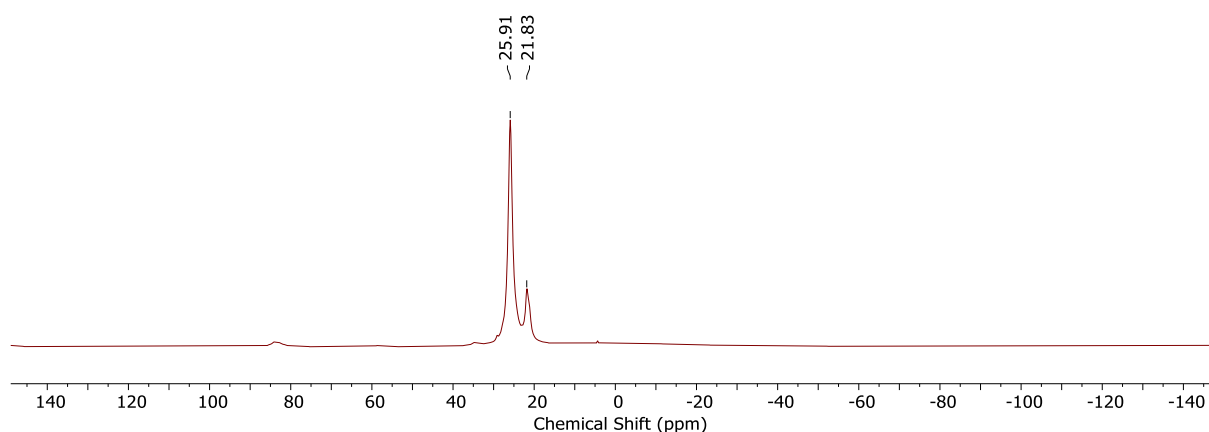

**Figure S75.**  $^{11}\text{B}$  NMR spectrum ( $\text{C}_6\text{D}_6$ ) of crude **19b**.

6.2.7. **20b** – N-tert-butyl-N-(4,4,5,5-tetramethyl-1,3,2-dioxaborolan-2-yl)formamide

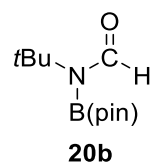

$^1\text{H}$  NMR (400 MHz, 298 K,  $\text{C}_6\text{D}_6$ ):  $\delta$  = 9.14 (s, 1H, CH), 1.55 (s, 9H,  $\text{CH}_3$ ), 0.91 (s, 12H, Bpin) ppm.

$^{11}\text{B}$  NMR (128 MHz, 298 K,  $\text{C}_6\text{D}_6$ ):  $\delta$  = 26.1 (s) ppm.



**Mass spectrometry (ESI):**  $C_{11}H_{22}BNO_3+Na$  ( $[M+Na]^+$ ); Calcd. = 250.16, Found = 249.92.

**Conversion:** 49%

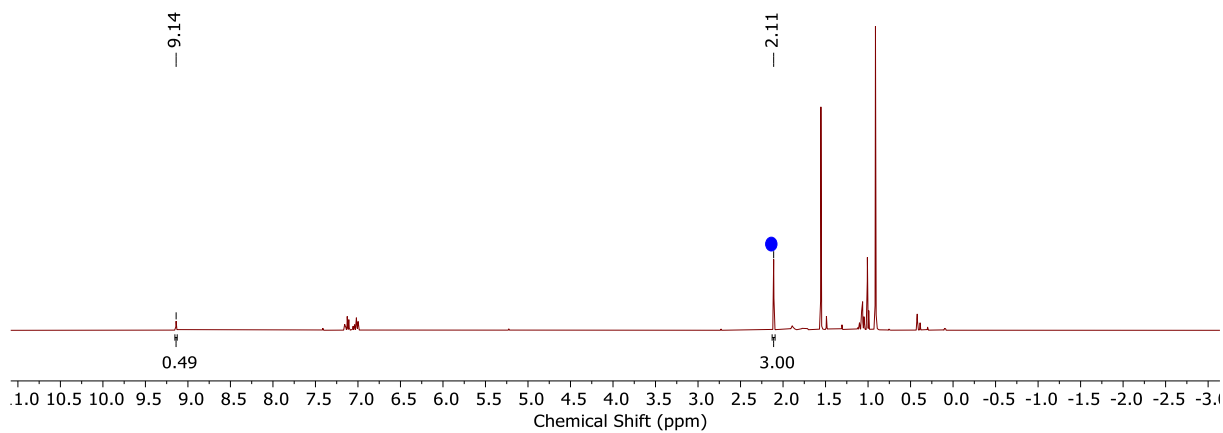

**Figure S76.**  $^1H$  NMR spectrum ( $C_6D_6$ ) of crude **20b**. ● = toluene internal standard resonance.

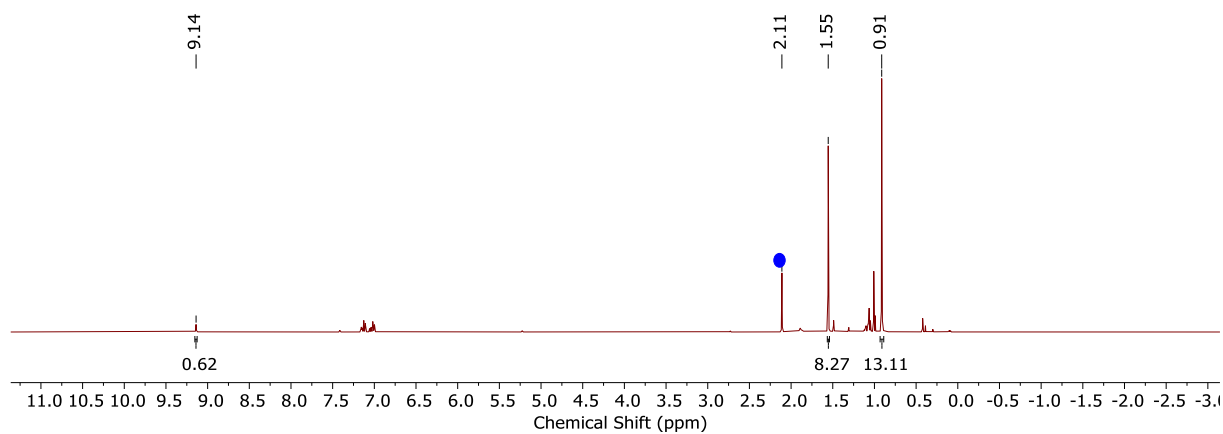

**Figure S77.**  $^1H$  NMR spectrum ( $C_6D_6$ ) of crude **20b**. ● = toluene internal standard resonance.

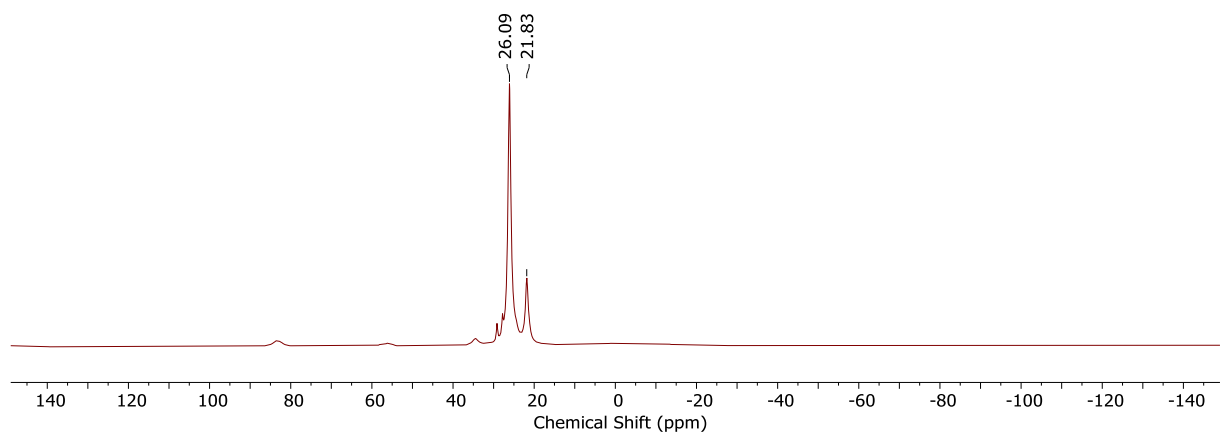

**Figure S78.**  $^{11}\text{B}$  NMR spectrum ( $\text{C}_6\text{D}_6$ ) of crude **20b**.

6.2.8. **21b** – N-benzyl-N-(4,4,5,5-tetramethyl-1,3,2-dioxaborolan-2-yl)formamide

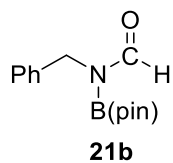

$^1\text{H}$  NMR (400 MHz, 298 K,  $\text{C}_6\text{D}_6$ ):  $\delta = 8.98$  (s, 1H, CH), 7.00 – 7.47 (m, 5H, Ar), 4.57 (s, 2H,  $\text{CH}_2$ ), 0.90 (s, 12H, Bpin) ppm.

$^{11}\text{B}$  NMR (128 MHz, 298 K,  $\text{C}_6\text{D}_6$ ):  $\delta = 25.8$  (s) ppm.

Mass spectrometry (ESI):  $\text{C}_{14}\text{H}_{20}\text{BNO}_3 + \text{H}$  ( $[\text{M} + \text{H}]^+$ ); Calcd. = 262.16, Found = 262.00.

Conversion: 41%

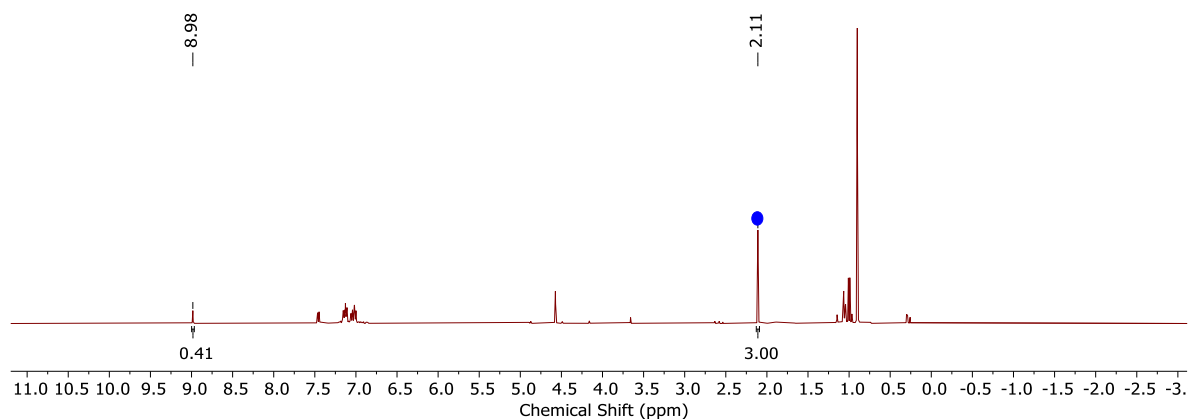

**Figure S79.**  $^1\text{H}$  NMR spectrum ( $\text{C}_6\text{D}_6$ ) of crude **21b**. ● = toluene internal standard resonance.

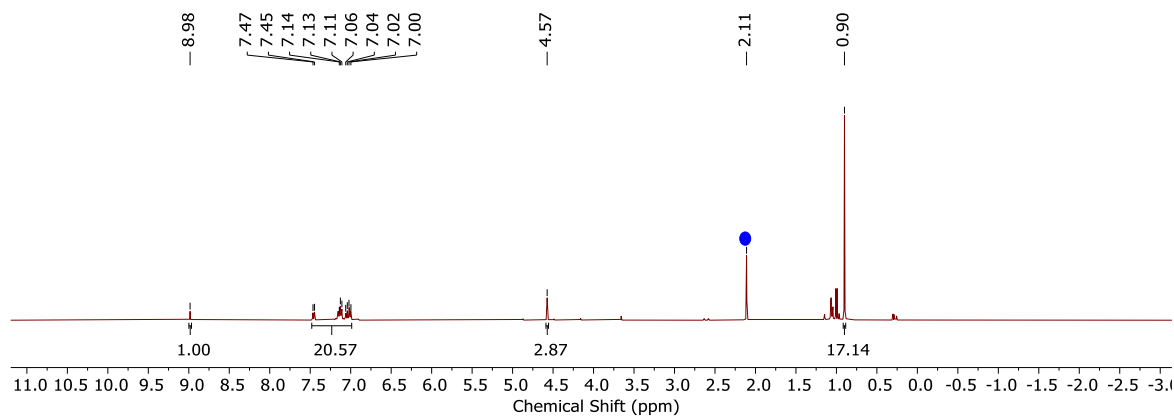

**Figure S80.**  $^1\text{H}$  NMR spectrum ( $\text{C}_6\text{D}_6$ ) of crude **21b**. • = toluene internal standard resonance.

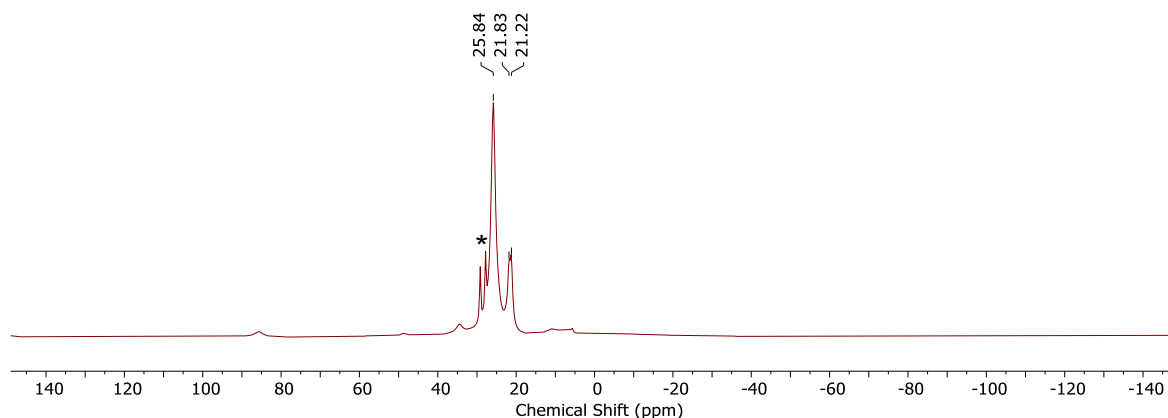

**Figure S81.**  $^{11}\text{B}$  NMR spectrum ( $\text{C}_6\text{D}_6$ ) of crude **21b**. \* = HB(pin).

### 6.3. Ketones

We validated our analysis of hydroborated ketones by comparison to various literature sources and found all data to be in agreement with those previously reported.<sup>13, 15</sup>

#### 6.3.1. **6b** – 4,4,5,5-tetramethyl-2-(1-phenylethoxy)-1,3,2-dioxaborolane

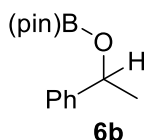

$^1\text{H}$  NMR (400 MHz, 298 K,  $\text{C}_6\text{D}_6$ ):  $\delta$  = 7.38 (d,  $^3J_{\text{HH}}$  = 7.7 Hz, 2H, Ar), 7.14 (t,  $^3J_{\text{HH}}$  = 7.7 Hz, 2H, Ar), 7.05 (t,  $^3J_{\text{HH}}$  = 7.7 Hz, 1H, Ar), 5.42 (q,  $^3J_{\text{HH}}$  = 6.5 Hz, 1H, CH), 1.47 (d,  $^3J_{\text{HH}}$  = 6.5 Hz, 3H,  $\text{CH}_3$ ), 1.03 (s, 6H, Bpin), 1.00 (s, 6H, Bpin) ppm.

$^{11}\text{B}$  NMR (128 MHz, 298 K,  $\text{C}_6\text{D}_6$ ):  $\delta$  = 22.6 (s) ppm.

Mass spectrometry (ESI):  $\text{C}_{14}\text{H}_{21}\text{BO}_3 + \text{H}$  ( $[\text{M} + \text{H}]^+$ ); Calcd. = 249.17, Found = 249.67.

Conversion: 90%

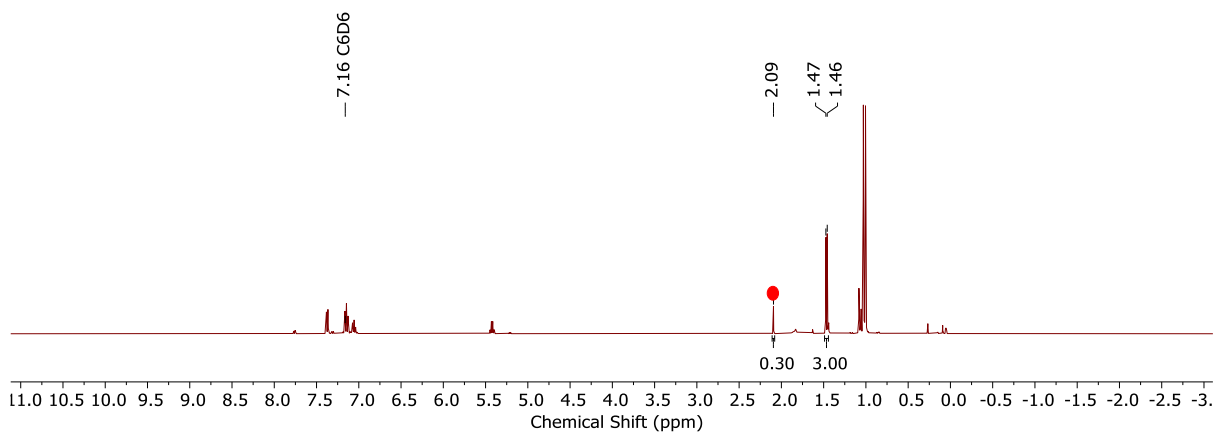

**Figure S82.**  $^1\text{H}$  NMR spectrum ( $\text{C}_6\text{D}_6$ ) of crude **6b**. ● = unreacted start material used to determine conversion.

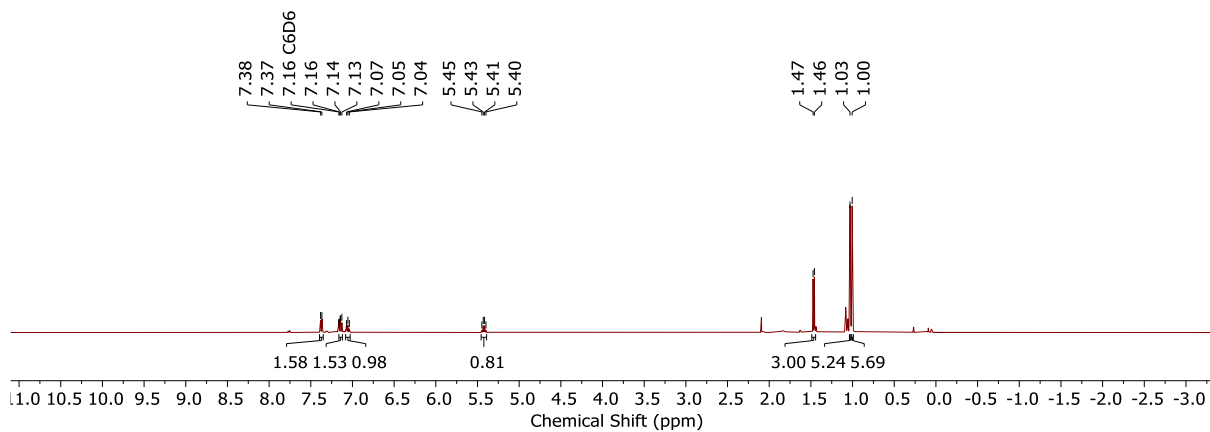

**Figure S83.**  $^1\text{H}$  NMR spectrum ( $\text{C}_6\text{D}_6$ ) of crude **6b**.

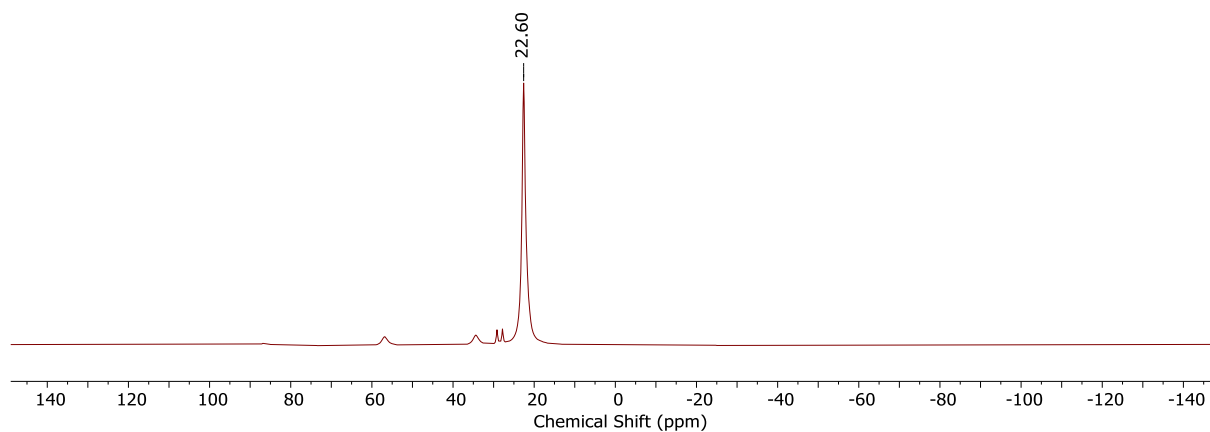

**Figure S84.**  $^{11}\text{B}$  NMR spectrum ( $\text{C}_6\text{D}_6$ ) of crude **6b**.

6.3.2. **22b** – 2-(benzhydryloxy)-4,4,5,5-tetramethyl-1,3,2-dioxaborolane

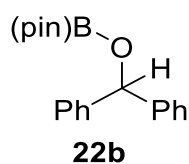

$^1\text{H}$  NMR (400 MHz, 298 K,  $\text{C}_6\text{D}_6$ ):  $\delta = 7.00 - 7.71$  (m, 10H, Ar), 6.44 (s, 1H, CH), 0.99 (s, 12H, Bpin) ppm.

$^{11}\text{B}$  NMR (128 MHz, 298 K,  $\text{C}_6\text{D}_6$ ):  $\delta = 22.9$  (s) ppm.

Mass spectrometry (APCI):  $\text{C}_{19}\text{H}_{23}\text{O}_3\text{B}+\text{Na}$  ( $[\text{M}+\text{Na}]^+$ ); Calcd = 333.1632, Found = 333.1640.

Conversion: 42%

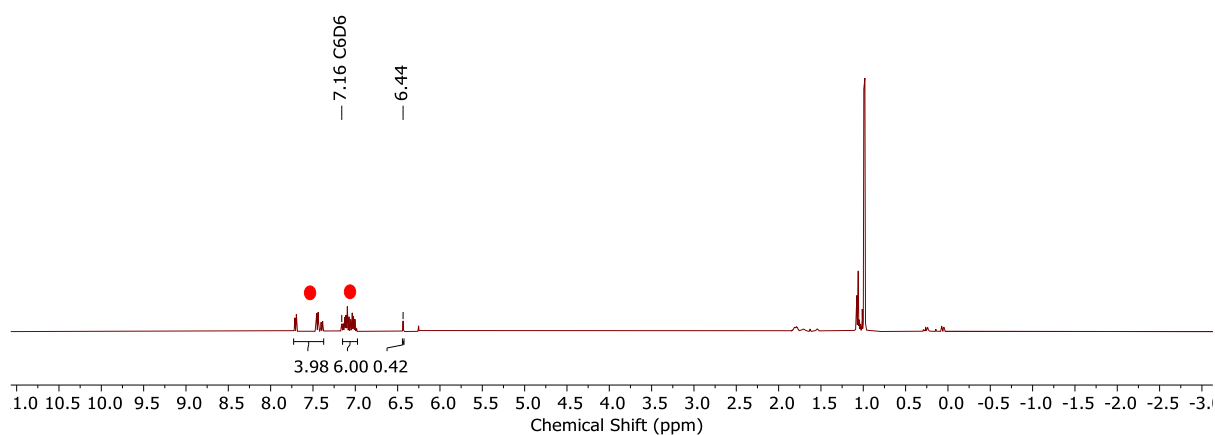

Figure S85.  $^1\text{H}$  NMR spectrum ( $\text{C}_6\text{D}_6$ ) of crude **22b**. ● = unreacted start material used to determine conversion.

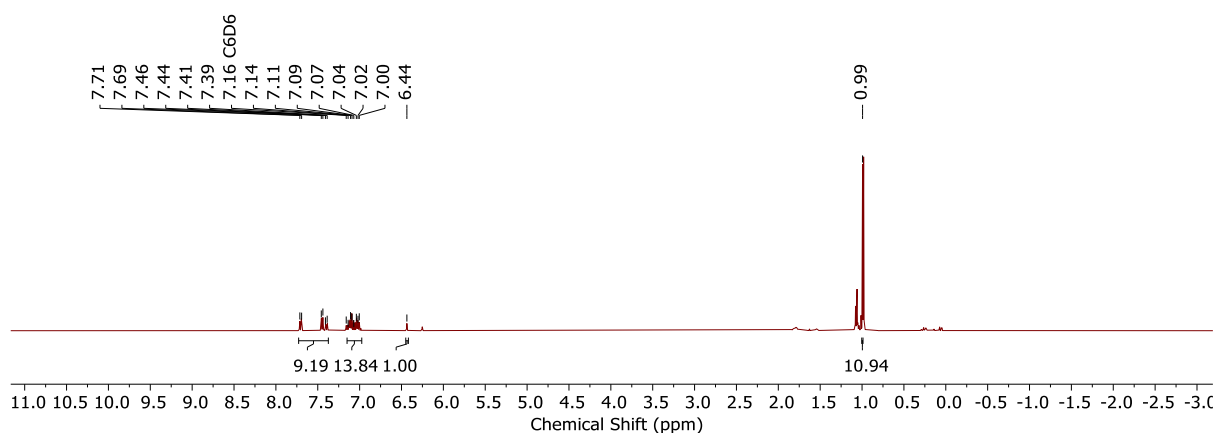

Figure S86.  $^1\text{H}$  NMR spectrum ( $\text{C}_6\text{D}_6$ ) of crude **22b**.

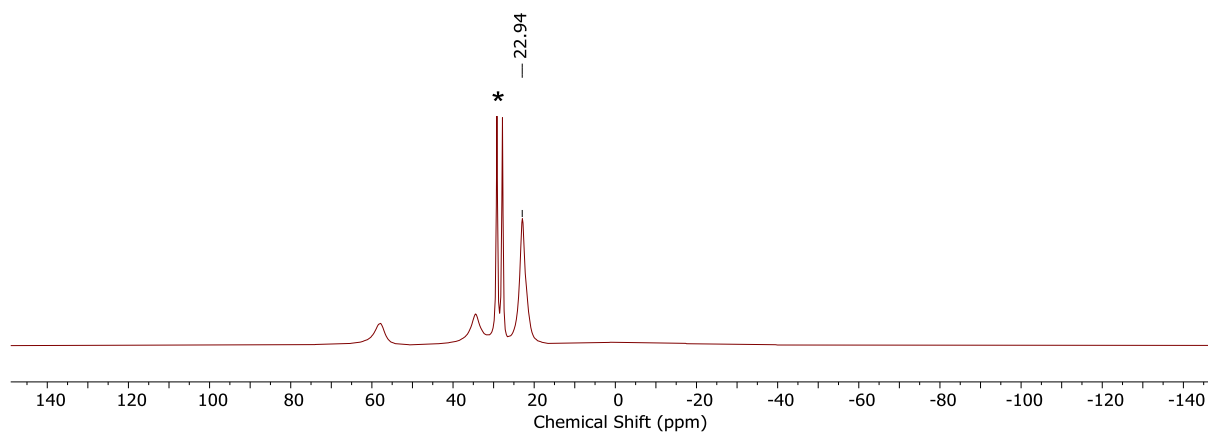

**Figure S87.**  $^{11}\text{B}$  NMR spectrum ( $\text{C}_6\text{D}_6$ ) of crude **22b**. \* = HB(pin).

6.3.3. **23b** – 2-(phenyl((4,4,5,5-tetramethyl-1,3,2-dioxaborolan-2-yl)oxy)methyl)pyridine

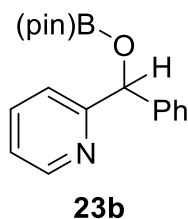

$^1\text{H}$  NMR (400 MHz, 298 K,  $\text{C}_6\text{D}_6$ ):  $\delta$  = 6.39 – 8.31 (m, 9H, Ar), 6.32 (s, 1H, CH), 1.27 (s, 12H, Bpin) ppm.

$^{11}\text{B}$  NMR (128 MHz, 298 K,  $\text{C}_6\text{D}_6$ ):  $\delta$  = 17.7 (s) ppm.

**Mass spectrometry (ESI):**  $\text{C}_{18}\text{H}_{22}\text{BNO}_3 + \text{H}$  ( $[\text{M} + \text{H}]^+$ ); Calcd. = 312.18, Found = 312.08.

**Conversion:** 86%

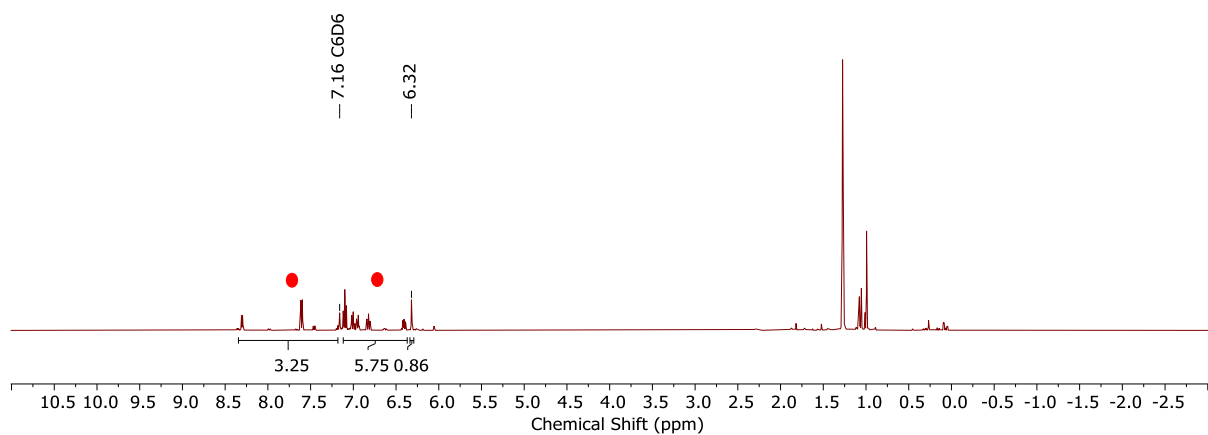

**Figure S88.**  $^1\text{H}$  NMR spectrum ( $\text{C}_6\text{D}_6$ ) of crude **23b**. ● = unreacted start material used to determine conversion.

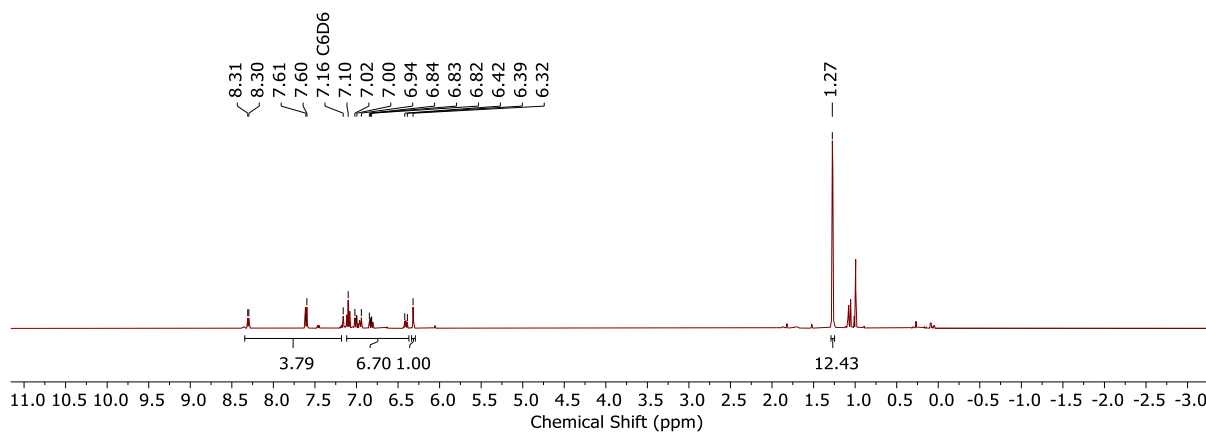

**Figure S89.**  $^1\text{H}$  NMR spectrum ( $\text{C}_6\text{D}_6$ ) of crude **23b**.

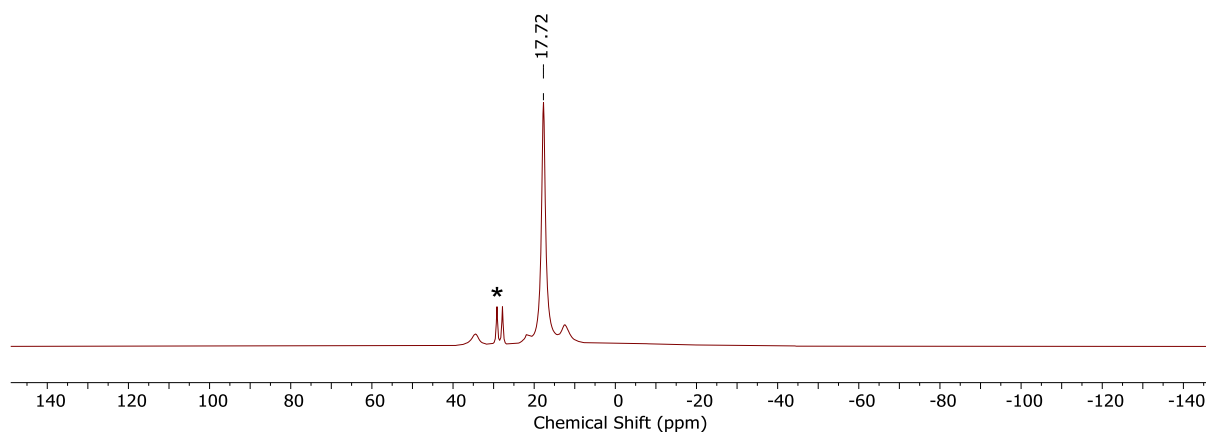

**Figure S90.**  $^{11}\text{B}$  NMR spectrum ( $\text{C}_6\text{D}_6$ ) of crude **23b**. \* = HB(pin).

#### 6.3.4. **24b** – 4,4,5,5-tetramethyl-2-(1-(thiophen-2-yl)ethoxy)-1,3,2-dioxaborolane

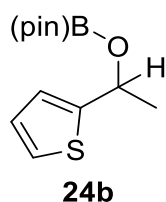

$^1\text{H}$  NMR (400 MHz, 298 K,  $\text{C}_6\text{D}_6$ ):  $\delta$  = 6.82 – 6.88 (m, 2H, Ar), 6.68 – 6.70 (m, 1H, Ar), 5.63 & 5.41 (q,  $^3J_{\text{HH}}$  = 6.4 Hz, 1H, CH), 1.52 & 1.50 (d,  $^3J_{\text{HH}}$  = 6.4 Hz, 3H,  $\text{CH}_3$ ), 1.03 & 1.01 (12H, s, Bpin) ppm.

$^{11}\text{B}$  NMR (128 MHz, 298 K,  $\text{C}_6\text{D}_6$ ):  $\delta$  = 22.6 (s) ppm.

**Mass spectrometry (ESI):**  $C_{12}H_{19}BO_3S+H$  ( $[M+H]^+$ ); Calcd. = 255.12, Found = 255.00.

**Conversion:** 82%

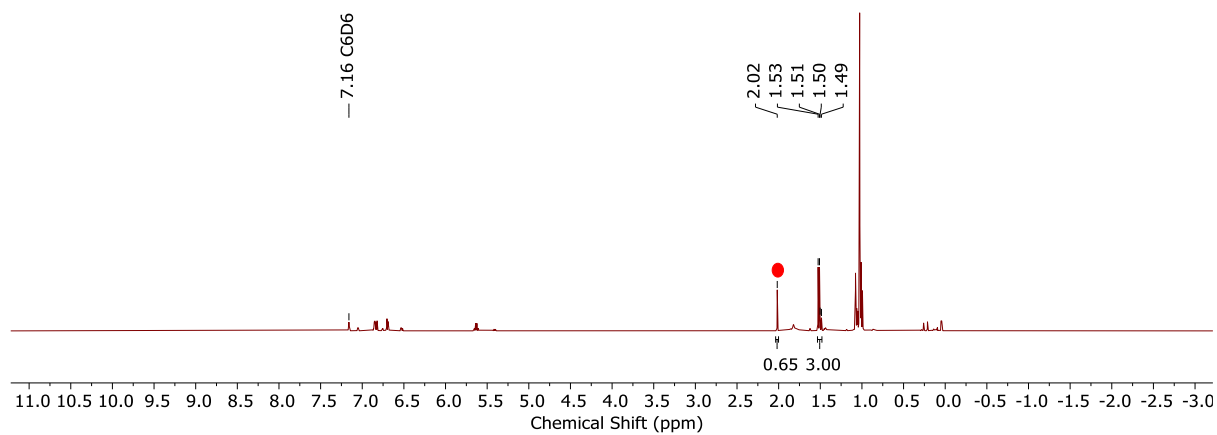

**Figure S91.**  $^1H$  NMR spectrum ( $C_6D_6$ ) of crude **24b**. ● = unreacted start material used to determine conversion.

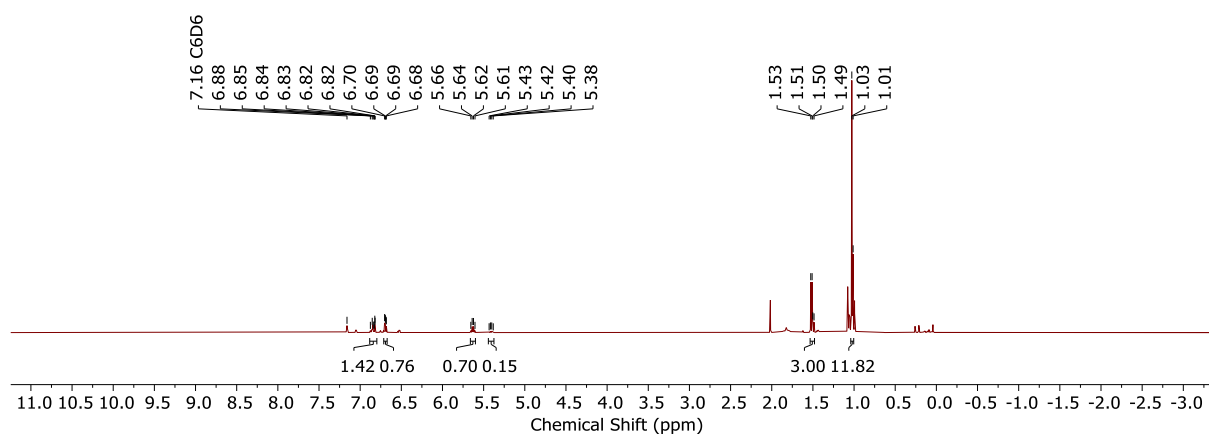

**Figure S92.**  $^1H$  NMR spectrum ( $C_6D_6$ ) of crude **24b**.

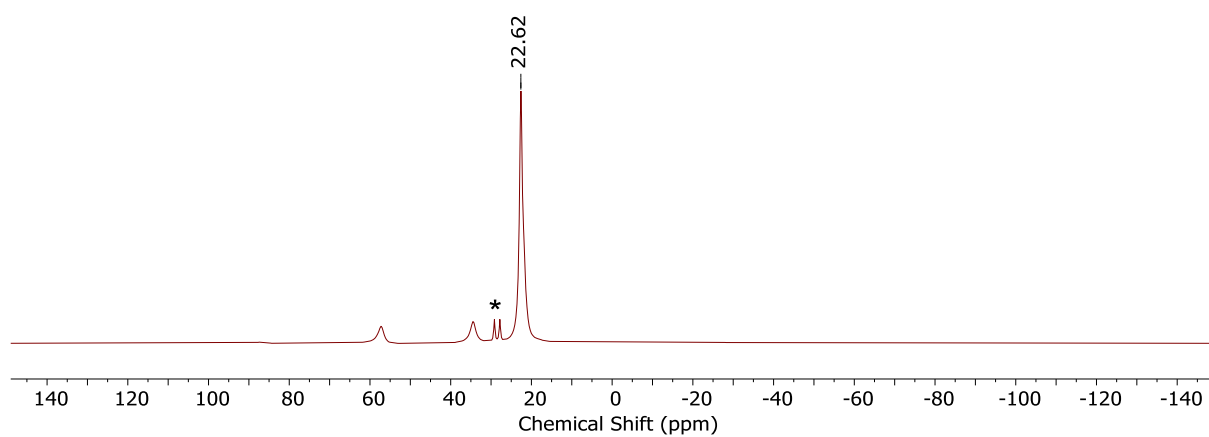



**Figure S93.**  $^{11}\text{B}$  NMR spectrum ( $\text{C}_6\text{D}_6$ ) of crude **24b**. \* = HB(pin).

6.3.5. **25b** – 4,4,5,5-tetramethyl-2-(1-(perfluorophenyl)ethoxy)-1,3,2-dioxaborolane

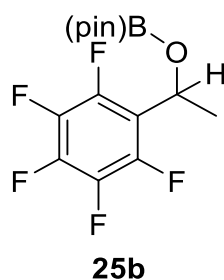

$^1\text{H}$  NMR (400 MHz, 298 K,  $\text{C}_6\text{D}_6$ ):  $\delta$  = 5.65 & 5.52 (q,  $^3J_{\text{HH}}$  = 6.7 Hz, 1H, CH), 1.44 & 1.42 (d,  $^3J_{\text{HH}}$  = 6.7 Hz, 3H,  $\text{CH}_3$ ), 1.00 & 1.09 (s, 12H, Bpin) ppm.

$^{11}\text{B}$  NMR (128 MHz, 298 K,  $\text{C}_6\text{D}_6$ ):  $\delta$  = 22.5 (s) ppm.

$^{19}\text{F}\{^1\text{H}\}$  NMR (376 MHz, 298 K,  $\text{C}_6\text{D}_6$ ):  $\delta$  = -162.9 (m, 2F, *ortho-F*), -156.3 (t,  $^3J_{\text{FF}}$  = 21.6 Hz, 1F, *para-F*), -143.4 (m, 2F, *meta-F*) ppm.

**Mass spectrometry (ESI):**  $\text{C}_{14}\text{H}_{16}\text{BF}_5\text{O}_3+\text{Na}$  ( $[\text{M}+\text{Na}]^+$ ); Calcd. = 361.10, Found = 361.00.

**Conversion:** 69%

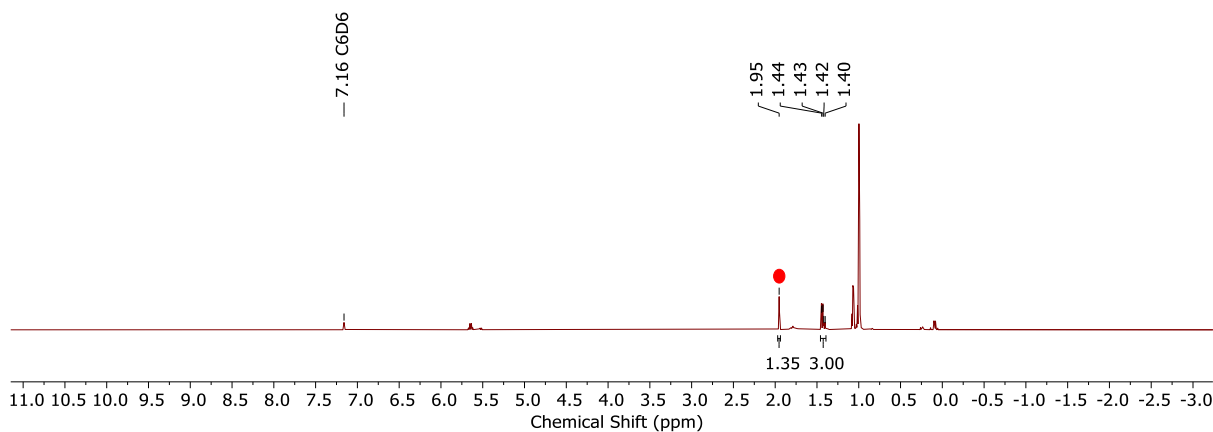

**Figure S94.**  $^1\text{H}$  NMR spectrum ( $\text{C}_6\text{D}_6$ ) of crude **25b**. ● = unreacted start material used to determine conversion.

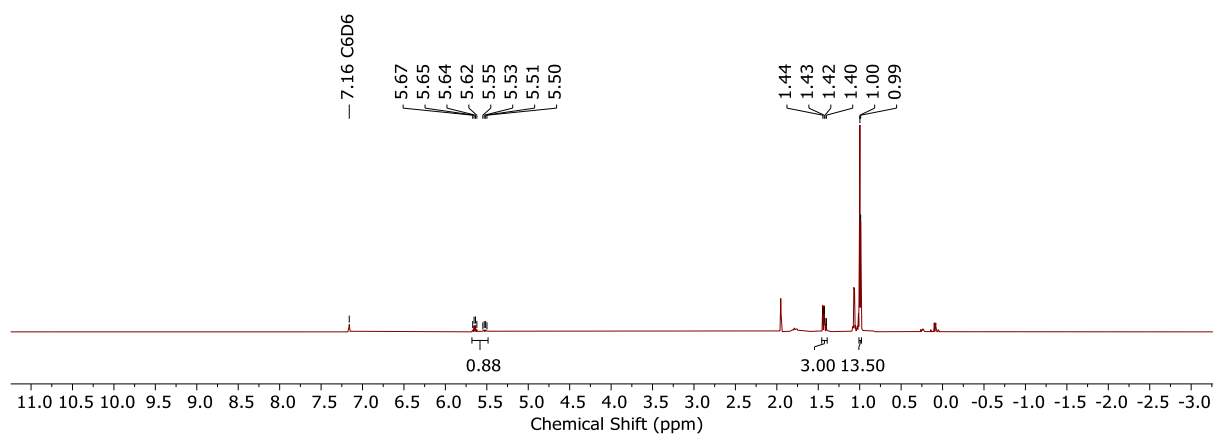

**Figure S95.**  $^1\text{H}$  NMR spectrum ( $\text{C}_6\text{D}_6$ ) of crude **25b**.

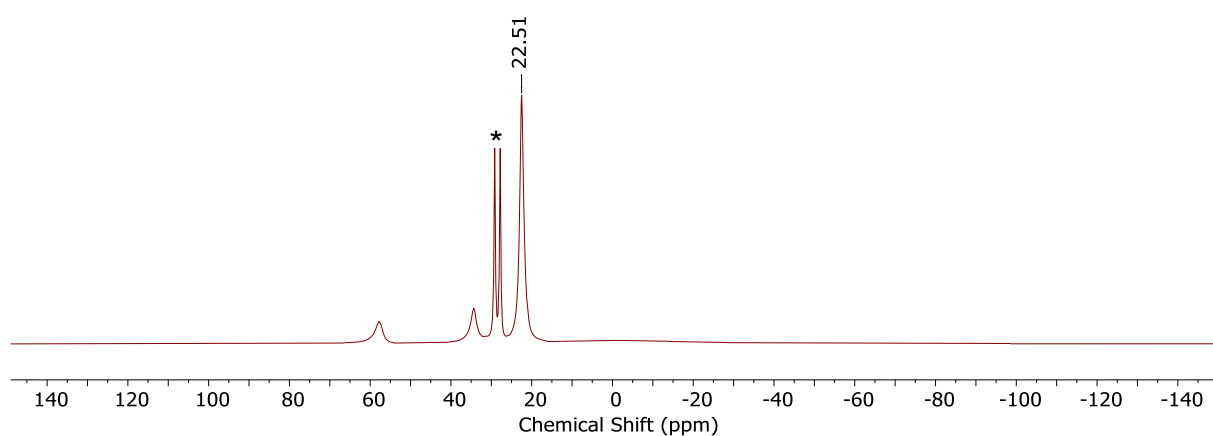

**Figure S96.**  $^{11}\text{B}$  NMR spectrum ( $\text{C}_6\text{D}_6$ ) of crude **25b**. \* = HB(pin).

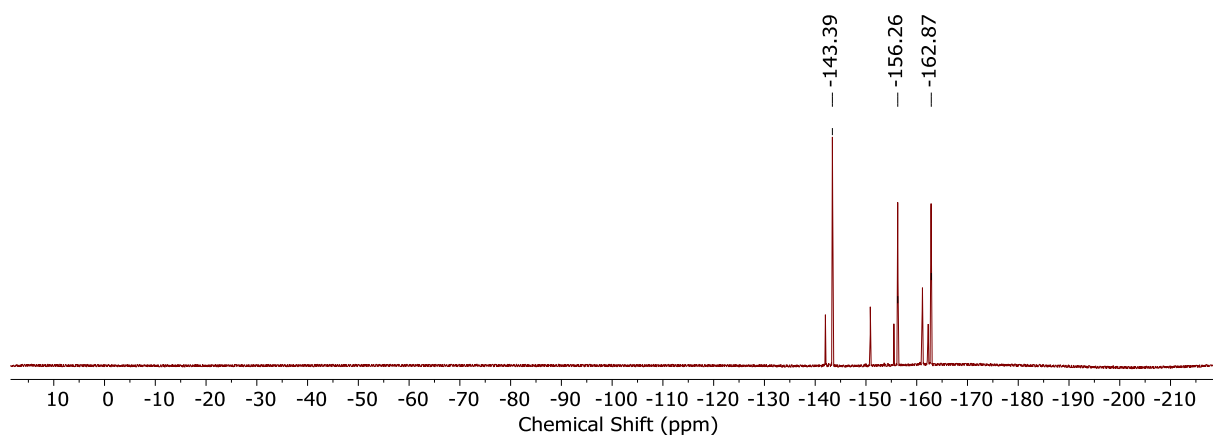

**Figure S97.**  $^{19}\text{F}\{^1\text{H}\}$  NMR spectrum ( $\text{C}_6\text{D}_6$ ) of crude **25b**.

6.3.6. **26b** - trimethyl(1-((4,4,5,5-tetramethyl-1,3,2-dioxaborolan-2-yl)oxy)ethyl)silane

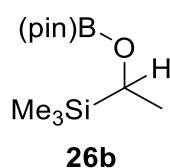

**$^1\text{H}$  NMR (400 MHz, 298 K,  $\text{C}_6\text{D}_6$ ):**  $\delta = 4.15$  (q,  $^3J_{\text{HH}} = 7.4$  Hz, 1H, CH), 1.31 (d,  $^3J_{\text{HH}} = 7.4$  Hz, 3H,  $\text{CH}_3$ ), 1.08 (s, 12H, Bpin), 0.03 (s, 9H, Si- $\text{CH}_3$ ) ppm.

**$^{11}\text{B}$  NMR (128 MHz, 298 K,  $\text{C}_6\text{D}_6$ ):**  $\delta = 22.7$  (s) ppm.

**$^{29}\text{Si}\{^1\text{H}\}$  NMR (79 MHz, 298 K,  $\text{C}_6\text{D}_6$ ):**  $\delta = 1.82$  (s) ppm.

**Mass spectrometry (APCI):**  $\text{C}_{11}\text{H}_{25}\text{BO}_3\text{Si}+\text{H}$  ( $[\text{M}+\text{H}]^+$ ); Calcd. = 245.1739, Found = 245.1747.

**Conversion:** >99%

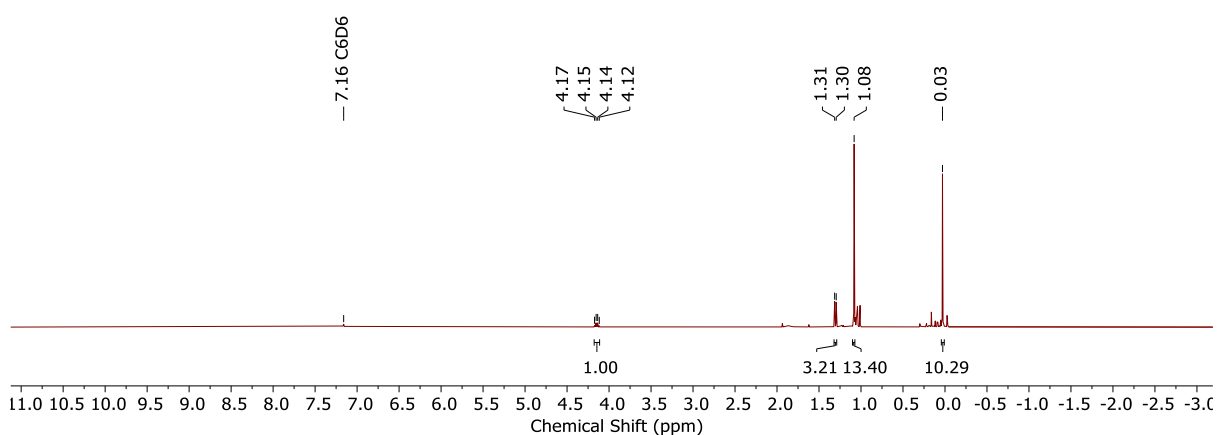

**Figure S98.**  $^1\text{H}$  NMR spectrum ( $\text{C}_6\text{D}_6$ ) of crude **26b**.

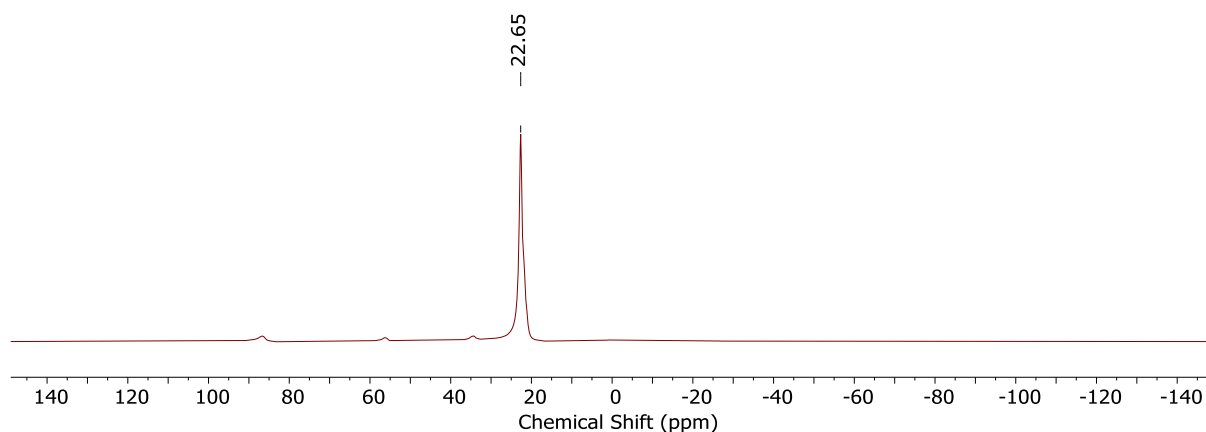

**Figure S99.**  $^{11}\text{B}$  NMR spectrum ( $\text{C}_6\text{D}_6$ ) of crude **26b**.

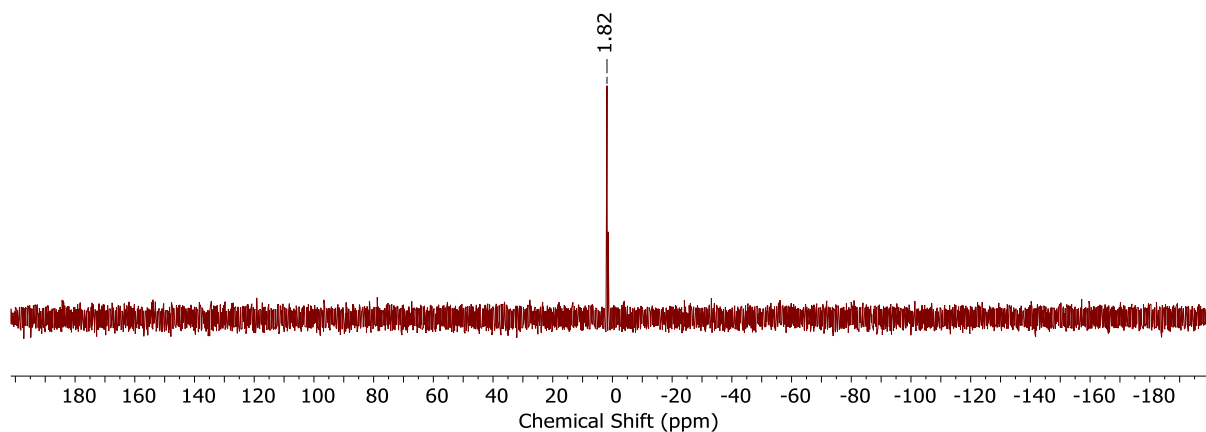

**Figure S100.**  $^{29}\text{Si}\{^1\text{H}\}$  NMR spectrum ( $\text{C}_6\text{D}_6$ ) of crude **26b**.

#### 6.4. Alkenes

We validated our analysis of hydroborated alkenes by comparison to various literature sources and found all data to be in agreement with those previously reported.<sup>16</sup>

##### 6.4.1. **7b** – 4,4,5,5-tetramethyl-2-phenethyl-1,3,2-dioxaborolane

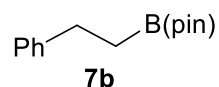

$^1\text{H}$  NMR (400 MHz, 298 K,  $\text{C}_6\text{D}_6$ ):  $\delta = 7.00 - 7.24$  (m, 5H, Ar),  $2.86$  (t,  $^3J_{\text{HH}} = 8.0$  Hz, 2H,  $\text{CH}_2$ ),  $1.27$  (t,  $^3J_{\text{HH}} = 8.0$  Hz, 2H,  $\text{CH}_2$ ),  $1.01$  (s, 12H, Bpin) ppm.

$^{11}\text{B}$  NMR (128 MHz, 298 K,  $\text{C}_6\text{D}_6$ ):  $\delta = 34.1$  (s) ppm.

Mass spectrometry (ESI):  $\text{C}_{14}\text{H}_{21}\text{BO}_2 + \text{H}$  ( $[\text{M} + \text{H}]^+$ ); Calcd. = 233.17, Found = 233.08.

Conversion: 80%

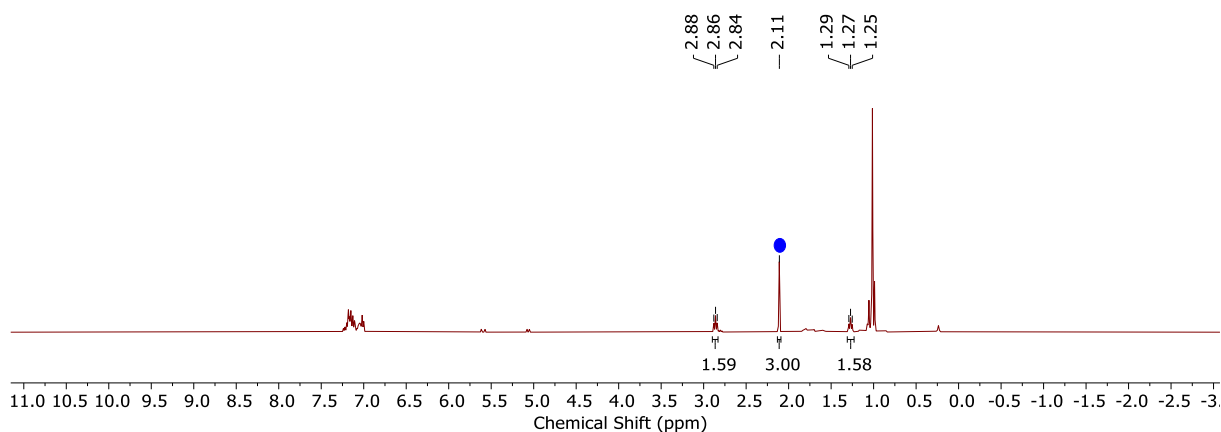

**Figure S101.**  $^1\text{H}$  NMR spectrum ( $\text{C}_6\text{D}_6$ ) of crude **7b**. ● = toluene internal standard resonance.

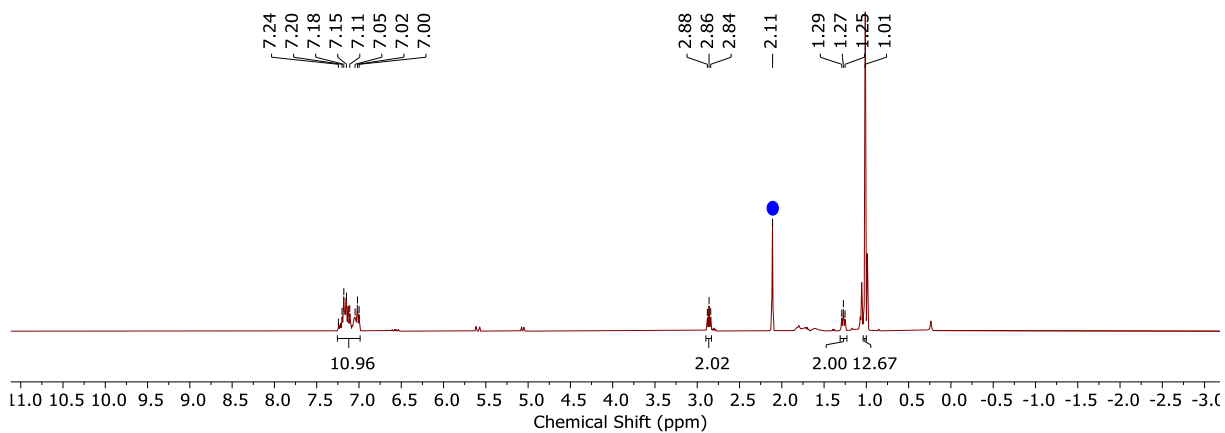

**Figure S102.**  $^1\text{H}$  NMR spectrum ( $\text{C}_6\text{D}_6$ ) of crude **7b**. ● = toluene internal standard resonance.

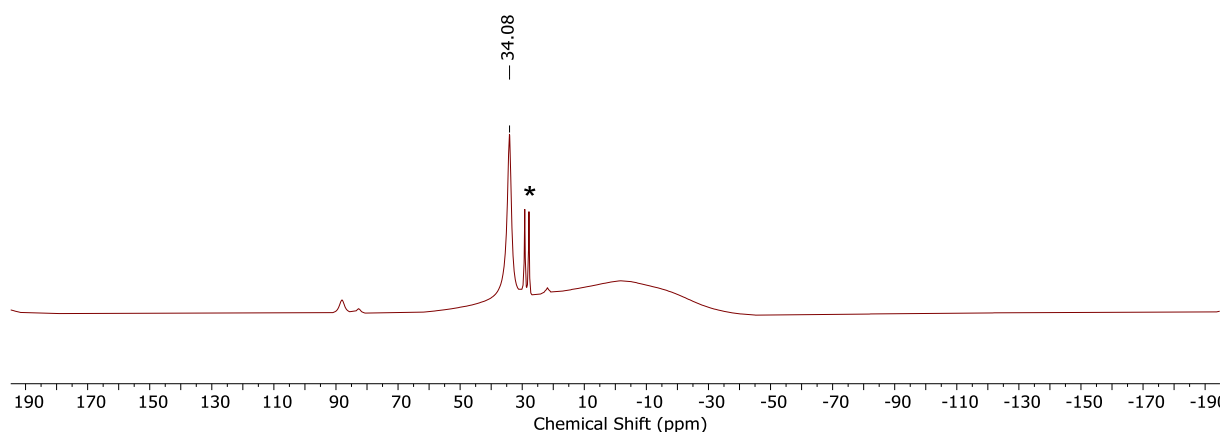

**Figure S103.**  $^{11}\text{B}$  NMR spectrum ( $\text{C}_6\text{D}_6$ ) of crude **7b**. \* = HB(pin).

#### 6.4.2. **27b** - 2-(4-bromophenethyl)-4,4,5,5-tetramethyl-1,3,2-dioxaborolane

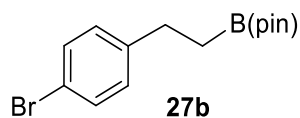

$^1\text{H}$  NMR (400 MHz, 298 K,  $\text{C}_6\text{D}_6$ ):  $\delta = 6.78 - 7.24$  (m, 4H, Ar),  $2.64$  (t,  $^3J_{\text{HH}} = 7.9$  Hz, 2H,  $\text{CH}_2$ ),  $1.12$  (t,  $^3J_{\text{HH}} = 7.9$  Hz, 2H,  $\text{CH}_2$ ),  $1.00$  (s, br, 14H, Bpin &  $\text{CH}_2$ ) ppm.

$^{11}\text{B}$  NMR (128 MHz, 298 K,  $\text{C}_6\text{D}_6$ ):  $\delta = 33.9$  (s) ppm.

Mass spectrometry (ESI):  $\text{C}_{14}\text{H}_{20}\text{BBrO}_2 + \text{H}$  ( $[\text{M} + \text{H}]^+$ ); Calcd. = 312.08, Found = 312.00.

Conversion: 78%

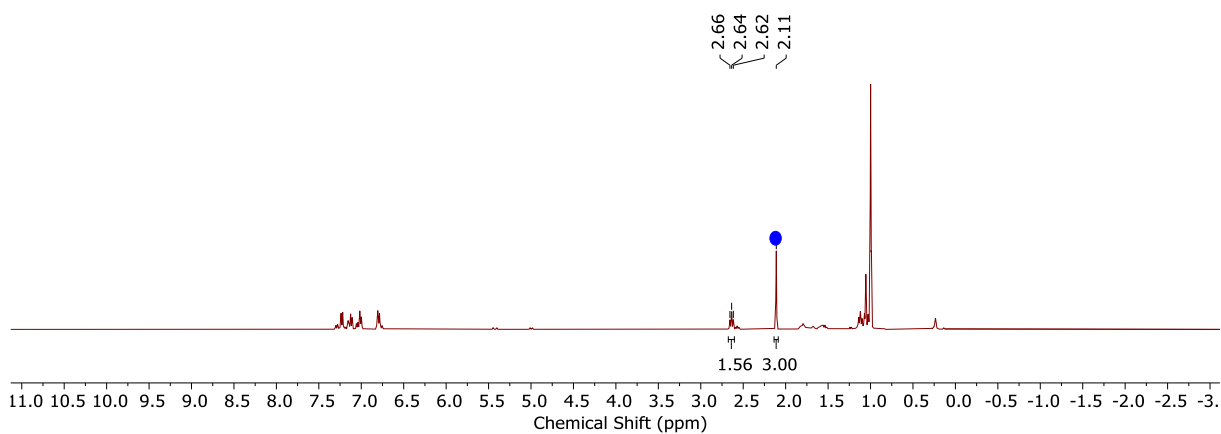

**Figure S104.**  $^1\text{H}$  NMR spectrum ( $\text{C}_6\text{D}_6$ ) of crude **27b**. ● = toluene internal standard resonance.

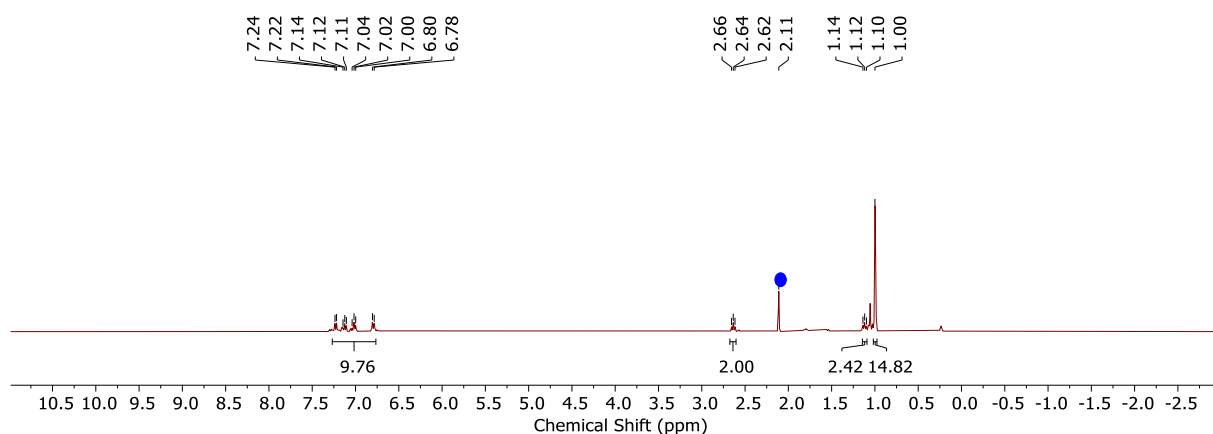

**Figure S105.**  $^1\text{H}$  NMR spectrum ( $\text{C}_6\text{D}_6$ ) of crude **27b**. ● = toluene internal standard resonance.

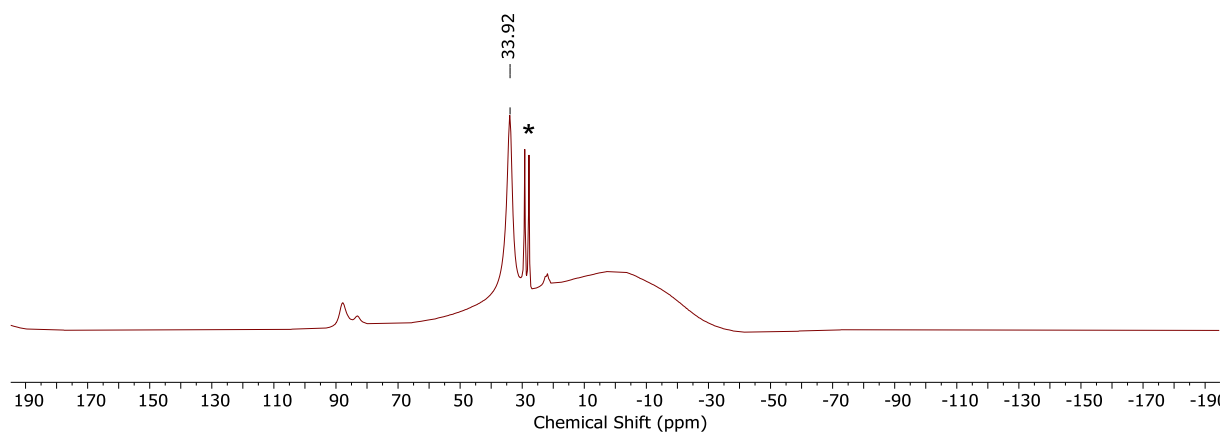

**Figure S106.**  $^{11}\text{B}$  NMR spectrum ( $\text{C}_6\text{D}_6$ ) of crude **27b**. \* = HB(pin).

6.4.3. **28b** – 2-(4-methoxyphenethyl)-4,4,5,5-tetramethyl-1,3,2-dioxaborolane

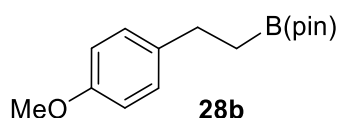

$^1\text{H}$  NMR (400 MHz, 298 K,  $\text{C}_6\text{D}_6$ ):  $\delta$  = 6.71 – 7.21 (m, 4H, Ar), 3.33 (s, 3H,  $\text{CH}_3$ ), 2.86 (t,  $^3J_{\text{HH}}$  = 7.9 Hz, 2H,  $\text{CH}_2$ ), 1.29 (t,  $^3J_{\text{HH}}$  = 7.9 Hz, 2H,  $\text{CH}_2$ ), 1.03 (s, 12H, Bpin) ppm.

$^{11}\text{B}$  NMR (128 MHz, 298 K,  $\text{C}_6\text{D}_6$ ):  $\delta$  = 34.2 (s) ppm.

Mass spectrometry (ESI):  $\text{C}_{15}\text{H}_{23}\text{BO}_3+\text{Na}$  ( $[\text{M}+\text{Na}]^+$ ); Calcd. = 285.16, Found = 285.08.

Conversion: 79%

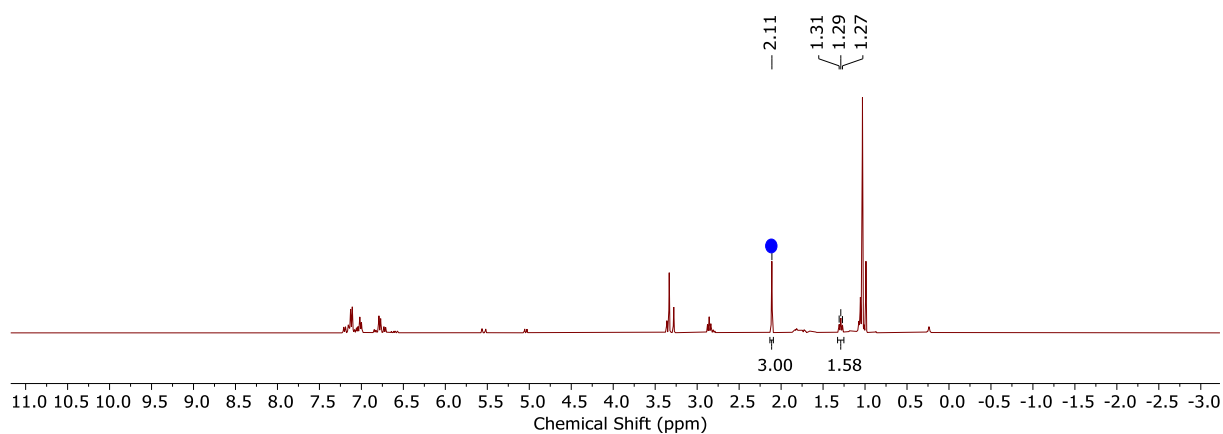

**Figure S107.**  $^1\text{H}$  NMR spectrum ( $\text{C}_6\text{D}_6$ ) of crude **28b**. ● = toluene internal standard resonance.

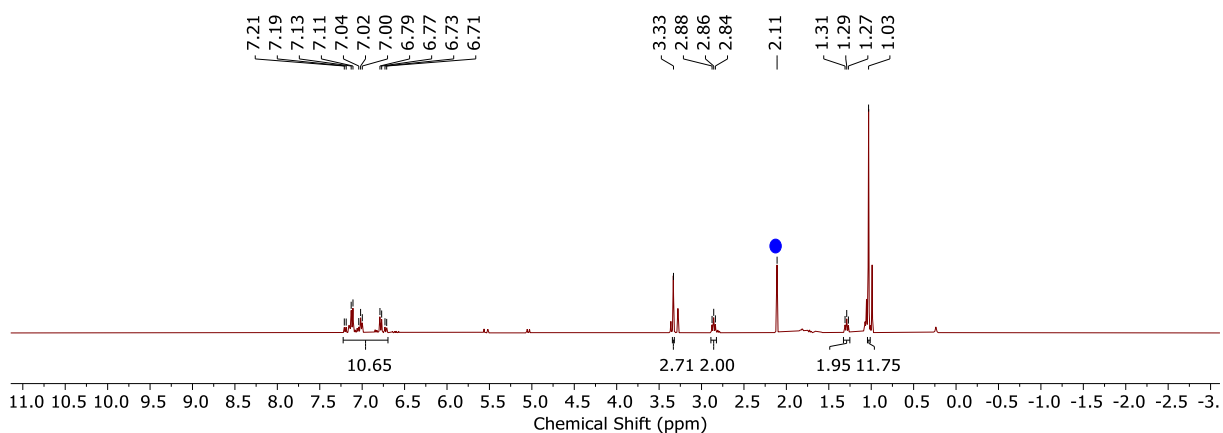

**Figure S108.**  $^1\text{H}$  NMR spectrum ( $\text{C}_6\text{D}_6$ ) of crude **28b**. ● = toluene internal standard resonance.

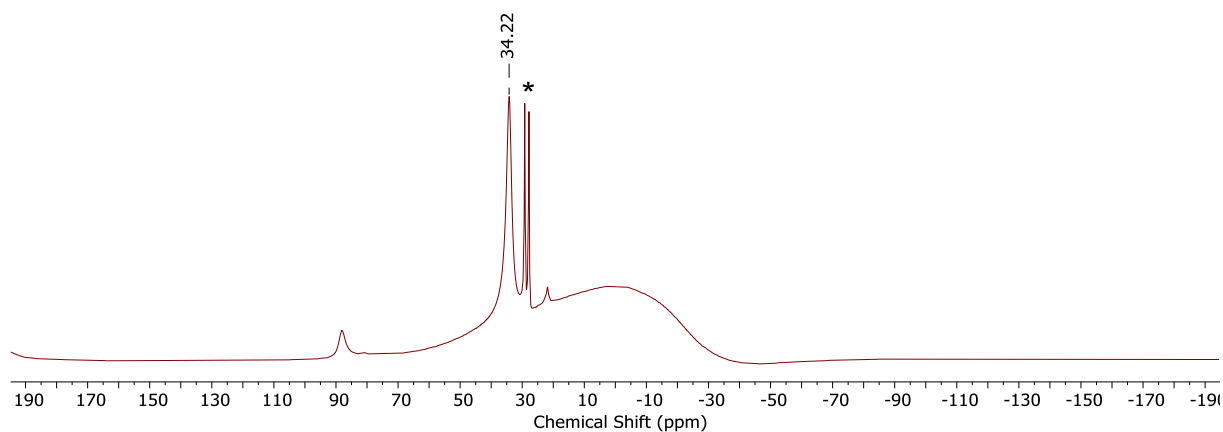

**Figure S109.**  $^{11}\text{B}$  NMR spectrum ( $\text{C}_6\text{D}_6$ ) of crude **28b**. \* = HB(pin).

6.4.4. **29b** – 4,4,5,5-tetramethyl-2-(2-(naphthalen-2-yl)ethyl)-1,3,2-dioxaborolane

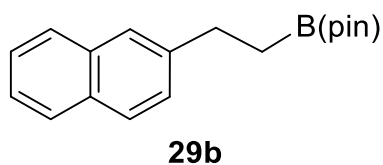

$^1\text{H}$  NMR (400 MHz, 298 K,  $\text{C}_6\text{D}_6$ ):  $\delta = 7.00 - 7.67$  (m, 7H, Ar), 3.00 (t,  $^3J_{\text{HH}} = 7.9$  Hz, 2H,  $\text{CH}_2$ ), 1.35 (t,  $^3J_{\text{HH}} = 7.9$  Hz, 2H,  $\text{CH}_2$ ), 1.01 (s, 12H, Bpin) ppm.

$^{11}\text{B}$  NMR (128 MHz, 298 K,  $\text{C}_6\text{D}_6$ ):  $\delta = 34.2$  (s) ppm.

Mass spectrometry (ESI):  $\text{C}_{18}\text{H}_{23}\text{BO}_2 + \text{H}$  ( $[\text{M} + \text{H}]^+$ ); Calcd. = 283.19, Found = 283.17.

Conversion: 76%

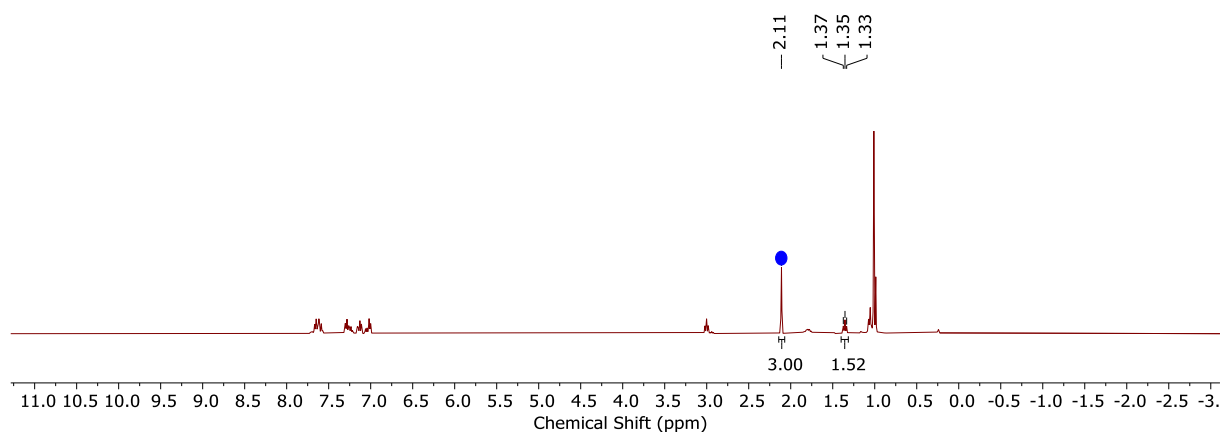

**Figure S110.**  $^1\text{H}$  NMR spectrum ( $\text{C}_6\text{D}_6$ ) of crude **29b**. ● = toluene internal standard resonance.



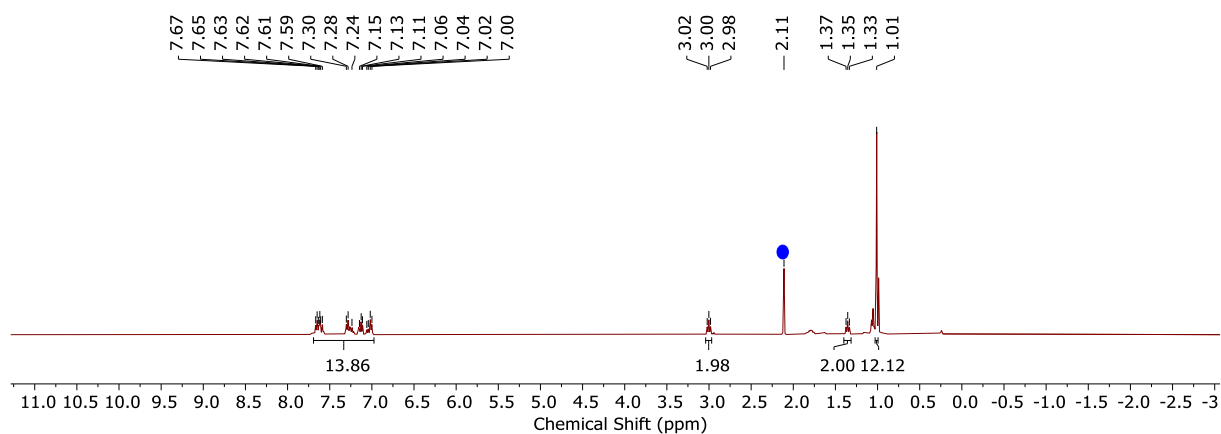

**Figure S111.**  $^1\text{H}$  NMR spectrum ( $\text{C}_6\text{D}_6$ ) of crude **29b**. ● = toluene internal standard resonance.

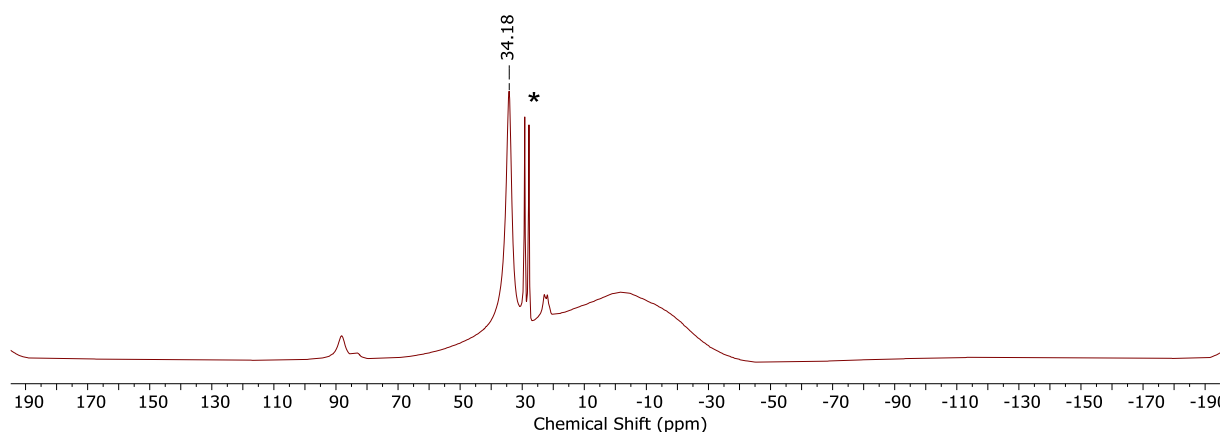

**Figure S112.**  $^{11}\text{B}$  NMR spectrum ( $\text{C}_6\text{D}_6$ ) of crude **29b**.

#### 6.4.5. **30b** – 2-(2-(4,4,5,5-tetramethyl-1,3,2-dioxaborolan-2-yl)ethyl)pyridine

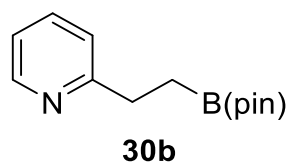

$^1\text{H}$  NMR (400 MHz, 298 K,  $\text{C}_6\text{D}_6$ ):  $\delta$  = 6.35 – 7.13 (m, 4H, Ar), 2.80 (t,  $^3J_{\text{HH}}$  = 7.4 Hz, 2H,  $\text{CH}_2$ ), 1.25 (t,  $^3J_{\text{HH}}$  = 7.4 Hz, 2H,  $\text{CH}_2$ ), unable to identify Bpin signals because of multiple overlapping resonances from unreacted HBpin.

$^{11}\text{B}$  NMR (128 MHz, 298 K,  $\text{C}_6\text{D}_6$ ):  $\delta$  = 33.7 (s, uncoordinated Bpin), 4.5 (s, tetracoordinated NBpin)] ppm.

**Mass spectrometry (ESI):**  $\text{C}_{13}\text{H}_{20}\text{BNO}_2+\text{H}$  ( $[\text{M}+\text{H}]^+$ ); Calcd. = 234.17, Found = 234.17.

Conversion: 49%

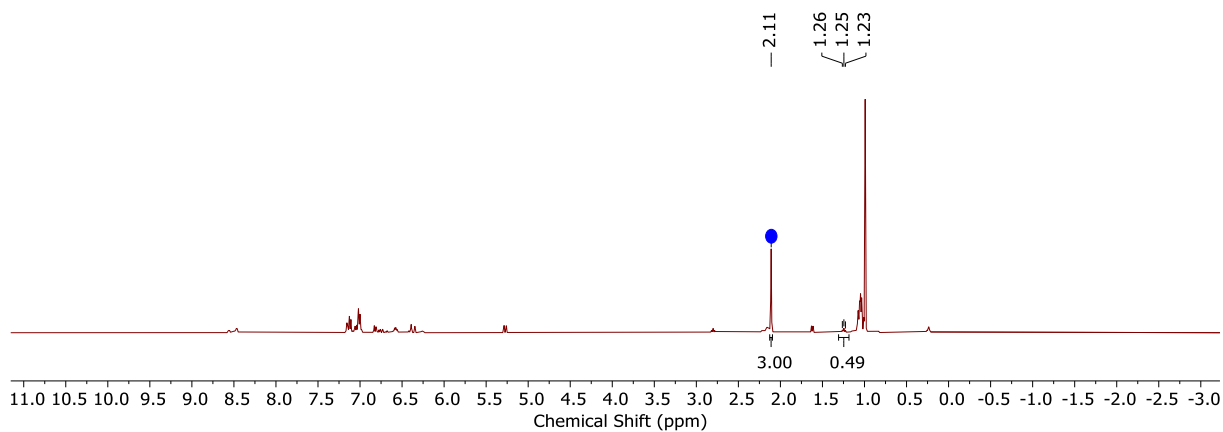

**Figure S113.**  $^1\text{H}$  NMR spectrum ( $\text{C}_6\text{D}_6$ ) of crude **30b**. ● = toluene internal standard resonance.

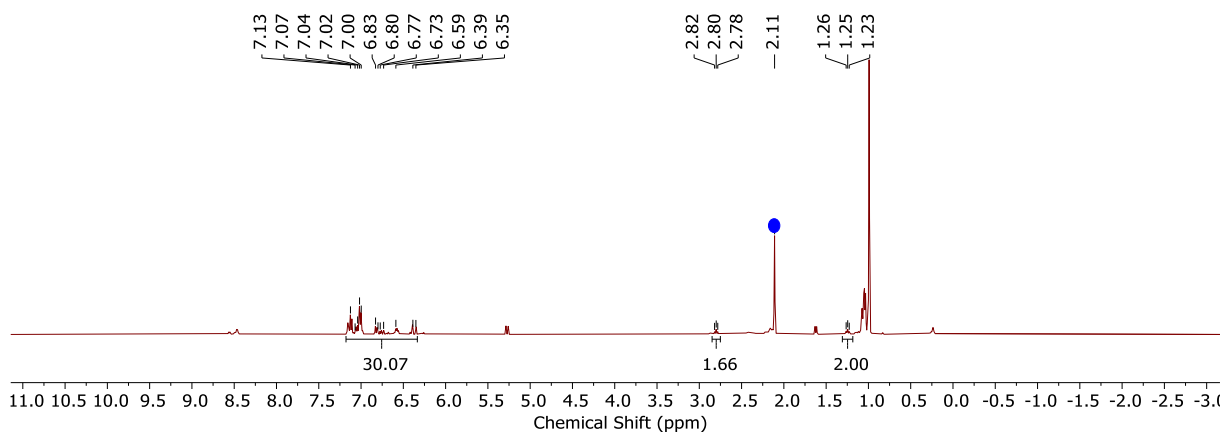

**Figure S114.**  $^1\text{H}$  NMR spectrum ( $\text{C}_6\text{D}_6$ ) of crude **30b**. ● = toluene internal standard resonance.

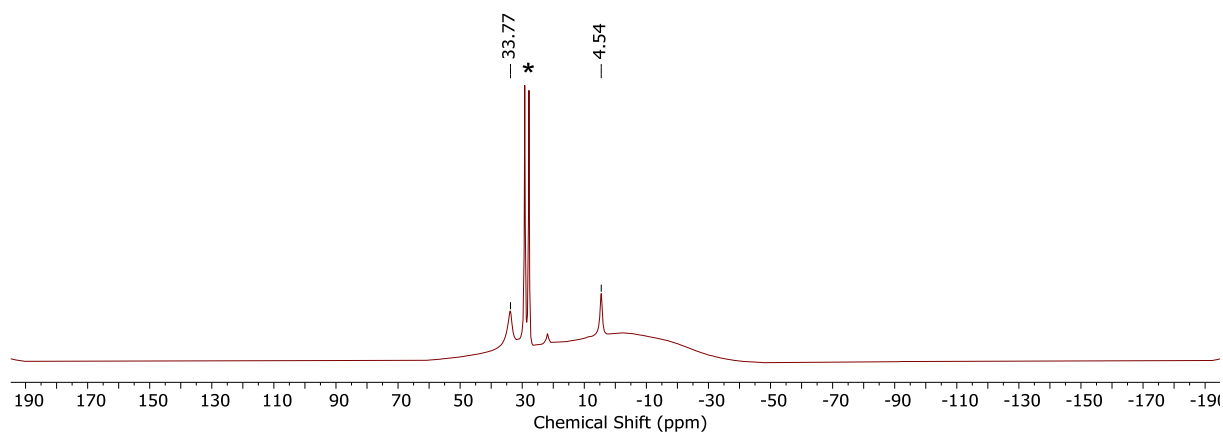

**Figure S115.**  $^{11}\text{B}$  NMR spectrum ( $\text{C}_6\text{D}_6$ ) of crude **30b**. \* = HB(pin).

6.4.6. **31b** – 9-(2-(4,4,5,5-tetramethyl-1,3,2-dioxaborolan-2-yl)ethyl)-9H-carbazole

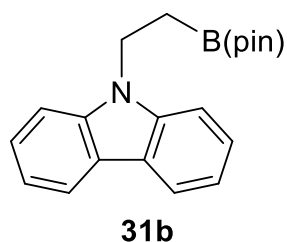

$^1\text{H}$  NMR (400 MHz, 298 K,  $\text{C}_6\text{D}_6$ ):  $\delta$  = 7.00 – 8.11 (m, 8H, Ar), 4.22 (t,  $^3J_{\text{HH}} = 8.0$  Hz, 2H,  $\text{CH}_2$ ), 1.35 (t,  $^3J_{\text{HH}} = 8.0$  Hz, 2H,  $\text{CH}_2$ ), 0.92 (s, 12H, Bpin) ppm.

$^{11}\text{B}$  NMR (128 MHz, 298 K,  $\text{C}_6\text{D}_6$ ):  $\delta$  = 33.5 (s) ppm.

Mass spectrometry (APCI):  $\text{C}_{20}\text{H}_{42}\text{BNO}_2 + \text{H}$  ( $[\text{M} + \text{H}]^+$ ); Calcd. = 322.20, Found = 322.25.

Conversion: 54%

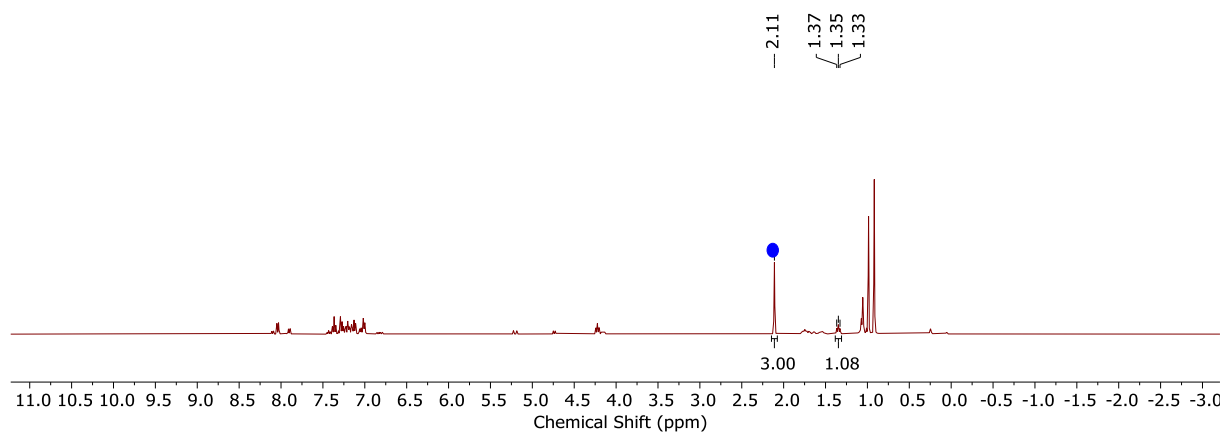

**Figure S116.**  $^1\text{H}$  NMR spectrum ( $\text{C}_6\text{D}_6$ ) of crude **31b**. ● = toluene internal standard resonance.

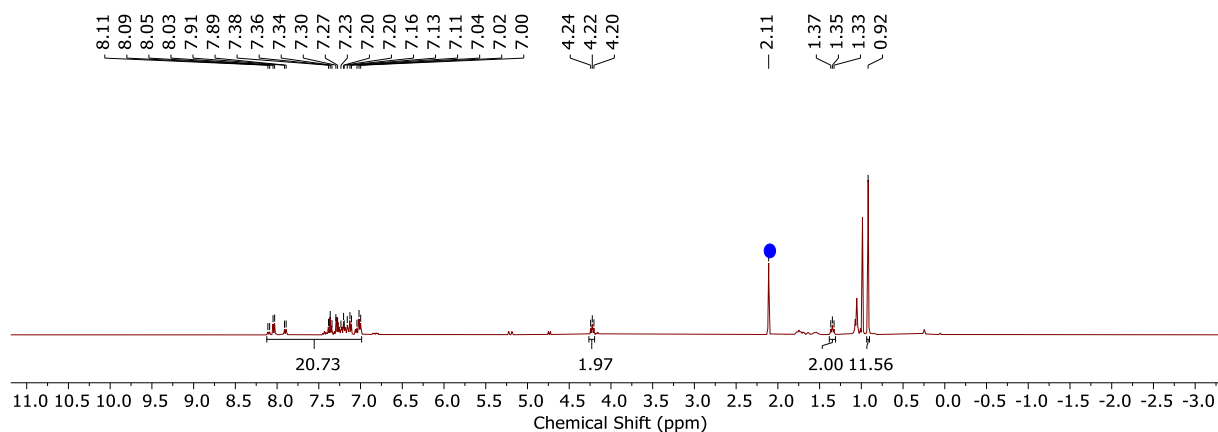

**Figure S117.**  $^1\text{H}$  NMR spectrum ( $\text{C}_6\text{D}_6$ ) of crude **31b**. • = toluene internal standard resonance.

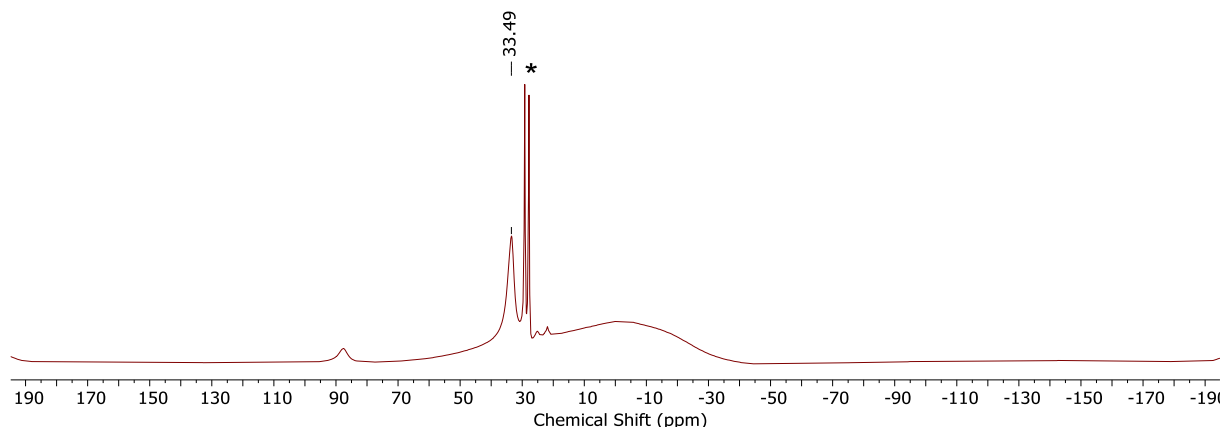

**Figure S118.**  $^{11}\text{B}$  NMR spectrum ( $\text{C}_6\text{D}_6$ ) of crude **31b**. \* = HB(pin).

## 6.5. Alkynes

We validated our analysis of hydroborated alkynes by comparison to various literature sources and found all data to be in agreement with those previously reported.<sup>17</sup>

### 6.5.1. **8b** – (E)-4,4,5,5-tetramethyl-2-styryl-1,3,2-dioxaborolane

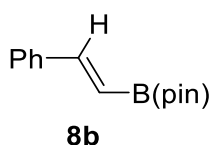

$^1\text{H}$  NMR (400 MHz, 298 K,  $\text{C}_6\text{D}_6$ ):  $\delta$  = 7.76 (d,  $^3J_{\text{HH}}$  = 18.5 Hz, 1H, CH), 6.88 – 7.31 (m, 5H, Ar), 6.46 (d,  $^3J_{\text{HH}}$  = 18.5 Hz, 1H, CH), 1.13 (s, 12H, Bpin) ppm.

$^{11}\text{B}$  NMR (128 MHz, 298 K,  $\text{C}_6\text{D}_6$ ):  $\delta$  = 30.6 (s) ppm.

Mass spectrometry (APCI):  $\text{C}_{14}\text{H}_{19}\text{BO}_2 + \text{H}$  ( $[\text{M} + \text{H}]^+$ ); Calcd. = 231.1551, Found = 231.1554.

Conversion: 79%

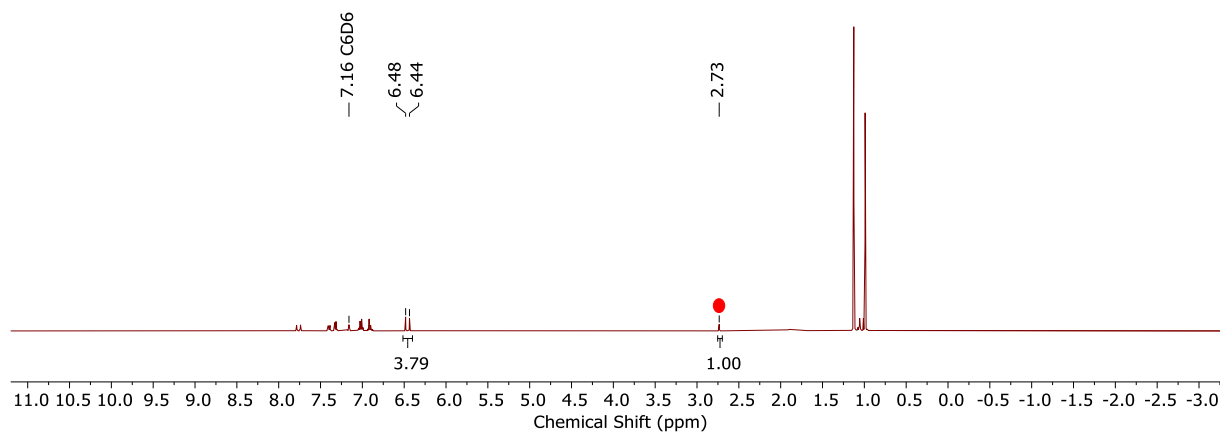

**Figure S119.**  $^1\text{H}$  NMR spectrum ( $\text{C}_6\text{D}_6$ ) of crude **8b**. • = unreacted start material used to determine conversion.

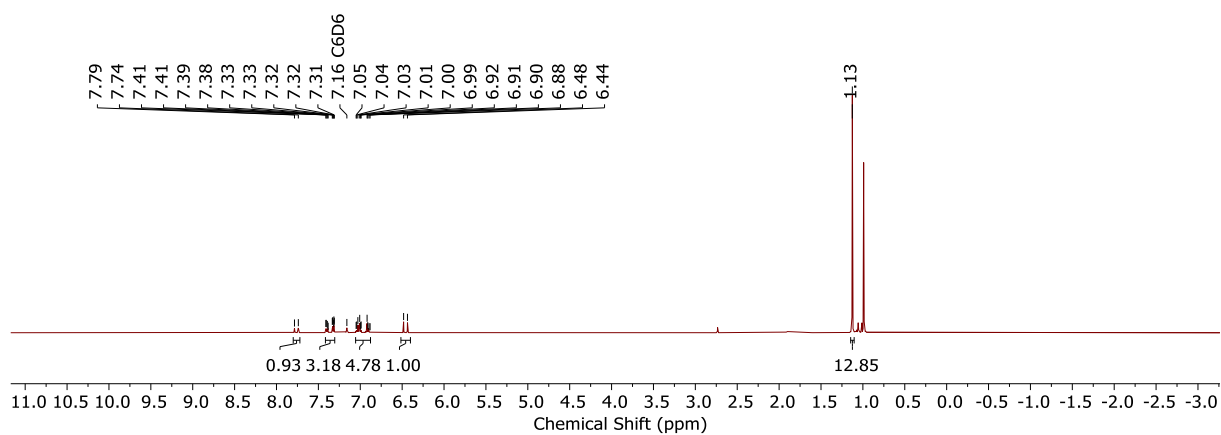

**Figure S120.**  $^1\text{H}$  NMR spectrum ( $\text{C}_6\text{D}_6$ ) of crude **8b**.

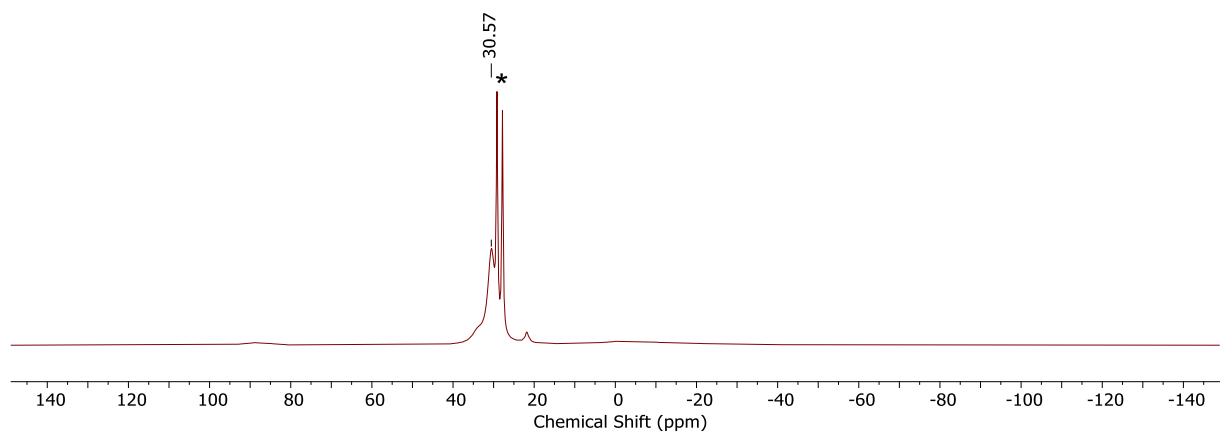

**Figure S121.**  $^{11}\text{B}$  NMR spectrum ( $\text{C}_6\text{D}_6$ ) of crude **8b**. \* = HB(pin).

6.5.2. **32b** – (E)-2-(4-fluorostyryl)-4,4,5,5-tetramethyl-1,3,2-dioxaborolane

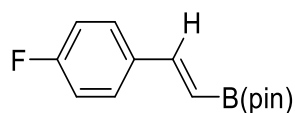

**32b**

$^1\text{H}$  NMR (400 MHz, 298 K,  $\text{C}_6\text{D}_6$ ):  $\delta$  = 7.60 (d,  $^3J_{\text{HH}}$  = 18.4 Hz, 1H, CH), 6.49 – 7.13 (m, 4H, Ar), 6.26 (d,  $^3J_{\text{HH}}$  = 18.4 Hz, 1H, CH), 1.13 (s, 12H, Bpin) ppm.

$^{11}\text{B}$  NMR (128 MHz, 298 K,  $\text{C}_6\text{D}_6$ ):  $\delta$  = 30.5 (s) ppm.

$^{19}\text{F}\{^1\text{H}\}$  NMR (376 MHz, 298 K,  $\text{C}_6\text{D}_6$ ):  $\delta$  = -112.6 (s) ppm.

Mass spectrometry (APCI):  $\text{C}_{14}\text{H}_{18}\text{O}_2\text{BF}+\text{H}$  ( $[\text{M}+\text{H}]^+$ ); Calcd. = 249.1457, Found = 249.1462.

Conversion: 80%

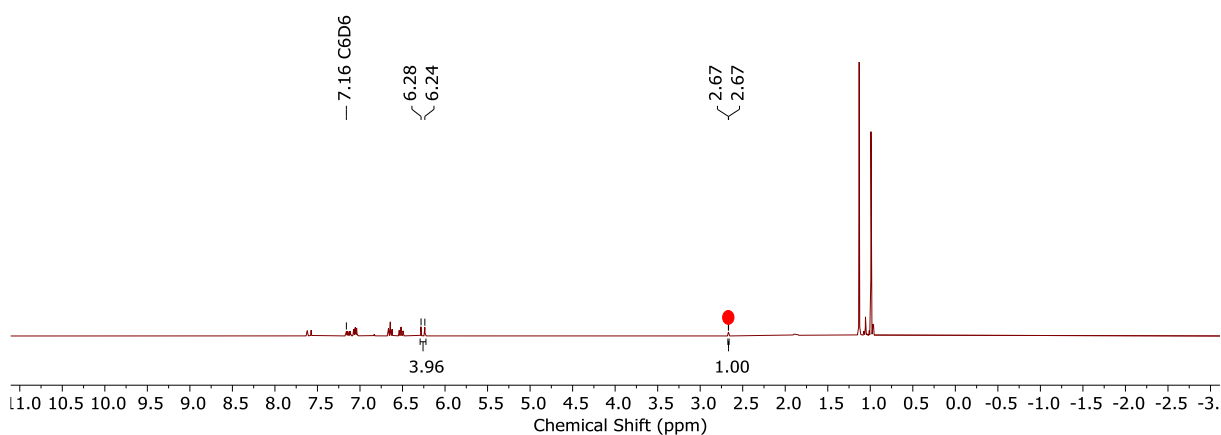

**Figure S122.**  $^1\text{H}$  NMR spectrum ( $\text{C}_6\text{D}_6$ ) of crude **32b**. ● = unreacted start material used to determine conversion.

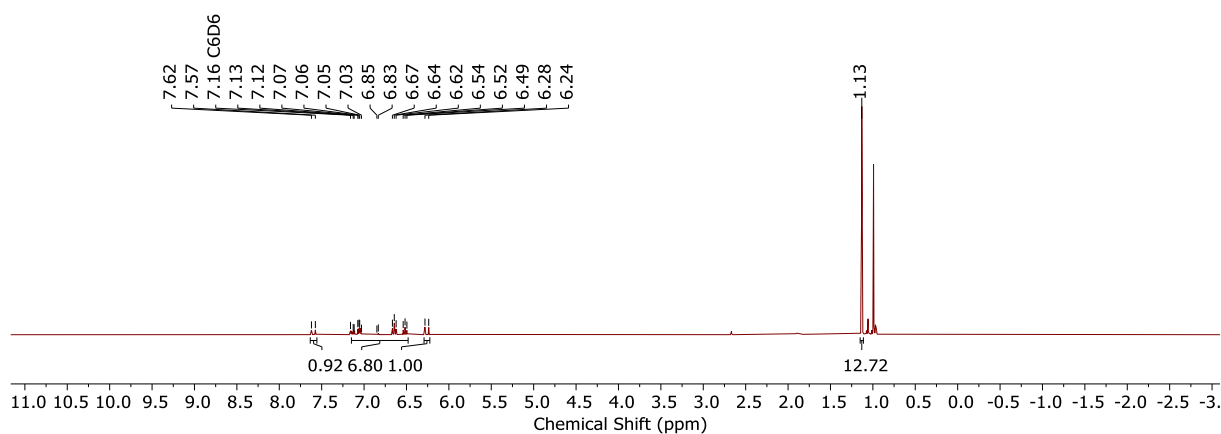

**Figure S123.**  $^1\text{H}$  NMR spectrum ( $\text{C}_6\text{D}_6$ ) of crude **32b**.

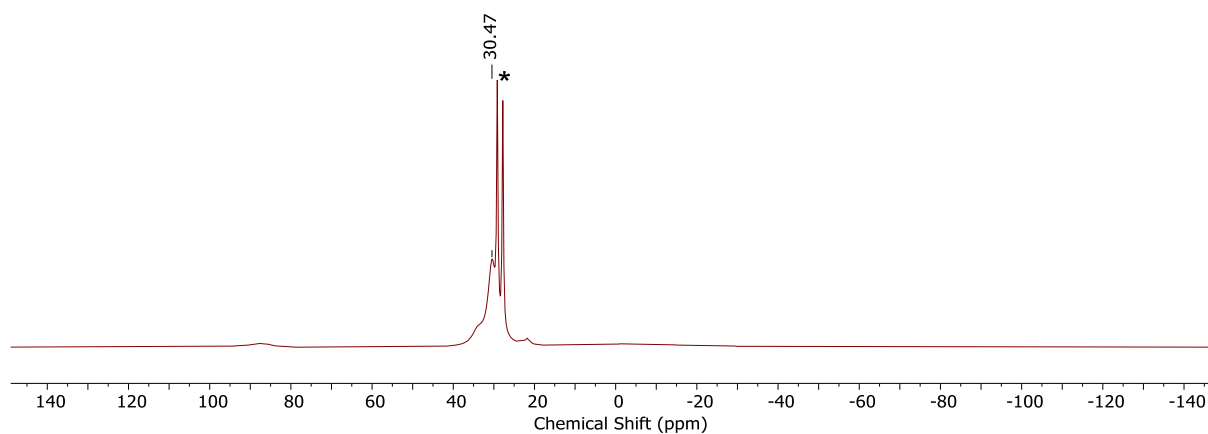

**Figure S124.**  $^{11}\text{B}$  NMR spectrum ( $\text{C}_6\text{D}_6$ ) of crude **32b**. \* = HB(pin).

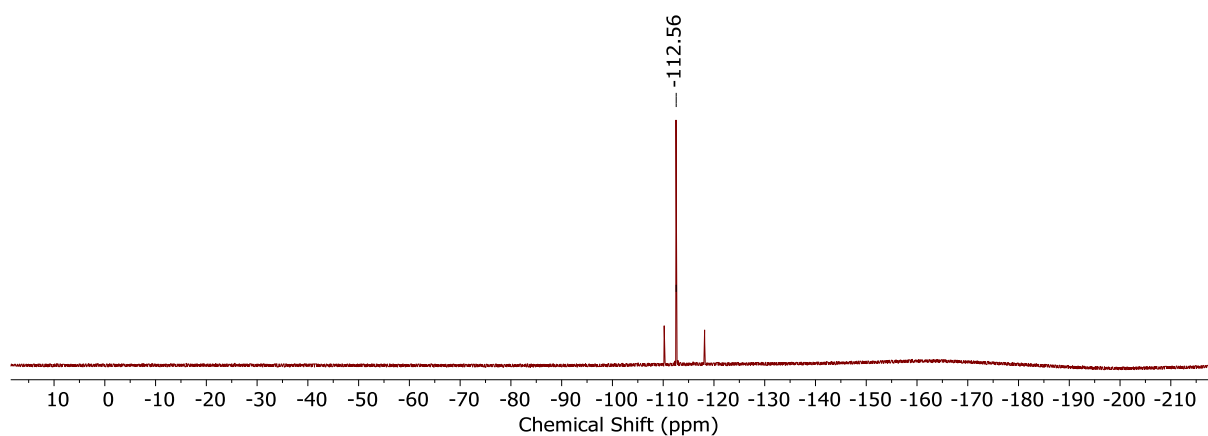

**Figure S125.**  $^{19}\text{F}\{^1\text{H}\}$  NMR spectrum ( $\text{C}_6\text{D}_6$ ) of crude **32b**.

6.5.3. **32b** – (E)-2-(4-chlorostyryl)-4,4,5,5-tetramethyl-1,3,2-dioxaborolane

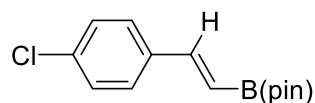

**32b**

$^1\text{H}$  NMR (400 MHz, 298 K,  $\text{C}_6\text{D}_6$ ):  $\delta$  = 7.55 (d,  $^3J_{\text{HH}}$  = 18.4 Hz, 1H, CH), 6.81 – 7.05 (m, 4H, Ar), 6.28 (d,  $^3J_{\text{HH}}$  = 18.4 Hz, 1H, CH), 1.12 (s, 12H, Bpin) ppm.

$^{11}\text{B}$  NMR (128 MHz, 298 K,  $\text{C}_6\text{D}_6$ ):  $\delta$  = 30.4 (s).

Mass spectrometry (APCI):  $\text{C}_{14}\text{H}_{18}\text{O}_2\text{BCl}+\text{H}$  ( $[\text{M}+\text{H}]^+$ ); Calcd. = 265.1161, Found = 265.1167.

Conversion: 81%

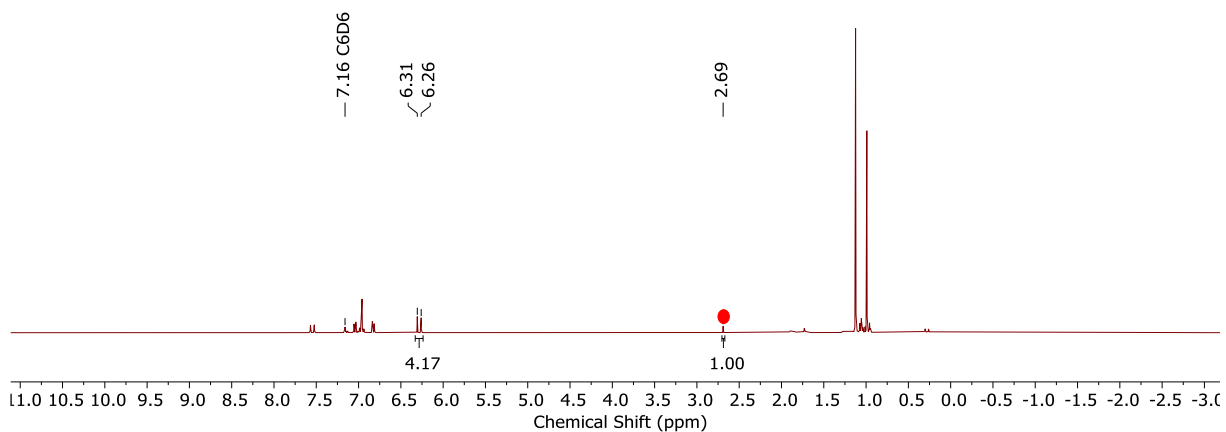

**Figure S126.**  $^1\text{H}$  NMR spectrum ( $\text{C}_6\text{D}_6$ ) of crude **33b**. ● = unreacted start material used to determine conversion.

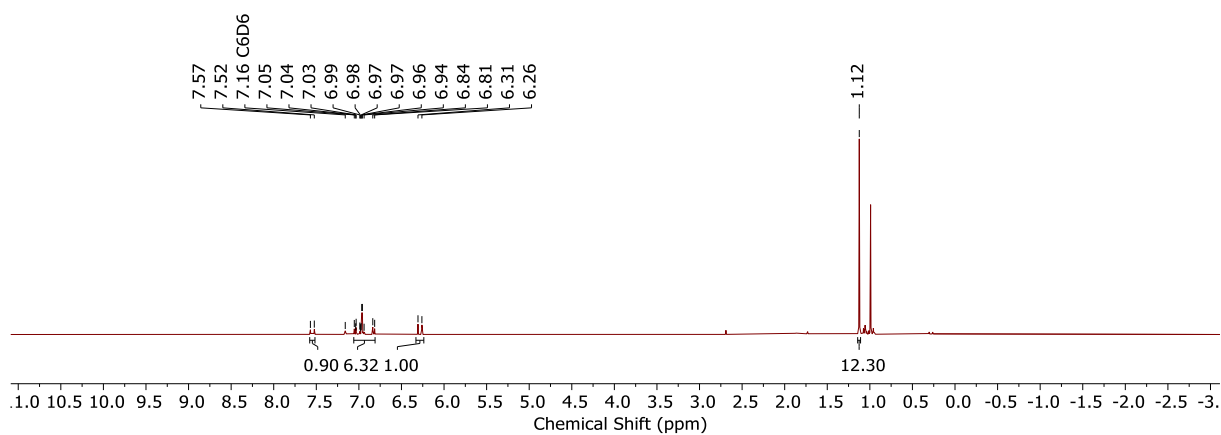

**Figure S127.**  $^1\text{H}$  NMR spectrum ( $\text{C}_6\text{D}_6$ ) of crude **33b**.

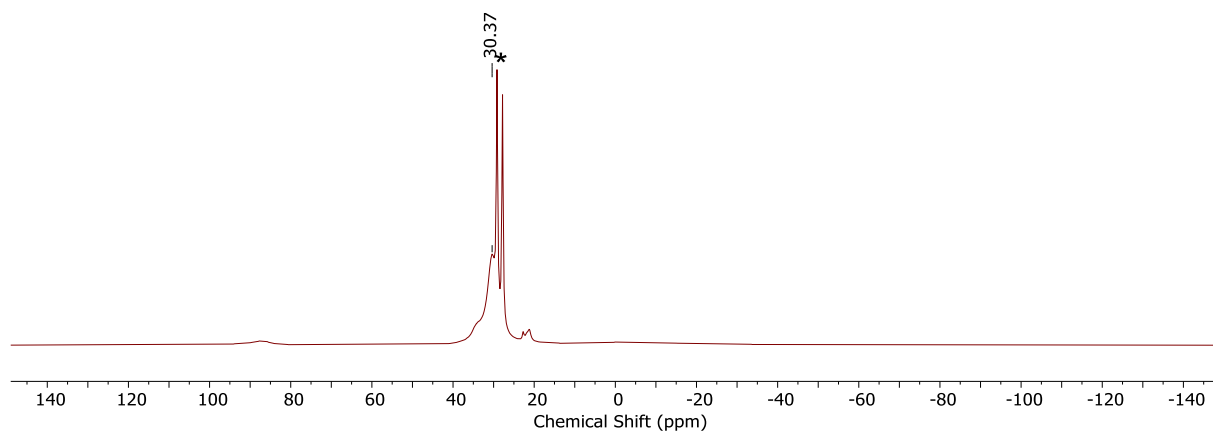

**Figure S128.**  $^{11}\text{B}$  NMR spectrum ( $\text{C}_6\text{D}_6$ ) of crude **33b**. \* = HB(pin).



6.5.4. **34b** – (E)-2-(4-bromostyryl)-4,4,5,5-tetramethyl-1,3,2-dioxaborolane

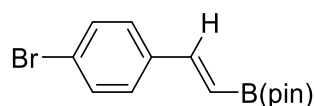

**34b**

**<sup>1</sup>H NMR (400 MHz, 298 K, C<sub>6</sub>D<sub>6</sub>):**  $\delta$  = 7.52 (d,  $^3J_{\text{HH}}$  = 18.5 Hz, 1H, CH), 6.89 – 7.12 (m, 4H, Ar), 6.29 (d,  $^3J_{\text{HH}}$  = 18.5 Hz, 1H, CH), 1.12 (s, 12H, Bpin) ppm.

**<sup>11</sup>B NMR (128 MHz, 298 K, C<sub>6</sub>D<sub>6</sub>):**  $\delta$  = 30.2 (s) ppm.

**Mass spectrometry (APCI):** C<sub>14</sub>H<sub>18</sub>O<sub>2</sub>BBR+H ([M+H]<sup>+</sup>); Calcd. = 309.0656, Found = 309.0660.

**Conversion:** 80%

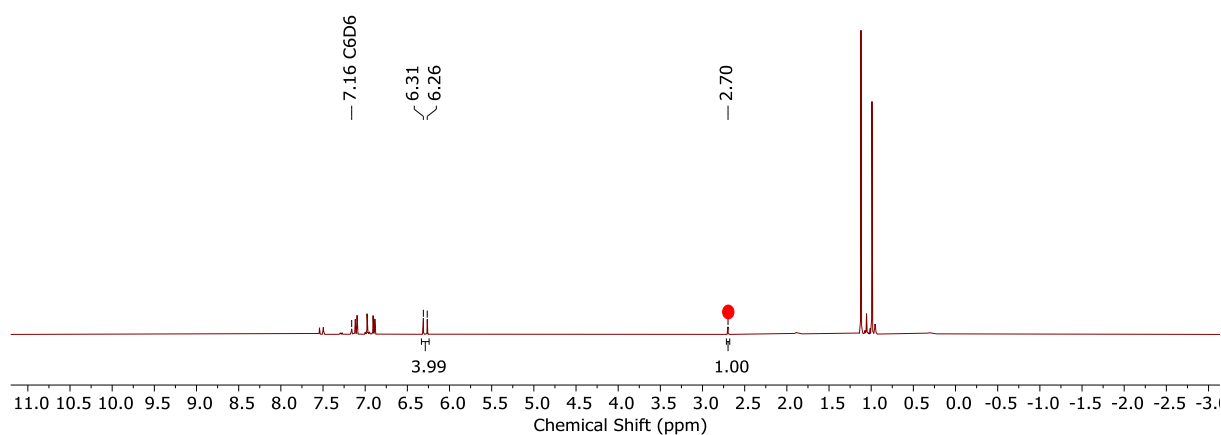

**Figure S129.** <sup>1</sup>H NMR spectrum (C<sub>6</sub>D<sub>6</sub>) of crude **34b**. ● = unreacted start material used to determine conversion.

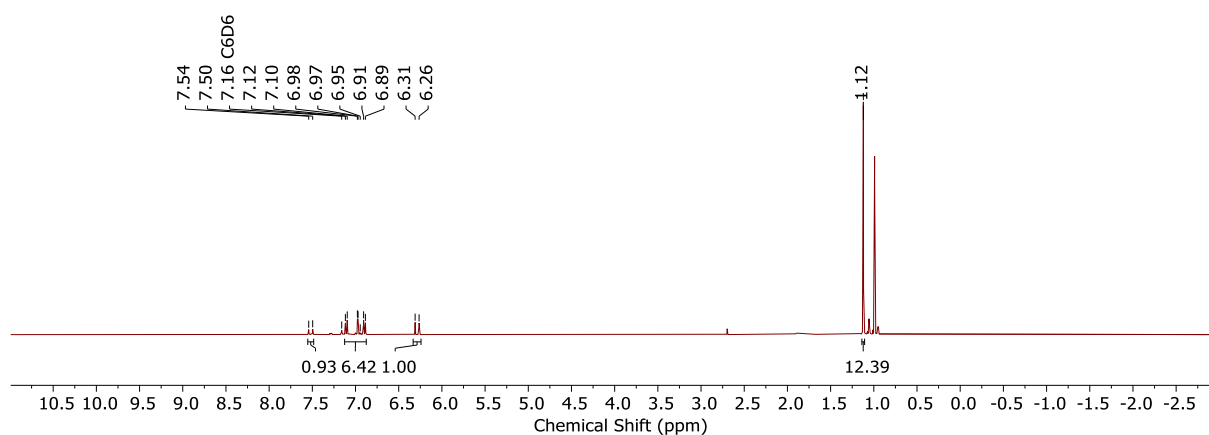

**Figure S130.** <sup>1</sup>H NMR spectrum (C<sub>6</sub>D<sub>6</sub>) of crude **34b**.

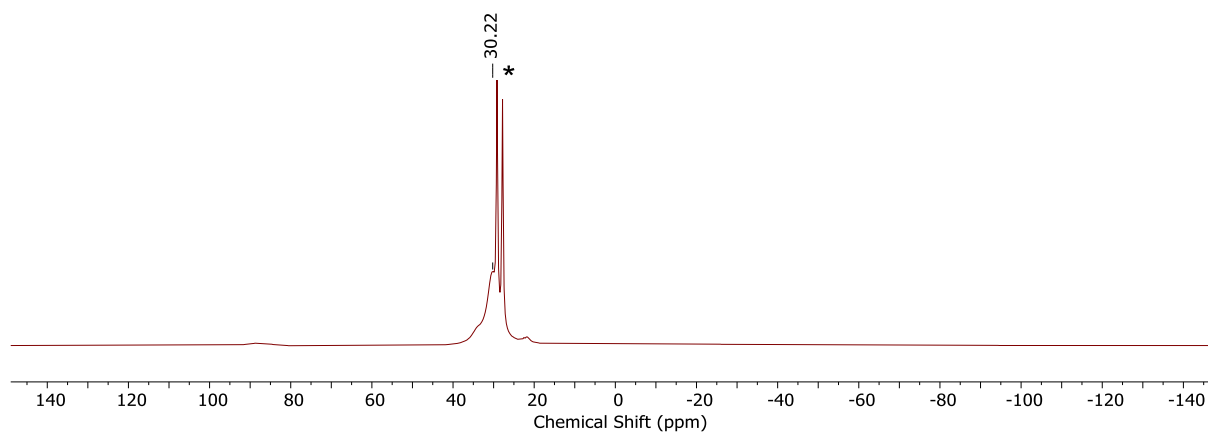

**Figure S131.**  $^{11}\text{B}$  NMR spectrum ( $\text{C}_6\text{D}_6$ ) of crude **34b**. \* = HB(pin).

6.5.5. **35b** – (E)-4,4,5,5-tetramethyl-2-(4-(trifluoromethyl)styryl)-1,3,2-dioxaborolane

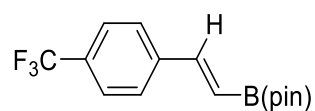

**35b**

$^1\text{H}$  NMR (400 MHz, 298 K,  $\text{C}_6\text{D}_6$ ):  $\delta$  = 7.55 (d,  $^3J_{\text{HH}}$  = 18.3 Hz, 1H, CH), 7.04 – 7.20 (m, 4H, Ar), 6.35 (d,  $^3J_{\text{HH}}$  = 18.3 Hz, 1H, CH), 1.13 (s, 12H, Bpin) ppm.

$^{11}\text{B}$  NMR (128 MHz, 298 K,  $\text{C}_6\text{D}_6$ ):  $\delta$  = 30.2 (s) ppm.

$^{19}\text{F}\{^1\text{H}\}$  NMR (376 MHz, 298 K,  $\text{C}_6\text{D}_6$ ):  $\delta$  = -62.4 (s) ppm.

**Mass spectrometry (APCI):**  $\text{C}_{15}\text{H}_{18}\text{O}_2\text{BF}_3 + \text{H}$  ( $[\text{M} + \text{H}]^+$ ); Calcd. 299.1425, Found = 299.1428.

**Conversion:** 76%

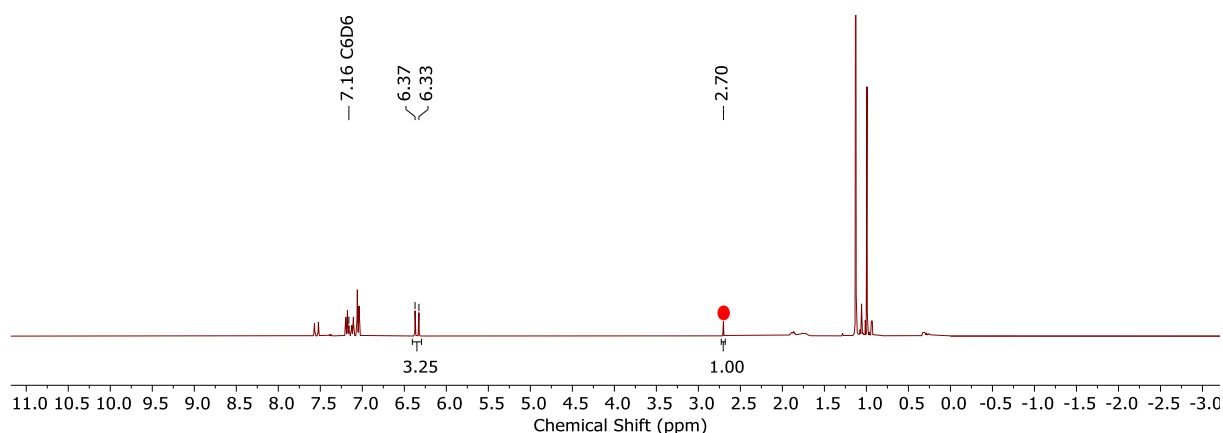

**Figure S132.**  $^1\text{H}$  NMR spectrum ( $\text{C}_6\text{D}_6$ ) of crude **35b**. ● = unreacted start material used to determine conversion.

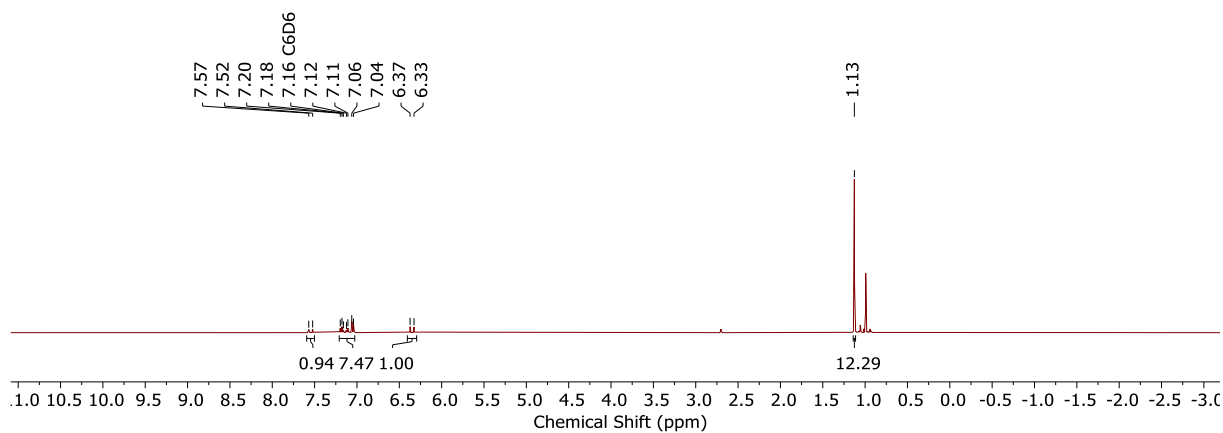

**Figure S133.**  $^1\text{H}$  NMR spectrum ( $\text{C}_6\text{D}_6$ ) of crude **35b**.

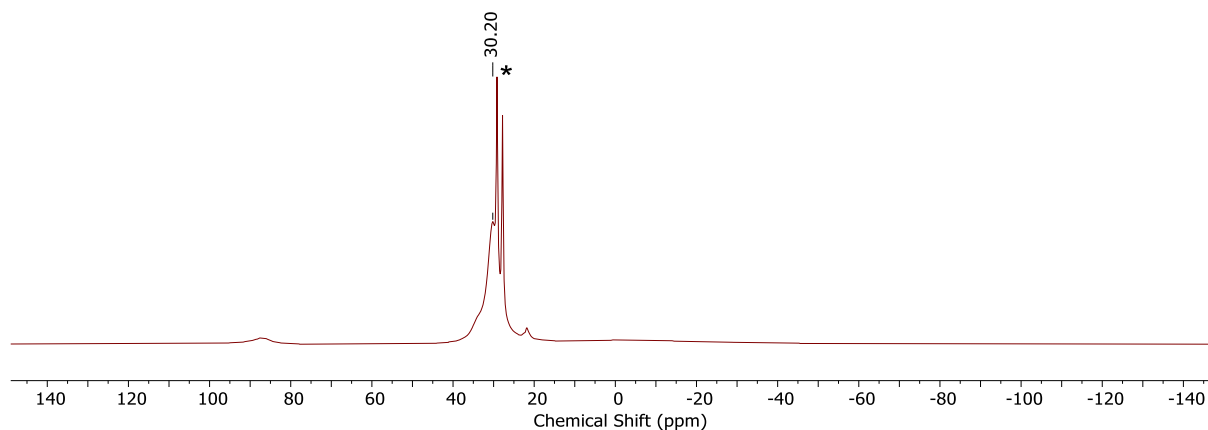

**Figure S134.**  $^{11}\text{B}$  NMR spectrum ( $\text{C}_6\text{D}_6$ ) of crude **35b**. \* = HB(pin).

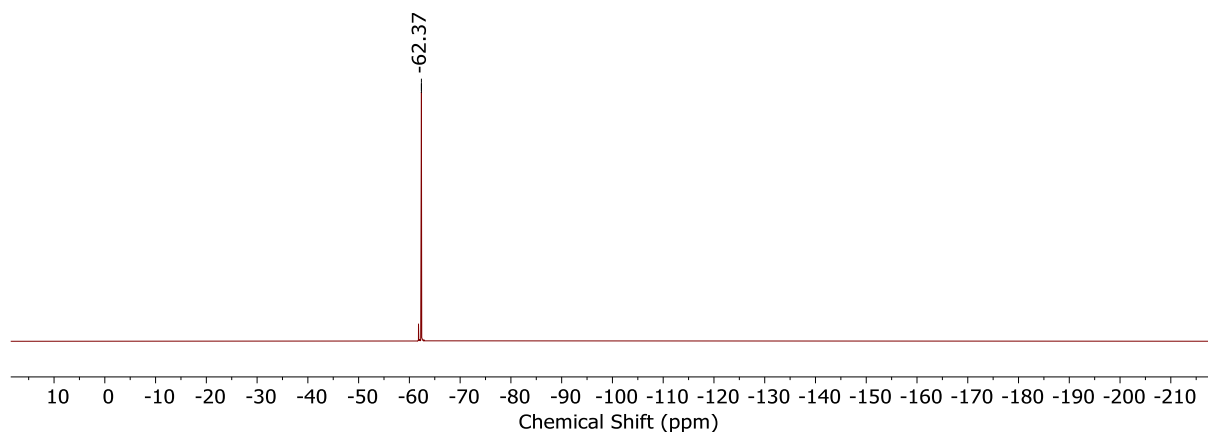

**Figure S135.**  $^{19}\text{F}\{^1\text{H}\}$  NMR spectrum ( $\text{C}_6\text{D}_6$ ) of crude **35b**.

6.5.6. **36b** – (E)-2-(4-methoxystyryl)-4,4,5,5-tetramethyl-1,3,2-dioxaborolane

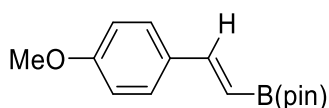

**36b**

$^1\text{H}$  NMR (400 MHz, 298 K,  $\text{C}_6\text{D}_6$ ):  $\delta = 7.77$  (d,  $^3J_{\text{HH}} = 18.3$  Hz, 1H, CH), 7.29 (d,  $^3J_{\text{HH}} = 9.0$  Hz, 2H, Ar), 6.62 (d,  $^3J_{\text{HH}} = 9.0$  Hz, 2H, Ar), 6.36 (d,  $^3J_{\text{HH}} = 18.3$  Hz, 1H, CH), 3.22 (s, 3H,  $\text{CH}_3$ ), 1.15 (s, 12H, Bpin) ppm.

$^{11}\text{B}$  NMR (128 MHz, 298 K,  $\text{C}_6\text{D}_6$ ):  $\delta = 30.6$  (s) ppm.

Mass spectrometry (APCI):  $\text{C}_{15}\text{H}_{21}\text{O}_3\text{B}+\text{H}$  ( $[\text{M}+\text{H}]^+$ ); Calcd. = 261.1657, Found = 261.1663.

Conversion: 87%

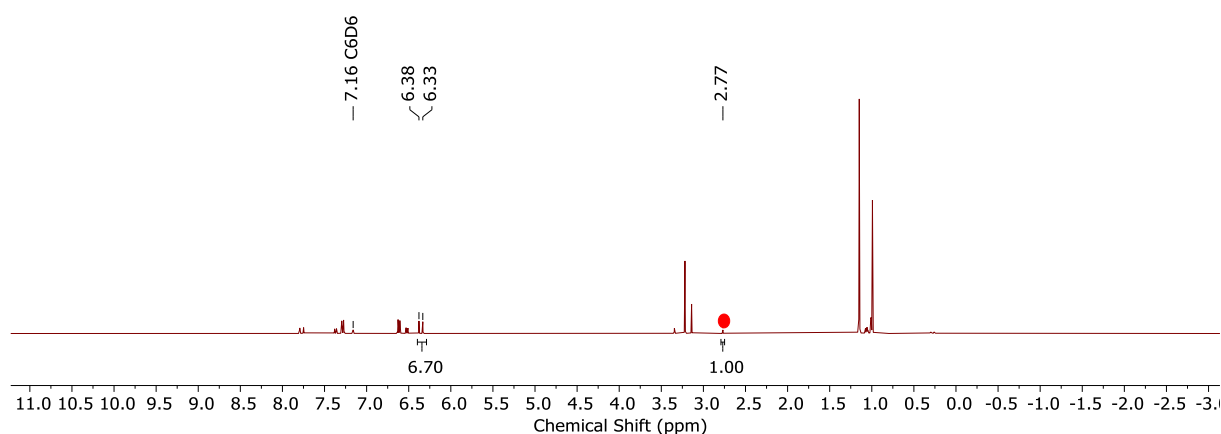

**Figure S136.**  $^1\text{H}$  NMR spectrum ( $\text{C}_6\text{D}_6$ ) of crude **36b**. ● = unreacted start material used to determine conversion.

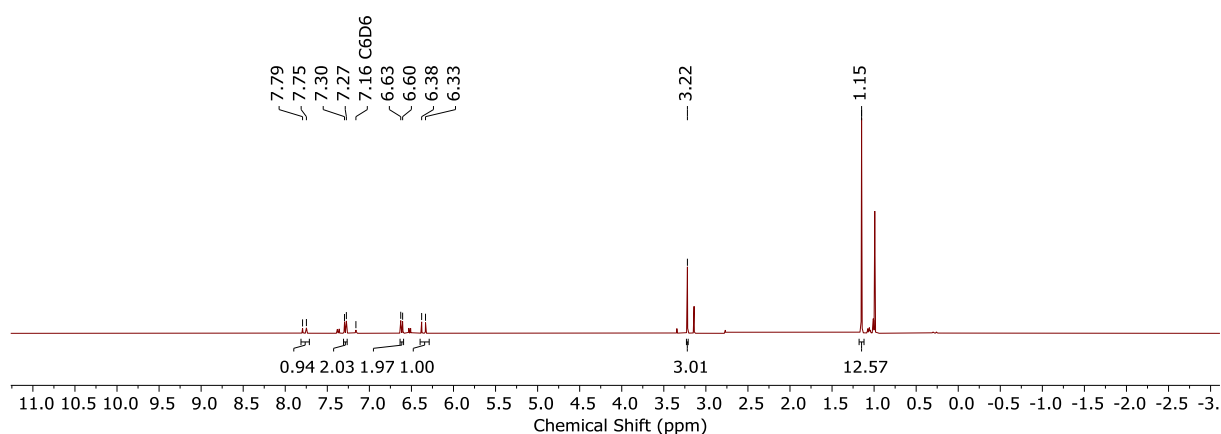

**Figure S137.**  $^1\text{H}$  NMR spectrum ( $\text{C}_6\text{D}_6$ ) of crude **36b**.

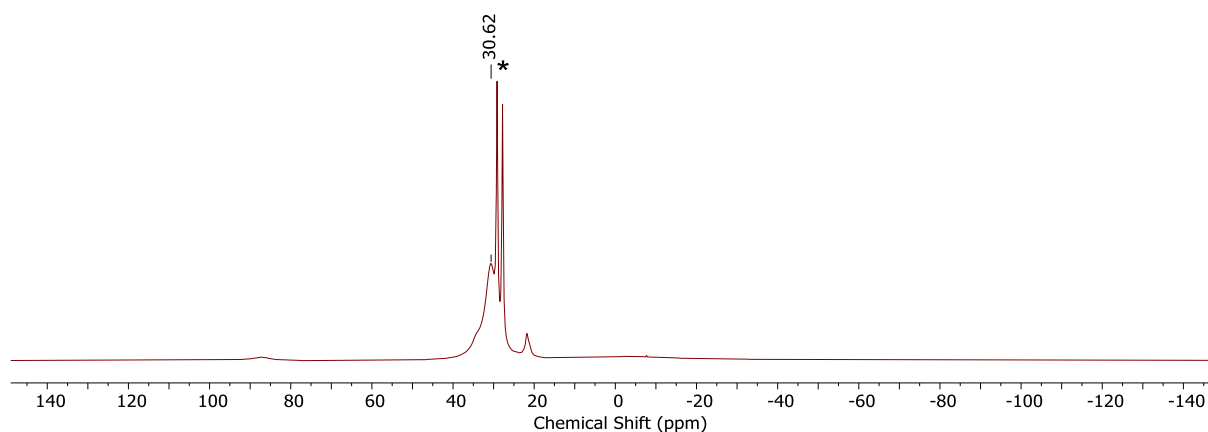

**Figure S138.**  $^{11}\text{B}$  NMR spectrum ( $\text{C}_6\text{D}_6$ ) of crude **36b**. \* = HB(pin).

6.5.7. **37b** – (E)-4,4,5,5-tetramethyl-2-(4-methylstyryl)-1,3,2-dioxaborolane

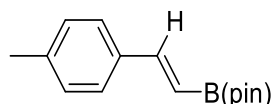

**37b**

$^1\text{H}$  NMR (400 MHz, 298 K,  $\text{C}_6\text{D}_6$ ):  $\delta$  = 7.79 (d,  $^3J_{\text{HH}}$  = 18.3 Hz, 1H, CH), 7.29 (d,  $^3J_{\text{HH}}$  = 7.9 Hz, 2H, Ar), 6.86 (d,  $^3J_{\text{HH}}$  = 7.9 Hz, Ar), 6.46 (d,  $^3J_{\text{HH}}$  = 18.3 Hz, 1H, CH), 2.02 (s, 3H,  $\text{CH}_3$ ), 1.14 (s, 12H, Bpin) ppm.

$^{11}\text{B}$  NMR (128 MHz, 298 K,  $\text{C}_6\text{D}_6$ ):  $\delta$  = 30.6 (s) ppm.

Mass spectrometry (ESI):  $\text{C}_{15}\text{H}_{21}\text{BO}_2 + \text{H}$  ( $[\text{M} + \text{H}]^+$ ); Calcd. = 245.17, Found = 244.83.

Conversion: 90%

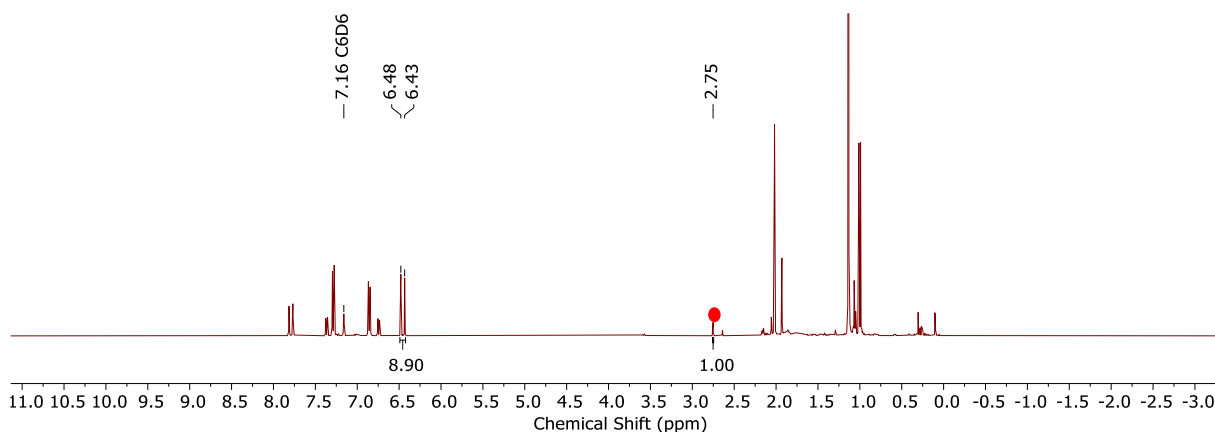

**Figure S139.**  $^1\text{H}$  NMR spectrum ( $\text{C}_6\text{D}_6$ ) of crude **37b**. ● = unreacted start material used to determine conversion.

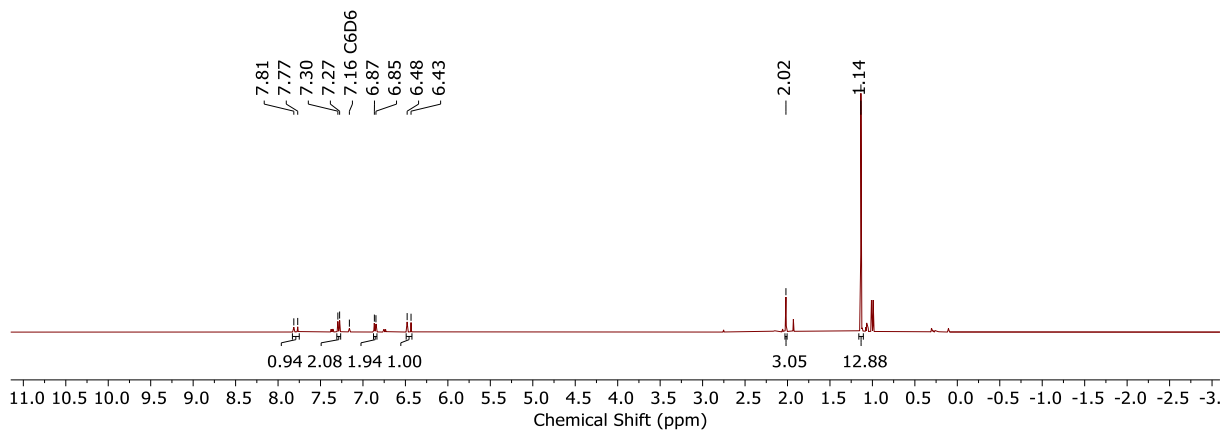

**Figure S140.**  $^1\text{H}$  NMR spectrum ( $\text{C}_6\text{D}_6$ ) of crude **37b**.

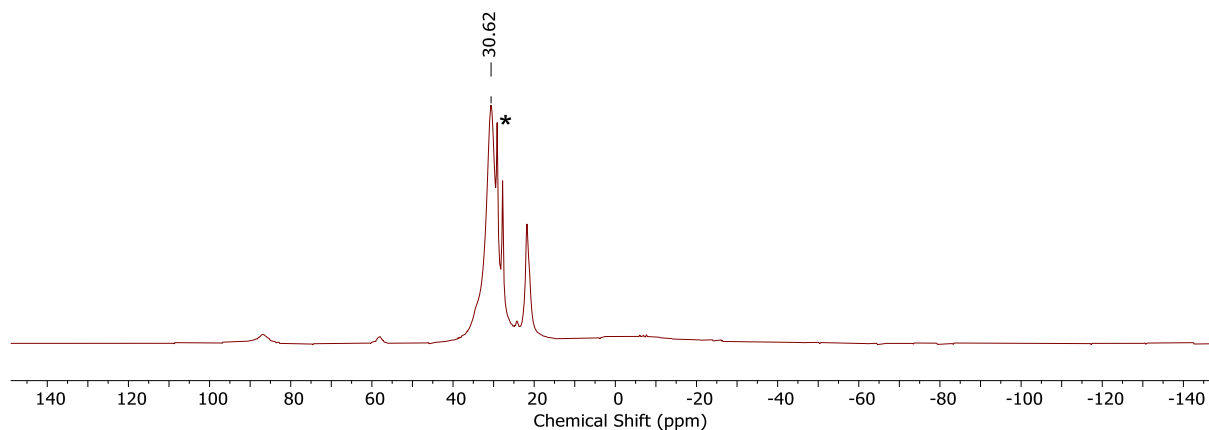

**Figure S141.**  $^{11}\text{B}$  NMR spectrum ( $\text{C}_6\text{D}_6$ ) of crude **37b**. \* = HB(pin).

#### 6.5.8. **38b** – (E)-4,4,5,5-tetramethyl-2-(3-methylstyryl)-1,3,2-dioxaborolane

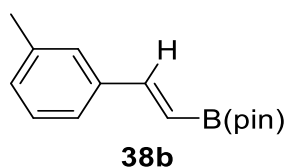

$^1\text{H}$  NMR (400 MHz, 298 K,  $\text{C}_6\text{D}_6$ ):  $\delta$  = 7.69 (d,  $^3J_{\text{HH}}$  = 18.3 Hz, 1H, CH), 6.69 – 7.22 (m, 4H, Ar), 6.40 (d,  $^3J_{\text{HH}}$  = 18.3 Hz, 1H, CH), 1.93 (s, 3H,  $\text{CH}_3$ ), 1.05 (s, 12H, Bpin) ppm.

$^{11}\text{B}$  NMR (128 MHz, 298 K,  $\text{C}_6\text{D}_6$ ):  $\delta$  = 30.6 (s) ppm.

**Mass spectrometry (APCI):**  $\text{C}_{15}\text{H}_{21}\text{BO}_2 + \text{H}$  ( $[\text{M} + \text{H}]^+$ ); Calcd. = 245.1707, Found = 245.1712.

Conversion: 86%

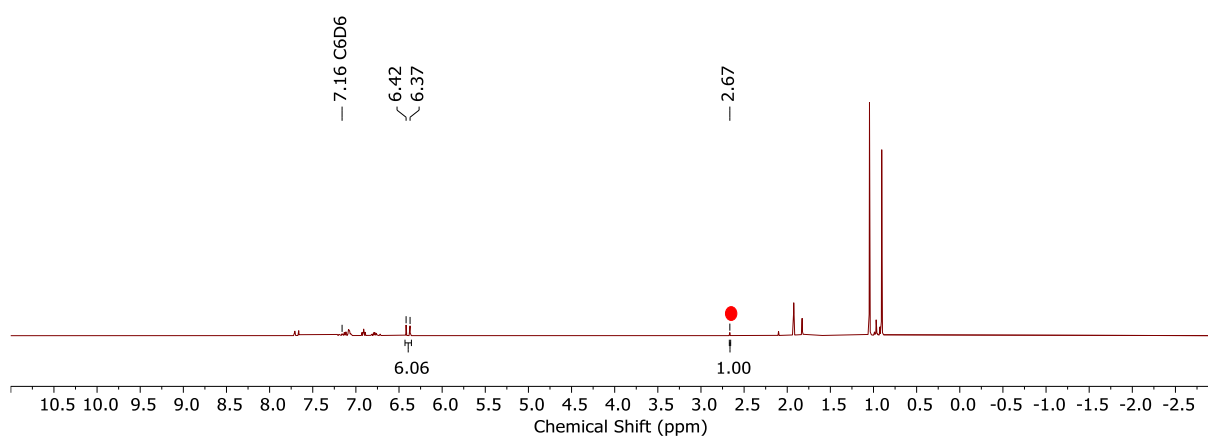

Figure S142.  $^1\text{H}$  NMR spectrum ( $\text{C}_6\text{D}_6$ ) of crude **38b**. ● = unreacted start material used to determine conversion.

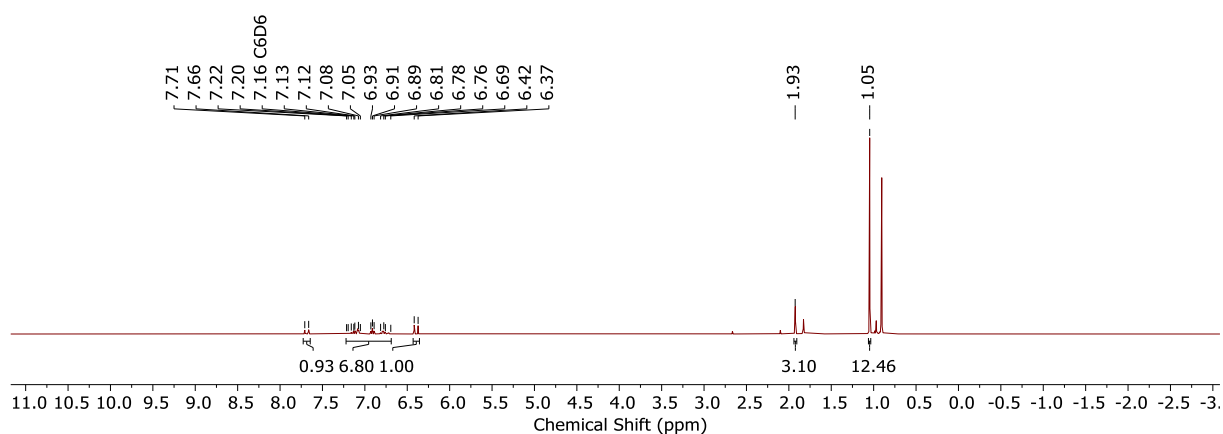

Figure S143.  $^1\text{H}$  NMR spectrum ( $\text{C}_6\text{D}_6$ ) of crude **38b**.

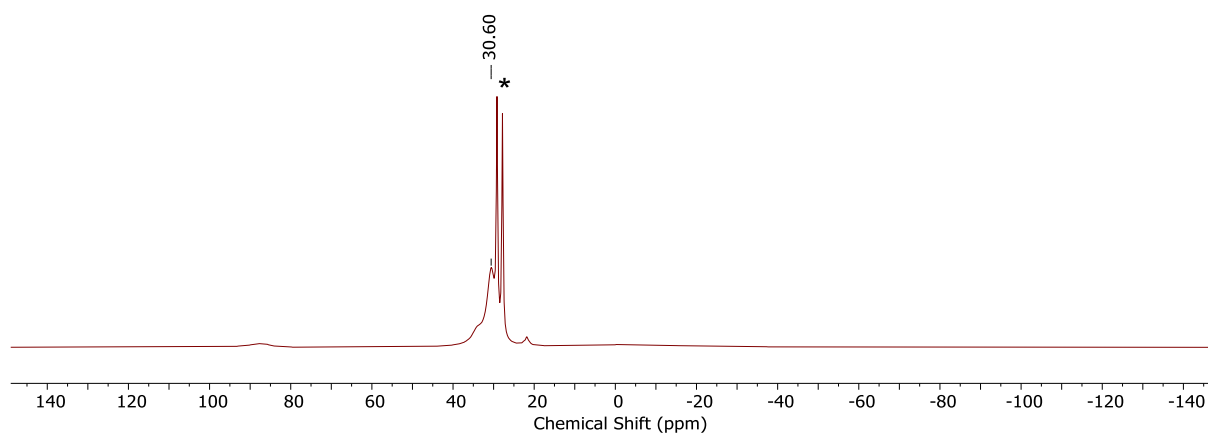

Figure S144.  $^{11}\text{B}$  NMR spectrum ( $\text{C}_6\text{D}_6$ ) of crude **38b**. \* = HB(pin).

## 6.6. Nitriles

We validated our analysis of hydroborated nitriles by comparison to various literature sources and found all data to be in agreement with those previously reported.<sup>17-19</sup>

### 6.6.1. **9b** – N-benzyl-4,4,5,5-tetramethyl-N-(4,4,5,5-tetramethyl-1,3,2-dioxaborolan-2-yl)-1,3,2-dioxaborolan-2-amine

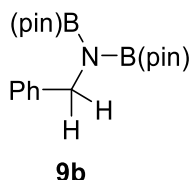

**<sup>1</sup>H NMR (400 MHz, 298 K, C<sub>6</sub>D<sub>6</sub>):**  $\delta$  = 7.00 – 7.60 (m, 5H, Ar), 4.61 (s, 2H, CH<sub>2</sub>), 1.03 (s, 24H, Bpin) ppm.

**<sup>11</sup>B NMR (128 MHz, 298 K, C<sub>6</sub>D<sub>6</sub>):**  $\delta$  = 26.5 (s) ppm.

**Mass spectrometry (APCI):** C<sub>19</sub>H<sub>31</sub>B<sub>2</sub>NO<sub>4</sub>+H ([M+H]<sup>+</sup>); Calcd. = 360.2512, Found = 360.2511

**Conversion:** 84%

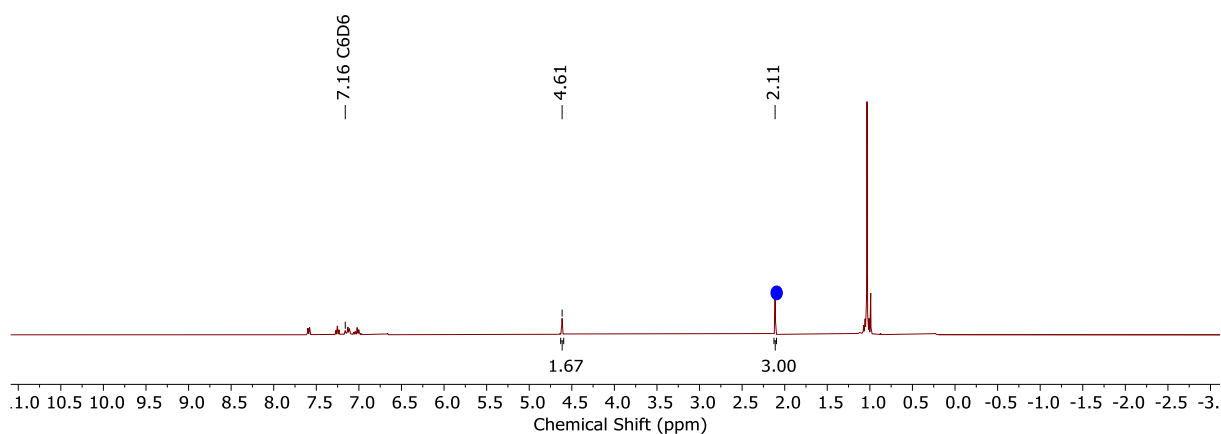

**Figure S145.** <sup>1</sup>H NMR spectrum (C<sub>6</sub>D<sub>6</sub>) of crude **9b**. ● = toluene internal standard resonance.



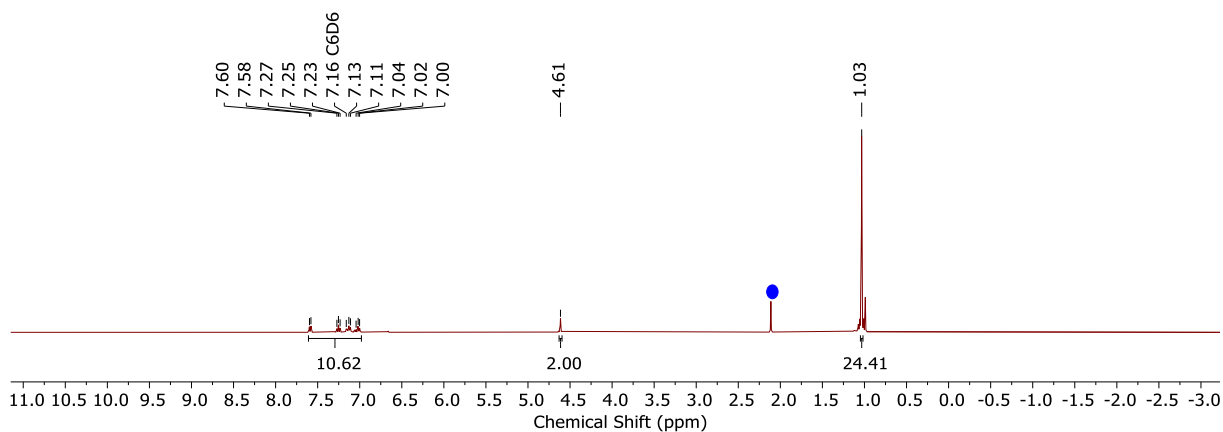

**Figure S146.**  $^1\text{H}$  NMR spectrum ( $\text{C}_6\text{D}_6$ ) of crude **9b**. ● = toluene internal standard resonance.

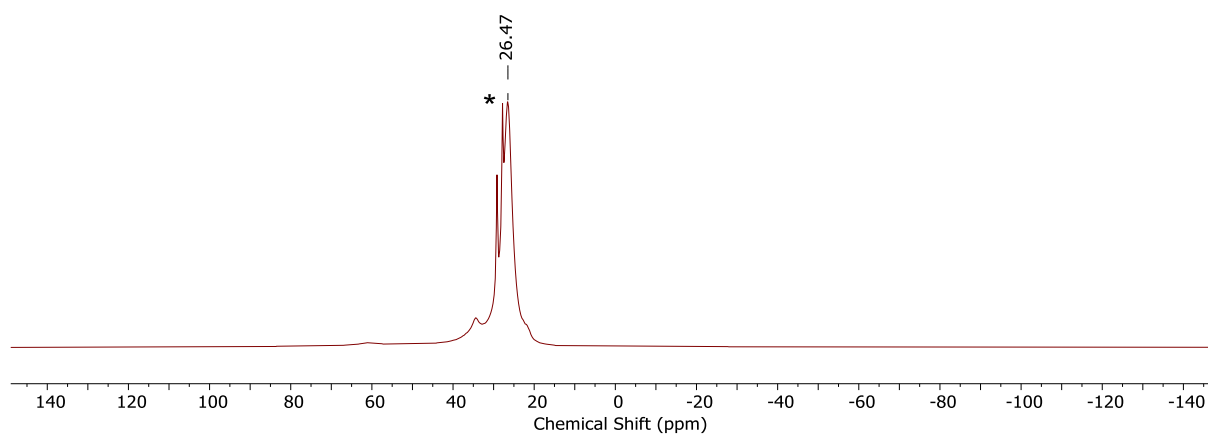

**Figure S147.**  $^{11}\text{B}$  NMR spectrum ( $\text{C}_6\text{D}_6$ ) of crude **9b**. \* =  $\text{HB}(\text{pin})$ .

6.6.2. **39b** – N-(4-bromobenzyl)-4,4,5,5-tetramethyl-N-(4,4,5,5-tetramethyl-1,3,2-dioxaborolan-2-yl)-1,3,2-dioxaborolan-2-amine

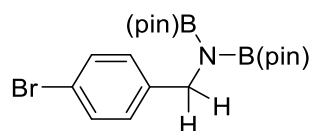

**39b**

$^1\text{H}$  NMR (400 MHz, 298 K,  $\text{C}_6\text{D}_6$ ):  $\delta$  = 6.96 – 7.35 (m, 4H, Ar), 4.42 (s, 2H,  $\text{NCH}_2$ ), 1.01 (s, 24H, Bpin) ppm.

$^{11}\text{B}$  NMR (128 MHz, 298 K,  $\text{C}_6\text{D}_6$ ):  $\delta$  = 26.4 (s) ppm.

Mass spectrometry (APCI):  $\text{C}_{19}\text{H}_{30}\text{B}_2\text{BrNO}_4 + \text{H}$  ( $[\text{M} + \text{H}]^+$ ); Calcd. = 438.1617, Found = 438.1617.

Conversion: 68%

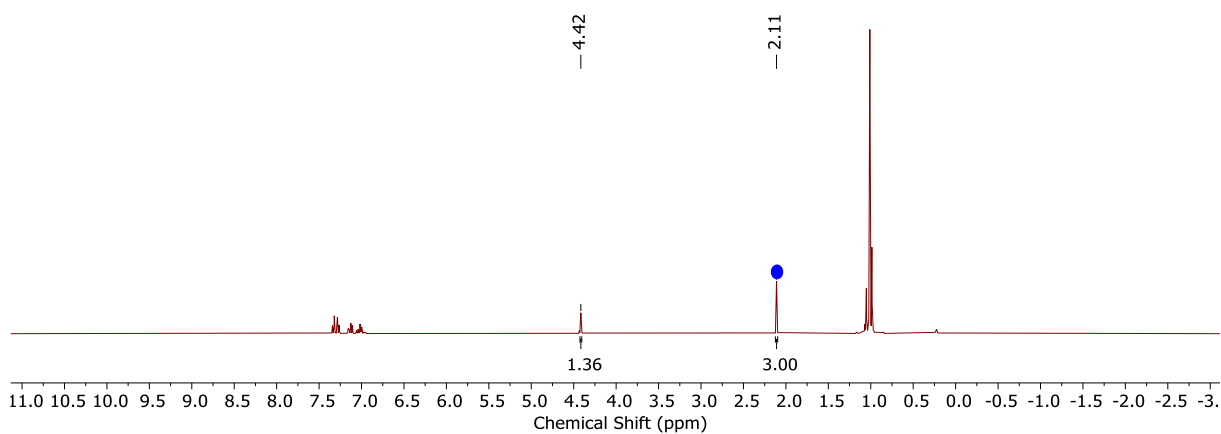

**Figure S148.**  $^1\text{H}$  NMR spectrum ( $\text{C}_6\text{D}_6$ ) of crude **39b**. ● = toluene internal standard resonance.

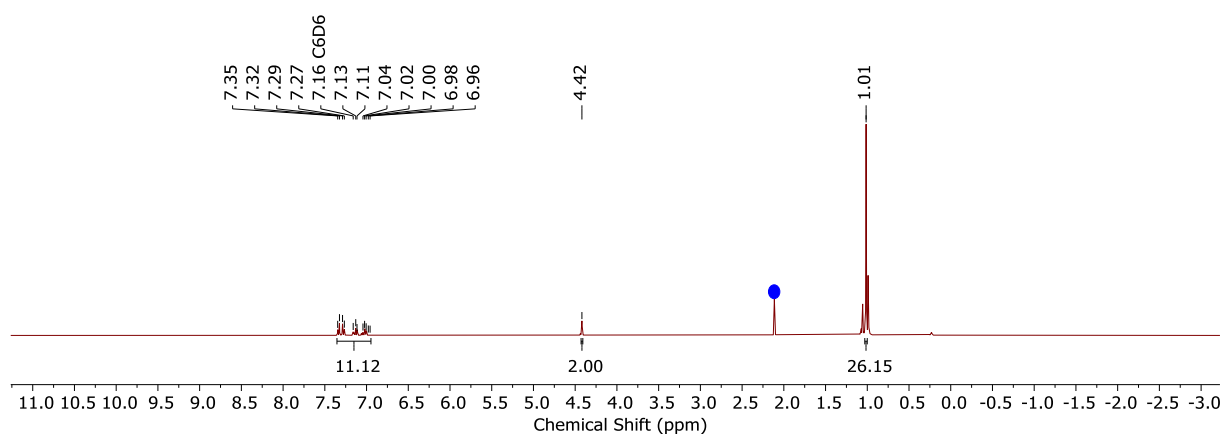

**Figure S149.**  $^1\text{H}$  NMR spectrum ( $\text{C}_6\text{D}_6$ ) of crude **39b**. ● = toluene internal standard resonance.

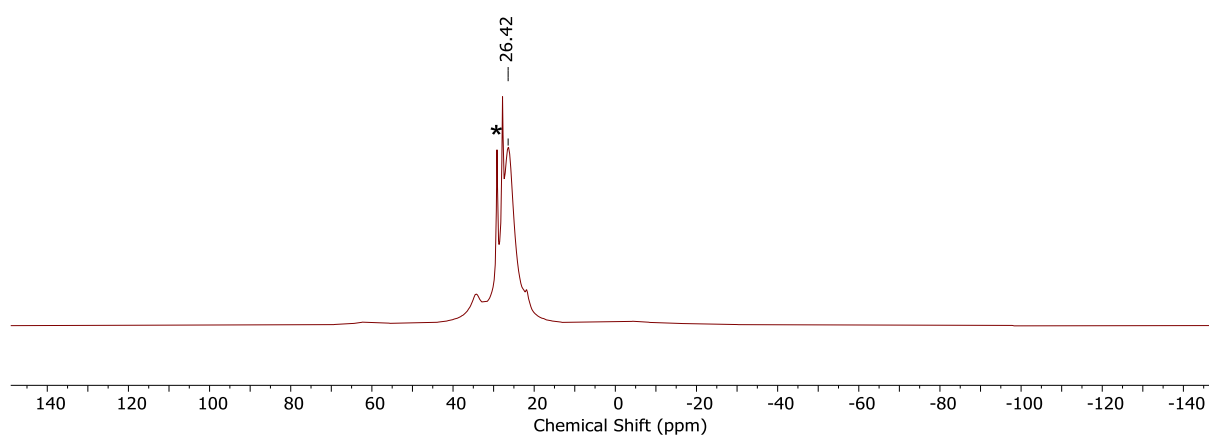

**Figure S150.**  $^{11}\text{B}$  NMR spectrum ( $\text{C}_6\text{D}_6$ ) of crude **39b**. \* = HB(pin).

6.6.3. **40b** – N-(4-methoxybenzyl)-4,4,5,5-tetramethyl-N-(4,4,5,5-tetramethyl-1,3,2-dioxaborolan-2-yl)-1,3,2-dioxaborolan-2-amine

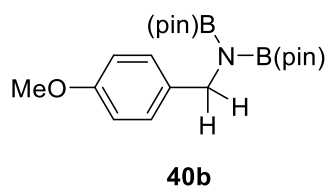

$^1\text{H}$  NMR (400 MHz, 298 K,  $\text{C}_6\text{D}_6$ ):  $\delta$  = 6.86 – 7.58 (m, 4H, Ar), 4.58 (s, 2H,  $\text{NCH}_2$ ), 3.35 (s, 3H,  $\text{CH}_3$ ), 1.05 (s, 24H, Bpin) ppm.

$^{11}\text{B}$  NMR (128 MHz, 298 K,  $\text{C}_6\text{D}_6$ ):  $\delta$  = 26.6 (s) ppm.

Mass spectrometry (APCI):  $\text{C}_{20}\text{H}_{33}\text{B}_2\text{NO}_5 + \text{H}$  ( $[\text{M} + \text{H}]^+$ ); Calcd. = 390.2618, Found = 390.2616.

Conversion: 66%

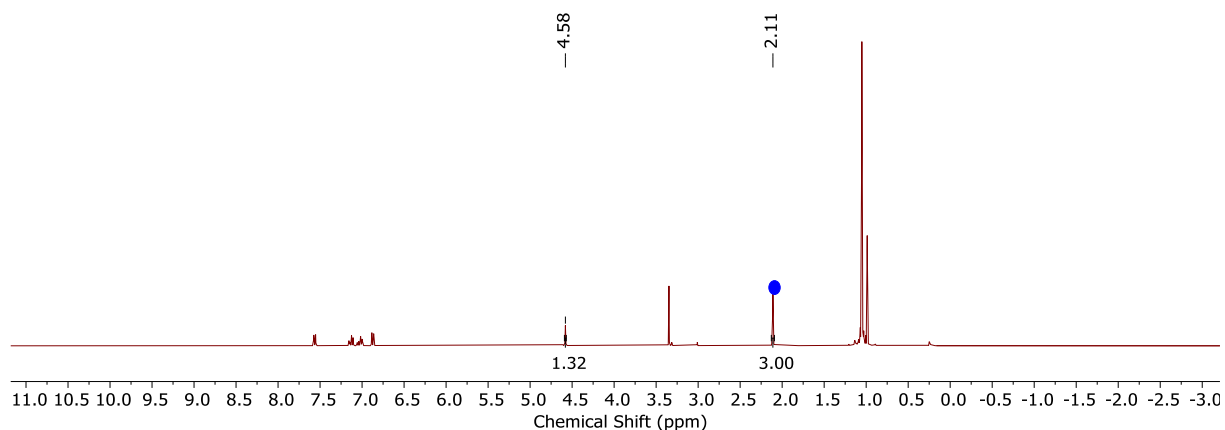

**Figure S151.**  $^1\text{H}$  NMR spectrum ( $\text{C}_6\text{D}_6$ ) of crude **40b**. ● = toluene internal standard resonance.

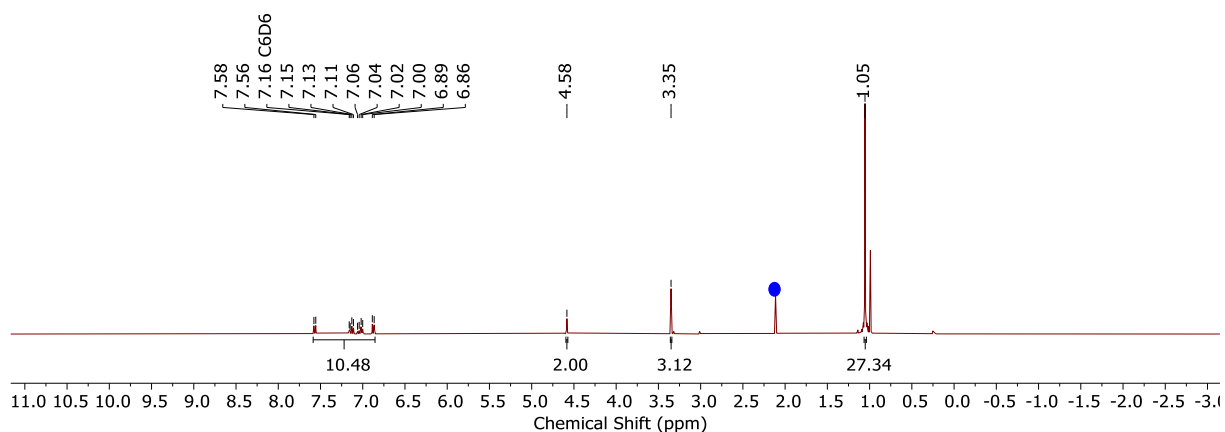

**Figure S152.**  $^1\text{H}$  NMR spectrum ( $\text{C}_6\text{D}_6$ ) of crude **40b**. • = toluene internal standard resonance.

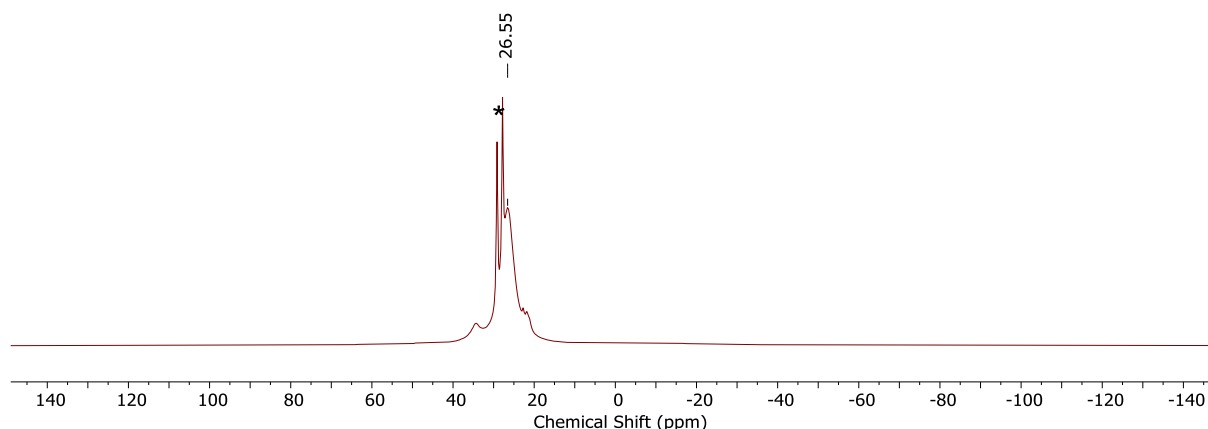

**Figure S153.**  $^{11}\text{B}$  NMR spectrum ( $\text{C}_6\text{D}_6$ ) of crude **40b**. \* = HB(pin).

6.6.4. **41b** – N-(cyclohexylmethyl)-4,4,5,5-tetramethyl-N-(4,4,5,5-tetramethyl-1,3,2-dioxaborolan-2-yl)-1,3,2-dioxaborolan-2-amine

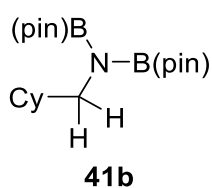

$^1\text{H}$  NMR (400 MHz, 298 K,  $\text{C}_6\text{D}_6$ ):  $\delta = 3.34$  (d,  $^3J_{\text{HH}} = 7.16$  Hz, 2H,  $\text{NCH}_2$ ), 1.89 – 1.95 (m, 2H, Cy), 1.70 – 1.80 (m, 5H, Cy), 1.14 – 1.33 (m, 4H, Cy), 1.08 (s, 24H, Bpin) ppm.

$^{11}\text{B}$  NMR (128 MHz, 298 K,  $\text{C}_6\text{D}_6$ ):  $\delta = 26.3$  (s) ppm.

**Mass spectrometry (APCI):**  $\text{C}_{19}\text{H}_{37}\text{B}_2\text{NO}_4 + \text{H}$  ( $[\text{M} + \text{H}]^+$ ); Calcd. = 366.2981, Found = 366.2987.

**Conversion:** 74%

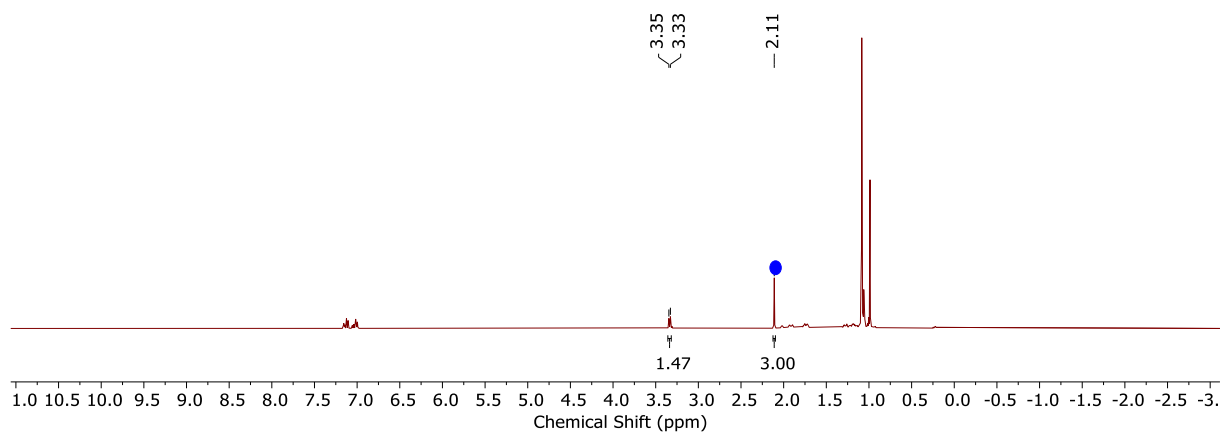

**Figure S154.**  $^1\text{H}$  NMR spectrum ( $\text{C}_6\text{D}_6$ ) of crude **41b**. • = toluene internal standard resonance.

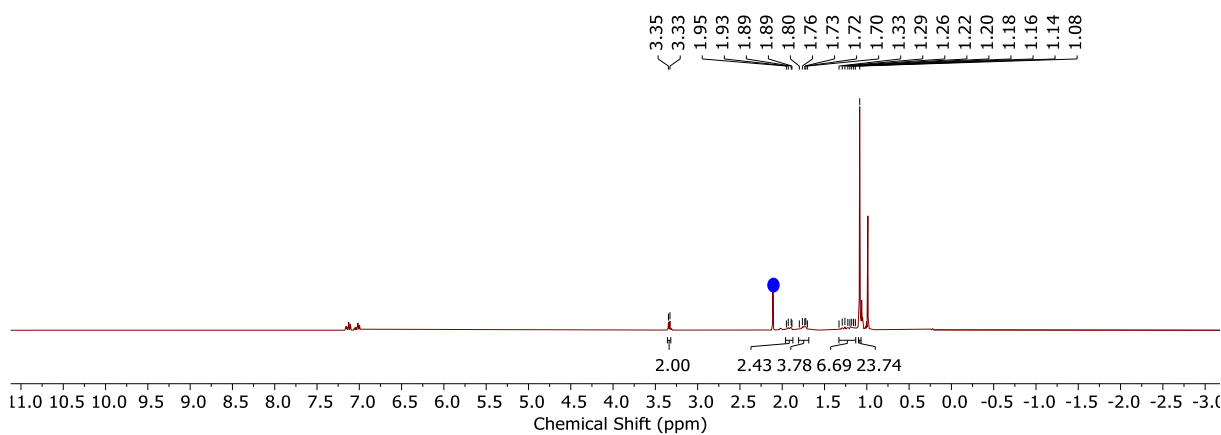

**Figure S155.**  $^1\text{H}$  NMR spectrum ( $\text{C}_6\text{D}_6$ ) of crude **41b**. • = toluene internal standard resonance.

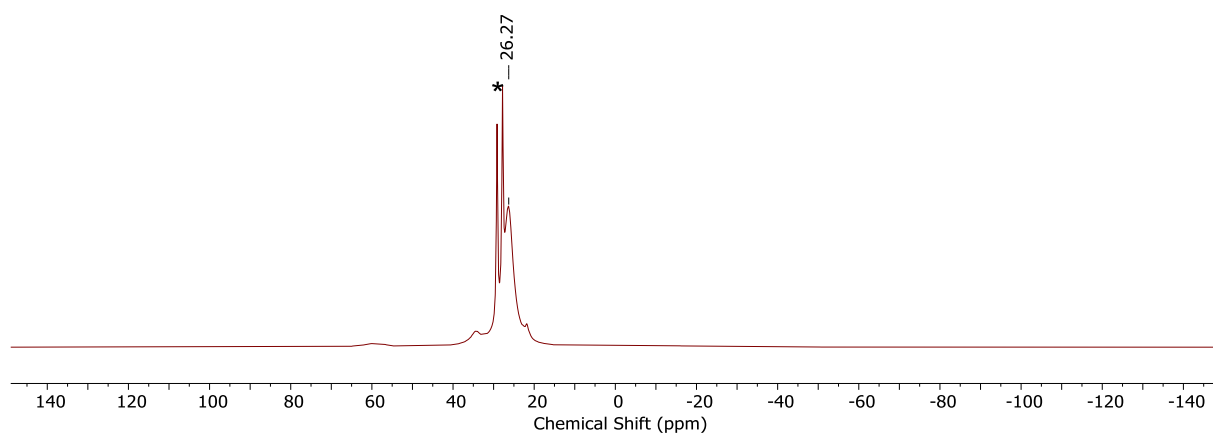

**Figure S156.**  $^{11}\text{B}$  NMR spectrum ( $\text{C}_6\text{D}_6$ ) of crude **41b**. \* = HB(pin).

6.6.5. **42b** – N-butyl-4,4,5,5-tetramethyl-N-(4,4,5,5-tetramethyl-1,3,2-dioxaborolan-2-yl)-1,3,2-dioxaborolan-2-amine

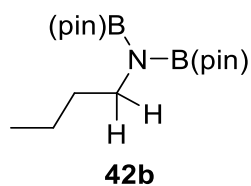

$^1\text{H}$  NMR (400 MHz, 298 K,  $\text{C}_6\text{D}_6$ ):  $\delta = 3.47$  (t,  $^3J_{\text{HH}} = 7.0$  Hz, 2H,  $\text{NCH}_2$ ), 1.75 (m, 2H,  $\text{CH}_2$ ), 1.43 (m, 2H,  $\text{CH}_2$ ), 1.08 (s, 24H,  $\text{Bpin}$ ), 0.96 (t,  $^3J_{\text{HH}} = 7.4$  Hz, 3H,  $\text{CH}_3$ ) ppm.

$^{11}\text{B}$  NMR (128 MHz, 298 K,  $\text{C}_6\text{D}_6$ ):  $\delta = 26.33$  (s) ppm.

Mass spectrometry (APCI):  $\text{C}_{16}\text{H}_{33}\text{B}_2\text{NO}_4 + \text{H}$  ( $[\text{M} + \text{H}]^+$ ); Calcd. 326.2668, Found = 326.2658.

Conversion: 95%

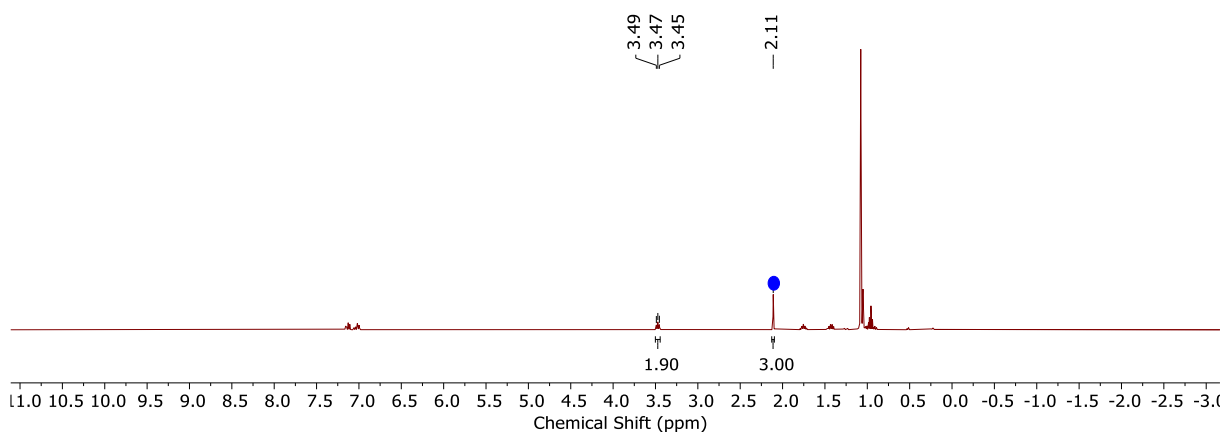

**Figure S157.**  $^1\text{H}$  NMR spectrum ( $\text{C}_6\text{D}_6$ ) of crude **42b**. ● = toluene internal standard resonance.

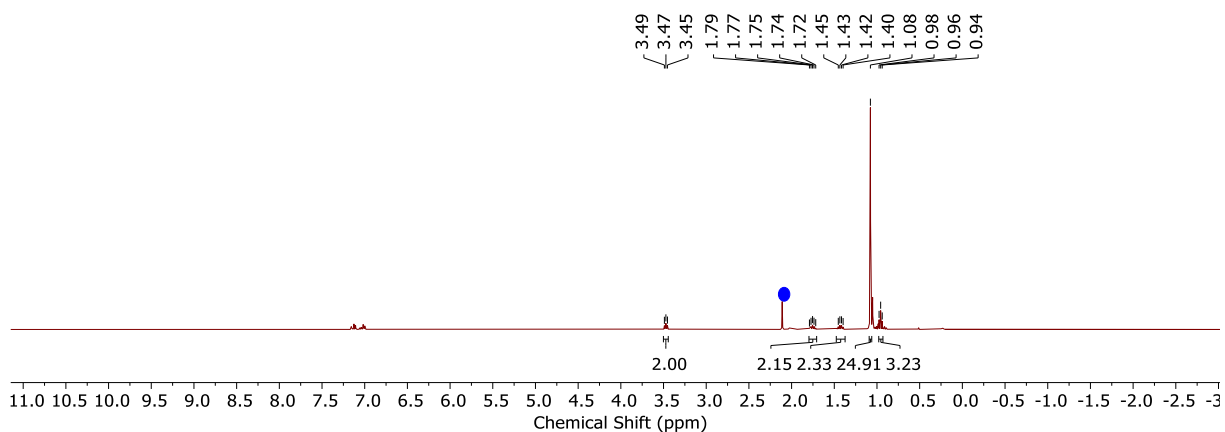

**Figure S158.**  $^1\text{H}$  NMR spectrum ( $\text{C}_6\text{D}_6$ ) of crude **42b**. • = toluene internal standard resonance.

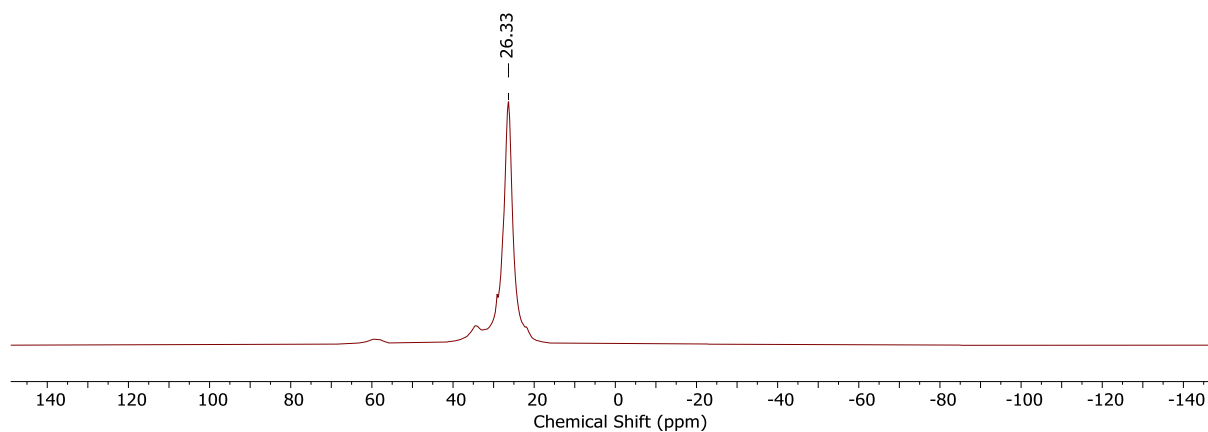

**Figure S159.**  $^{11}\text{B}$  NMR spectrum ( $\text{C}_6\text{D}_6$ ) of crude **42b**.

6.6.6. **43b** - 4,4,5,5-tetramethyl-N-(pyridin-4-ylmethyl)-N-(4,4,5,5-tetramethyl-1,3,2-dioxaborolan-2-yl)-1,3,2-dioxaborolan-2-amine

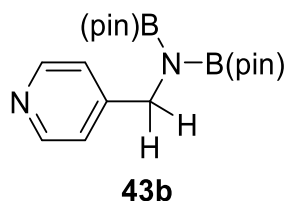

$^1\text{H}$  NMR (400 MHz, 298 K,  $\text{C}_6\text{D}_6$ ):  $\delta$  = 8.61 (d,  $^3J_{\text{HH}}$  = 5.7 Hz, 1H, *Py*), 8.13 (d,  $^3J_{\text{HH}}$  = 6.0 Hz, 1H, *Py*), 7.15 (m, 1H, *Py*), 6.42 (d,  $^3J_{\text{HH}}$  = 6.0 Hz, 1H, *Py*), 4.40 (s, 2H,  $\text{NCH}_2$ ), 1.00 (s, 24H, *Bpin*) ppm.

$^{11}\text{B}$  NMR (128 MHz, 298 K,  $\text{C}_6\text{D}_6$ ):  $\delta$  = 24.0 (s) ppm.

**Mass spectrometry (ESI):**  $\text{C}_{18}\text{H}_{30}\text{B}_2\text{N}_2\text{O}_4+\text{Na}$  ( $[\text{M}+\text{Na}]^+$ ); Calcd. = 383.23, Found = 383.33

**Conversion:** 16%

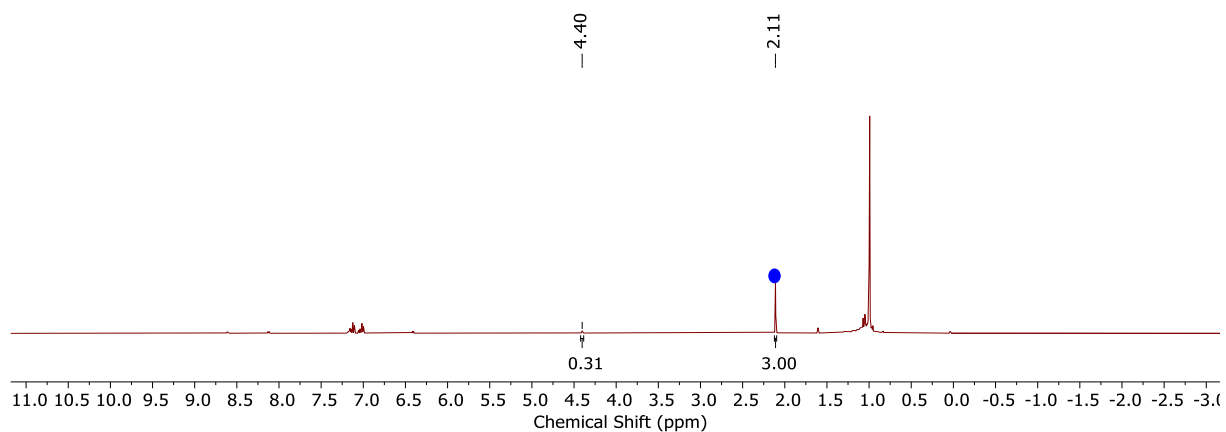

**Figure S160.**  $^1\text{H}$  NMR spectrum ( $\text{C}_6\text{D}_6$ ) of crude **43b**. ● = toluene internal standard resonance.

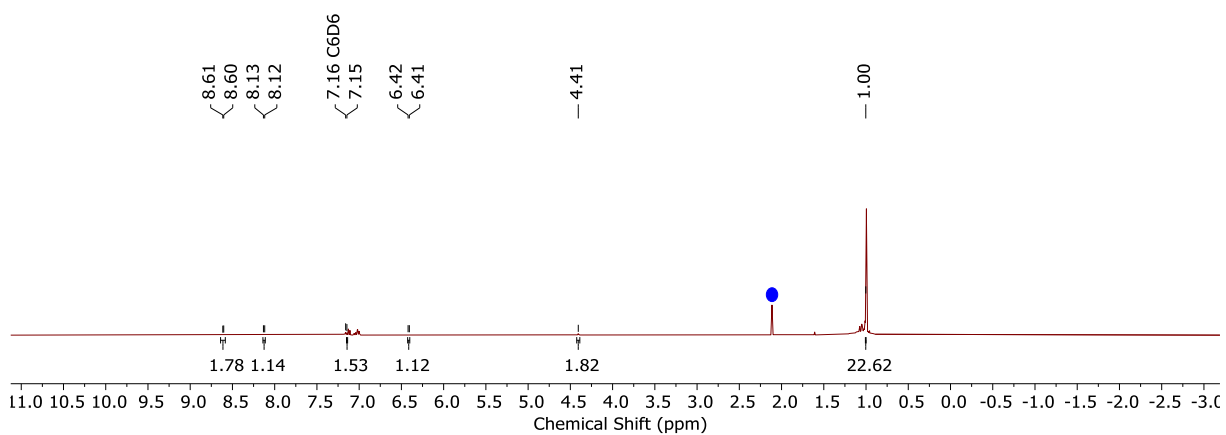

**Figure S161.**  $^1\text{H}$  NMR spectrum ( $\text{C}_6\text{D}_6$ ) of crude **43b**. ● = toluene internal standard resonance.

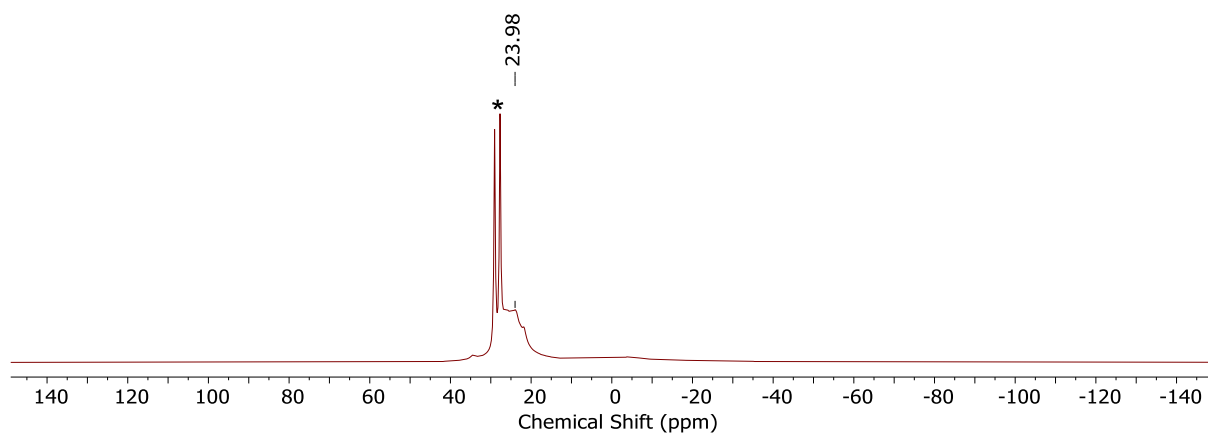

**Figure S162.**  $^{11}\text{B}$  NMR spectrum ( $\text{C}_6\text{D}_6$ ) of crude **43b**. \* = HB(pin).



6.6.7. **44b** – 4,4,5,5-tetramethyl-N-(pyridin-2-ylmethyl)-N-(4,4,5,5-tetramethyl-1,3,2-dioxaborolan-2-yl)-1,3,2-dioxaborolan-2-amine

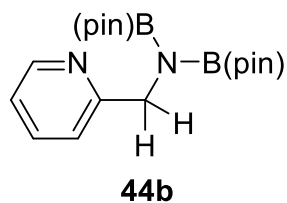

**$^1\text{H}$  NMR (400 MHz, 298 K,  $\text{C}_6\text{D}_6$ ):**  $\delta = 4.90$  (s, 2H,  $\text{NCH}_2$ ), 1.03 (s, 24H, *Bpin*) ppm; pyridine *CH* could not be identified due to low conversion.

**$^{11}\text{B}$  NMR (128 MHz, 298 K,  $\text{C}_6\text{D}_6$ ):**  $\delta = 25.7$  ppm.

**Mass spectrometry (ESI):**  $\text{C}_{18}\text{H}_{30}\text{B}_2\text{N}_2\text{O}_4 + \text{H}$  ( $[\text{M} + \text{H}]^+$ ); Calcd. = 361.25, Found = 361.17

**Conversion:** 10%

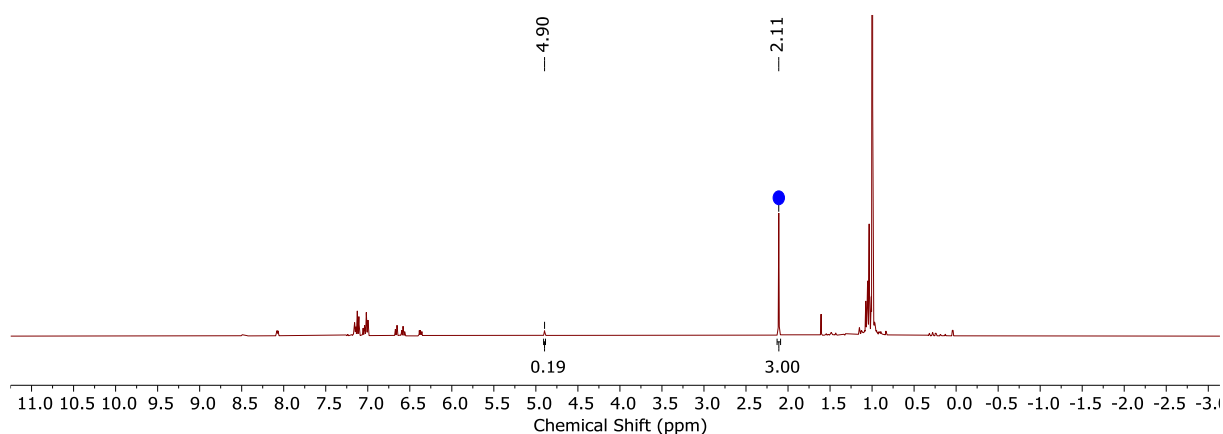

**Figure S163.**  $^1\text{H}$  NMR spectrum ( $\text{C}_6\text{D}_6$ ) of crude **44b**. ● = toluene internal standard resonance.

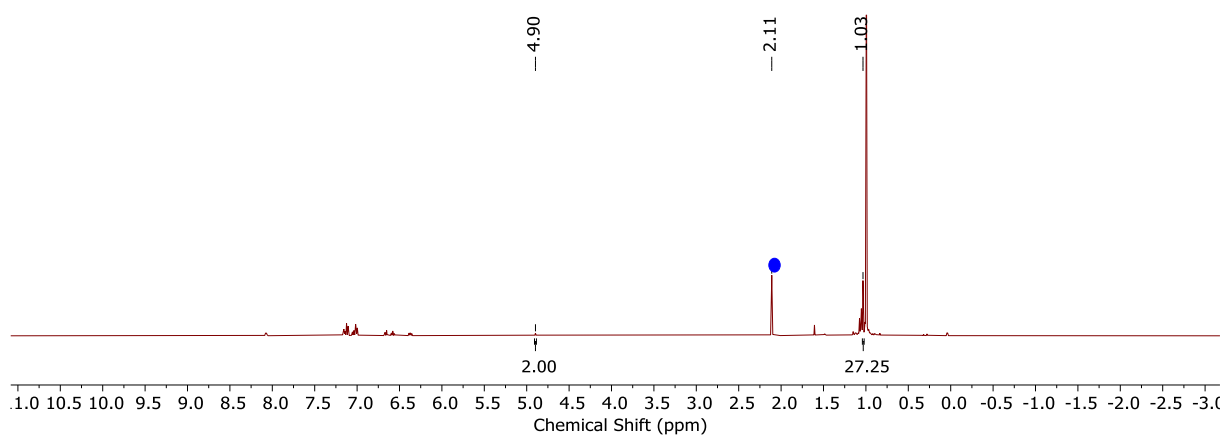

**Figure S164.**  $^1\text{H}$  NMR spectrum ( $\text{C}_6\text{D}_6$ ) of crude **44b**. • = toluene internal standard resonance.

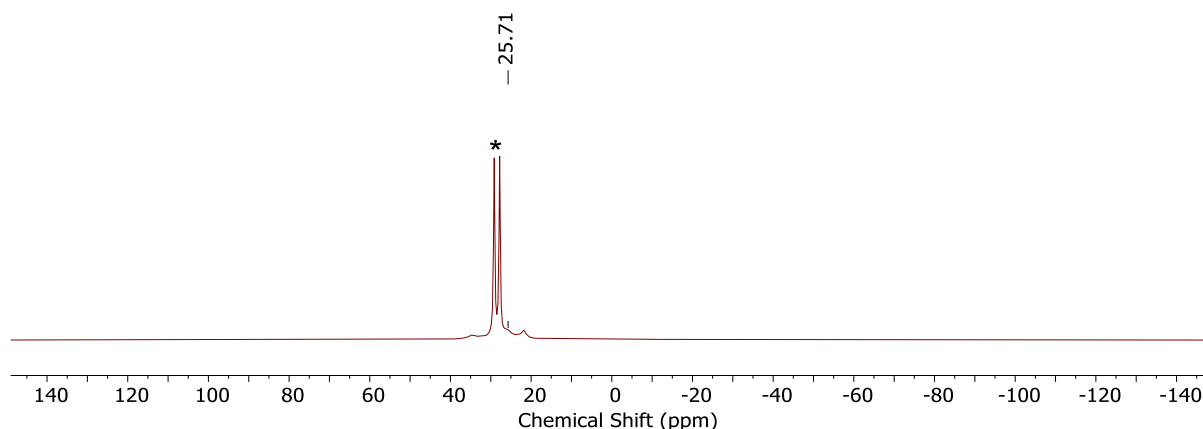

**Figure S165.**  $^{11}\text{B}$  NMR spectrum ( $\text{C}_6\text{D}_6$ ) of crude **44b**. \* = HB(pin).

## 7. Studies into Catalyst-Product Interactions

We observed consistent low conversions in the hydroboration of isocyanates (average = 42 %), with a second  $^{11}\text{B}$  NMR signal with a  $\delta$  of  $\sim 21$  ppm can also be observed. A signal in this region has also been reported by other groups who have investigated isocyanate hydroboration, and was left unidentified.<sup>14</sup>

Here we probe the identity of this signal.

### Test 1: (pin)B–O–B(pin)

(pin)B–O–B(pin) is a possible by-product from isocyanate deoxygenation. However, we do not believe that the signal at  $\sim 21$  ppm in the  $^{11}\text{B}$  NMR spectrum is (pin)B–O–B(pin), because no (pin)B–O–B(pin) could be detected by MS of these reaction mixtures. Further, no evidence for deoxygenation could be observed by  $^1\text{H}$  NMR spectroscopy of these reactions.

## Test 2: Insertion of Isocyanate into the P–Si Bonds of the Catalyst and Reaction with HB(pin)

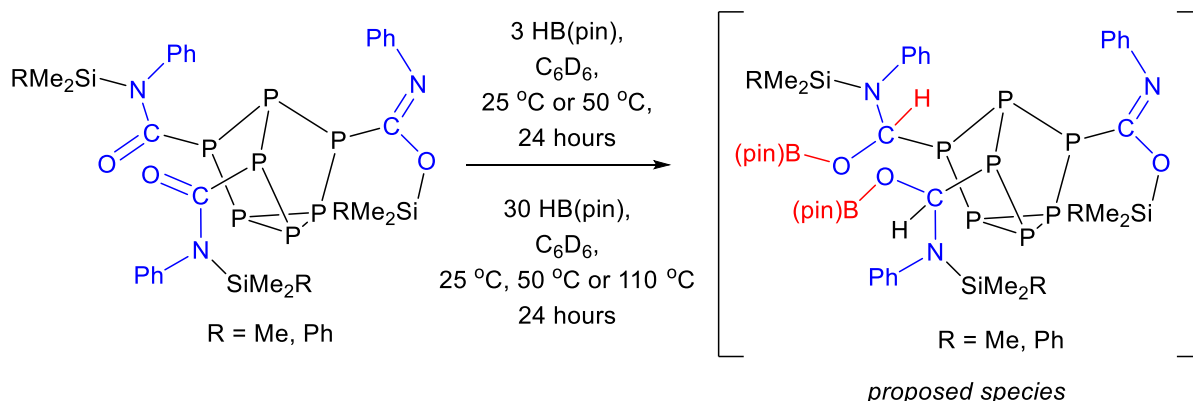

**Scheme S8.** Postulated reaction of HB(pin) with inserted isocyanates.

We have previously demonstrated insertion into the P–Si bonds of silyl functionalized  $\text{P}_7$  clusters is possible.<sup>20</sup> Previously prepared, N,N,O-bound  $(\text{PhNCO-SiMe}_3)_3(\text{P}_7)$  (15 mg, 0.02 mmol) and  $(\text{PhNCO-SiMe}_2\text{Ph})_3(\text{P}_7)$  (15 mg, 0.015 mmol) were dissolved in  $\text{C}_6\text{D}_6$  (0.5 mL), transferred to a J Young NMR tube and three equivalents of HB(pin) was added. The reaction was sequentially monitored after 24 hours at 25 °C and 50 °C by  $^1\text{H}$ ,  $^{11}\text{B}$ , and  $^{31}\text{P}$  NMR spectroscopy where no changes were observed. To mimic the catalytic nature of our hydroboration reactions we added an additional 27 equivalents of HB(pin) to the reaction mixture and monitored the reaction in the same manner, and again no reaction was observed by NMR spectroscopy. Further, stoichiometric studies between phenyl isocyanate and catalyst **2**, showed no change in the  $^{31}\text{P}$  or  $^{29}\text{Si}$  NMR spectra, consistent with no isocyanate insertion.

## Test 3: Interaction of catalyst **2** with hydroborated isocyanate product.

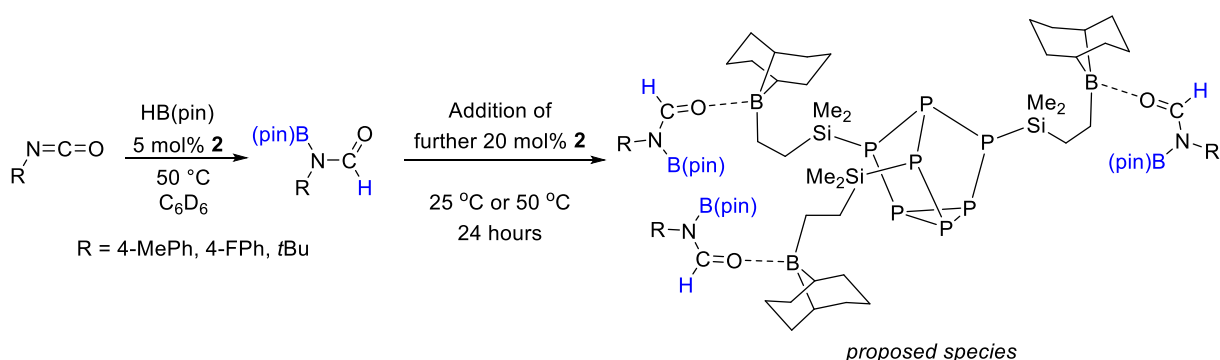

**Scheme S9.** Proposed interaction of hydroborated isocyanate with catalyst **2**.

Because the integration of the signal at 21 ppm in the  $^{11}\text{B}$  NMR spectrum was approximately 15% or under, and our loading of catalyst Lewis acidic sites is 15% we postulated is this signal is the result of catalyst-product coordination. Under the reaction conditions discussed in section 4, once hydroboration of 4-MePhN(B(pin))CHO (**15b**), 4-FPhN(B(pin))CHO (**17b**) and *t*BuN(B(pin))CHO (**20b**) substrates was completed, an additional 16.8 mg (20 mol%) of catalyst **2** was added to each of the reaction mixtures. The reaction was then monitored at 25 °C by  $^1\text{H}$ ,  $^{11}\text{B}$ , and  $^{31}\text{P}$  NMR spectroscopy. In the  $^1\text{H}$  NMR spectra of all case, we see a decrease in the  $\text{CH}_3$  signal of the B(pin) moiety (12H) of **15b**, **17b**, and **20b** (products) to the proposed interaction. Further, we see the relative intensities of the product signal in  $^{11}\text{B}$  NMR spectrum decrease, while the resonance at 21 ppm increase. From these results, we speculate the resonance at 21 ppm is the adduct between catalyst **2** and the isocyanate hydroborated product, as shown in Scheme S9.

Similarly, there are small unidentified  $^{11}\text{B}$  NMR resonances from the hydroboration of alkynes. Similar testing to isocyanates indicated no interaction with the catalyst and alkyne hydroborate products. Further, these unidentified  $^{11}\text{B}$  NMR resonance are not consistent with previously reported branched alkene or *cis*-alkene products.<sup>21, 22</sup>

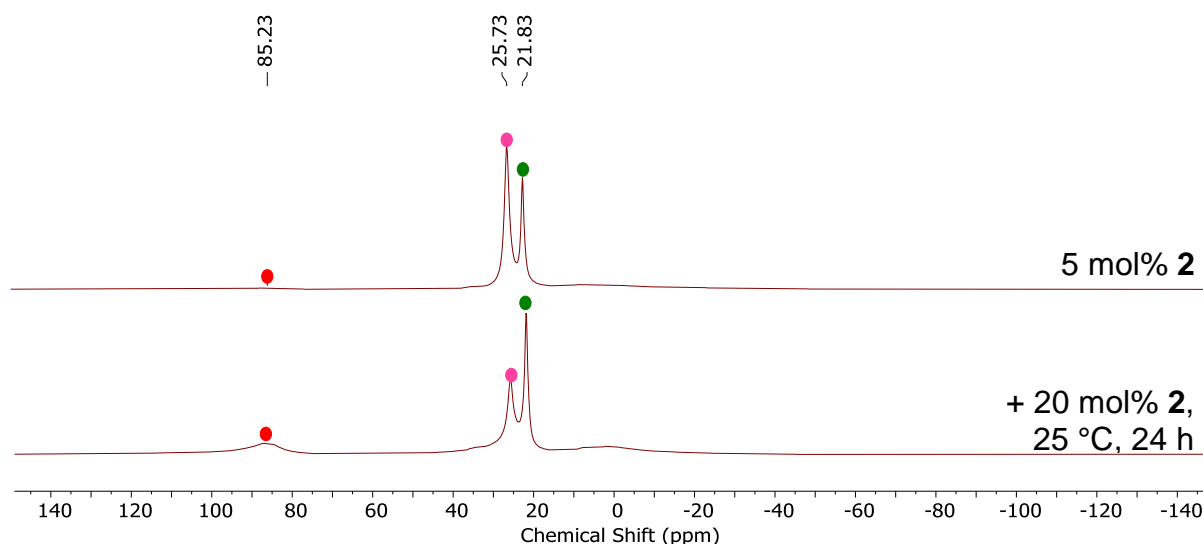

**Figure S166.** Stacked  $^{11}\text{B}$  NMR spectra in  $\text{C}_6\text{D}_6$  of crude **15b** and the changes with an increase in catalyst loading. ● = “free” hydroborated product (**15b**), ● = proposed adduct of **15b** with catalyst **2**, ● = catalyst **2**.

## 8. Studies into Catalyst-Substrate Interactions

Coordination of substrate to the Lewis acidic site was probed by  $^{11}\text{B}$  NMR spectroscopy. Compound **2** (30 mg, 0.036 mmol) in  $\text{C}_6\text{D}_6$  (0.5 mL) was reacted with three equivalents of substrate (0.108 mmol). The reaction was monitored by  $^1\text{H}$ ,  $^{11}\text{B}$ ,  $^{29}\text{Si}\{^1\text{H}\}$ , and  $^{31}\text{P}$  NMR spectroscopy at room temperature.

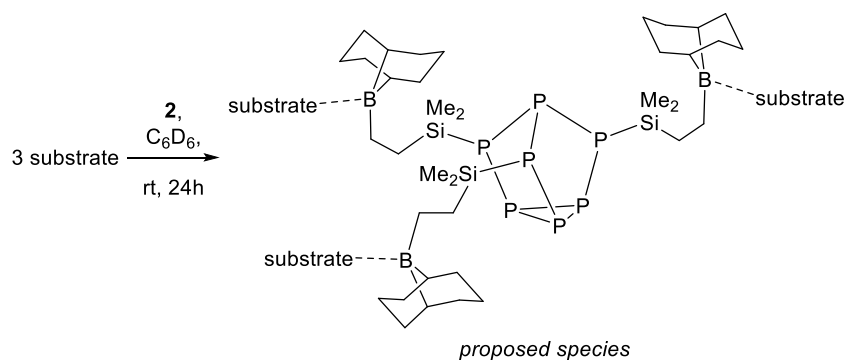

### Scheme S10. Proposed interaction of 3 equivalents of substrate with catalyst **2**.

We observed no interactions by NMR spectroscopy between catalyst **2** and substrates **5a** – **8a** or HB(pin). In the case of HB(pin), the NMR spectrum was also collected in  $d_8$ -toluene at  $-70\text{ }^\circ\text{C}$  after cooling the sample in the instrument for 1 hour and again no adduct formation or change could be detected by  $^1\text{H}$ ,  $^{31}\text{P}$  or  $^{11}\text{B}$  NMR spectroscopy. Substrates **4a** (diisopropylcarbodiimide) and **9a** (benzonitrile) do show a detectable interaction by  $^{11}\text{B}$  NMR spectroscopy with a small shift from 86.5 ppm (**2**) to 74.9 ppm (**2** + 3 eq **4a**) or 80.3 ppm (**2** + 3 eq **9a**).

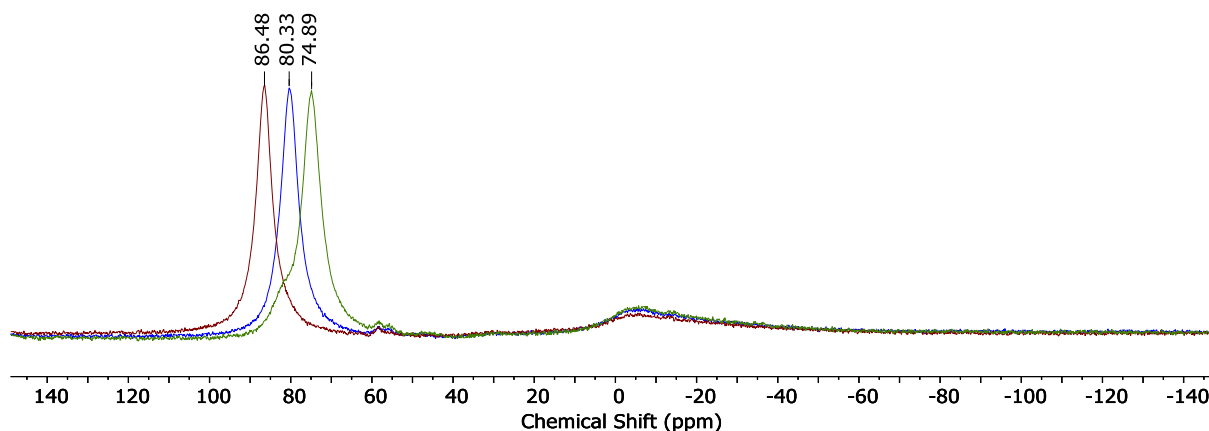

**Figure S167.** Overlaid  $^{11}\text{B}$  NMR spectra in  $\text{C}_6\text{D}_6$  of **2** (red), **2** + 3 PhCN (**9a**, blue) and **2** + 3  $i\text{PrNCNiPr}$  (**4a**, green).

## 9. Testing for Hidden Catalysis

Thomas and co-workers have previously reported the ‘hidden role’ that  $\text{BH}_3$  can play in hydroboration catalysis when  $\text{HB}(\text{pin})$  is used as the hydroborating agent in the presence of a Lewis acid catalyst.<sup>23</sup> First, the commercial pinacol borane was investigated by NMR spectroscopy for contaminants, none were found. Next, benzonitrile (**9a**) converted to **9b** using catalysts **2** 120h at 110 °C. These are the harshest conditions employed when investigating **2** as a hydroboration catalyst with  $\text{HB}(\text{pin})$ . The reaction mixture was investigated by NMR spectroscopy. Next, an excess of tetramethylethylenediamine (TMEDA) was added to the reaction mixture and investigated by NMR spectroscopy. To allow for direct comparisons of the NMR spectra, the  $\text{TMEDA}\cdot\text{BH}_3$  adduct was independently prepared by reaction of excess TMEDA with  $\text{BH}_3\cdot\text{SMe}_2$ . No evidence of  $\text{TMEDA}\cdot\text{BH}_3$  or any other borohydride was detected during the catalysis.

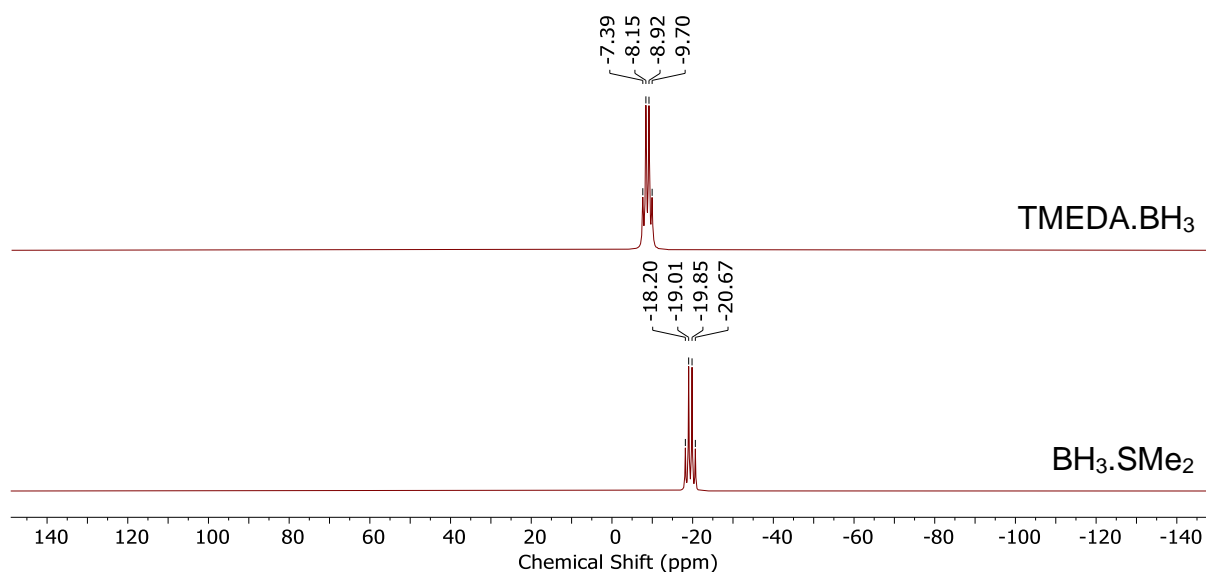

**Figure S168.**  $^{11}\text{B}$  NMR spectra in  $\text{C}_6\text{D}_6$  of  $\text{TMEDA}\cdot\text{BH}_3$  (top) and  $\text{BH}_3\cdot\text{SMe}_2$  (bottom).  $\text{TMEDA}\cdot\text{BH}_3$ :  $\delta$   $-8.53$  (q,  $^1J_{\text{BH}} = 95.8$  Hz);  $\text{BH}_3\cdot\text{SMe}_2$ :  $\delta$   $-19.43$  (q,  $^1J_{\text{BH}} = 105.9$  Hz).

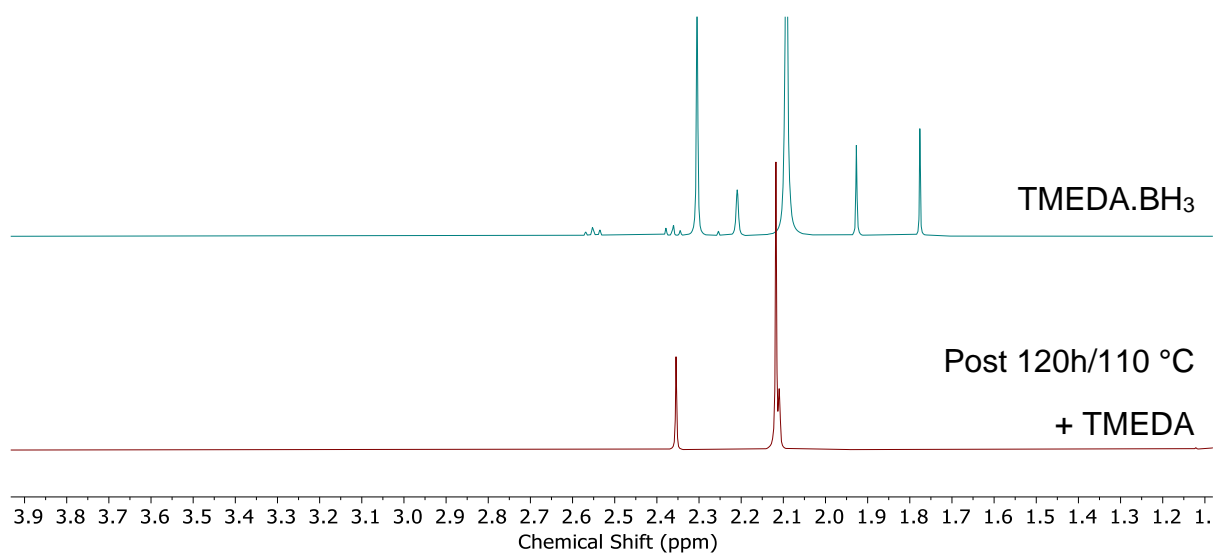

**Figure S169.**  $^1\text{H}$  NMR spectra in  $\text{C}_6\text{D}_6$  of **9a** catalyzed to **9b** by catalyst **2** (5 mol%) followed by TMEDA addition (red);  $^1\text{H}$  NMR spectra in  $\text{C}_6\text{D}_6$  of  $\text{TMEDA}\cdot\text{BH}_3$  (blue).

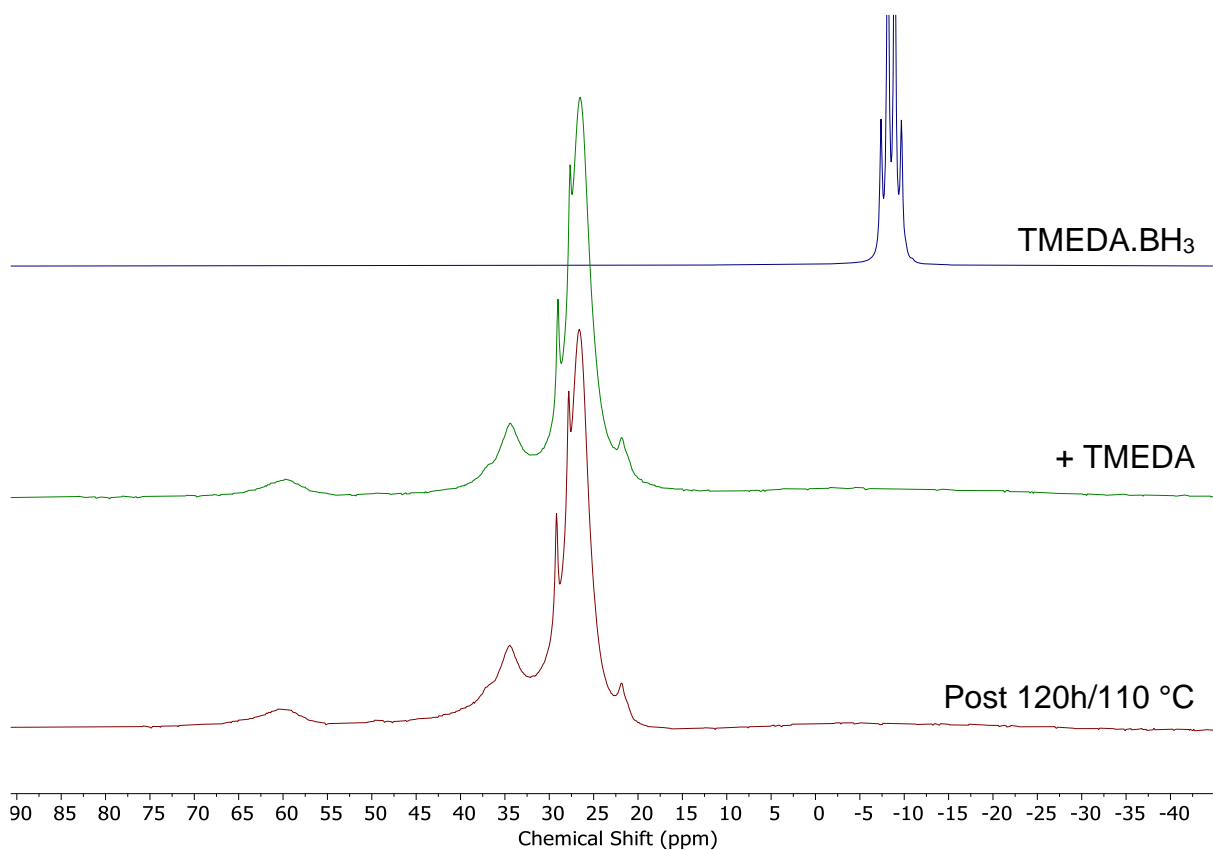

**Figure S170.**  $^{11}\text{B}$  NMR spectra in  $\text{C}_6\text{D}_6$  of **9a** catalyzed to **9b** by catalyst **2** (5 mol%) (red);  $^{11}\text{B}$  NMR spectra in  $\text{C}_6\text{D}_6$  of **9a** catalyzed to **9b** by catalyst **2** (5 mol%) and subsequent addition of TMEDA (green);  $^{11}\text{B}$  NMR spectra of  $\text{TMEDA}\cdot\text{BH}_3$  (blue).

## 10. Catalyst Recycling

We investigated the ability to recycle catalyst **2** with the hydroboration of diisopropylcarbodiimide (**4a**). Following the general procedure outlined in section 4, once hydroboration of **4a** was complete we reloaded the reaction mixture with more substrates and reused the catalyst. We repeated this for a total of 9 cycles, after which catalyst **2** could no longer be reliably detected by  $^{31}\text{P}\{^1\text{H}\}$  NMR spectroscopy. One equivalent of toluene was added in the first cycle and was used as the internal reference standard throughout.

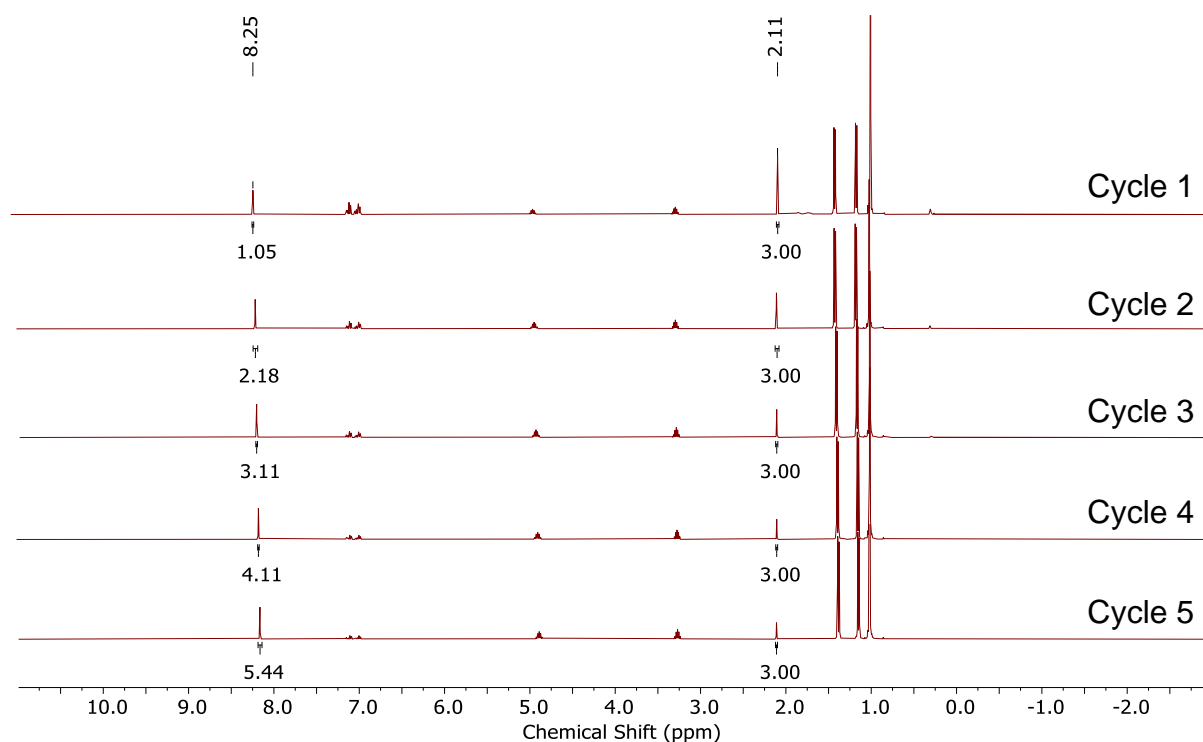

**Figure S171.** Stacked  $^1\text{H}$  NMR spectra in  $\text{C}_6\text{D}_6$  of cycle 1 – 5 of diisopropylcarbodiimide (**4a**) hydroboration.  $\delta$  8.25 ppm =  $i\text{PrN}(\text{B}(\text{pin})\text{CHN}i\text{Pr})$  (1H, **4b**);  $\delta$  2.11 ppm = toluene internal standard resonance.



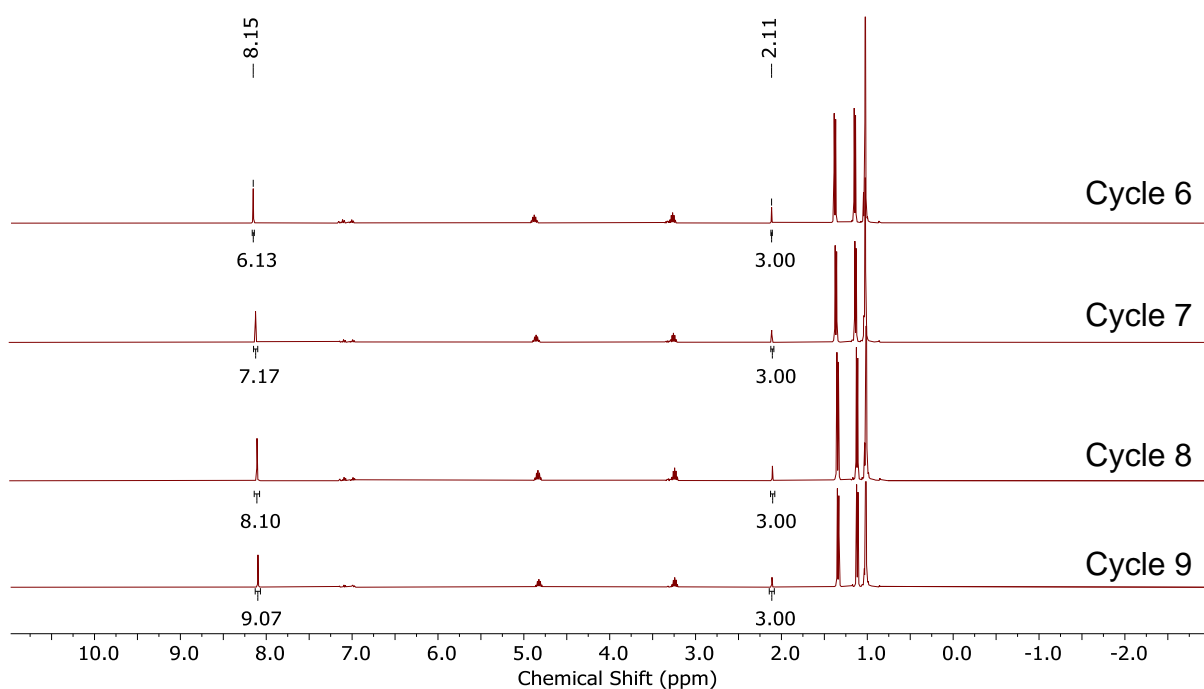

**Figure S172.** Stacked  $^1\text{H}$  NMR spectra in  $\text{C}_6\text{D}_6$  of cycle 6 – 9 of diisopropylcarbodiimide (**4a**) hydroboration.  $\delta$  8.15 ppm =  $i\text{PrN}(\text{B}(\text{pin})\text{CHN})\text{Pr}$  (1H, **4b**);  $\delta$  2.11 ppm = toluene internal standard resonance.

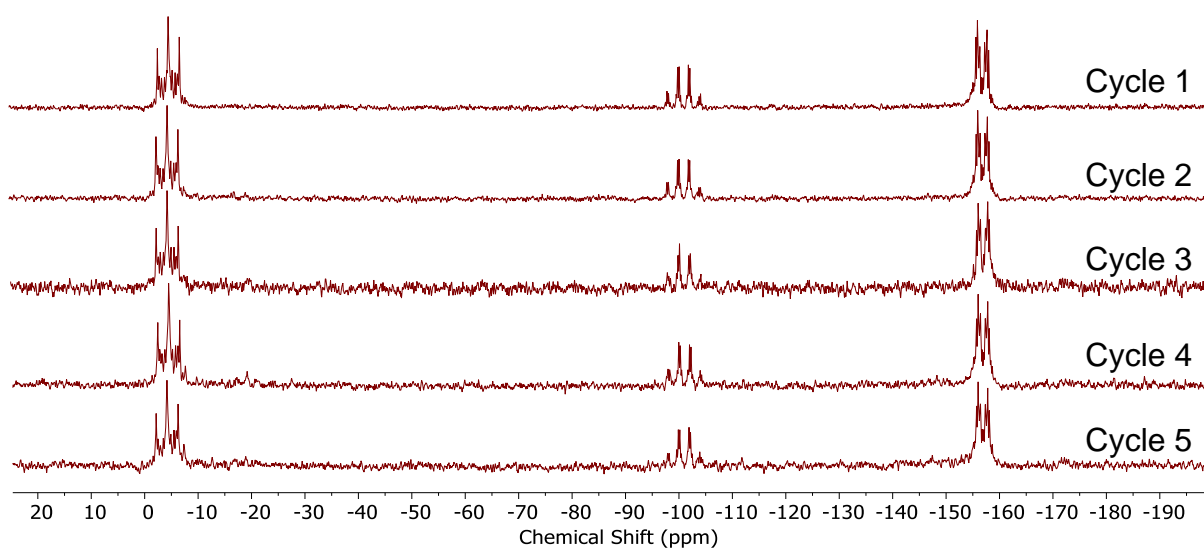

**Figure S173.** Stacked  $^{31}\text{P}\{^1\text{H}\}$  NMR spectra in  $\text{C}_6\text{D}_6$  of cycle 1 – 5 of diisopropylcarbodiimide (**4a**) hydroboration.

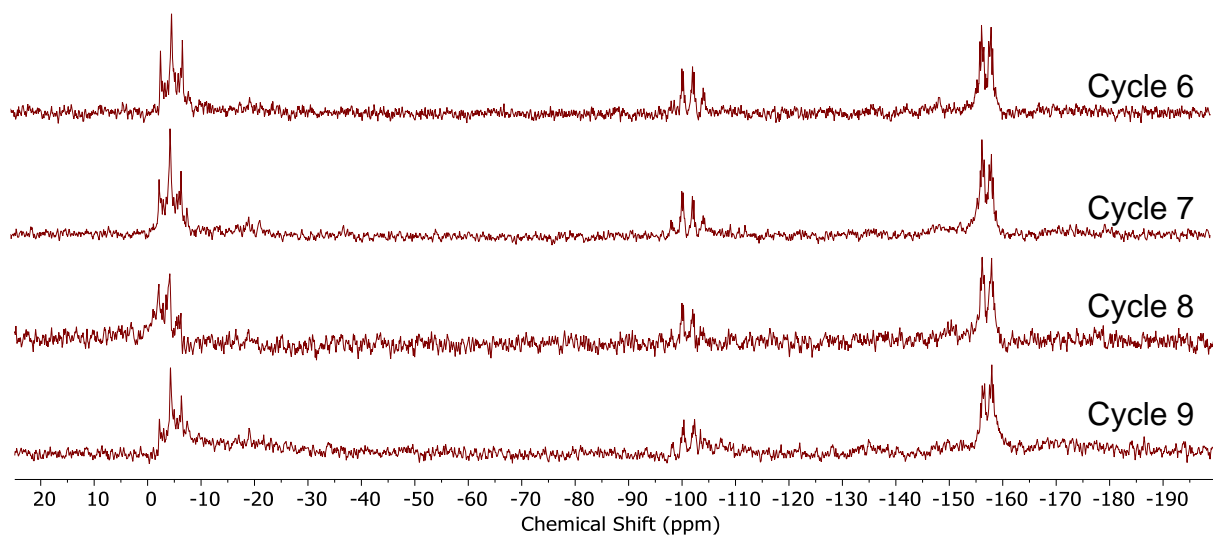

**Figure S174.** Stacked  $^{31}\text{P}\{^1\text{H}\}$  NMR spectra in  $\text{C}_6\text{D}_6$  of cycle 6 – 9 of diisopropylcarbodiimide (**4a**) hydroboration.

## 11. Crystallographic Data

**Table S5.** Crystallographic data for **1** and **2**.

|                                                                       | P <sub>7</sub> (SiMe <sub>2</sub> CHCH <sub>2</sub> ) <sub>3</sub> ( <b>1</b> ) | P <sub>7</sub> (SiMe <sub>2</sub> CH <sub>2</sub> CH <sub>2</sub> BBN) <sub>3</sub> ( <b>2</b> ) |
|-----------------------------------------------------------------------|---------------------------------------------------------------------------------|--------------------------------------------------------------------------------------------------|
| Formula                                                               | C <sub>12</sub> H <sub>27</sub> P <sub>7</sub> Si <sub>3</sub>                  | C <sub>37.67</sub> H <sub>76</sub> B <sub>3</sub> P <sub>7</sub> Si <sub>3</sub>                 |
| Fw                                                                    | 472.39                                                                          | 862.45                                                                                           |
| cryst size, mm                                                        | 0.521 x 0.193 x 0.161                                                           | 0.205 x 0.085 x 0.029                                                                            |
| cryst syst                                                            | monoclinic                                                                      | triclinic                                                                                        |
| space group                                                           | P121/c1                                                                         | P-1                                                                                              |
| collection temperature, K                                             | 100.00(10)                                                                      | 100.00(14)                                                                                       |
| a, Å                                                                  | 6.8678(3)                                                                       | 6.7553(2)                                                                                        |
| b, Å                                                                  | 18.0666(9)                                                                      | 19.7337(10)                                                                                      |
| c, Å                                                                  | 19.2147(10)                                                                     | 20.2549(11)                                                                                      |
| α, °                                                                  | 90                                                                              | 118.487(6)                                                                                       |
| β, °                                                                  | 96.980(5)                                                                       | 90.481(3)                                                                                        |
| γ, °                                                                  | 90                                                                              | 90.417(3)                                                                                        |
| V, Å <sup>3</sup>                                                     | 2366.4(2)                                                                       | 2372.9(2)                                                                                        |
| Z                                                                     | 4                                                                               | 2                                                                                                |
| ρ <sub>calcd</sub> , g cm <sup>-3</sup>                               | 1.326                                                                           | 1.207                                                                                            |
| μ, mm <sup>-1</sup>                                                   | 0.668                                                                           | 3.340                                                                                            |
| no. of reflections made                                               | 11320                                                                           | 31328                                                                                            |
| no. of unique reflns, R <sub>int</sub>                                | 5447, 0.0428                                                                    | 9147, 0.0990                                                                                     |
| no. of reflns with F <sup>2</sup> > 2σ(F <sup>2</sup> )               | 3974                                                                            | 6867                                                                                             |
| transmn coeff range                                                   | 0.51249-1.00000                                                                 | 0.75897-1.00000                                                                                  |
| R, R <sub>w</sub> <sup>a</sup> (F <sup>2</sup> > 2σ(F <sup>2</sup> )) | 0.0430, 0.0842                                                                  | 0.1272, 0.3401                                                                                   |
| R, R <sub>w</sub> <sup>a</sup> (all data)                             | 0.0697, 0.0982                                                                  | 0.1502, 0.3568                                                                                   |
| S <sup>a</sup>                                                        | 1.022                                                                           | 1.050                                                                                            |
| Parameters                                                            | 253, 160                                                                        | 657, 1423                                                                                        |
| max., min. diff map, e Å <sup>-3</sup>                                | 0.513, -0.362                                                                   | 1.344, -0.891                                                                                    |
| CCDC                                                                  | 2192816                                                                         | 2192817                                                                                          |

<sup>a</sup> Conventional R =  $\sum||F_o| - |F_c||/\sum|F_o|$ ; R<sub>w</sub> =  $[\sum w(F_o^2 - F_c^2)^2/\sum w(F_o^2)^2]^{1/2}$ ; S =  $[\sum w(F_o^2 - F_c^2)^2/\text{no. data} - \text{no. params}]^{1/2}$  for all data.

## 12. Geometry Optimized Structures

### 12.1. CF<sub>2</sub>O

Charge = 0 Multiplicity = 1

|   |               |               |              |
|---|---------------|---------------|--------------|
| O | -0.0466230000 | -0.7269130000 | 0.7078620000 |
| C | -0.0198320000 | 0.4570640000  | 0.6604760000 |
| F | -1.0755860000 | 1.2641720000  | 0.6177690000 |
| F | 1.0710410000  | 1.2166780000  | 0.6398920000 |

### 12.2. [CF<sub>3</sub>O]<sup>-</sup>

Charge = -1 Multiplicity = 1

|   |               |               |              |
|---|---------------|---------------|--------------|
| O | -0.0024660000 | -0.0727380000 | 0.7919310000 |
| C | -0.0077480000 | -1.2197580000 | 1.2200720000 |
| F | -0.0372870000 | -1.3904350000 | 2.6566080000 |
| F | 1.1166540000  | -2.0616680000 | 0.8724600000 |
| F | -1.1111530000 | -2.0694010000 | 0.8259280000 |

### 12.3. B(C<sub>6</sub>F<sub>5</sub>)<sub>3</sub>

Charge = 0 Multiplicity = 1

|   |               |               |               |
|---|---------------|---------------|---------------|
| B | -0.1527200000 | 0.4557970000  | -0.1605200000 |
| C | -0.5860590000 | 1.3581700000  | -1.3766080000 |
| C | -0.1083040000 | -1.1107320000 | -0.3176840000 |
| C | 0.2355380000  | 1.1209860000  | 1.2133700000  |
| C | -0.0238350000 | -3.9535890000 | -0.6022600000 |
| C | 0.3991710000  | -3.1282370000 | -1.6617220000 |
| C | 0.3396250000  | -1.7339100000 | -1.5065250000 |
| C | -0.5130710000 | -1.9823330000 | 0.7209530000  |
| C | -0.4887670000 | -3.3807870000 | 0.5971040000  |
| F | 0.0160700000  | -5.2789060000 | -0.7349120000 |
| F | 0.8493990000  | -3.6771200000 | -2.7944170000 |
| F | 0.7672890000  | -0.9904480000 | -2.5413400000 |
| F | -0.9782470000 | -1.4844150000 | 1.8795460000  |
| F | -0.8990550000 | -4.1686170000 | 1.5960760000  |
| C | 0.9379580000  | 2.3272340000  | 3.7079460000  |
| C | 1.6577230000  | 1.2114750000  | 3.2392850000  |
| C | 1.2910990000  | 0.6273090000  | 2.0161560000  |
| C | -0.4498370000 | 2.2498640000  | 1.7217490000  |
| C | -0.1271350000 | 2.8499490000  | 2.9495890000  |
| F | 1.2651870000  | 2.8894560000  | 4.8708630000  |
| F | 2.6748620000  | 0.7255680000  | 3.9577470000  |
| F | 2.0184480000  | -0.4257380000 | 1.6056550000  |
| F | -1.4829100000 | 2.7773710000  | 1.0427140000  |
| F | -0.8136720000 | 3.9032240000  | 3.4036760000  |
| C | -1.3737740000 | 2.9974720000  | -3.5815760000 |
| C | -2.0361030000 | 1.7786450000  | -3.3397880000 |
| C | -1.6274720000 | 0.9825950000  | -2.2575660000 |
| C | 0.0416280000  | 2.5951620000  | -1.6551120000 |
| C | -0.3235410000 | 3.4096670000  | -2.7390890000 |
| F | -1.7413530000 | 3.7617730000  | -4.6093870000 |
| F | -3.0391770000 | 1.3964250000  | -4.1365090000 |
| F | -2.3001260000 | -0.1641980000 | -2.0603520000 |
| F | 1.0588850000  | 3.0253600000  | -0.8892410000 |
| F | 0.3092550000  | 4.5625400000  | -2.9788190000 |

#### 12.4. [FB(C<sub>6</sub>F<sub>5</sub>)<sub>3</sub>]<sup>-</sup>

Charge = -1 Multiplicity = 1

|   |               |               |               |
|---|---------------|---------------|---------------|
| B | -1.0312930000 | 0.2232650000  | 0.0282600000  |
| C | -0.9890050000 | 1.2531340000  | -1.2823180000 |
| C | -0.3707440000 | -1.2773630000 | -0.2797500000 |
| C | -0.2759520000 | 1.0317420000  | 1.2858070000  |
| C | 0.5070170000  | -3.9914620000 | -0.6547500000 |
| C | 0.4773630000  | -3.0981990000 | -1.7352940000 |
| C | 0.0361790000  | -1.7742170000 | -1.5287690000 |
| C | -0.3270790000 | -2.2166340000 | 0.7693280000  |
| C | 0.1011300000  | -3.5465250000 | 0.6148250000  |
| F | 0.9186910000  | -5.2624450000 | -0.8310130000 |
| F | 0.8572570000  | -3.5187830000 | -2.9597680000 |
| F | 0.0221920000  | -0.9984240000 | -2.6379190000 |
| F | -0.6982780000 | -1.8584350000 | 2.0180080000  |
| F | 0.1283960000  | -4.3989990000 | 1.6599830000  |
| C | 0.8329230000  | 2.5318650000  | 3.4745310000  |
| C | 1.5555730000  | 1.4758250000  | 2.8979060000  |
| C | 0.9954700000  | 0.7624780000  | 1.8202290000  |
| C | -0.9522780000 | 2.1116220000  | 1.8861300000  |
| C | -0.4358920000 | 2.8532150000  | 2.9663140000  |
| F | 1.3509140000  | 3.2296770000  | 4.5048280000  |
| F | 2.7781100000  | 1.1653470000  | 3.3773000000  |
| F | 1.7704130000  | -0.2248360000 | 1.3162040000  |
| F | -2.1605890000 | 2.5039580000  | 1.4302660000  |
| F | -1.1318830000 | 3.8755200000  | 3.5062330000  |
| C | -0.8508750000 | 3.1531150000  | -3.4367820000 |
| C | -2.0824890000 | 2.6064350000  | -3.0465420000 |
| C | -2.1310160000 | 1.6724020000  | -1.9899130000 |
| C | 0.2195170000  | 1.8229440000  | -1.7215220000 |
| C | 0.3193290000  | 2.7532990000  | -2.7702760000 |
| F | -0.7891280000 | 4.0449120000  | -4.4458020000 |
| F | -3.2081690000 | 2.9781200000  | -3.6917710000 |
| F | -3.3572600000 | 1.1913170000  | -1.7056160000 |
| F | 1.3867140000  | 1.4601540000  | -1.1373620000 |
| F | 1.5113150000  | 3.2615440000  | -3.1462110000 |
| F | -2.3785710000 | -0.0295660000 | 0.4192040000  |

#### 12.5. SbF<sub>5</sub>

Charge = 0 Multiplicity = 1

|    |               |               |               |
|----|---------------|---------------|---------------|
| F  | -1.9354430000 | 0.7880830000  | 0.0118850000  |
| F  | 0.1865520000  | 1.0762600000  | -1.6358360000 |
| F  | -1.0232240000 | -1.7224270000 | -0.3860040000 |
| F  | 0.2213570000  | 0.5881340000  | 1.6245680000  |
| F  | 1.5235260000  | -0.8318660000 | -0.2673920000 |
| Sb | -0.2057670000 | -0.0211940000 | -0.1292210000 |

#### 12.6. [SbF<sub>6</sub>]<sup>-</sup>

Charge = -1 Multiplicity = 1

|   |               |               |               |
|---|---------------|---------------|---------------|
| F | 0.6934610000  | 1.8491390000  | 0.2844740000  |
| F | 0.2883260000  | -0.4182980000 | 1.7840280000  |
| F | -1.8501630000 | 0.8765200000  | 0.6436940000  |
| F | -0.6454980000 | 0.6963010000  | -1.8202990000 |
| F | 1.4930270000  | -0.5985220000 | -0.6799630000 |
| F | -1.0505750000 | -1.5711420000 | -0.3207950000 |

Sb -0.1785690000 0.1390010000 -0.0181390000

### 12.7. MeSi<sup>+</sup>

Charge = +1 Multiplicity = 1

|    |               |               |               |
|----|---------------|---------------|---------------|
| Si | -0.0002000000 | -0.0001130000 | -0.0000860000 |
| C  | -1.8306730000 | -0.2180430000 | -0.0001470000 |
| C  | 1.1043370000  | -1.4757570000 | 0.0000570000  |
| C  | 0.7265010000  | 1.6938980000  | 0.0000840000  |
| H  | 1.7763700000  | -1.4347240000 | -0.8884030000 |
| H  | 0.5543200000  | -2.4369350000 | 0.0008830000  |
| H  | 1.7777070000  | -1.4337300000 | 0.8874080000  |
| H  | -2.1314140000 | -0.8264600000 | -0.8843510000 |
| H  | -2.3870780000 | 0.7394000000  | -0.0054770000 |
| H  | -2.1314250000 | -0.8157220000 | 0.8914840000  |
| H  | 0.3534440000  | 2.2567190000  | 0.8870480000  |
| H  | 0.3559000000  | 2.2553790000  | -0.8888160000 |
| H  | 1.8339950000  | 1.6970620000  | 0.0014590000  |

### 12.8. MeSiF

Charge = 0 Multiplicity = 1

|    |               |               |               |
|----|---------------|---------------|---------------|
| F  | -2.4514360000 | -0.5755960000 | -1.3668210000 |
| Si | -3.2706670000 | 0.5824720000  | -2.2238730000 |
| C  | -2.7366820000 | 2.2546910000  | -1.5424270000 |
| C  | -5.1083400000 | 0.2732700000  | -1.9531520000 |
| C  | -2.7852850000 | 0.3766130000  | -4.0314760000 |
| H  | -5.7247850000 | 1.0162240000  | -2.5030130000 |
| H  | -5.3718330000 | 0.3455110000  | -0.8770980000 |
| H  | -5.4010510000 | -0.7374200000 | -2.3071960000 |
| H  | -3.2481490000 | 3.0850840000  | -2.0745550000 |
| H  | -1.6423760000 | 2.4030790000  | -1.6563780000 |
| H  | -2.9807280000 | 2.3435440000  | -0.4630480000 |
| H  | -1.6909750000 | 0.5038270000  | -4.1688000000 |
| H  | -3.2961870000 | 1.1270910000  | -4.6718380000 |
| H  | -3.0595060000 | -0.6313930000 | -4.4073280000 |

### 12.9. ({9-BBN}CH<sub>2</sub>CH<sub>2</sub>SiMe<sub>2</sub>)<sub>3</sub>P<sub>7</sub> (2)

Charge = 0 Multiplicity = 1

|    |               |               |               |
|----|---------------|---------------|---------------|
| P  | -0.6739050000 | 0.7135590000  | 0.5579860000  |
| P  | -1.2933050000 | -1.0028710000 | -0.7200560000 |
| P  | -0.3013540000 | 2.1986540000  | -1.0606950000 |
| P  | 1.4369510000  | 0.0951840000  | 0.9047810000  |
| P  | 1.1122900000  | 1.1036760000  | -2.4121640000 |
| P  | 2.1197740000  | -0.4892570000 | -1.1485310000 |
| P  | 0.2543570000  | -0.9951630000 | -2.3385080000 |
| Si | -3.2252910000 | -0.3225750000 | -1.8219680000 |
| Si | 1.0572970000  | 3.8463500000  | -0.1309610000 |
| Si | 1.3425460000  | -1.9430580000 | 2.0310830000  |
| C  | -0.0793020000 | -1.8128280000 | 3.2812880000  |
| C  | 3.0034050000  | -2.0147930000 | 2.9513840000  |
| C  | 1.1586390000  | -3.4546620000 | 0.8887680000  |
| C  | 0.4286990000  | 4.1624320000  | 1.6299640000  |
| C  | 0.7354860000  | 5.3650920000  | -1.2247130000 |
| C  | 2.9167420000  | 3.4185870000  | -0.1451410000 |
| C  | -4.2850820000 | 0.5660710000  | -0.5088940000 |

|   |               |               |               |
|---|---------------|---------------|---------------|
| C | -4.0319550000 | -1.9575730000 | -2.3578810000 |
| C | -2.9362710000 | 0.7658100000  | -3.3451620000 |
| H | -4.3171470000 | -0.0770770000 | 0.3991270000  |
| C | -5.7190310000 | 0.9331640000  | -0.9556160000 |
| H | -3.7318830000 | 1.4805200000  | -0.1972370000 |
| H | -2.4309420000 | 1.7132260000  | -3.0676930000 |
| H | -3.9085840000 | 1.0092570000  | -3.8267260000 |
| H | -2.3066810000 | 0.2449250000  | -4.0961300000 |
| H | -4.2311030000 | -2.6171190000 | -1.4879030000 |
| H | -3.3785080000 | -2.5124770000 | -3.0632740000 |
| H | -4.9966250000 | -1.7649450000 | -2.8752460000 |
| H | 1.2946920000  | 6.2459940000  | -0.8426180000 |
| H | -0.3434410000 | 5.6239860000  | -1.2394020000 |
| H | 1.0570750000  | 5.1855570000  | -2.2720310000 |
| H | 3.1871700000  | 3.1193160000  | -1.1833860000 |
| H | 3.0525980000  | 2.5074920000  | 0.4798480000  |
| C | 3.8373910000  | 4.5855820000  | 0.3466300000  |
| H | 0.9602200000  | 5.0315840000  | 2.0738770000  |
| H | 0.6019830000  | 3.2812420000  | 2.2811310000  |
| H | -0.6576810000 | 4.3882670000  | 1.6355460000  |
| H | 3.0652900000  | -2.9329730000 | 3.5746560000  |
| H | 3.1272900000  | -1.1388130000 | 3.6211220000  |
| H | 3.8584400000  | -2.0257580000 | 2.2433490000  |
| H | -0.0747510000 | -2.6951840000 | 3.9572210000  |
| H | -1.0631050000 | -1.7740360000 | 2.7702870000  |
| H | 0.0198320000  | -0.9037790000 | 3.9098690000  |
| H | 0.2274070000  | -3.3180920000 | 0.2960360000  |
| C | 1.1433450000  | -4.8231100000 | 1.6095370000  |
| H | 1.9873420000  | -3.4159500000 | 0.1461700000  |
| H | -6.2904180000 | 0.0211030000  | -1.2620490000 |
| H | -5.7056570000 | 1.5331620000  | -1.8999610000 |
| H | 3.5513690000  | 4.8806950000  | 1.3802960000  |
| H | 3.7046140000  | 5.4703420000  | -0.3143170000 |
| H | 0.3316390000  | -4.8709370000 | 2.3750980000  |
| H | 2.0689420000  | -4.9615800000 | 2.2276870000  |
| B | 1.0737620000  | -6.1430180000 | 0.7381240000  |
| C | 0.8067370000  | -7.5698660000 | 1.3796640000  |
| H | 0.7404110000  | -7.5343410000 | 2.4907980000  |
| C | -0.5943150000 | -8.0141450000 | 0.8475170000  |
| H | -0.8341590000 | -9.0354790000 | 1.2244670000  |
| H | -1.3603400000 | -7.3440970000 | 1.3029570000  |
| C | -0.7557580000 | -7.9762350000 | -0.6889050000 |
| H | -1.8345430000 | -8.0747440000 | -0.9427190000 |
| H | -0.2720640000 | -8.8673880000 | -1.1379250000 |
| C | -0.1991460000 | -6.6931920000 | -1.3464050000 |
| H | -0.1724260000 | -6.8205000000 | -2.4534290000 |
| H | -0.9148460000 | -5.8586870000 | -1.1629980000 |
| C | 1.2079580000  | -6.2368510000 | -0.8363060000 |
| H | 1.4241400000  | -5.2564110000 | -1.3135680000 |
| C | 2.3749240000  | -7.2060810000 | -1.1918310000 |
| H | 2.4289130000  | -7.3466940000 | -2.2962930000 |
| H | 3.3288810000  | -6.7016310000 | -0.9127800000 |
| C | 2.3241480000  | -8.5857470000 | -0.4993350000 |
| H | 3.3074360000  | -9.0910770000 | -0.6249490000 |
| H | 1.5977840000  | -9.2406330000 | -1.0225740000 |
| C | 1.9789290000  | -8.5242510000 | 1.0051690000  |
| H | 2.8819420000  | -8.1846970000 | 1.5638620000  |
| H | 1.7697230000  | -9.5528770000 | 1.3808020000  |
| B | -6.6603680000 | 1.7164020000  | 0.0473210000  |
| C | -6.2944850000 | 2.1921960000  | 1.5129560000  |

|   |                |              |               |
|---|----------------|--------------|---------------|
| H | -5.2808830000  | 1.8678210000 | 1.8350820000  |
| C | -6.2866230000  | 3.7551640000 | 1.4714180000  |
| H | -6.0783730000  | 4.1564150000 | 2.4903510000  |
| H | -5.4205230000  | 4.0747060000 | 0.8465060000  |
| C | -7.5692690000  | 4.4078390000 | 0.9095190000  |
| H | -7.3681970000  | 5.4823080000 | 0.7023760000  |
| H | -8.3602740000  | 4.4088970000 | 1.6867050000  |
| C | -8.1026400000  | 3.7386660000 | -0.3772220000 |
| H | -9.1217940000  | 4.1279610000 | -0.6061480000 |
| H | -7.4657340000  | 4.0577430000 | -1.2348590000 |
| C | -8.1244530000  | 2.1764860000 | -0.3560350000 |
| H | -8.4149890000  | 1.8365440000 | -1.3758930000 |
| C | -9.1347870000  | 1.5532750000 | 0.6539870000  |
| H | -10.1655600000 | 1.9171910000 | 0.4354270000  |
| H | -9.1646360000  | 0.4545150000 | 0.4677950000  |
| C | -8.8091030000  | 1.7925060000 | 2.1450370000  |
| H | -9.4373090000  | 1.1163300000 | 2.7662810000  |
| H | -9.1183200000  | 2.8171980000 | 2.4355370000  |
| C | -7.3237550000  | 1.5734480000 | 2.5073530000  |
| H | -7.1277470000  | 0.4773580000 | 2.5578270000  |
| H | -7.1318420000  | 1.9546140000 | 3.5371860000  |
| B | 5.2863560000   | 3.9663390000 | 0.2589380000  |
| C | 6.0329520000   | 3.2593260000 | 1.4640810000  |
| H | 5.3877600000   | 3.1454710000 | 2.3638470000  |
| C | 6.5365190000   | 1.8469780000 | 1.0504440000  |
| H | 7.1533420000   | 1.4041830000 | 1.8670450000  |
| H | 5.6429390000   | 1.1875620000 | 0.9625090000  |
| C | 7.3264500000   | 1.7859530000 | -0.2765250000 |
| H | 7.4114700000   | 0.7241690000 | -0.5974980000 |
| H | 8.3716660000   | 2.1170620000 | -0.1061830000 |
| C | 6.7003020000   | 2.6078740000 | -1.4255280000 |
| H | 7.4269060000   | 2.6755230000 | -2.2686240000 |
| H | 5.8287050000   | 2.0445890000 | -1.8304370000 |
| C | 6.1994700000   | 4.0273810000 | -1.0343610000 |
| H | 5.6738470000   | 4.4618110000 | -1.9142190000 |
| C | 7.3330270000   | 5.0330170000 | -0.6356040000 |
| H | 8.0587280000   | 5.1311970000 | -1.4759730000 |
| H | 6.8728900000   | 6.0421870000 | -0.5220010000 |
| C | 8.0888050000   | 4.6844820000 | 0.6666620000  |
| H | 8.7007780000   | 5.5606200000 | 0.9763620000  |
| H | 8.8209320000   | 3.8762810000 | 0.4685330000  |
| C | 7.1665240000   | 4.2749800000 | 1.8365910000  |
| H | 6.6846960000   | 5.1918680000 | 2.2493310000  |
| H | 7.7798230000   | 3.8619590000 | 2.6708200000  |

12.10.  $[(\{9\text{-BBN}\}\text{CH}_2\text{CH}_2\text{SiMe}_2)_2(\{9\text{-BBN}\}\text{FCH}_2\text{CH}_2\text{SiMe}_2)\text{P}_7]^-$

Charge = -1 Multiplicity = 1

|    |               |               |               |
|----|---------------|---------------|---------------|
| P  | -0.1768540000 | 0.8965930000  | 0.4641230000  |
| P  | -1.1692340000 | -0.6307540000 | -0.8053860000 |
| P  | 0.4634900000  | 2.2877050000  | -1.1572530000 |
| P  | 1.7855690000  | -0.1275790000 | 0.7583610000  |
| P  | 1.6004650000  | 0.9443570000  | -2.5435670000 |
| P  | 2.2887600000  | -0.8370330000 | -1.3093380000 |
| P  | 0.3212280000  | -0.9277470000 | -2.4423710000 |
| Si | -3.0674370000 | 0.3698450000  | -1.7649930000 |
| Si | 2.1175660000  | 3.6332680000  | -0.2565690000 |
| Si | 1.2730150000  | -2.0974450000 | 1.8757980000  |
| C  | 0.0142080000  | -1.6464550000 | 3.2239320000  |



|   |               |               |               |
|---|---------------|---------------|---------------|
| C | 2.9171900000  | -2.6065080000 | 2.6932840000  |
| C | 0.6352660000  | -3.5109260000 | 0.7689370000  |
| C | 1.5150030000  | 4.1944260000  | 1.4526860000  |
| C | 2.1853340000  | 5.1246050000  | -1.4352070000 |
| C | 3.8529640000  | 2.8361420000  | -0.1437590000 |
| C | -4.0474380000 | 1.1511220000  | -0.3572230000 |
| C | -3.9405680000 | -1.1534280000 | -2.4992210000 |
| C | -2.6422780000 | 1.5704000000  | -3.1711900000 |
| H | -4.1956800000 | 0.3922020000  | 0.4441740000  |
| C | -5.4325590000 | 1.6815490000  | -0.8071790000 |
| H | -3.4417400000 | 1.9639400000  | 0.1041380000  |
| H | -2.0226490000 | 2.4150350000  | -2.8068380000 |
| H | -3.5903090000 | 1.9818120000  | -3.5808090000 |
| H | -2.0948630000 | 1.0650670000  | -3.9938600000 |
| H | -4.1767240000 | -1.8953340000 | -1.7086990000 |
| H | -3.3252800000 | -1.6506150000 | -3.2782910000 |
| H | -4.8989860000 | -0.8360460000 | -2.9632570000 |
| H | 2.8987470000  | 5.8916410000  | -1.0643020000 |
| H | 1.1850330000  | 5.5976200000  | -1.5204930000 |
| H | 2.5053670000  | 4.8202540000  | -2.4539060000 |
| H | 4.0804300000  | 2.3791190000  | -1.1332750000 |
| H | 3.7710250000  | 1.9845120000  | 0.5686540000  |
| C | 4.9842070000  | 3.8362330000  | 0.2741890000  |
| H | 2.2020430000  | 4.9591080000  | 1.8752450000  |
| H | 1.4650110000  | 3.3409510000  | 2.1597370000  |
| H | 0.5019290000  | 4.6426010000  | 1.3874200000  |
| H | 2.7759090000  | -3.5067490000 | 3.3301930000  |
| H | 3.3107060000  | -1.7917900000 | 3.3361410000  |
| H | 3.6904960000  | -2.8445940000 | 1.9328500000  |
| H | -0.1749030000 | -2.5198890000 | 3.8851410000  |
| H | -0.9526560000 | -1.3313950000 | 2.7799940000  |
| H | 0.3859930000  | -0.8148740000 | 3.8578210000  |
| H | -0.2949400000 | -3.1424480000 | 0.2829640000  |
| C | 0.3828890000  | -4.8539380000 | 1.4900420000  |
| H | 1.3636310000  | -3.6469550000 | -0.0624800000 |
| H | -5.9710000000 | 0.8897220000  | -1.3844150000 |
| H | -5.3018500000 | 2.5353460000  | -1.5117350000 |
| H | 4.7276300000  | 4.3179000000  | 1.2434760000  |
| H | 5.0722940000  | 4.6351550000  | -0.4949240000 |
| H | -0.3377630000 | -4.7207720000 | 2.3385150000  |
| H | 1.2995320000  | -5.2219580000 | 2.0145460000  |
| B | -0.2073190000 | -6.0682640000 | 0.6681720000  |
| C | -0.3797870000 | -7.5141880000 | 1.3051010000  |
| H | -0.0539800000 | -7.5522530000 | 2.3696260000  |
| C | -1.8939490000 | -7.8835880000 | 1.2640430000  |
| H | -2.0442280000 | -8.9220730000 | 1.6424350000  |
| H | -2.4218720000 | -7.2246660000 | 1.9917110000  |
| C | -2.5717370000 | -7.7341780000 | -0.1163400000 |
| H | -3.6756430000 | -7.7770690000 | 0.0165400000  |
| H | -2.3253820000 | -8.6105930000 | -0.7505770000 |
| C | -2.2059680000 | -6.4303600000 | -0.8603380000 |
| H | -2.5663930000 | -6.4896100000 | -1.9135150000 |
| H | -2.7731290000 | -5.5874820000 | -0.4036280000 |
| C | -0.6937320000 | -6.0476860000 | -0.8390030000 |
| H | -0.5965500000 | -5.0458920000 | -1.3096760000 |
| C | 0.2380800000  | -7.0240910000 | -1.6245930000 |
| H | -0.0921770000 | -7.0876230000 | -2.6875520000 |
| H | 1.2554720000  | -6.5700060000 | -1.6596560000 |
| C | 0.3523260000  | -8.4472780000 | -1.0333660000 |
| H | 1.2041930000  | -8.9752880000 | -1.5176480000 |

|   |               |               |               |
|---|---------------|---------------|---------------|
| H | -0.5456900000 | -9.0380080000 | -1.3065300000 |
| C | 0.5473190000  | -8.4766780000 | 0.4995830000  |
| H | 1.6036190000  | -8.2021030000 | 0.7284040000  |
| H | 0.4264520000  | -9.5215360000 | 0.8710020000  |
| B | 6.2552740000  | 2.9121110000  | 0.3525720000  |
| C | 6.8404910000  | 2.2866880000  | 1.6876680000  |
| H | 6.1860290000  | 2.4688200000  | 2.5692370000  |
| C | 7.0450690000  | 0.7527830000  | 1.5474190000  |
| H | 7.5646360000  | 0.3483660000  | 2.4479500000  |
| H | 6.0362830000  | 0.2814370000  | 1.5496930000  |
| C | 7.7983500000  | 0.2971790000  | 0.2769290000  |
| H | 7.6607350000  | -0.7996150000 | 0.1499680000  |
| H | 8.8906560000  | 0.4336750000  | 0.4195670000  |
| C | 7.3484010000  | 1.0113840000  | -1.0176980000 |
| H | 8.0662250000  | 0.7725930000  | -1.8373780000 |
| H | 6.3739420000  | 0.5794790000  | -1.3407560000 |
| C | 7.1608140000  | 2.5498340000  | -0.8984600000 |
| H | 6.7342690000  | 2.9201170000  | -1.8575540000 |
| C | 8.4803820000  | 3.3528490000  | -0.6446840000 |
| H | 9.2132340000  | 3.1430730000  | -1.4587350000 |
| H | 8.2422080000  | 4.4385090000  | -0.7319310000 |
| C | 9.1463250000  | 3.1032840000  | 0.7286100000  |
| H | 9.9231810000  | 3.8814530000  | 0.9022520000  |
| H | 9.7000060000  | 2.1427720000  | 0.7056960000  |
| C | 8.1570920000  | 3.1042590000  | 1.9169210000  |
| H | 7.8722680000  | 4.1583890000  | 2.1430130000  |
| H | 8.6738330000  | 2.7340270000  | 2.8332150000  |
| C | -7.9339070000 | 2.4750470000  | 0.0685610000  |
| H | -8.3800290000 | 1.6697000000  | -0.5673540000 |
| C | -7.2176250000 | 4.9808230000  | -0.1274250000 |
| H | -7.8906910000 | 5.4453660000  | 0.6246550000  |
| H | -7.0598050000 | 5.7733140000  | -0.8976460000 |
| C | -8.7881620000 | 2.5524820000  | 1.3580690000  |
| H | -9.8503910000 | 2.8311800000  | 1.1340250000  |
| H | -8.8210380000 | 1.5260730000  | 1.7866800000  |
| C | -8.2480640000 | 3.5133640000  | 2.4465110000  |
| H | -8.7783300000 | 3.3119450000  | 3.4080420000  |
| H | -8.5228150000 | 4.5591470000  | 2.1867800000  |
| C | -7.9374330000 | 3.7721170000  | -0.7756570000 |
| H | -7.4394850000 | 3.5493060000  | -1.7479820000 |
| H | -8.9792330000 | 4.0862430000  | -1.0438030000 |
| B | -6.3912990000 | 2.0667300000  | 0.5004550000  |
| F | -6.4211030000 | 0.8562440000  | 1.3397110000  |
| C | -5.8565170000 | 3.3488190000  | 1.3969020000  |
| H | -4.8024760000 | 3.1883190000  | 1.7348640000  |
| C | -6.7192740000 | 3.4262350000  | 2.6824720000  |
| H | -6.4124810000 | 4.2834130000  | 3.3358080000  |
| H | -6.5111820000 | 2.5019670000  | 3.2661020000  |
| C | -5.8638810000 | 4.6417560000  | 0.5449270000  |
| H | -5.0954460000 | 4.5292920000  | -0.2556840000 |
| H | -5.5369720000 | 5.5312360000  | 1.1427010000  |

12.11.  $[(\{9\text{-BBN}\}\text{CH}_2\text{CH}_2\text{SiMe}_2)(\{9\text{-BBN}\}\text{FCH}_2\text{CH}_2\text{SiMe}_2)_2\text{P}_7]^{2-}$

Charge = -2 Multiplicity = 1

|   |               |               |               |
|---|---------------|---------------|---------------|
| P | 0.0511980000  | 0.9239340000  | 0.5636920000  |
| P | -1.3840850000 | -0.2168920000 | -0.6920310000 |
| P | 1.1158770000  | 2.0812190000  | -1.0144450000 |
| P | 1.5971600000  | -0.6759530000 | 0.8047300000  |

|    |               |               |               |
|----|---------------|---------------|---------------|
| P  | 1.7143830000  | 0.4837170000  | -2.4553280000 |
| P  | 1.8251090000  | -1.4569580000 | -1.2877710000 |
| P  | -0.0877800000 | -0.8945290000 | -2.3848350000 |
| Si | -2.9438140000 | 1.2431950000  | -1.6489100000 |
| Si | 3.1669130000  | 2.7826660000  | -0.0851570000 |
| Si | 0.5082140000  | -2.4224540000 | 1.8650150000  |
| C  | -0.6110090000 | -1.6678480000 | 3.2042570000  |
| C  | 1.9037370000  | -3.4069150000 | 2.7145620000  |
| C  | -0.4778150000 | -3.5977030000 | 0.7281410000  |
| C  | 2.8034520000  | 3.1135980000  | 1.7537410000  |
| C  | 3.3872990000  | 4.4559870000  | -0.9747460000 |
| C  | 4.6802910000  | 1.6802120000  | -0.3535970000 |
| C  | -4.1338880000 | 1.8162820000  | -0.2924460000 |
| C  | -3.8311180000 | 0.0876250000  | -2.8799680000 |
| C  | -2.1658430000 | 2.6774440000  | -2.6166480000 |
| H  | -4.6096040000 | 0.9134520000  | 0.1544230000  |
| C  | -5.2354300000 | 2.7674490000  | -0.8319370000 |
| H  | -3.5637220000 | 2.2978840000  | 0.5337750000  |
| H  | -1.5540050000 | 3.3283520000  | -1.9599760000 |
| H  | -2.9788970000 | 3.2888460000  | -3.0652850000 |
| H  | -1.5069990000 | 2.3070630000  | -3.4287970000 |
| H  | -4.2542190000 | -0.7989260000 | -2.3633430000 |
| H  | -3.1463340000 | -0.2642530000 | -3.6796670000 |
| H  | -4.6733760000 | 0.6379570000  | -3.3519330000 |
| H  | 4.3016440000  | 4.9649830000  | -0.6020700000 |
| H  | 2.5155630000  | 5.1232870000  | -0.8103420000 |
| H  | 3.5075400000  | 4.3072820000  | -2.0686900000 |
| H  | 4.8152690000  | 1.5208670000  | -1.4479240000 |
| H  | 4.4837480000  | 0.6735280000  | 0.0781780000  |
| C  | 5.9717590000  | 2.3062230000  | 0.2377620000  |
| H  | 3.6741370000  | 3.6358820000  | 2.2054930000  |
| H  | 2.6518820000  | 2.1608760000  | 2.3018960000  |
| H  | 1.9020190000  | 3.7456370000  | 1.8936320000  |
| H  | 1.4915980000  | -4.2437490000 | 3.3202930000  |
| H  | 2.4919010000  | -2.7517990000 | 3.3905370000  |
| H  | 2.6058310000  | -3.8346660000 | 1.9681590000  |
| H  | -1.0410730000 | -2.4614820000 | 3.8536660000  |
| H  | -1.4463540000 | -1.0997870000 | 2.7458130000  |
| H  | -0.0390200000 | -0.9705340000 | 3.8512060000  |
| H  | -1.2150970000 | -2.9715830000 | 0.1786690000  |
| C  | -1.1855660000 | -4.7688750000 | 1.4451370000  |
| H  | 0.2225800000  | -3.9799130000 | -0.0484050000 |
| H  | -5.6627630000 | 2.3498610000  | -1.7782730000 |
| H  | -4.7681500000 | 3.7368510000  | -1.1234090000 |
| H  | 5.8895140000  | 2.3414900000  | 1.3495530000  |
| H  | 6.0516890000  | 3.3740500000  | -0.0860600000 |
| H  | -1.8703660000 | -4.3988030000 | 2.2483760000  |
| H  | -0.4539940000 | -5.3875180000 | 2.0299740000  |
| B  | -1.9913510000 | -5.8260940000 | 0.5958950000  |
| C  | -2.8952540000 | -6.9463340000 | 1.2739250000  |
| H  | -2.8256270000 | -6.9327630000 | 2.3857150000  |
| C  | -4.3684740000 | -6.5863990000 | 0.8976230000  |
| H  | -5.0646680000 | -7.3588120000 | 1.3026280000  |
| H  | -4.6321680000 | -5.6424240000 | 1.4277950000  |
| C  | -4.6319990000 | -6.3909600000 | -0.6131040000 |
| H  | -5.6252270000 | -5.9078730000 | -0.7477440000 |
| H  | -4.7202900000 | -7.3806110000 | -1.1075680000 |
| C  | -3.5578560000 | -5.5426410000 | -1.3312330000 |
| H  | -3.7098410000 | -5.6027800000 | -2.4341260000 |
| H  | -3.7141610000 | -4.4709130000 | -1.0719060000 |

|   |               |               |               |
|---|---------------|---------------|---------------|
| C | -2.0770730000 | -5.9078240000 | -0.9839660000 |
| H | -1.4299940000 | -5.1569420000 | -1.4859640000 |
| C | -1.6269010000 | -7.3202130000 | -1.4580550000 |
| H | -1.7705780000 | -7.4179150000 | -2.5598040000 |
| H | -0.5265180000 | -7.3951450000 | -1.2974370000 |
| C | -2.3105120000 | -8.5090960000 | -0.7454110000 |
| H | -1.7479740000 | -9.4430140000 | -0.9721320000 |
| H | -3.3211900000 | -8.6704130000 | -1.1738770000 |
| C | -2.4216540000 | -8.3466030000 | 0.7872590000  |
| H | -1.4204180000 | -8.5401080000 | 1.2387030000  |
| H | -3.0889640000 | -9.1425410000 | 1.1958020000  |
| C | -7.6929940000 | 3.9562890000  | -0.4262170000 |
| H | -7.9996000000 | 3.5883280000  | -1.4377850000 |
| C | -6.5207420000 | 6.0324240000  | 0.6494360000  |
| H | -7.3298980000 | 6.4177610000  | 1.3071500000  |
| H | -5.9408790000 | 6.9392980000  | 0.3527350000  |
| C | -8.9421160000 | 3.8600160000  | 0.4832830000  |
| H | -9.7812310000 | 4.5043570000  | 0.1102070000  |
| H | -9.3045860000 | 2.8095110000  | 0.4220590000  |
| C | -8.6934950000 | 4.1945020000  | 1.9753560000  |
| H | -9.5744800000 | 3.8626100000  | 2.5767820000  |
| H | -8.6622350000 | 5.2986270000  | 2.1072530000  |
| C | -7.1522570000 | 5.3943500000  | -0.6133280000 |
| H | -6.3780230000 | 5.3666180000  | -1.4149800000 |
| H | -7.9462520000 | 6.0880390000  | -0.9962540000 |
| B | -6.5196880000 | 2.9694020000  | 0.2037720000  |
| F | -7.0890620000 | 1.6269880000  | 0.4257490000  |
| C | -6.1518300000 | 3.6521130000  | 1.6657020000  |
| H | -5.3500040000 | 3.0685880000  | 2.1816780000  |
| C | -7.4076050000 | 3.5656280000  | 2.5685630000  |
| H | -7.2254430000 | 4.0198120000  | 3.5774900000  |
| H | -7.6026300000 | 2.4844570000  | 2.7463050000  |
| C | -5.6067220000 | 5.0859410000  | 1.4668520000  |
| H | -4.6269480000 | 5.0078790000  | 0.9409930000  |
| H | -5.3766370000 | 5.5813870000  | 2.4456220000  |
| C | 7.5969870000  | 0.0179450000  | 0.2808090000  |
| H | 6.7232640000  | -0.6260730000 | 0.0140230000  |
| C | 8.7871060000  | 0.9487950000  | 2.4169710000  |
| H | 9.7843720000  | 0.4654460000  | 2.3284650000  |
| H | 8.6202150000  | 1.0540280000  | 3.5162330000  |
| C | 8.8238400000  | -0.5782360000 | -0.4535890000 |
| H | 9.0365670000  | -1.6285730000 | -0.1235800000 |
| H | 8.5542730000  | -0.6411750000 | -1.5313420000 |
| C | 10.1314060000 | 0.2450220000  | -0.3325960000 |
| H | 10.8675810000 | -0.1244070000 | -1.0873300000 |
| H | 10.6095500000 | 0.0394630000  | 0.6506000000  |
| C | 7.7098440000  | 0.0058200000  | 1.8240270000  |
| H | 6.7188340000  | 0.3025840000  | 2.2392440000  |
| H | 7.8960080000  | -1.0274720000 | 2.2171010000  |
| B | 7.3716190000  | 1.5637100000  | -0.2666760000 |
| F | 7.3307630000  | 1.5586920000  | -1.7392910000 |
| C | 8.7285840000  | 2.3767010000  | 0.2292220000  |
| H | 8.6620370000  | 3.4503350000  | -0.0798540000 |
| C | 9.9488430000  | 1.7733320000  | -0.5079970000 |
| H | 10.9059430000 | 2.2804470000  | -0.2153970000 |
| H | 9.8057670000  | 1.9813510000  | -1.5918730000 |
| C | 8.8438200000  | 2.3563290000  | 1.7718870000  |
| H | 8.0050770000  | 2.9633120000  | 2.1855120000  |
| H | 9.7786140000  | 2.8663330000  | 2.1247830000  |

12.12.  $[(9\text{-BBN})\text{CH}_2\text{CH}_2\text{FSiMe}_2)_3\text{P}_7]^{3-}$ 

Charge = -3 Multiplicity = 1

|    |               |               |               |
|----|---------------|---------------|---------------|
| P  | 0.0673940000  | 0.4554300000  | 0.5499620000  |
| P  | -0.5288750000 | 1.8084400000  | -1.1179970000 |
| P  | 1.8680330000  | -0.4832480000 | -0.3957520000 |
| P  | -1.3984890000 | -1.1919900000 | 0.1711750000  |
| P  | 1.0365770000  | -1.2370920000 | -2.3264060000 |
| P  | -1.2041000000 | -1.4856840000 | -2.0374700000 |
| P  | -0.3752120000 | 0.4504870000  | -2.8912330000 |
| Si | 1.0675760000  | 3.4738840000  | -1.5138230000 |
| Si | 2.3976310000  | -2.4552710000 | 0.7567880000  |
| Si | -3.5787900000 | -0.3733770000 | 0.4363450000  |
| C  | -4.1207690000 | 0.8088870000  | -0.9484240000 |
| C  | -3.5185280000 | 0.5618690000  | 2.0941430000  |
| C  | -4.7444890000 | -1.8740440000 | 0.5328600000  |
| C  | 1.2203180000  | -3.8951430000 | 0.3746120000  |
| C  | 2.2539980000  | -1.9824740000 | 2.5961740000  |
| C  | 4.1904310000  | -2.8953000000 | 0.2986830000  |
| C  | 0.6984370000  | 4.9440690000  | -0.3692380000 |
| C  | 0.6880280000  | 3.9601030000  | -3.3206730000 |
| C  | 2.8742380000  | 2.9035530000  | -1.4003110000 |
| H  | -0.3631150000 | 5.2392270000  | -0.5334580000 |
| C  | 1.6156800000  | 6.1730600000  | -0.6196520000 |
| H  | 0.7558020000  | 4.6162090000  | 0.6938160000  |
| H  | 3.1313130000  | 2.5761390000  | -0.3726480000 |
| H  | 3.5365540000  | 3.7542470000  | -1.6729320000 |
| H  | 3.0797700000  | 2.0517350000  | -2.0797470000 |
| H  | -0.3842530000 | 4.2187220000  | -3.4457440000 |
| H  | 0.9331860000  | 3.1409340000  | -4.0284070000 |
| H  | 1.2872620000  | 4.8567270000  | -3.5902610000 |
| H  | 2.6198760000  | -2.8237540000 | 3.2236910000  |
| H  | 1.2025110000  | -1.7638920000 | 2.8752170000  |
| H  | 2.8705140000  | -1.0893580000 | 2.8292220000  |
| H  | 4.8469230000  | -2.0386010000 | 0.5732760000  |
| H  | 4.2650710000  | -2.9779160000 | -0.8106200000 |
| C  | 4.7099200000  | -4.1917240000 | 0.9772970000  |
| H  | 1.5039170000  | -4.7741150000 | 0.9932680000  |
| H  | 1.2917630000  | -4.1912980000 | -0.6929890000 |
| H  | 0.1675470000  | -3.6193820000 | 0.5897640000  |
| H  | -4.5454600000 | 0.8825730000  | 2.3729530000  |
| H  | -2.8715030000 | 1.4610540000  | 2.0297930000  |
| H  | -3.1323290000 | -0.0888180000 | 2.9063630000  |
| H  | -5.1512370000 | 1.1701010000  | -0.7401630000 |
| H  | -4.1320410000 | 0.2869070000  | -1.9284030000 |
| H  | -3.4364180000 | 1.6780480000  | -1.0283530000 |
| H  | -4.6538190000 | -2.4482910000 | -0.4184760000 |
| C  | -6.2248660000 | -1.4865820000 | 0.7965850000  |
| H  | -4.3865600000 | -2.5658380000 | 1.3283260000  |
| H  | 1.7105800000  | 6.3486060000  | -1.7211320000 |
| H  | 2.6497600000  | 5.9351740000  | -0.2756650000 |
| H  | 4.0860400000  | -5.0537320000 | 0.6408930000  |
| H  | 4.5360790000  | -4.1229670000 | 2.0809270000  |
| H  | -6.5674760000 | -0.7927300000 | -0.0074790000 |
| H  | -6.2821250000 | -0.8862030000 | 1.7389740000  |
| C  | 1.9707210000  | 8.9053050000  | -0.3714550000 |
| H  | 2.1041330000  | 8.9523670000  | -1.4818220000 |
| C  | 3.4098150000  | 8.5503010000  | 1.7807510000  |
| H  | 3.2465360000  | 9.5188600000  | 2.3022060000  |
| H  | 4.4355080000  | 8.2310110000  | 2.0862500000  |

|   |                |               |               |
|---|----------------|---------------|---------------|
| C | 1.2005170000   | 10.1835390000 | 0.0404800000  |
| H | 1.7748590000   | 11.1164710000 | -0.2052400000 |
| H | 0.2758340000   | 10.2142490000 | -0.5780400000 |
| C | 0.7830070000   | 10.2455090000 | 1.5313010000  |
| H | 0.0355000000   | 11.0649800000 | 1.6691120000  |
| H | 1.6567730000   | 10.5543360000 | 2.1467260000  |
| C | 3.3822570000   | 8.7862340000  | 0.2495650000  |
| H | 3.9007520000   | 7.9314910000  | -0.2433880000 |
| H | 4.0138210000   | 9.6861000000  | 0.0222780000  |
| B | 1.0398320000   | 7.5894220000  | 0.0280130000  |
| F | -0.3135710000  | 7.7847100000  | -0.5258050000 |
| C | 0.9604300000   | 7.6389910000  | 1.6823090000  |
| H | 0.3628530000   | 6.7781720000  | 2.0702870000  |
| C | 0.1983480000   | 8.9239470000  | 2.0911680000  |
| H | 0.1110480000   | 9.0215950000  | 3.2053080000  |
| H | -0.8403250000  | 8.8175320000  | 1.7065400000  |
| C | 2.3768400000   | 7.5155720000  | 2.2930980000  |
| H | 2.7600460000   | 6.4957690000  | 2.0591660000  |
| H | 2.3517890000   | 7.5723010000  | 3.4127480000  |
| C | 6.8066820000   | -4.7741530000 | -0.7953510000 |
| H | 6.4963700000   | -3.9310370000 | -1.4602870000 |
| C | 6.3219700000   | -7.3265340000 | -0.4833180000 |
| H | 7.3251470000   | -7.7583810000 | -0.6928860000 |
| H | 5.5999990000   | -8.1104960000 | -0.8175100000 |
| C | 8.3544300000   | -4.8110390000 | -0.8265080000 |
| H | 8.7474070000   | -5.0022030000 | -1.8601040000 |
| H | 8.7051840000   | -3.7934560000 | -0.5439890000 |
| C | 9.0108180000   | -5.8295900000 | 0.1395850000  |
| H | 10.1028230000  | -5.6054800000 | 0.2218670000  |
| H | 8.9656710000   | -6.8473750000 | -0.3081640000 |
| C | 6.1262650000   | -6.0514970000 | -1.3420910000 |
| H | 5.0333090000   | -5.8478660000 | -1.4181290000 |
| H | 6.4565620000   | -6.2824830000 | -2.3889340000 |
| B | 6.3290190000   | -4.4868450000 | 0.7667290000  |
| F | 7.0529270000   | -3.3097180000 | 1.2792590000  |
| C | 6.8436290000   | -5.8309900000 | 1.5971900000  |
| H | 6.5482510000   | -5.7467440000 | 2.6734000000  |
| C | 8.3903340000   | -5.8621810000 | 1.5590790000  |
| H | 8.8058590000   | -6.7501430000 | 2.1063270000  |
| H | 8.7446550000   | -4.9628390000 | 2.1108060000  |
| C | 6.1697790000   | -7.1086620000 | 1.0430260000  |
| H | 5.0822780000   | -7.0498180000 | 1.2797620000  |
| H | 6.5361270000   | -8.0318730000 | 1.5661480000  |
| C | -7.4342570000  | -3.7394900000 | -0.3531940000 |
| H | -6.4370920000  | -4.1333040000 | -0.6692590000 |
| C | -9.3308140000  | -2.1908630000 | -1.2750140000 |
| H | -10.1745010000 | -2.9112590000 | -1.3520590000 |
| H | -9.5146010000  | -1.4522280000 | -2.0925060000 |
| C | -8.2850260000  | -4.9696150000 | 0.0480520000  |
| H | -8.4318230000  | -5.6743720000 | -0.8125140000 |
| H | -7.6994320000  | -5.5290620000 | 0.8112900000  |
| C | -9.6735540000  | -4.6450020000 | 0.6539860000  |
| H | -10.0909600000 | -5.5663300000 | 1.1297610000  |
| H | -10.3881650000 | -4.4013010000 | -0.1635610000 |
| C | -7.9993380000  | -2.9352320000 | -1.5482070000 |
| H | -7.2328710000  | -2.1828910000 | -1.8447410000 |
| H | -8.1421110000  | -3.5819920000 | -2.4534640000 |
| B | -7.2747060000  | -2.7601030000 | 0.9746830000  |
| F | -6.7996960000  | -3.5655550000 | 2.1135140000  |
| C | -8.8271390000  | -2.2579100000 | 1.2908040000  |

|   |                |               |              |
|---|----------------|---------------|--------------|
| H | -8.8292080000  | -1.5669400000 | 2.1711510000 |
| C | -9.6654050000  | -3.4952940000 | 1.6919290000 |
| H | -10.7289190000 | -3.2226470000 | 1.9269040000 |
| H | -9.2280520000  | -3.8885350000 | 2.6369080000 |
| C | -9.4030520000  | -1.4657090000 | 0.0931440000 |
| H | -8.8357590000  | -0.5099190000 | 0.0119830000 |
| H | -10.4687820000 | -1.1609560000 | 0.2709820000 |

### 12.13. H-BBN

Charge = 0 Multiplicity = 1

|   |              |               |               |
|---|--------------|---------------|---------------|
| H | 0.4435980000 | 0.0554540000  | -0.0586360000 |
| B | 1.6652350000 | 0.0374300000  | -0.0378100000 |
| C | 2.5237510000 | -1.2842380000 | 0.0370640000  |
| H | 1.9048540000 | -2.2072270000 | 0.0596060000  |
| C | 3.4049920000 | -1.3380350000 | -1.2519330000 |
| H | 4.0818610000 | -2.2225040000 | -1.2063610000 |
| H | 2.7292670000 | -1.5284760000 | -2.1176560000 |
| C | 4.2323230000 | -0.0654070000 | -1.5404980000 |
| H | 4.6214910000 | -0.1153710000 | -2.5814890000 |
| H | 5.1350880000 | -0.0520660000 | -0.8965380000 |
| C | 3.4447540000 | 1.2517780000  | -1.3613400000 |
| H | 4.1484730000 | 2.1157780000  | -1.3896140000 |
| H | 2.7740860000 | 1.3891660000  | -2.2409280000 |
| C | 2.5639310000 | 1.3338300000  | -0.0735730000 |
| H | 1.9735000000 | 2.2738750000  | -0.1297670000 |
| C | 3.3707650000 | 1.3638510000  | 1.2647570000  |
| H | 4.0734480000 | 2.2291320000  | 1.2585380000  |
| H | 2.6521440000 | 1.5738020000  | 2.0905210000  |
| C | 4.1441330000 | 0.0686240000  | 1.5991230000  |
| H | 4.4742160000 | 0.1084120000  | 2.6607620000  |
| H | 5.0815870000 | 0.0292790000  | 1.0079720000  |
| C | 3.3310790000 | -1.2259240000 | 1.3741830000  |
| H | 2.6074610000 | -1.3434310000 | 2.2137950000  |
| H | 4.0069630000 | -2.1097330000 | 1.4418240000  |

### 12.14. [H-FBBN]<sup>-</sup>

Charge = -1 Multiplicity = 1

|   |               |               |               |
|---|---------------|---------------|---------------|
| H | -2.4984360000 | 0.0000000000  | -2.5854480000 |
| C | -4.4713860000 | -1.3083610000 | -2.1089430000 |
| H | -3.9023120000 | -2.2549780000 | -1.9323260000 |
| C | -5.5676860000 | 0.0000000000  | -4.0856510000 |
| H | -6.6326480000 | 0.0000000000  | -3.7640560000 |
| H | -5.6082140000 | 0.0000000000  | -5.2022240000 |
| C | -5.6484870000 | -1.3012680000 | -1.1039000000 |
| H | -6.3443390000 | -2.1686170000 | -1.2570450000 |
| H | -5.2031760000 | -1.4396650000 | -0.0917430000 |
| C | -6.4879300000 | 0.0000000000  | -1.0812760000 |
| H | -7.1422200000 | 0.0000000000  | -0.1753310000 |
| H | -7.1954530000 | 0.0000000000  | -1.9397770000 |
| C | -4.8851640000 | -1.3025830000 | -3.5983760000 |
| H | -3.9554670000 | -1.4487610000 | -4.1975980000 |
| H | -5.5538200000 | -2.1666530000 | -3.8558620000 |
| B | -3.5058940000 | 0.0000000000  | -1.8124220000 |
| F | -3.0512190000 | 0.0000000000  | -0.4232250000 |
| C | -4.4713860000 | 1.3083610000  | -2.1089430000 |
| H | -3.9023120000 | 2.2549780000  | -1.9323260000 |

|   |               |              |               |
|---|---------------|--------------|---------------|
| C | -5.6484870000 | 1.3012680000 | -1.1039000000 |
| H | -6.3443390000 | 2.1686170000 | -1.2570450000 |
| H | -5.2031760000 | 1.4396650000 | -0.0917430000 |
| C | -4.8851640000 | 1.3025830000 | -3.5983760000 |
| H | -3.9554670000 | 1.4487610000 | -4.1975980000 |
| H | -5.5538200000 | 2.1666530000 | -3.8558620000 |

## 12.15. (H-BBN)<sub>2</sub>

Charge = 0 Multiplicity = 1

|   |               |               |               |
|---|---------------|---------------|---------------|
| C | -0.8112350000 | -1.3176790000 | -0.6067410000 |
| H | -1.3844660000 | -2.2531000000 | -0.7864320000 |
| C | 0.2779860000  | 0.0000000000  | 1.3824300000  |
| H | 1.3428800000  | 0.0000000000  | 1.0719770000  |
| H | 0.3037770000  | 0.0000000000  | 2.4946490000  |
| C | 0.3823380000  | -1.3014130000 | -1.6060590000 |
| H | 1.0565550000  | -2.1670970000 | -1.4117290000 |
| H | -0.0302250000 | -1.4700490000 | -2.6279670000 |
| C | 1.2186000000  | 0.0000000000  | -1.6181730000 |
| H | 1.8746660000  | 0.0000000000  | -2.5166580000 |
| H | 1.9157540000  | 0.0000000000  | -0.7554040000 |
| C | -0.4017180000 | -1.3014130000 | 0.8951110000  |
| H | -1.3238210000 | -1.4700520000 | 1.4986210000  |
| H | 0.2627820000  | -2.1670990000 | 1.1204310000  |
| B | -1.6724710000 | 0.0000000000  | -0.8767340000 |
| H | -2.2412140000 | 0.0000000000  | -2.0962520000 |
| C | -4.2655170000 | -1.3176780000 | -1.6892580000 |
| H | -3.6922860000 | -2.2531000000 | -1.5095670000 |
| C | -5.3547300000 | 0.0000000000  | -3.6784360000 |
| H | -6.4196280000 | 0.0000000000  | -3.3679940000 |
| H | -5.3805110000 | 0.0000000000  | -4.7906550000 |
| C | -5.4590900000 | -1.3014140000 | -0.6899410000 |
| H | -6.1333080000 | -2.1670970000 | -0.8842720000 |
| H | -5.0465260000 | -1.4700520000 | 0.3319670000  |
| C | -6.2953520000 | 0.0000000000  | -0.6778210000 |
| H | -6.9514130000 | 0.0000000000  | 0.2206670000  |
| H | -6.9925100000 | 0.0000000000  | -1.5405870000 |
| C | -4.6750310000 | -1.3014140000 | -3.1911110000 |
| H | -3.7529270000 | -1.4700560000 | -3.7946190000 |
| H | -5.3395320000 | -2.1670990000 | -3.4164320000 |
| B | -3.4042810000 | 0.0000000000  | -1.4192660000 |
| H | -2.8355390000 | 0.0000000000  | -0.1997470000 |
| C | -4.2655170000 | 1.3176780000  | -1.6892580000 |
| H | -3.6922860000 | 2.2531000000  | -1.5095670000 |
| C | -5.4590900000 | 1.3014140000  | -0.6899410000 |
| H | -6.1333080000 | 2.1670970000  | -0.8842720000 |
| H | -5.0465260000 | 1.4700520000  | 0.3319670000  |
| C | -4.6750310000 | 1.3014140000  | -3.1911110000 |
| H | -3.7529270000 | 1.4700560000  | -3.7946190000 |
| H | -5.3395320000 | 2.1670990000  | -3.4164320000 |
| C | -0.8112350000 | 1.3176790000  | -0.6067410000 |
| H | -1.3844660000 | 2.2531000000  | -0.7864320000 |
| C | 0.2779860000  | 1.3014130000  | -1.6060590000 |
| H | 1.0565550000  | 2.1670970000  | -1.4117290000 |
| H | -0.0302250000 | 1.4700490000  | -2.6279670000 |
| C | -0.4017180000 | 1.3014130000  | 0.8951110000  |
| H | -1.3238210000 | 1.4700520000  | 1.4986210000  |
| H | 0.2627820000  | 2.1670990000  | 1.1204310000  |



### 12.16. ClSiMe<sub>2</sub>CH<sub>2</sub>CH<sub>2</sub>(9-BBN) (3)

Charge = 0 Multiplicity = 1

|    |               |               |               |
|----|---------------|---------------|---------------|
| Si | -0.8165770000 | -2.1082890000 | 1.2911930000  |
| C  | -0.7799610000 | -1.8515180000 | 3.1619890000  |
| C  | -0.9418070000 | -3.9426590000 | 0.8589410000  |
| C  | -2.1763620000 | -1.0858020000 | 0.4544220000  |
| H  | -1.8862030000 | -4.3784840000 | 1.2497210000  |
| H  | -0.0963380000 | -4.5105870000 | 1.2994430000  |
| H  | -0.9197460000 | -4.0954610000 | -0.2399900000 |
| H  | -1.7180390000 | -2.2172890000 | 3.6319700000  |
| H  | -0.6631560000 | -0.7772960000 | 3.4145610000  |
| H  | 0.0675760000  | -2.4034590000 | 3.6185540000  |
| H  | -1.9687530000 | -0.0138540000 | 0.6714230000  |
| C  | -3.6269020000 | -1.4471360000 | 0.8501980000  |
| H  | -2.0373620000 | -1.1878370000 | -0.6455860000 |
| H  | -3.7739300000 | -1.3607310000 | 1.9571400000  |
| H  | -3.8390180000 | -2.5298510000 | 0.6664830000  |
| B  | -4.8257900000 | -0.6364840000 | 0.2086860000  |
| C  | -6.3434440000 | -0.9966480000 | 0.5028160000  |
| H  | -6.4513290000 | -1.8520970000 | 1.2076740000  |
| C  | -7.0133900000 | 0.2451050000  | 1.1663890000  |
| H  | -8.0999110000 | 0.0519700000  | 1.3240340000  |
| H  | -6.5827950000 | 0.3560350000  | 2.1887560000  |
| C  | -6.8310450000 | 1.5781000000  | 0.4070190000  |
| H  | -7.1234900000 | 2.4188490000  | 1.0743110000  |
| H  | -7.5428980000 | 1.6250550000  | -0.4420190000 |
| C  | -5.3933530000 | 1.8190770000  | -0.1056890000 |
| H  | -5.3880570000 | 2.6877570000  | -0.8041730000 |
| H  | -4.7551630000 | 2.1290410000  | 0.7541290000  |
| C  | -4.7109000000 | 0.5909030000  | -0.7849000000 |
| H  | -3.6584310000 | 0.8742440000  | -1.0059250000 |
| C  | -5.3645960000 | 0.1473970000  | -2.1329450000 |
| H  | -5.3621390000 | 1.0006220000  | -2.8502600000 |
| H  | -4.7057610000 | -0.6252630000 | -2.5930610000 |
| C  | -6.7944300000 | -0.4268960000 | -2.0166420000 |
| H  | -7.0646510000 | -0.9248060000 | -2.9740770000 |
| H  | -7.5222190000 | 0.4025300000  | -1.9079250000 |
| C  | -6.9748030000 | -1.4316140000 | -0.8570910000 |
| H  | -6.5133290000 | -2.4029980000 | -1.1514740000 |
| H  | -8.0588370000 | -1.6508860000 | -0.7180010000 |
| Cl | 1.0313420000  | -1.4097380000 | 0.5279080000  |

### 12.17. [ClSiMe<sub>2</sub>CH<sub>2</sub>CH<sub>2</sub>F(9-BBN)]<sup>-</sup>

Charge = -1 Multiplicity = 1

|    |               |               |               |
|----|---------------|---------------|---------------|
| Cl | -0.9163420000 | -1.0911260000 | 1.0942890000  |
| Si | 1.0553650000  | -0.7889770000 | 1.9034200000  |
| C  | 2.3221540000  | -0.6500040000 | 0.5293090000  |
| C  | 1.3511630000  | -2.2850370000 | 3.0304190000  |
| C  | 0.9091130000  | 0.7827650000  | 2.9572330000  |
| H  | 2.3157150000  | -1.5947590000 | -0.0608730000 |
| C  | 3.7633930000  | -0.3892210000 | 1.0458370000  |
| H  | 2.0033070000  | 0.1461690000  | -0.1815970000 |
| H  | 0.6401790000  | 1.6548440000  | 2.3251810000  |
| H  | 1.8811700000  | 1.0043080000  | 3.4469340000  |
| H  | 0.1338380000  | 0.6728030000  | 3.7442500000  |
| H  | 1.3711640000  | -3.2208600000 | 2.4339340000  |
| H  | 0.5562880000  | -2.3772280000 | 3.7997840000  |

|   |              |               |               |
|---|--------------|---------------|---------------|
| H | 2.3316320000 | -2.1899350000 | 3.5430740000  |
| H | 3.9984720000 | -1.1066240000 | 1.8720940000  |
| H | 3.8155890000 | 0.6241110000  | 1.5096850000  |
| C | 6.4595910000 | -0.5475610000 | 0.4578550000  |
| H | 6.5728800000 | -1.2527040000 | 1.3194900000  |
| C | 6.5238530000 | 2.0220640000  | -0.0151690000 |
| H | 7.3802030000 | 2.0783840000  | -0.7211470000 |
| H | 6.5371080000 | 2.9978240000  | 0.5274990000  |
| C | 7.4255780000 | -1.0358280000 | -0.6493130000 |
| H | 8.4944510000 | -1.0036030000 | -0.3122350000 |
| H | 7.1915350000 | -2.1082580000 | -0.8328980000 |
| C | 7.3147500000 | -0.2807800000 | -1.9977600000 |
| H | 7.8485110000 | -0.8620820000 | -2.7876560000 |
| H | 7.8726030000 | 0.6793350000  | -1.9309800000 |
| C | 6.7706700000 | 0.8712760000  | 0.9923010000  |
| H | 6.1313430000 | 1.0477000000  | 1.8889290000  |
| H | 7.8256560000 | 0.9510610000  | 1.3633720000  |
| B | 4.9151590000 | -0.6189830000 | -0.1306970000 |
| F | 4.6660230000 | -1.9646440000 | -0.6816180000 |
| C | 4.8931550000 | 0.4857070000  | -1.3626370000 |
| H | 3.8794460000 | 0.5350130000  | -1.8328250000 |
| C | 5.8635720000 | -0.0056370000 | -2.4657340000 |
| H | 5.9002650000 | 0.7048530000  | -3.3320130000 |
| H | 5.4436490000 | -0.9564880000 | -2.8627450000 |
| C | 5.2073370000 | 1.9016570000  | -0.8222810000 |
| H | 4.3638020000 | 2.2087800000  | -0.1607570000 |
| H | 5.2296600000 | 2.6626830000  | -1.6449530000 |

### 13. References

1. M. Cicač-Hudi, J. Bender, S. H. Schlindwein, M. Bispinghoff, M. Nieger, H. Grützmacher and D. Gudat, *Eur. J. Inorg. Chem.*, 2016, **2016**, 649–658.
2. G. M. Sheldrick, *Acta. Cryst.*, 2015, **A71**, 3–8.
3. O. V. Dolomanov, L. J. Bourhis, R. J. Gildea, J. A. K. Howard and H. Puschmann, *J. Appl. Cryst.*, 2009, **42**, 339–341.
4. W. Kohn and L. J. Sham, *Phys. Rev.*, 1965, **140**, A1133–6A1138.
5. P. Hohenberg and W. Kohn, *Phys. Rev.*, 1964, **136**, B864–6B871.
6. C. Peng, P. Y. Ayala, H. B. Schlegel and M. J. Frisch, *J. Comp. Chem.*, 1996, **17**, 49–656.
7. C. Peng and H. Bernhard Schlegel, *Isr. J. Chem.*, 1993, **33**, 449–6454.
8. R. A. Gaussian 09, M. J. Frisch, G. W. Trucks, H. B. Schlegel, G. E. Scuseria, M. A. Robb, J. R. Cheeseman, G. Scalmani, V. Barone, G. A. Petersson, H. Nakatsuji, X. Li, M. Caricato, A. Marenich, J. Bloino, B. G. Janesko, R. Gomperts, B. Mennucci, H. P. Hratchian, J. V. Ortiz, A. F. Izmaylov, J. L. Sonnenberg, D. Williams-Young, F. Ding, F. Lipparini, F. Egidi, J. Goings, B. Peng, A. Petrone, T. Henderson, D. Ranasinghe, V. G. Zakrzewski, J. Gao, N. Rega, G. Zheng, W. Liang, M. Hada, M. Ehara, K. Toyota, R. Fukuda, J. Hasegawa, M. Ishida, T. Nakajima, Y. Honda, O. Kitao, H. Nakai, T. Vreven, K. Throssell, J. A. Montgomery, Jr., J. E. Peralta, F. Ogliaro, M. Bearpark, J. J. Heyd, E. Brothers, K. N. Kudin, V. N. Staroverov, T. Keith, R. Kobayashi, J. Normand, K. Raghavachari, A. Rendell, J. C. Burant, S. S. Iyengar, J. Tomasi, M. Cossi, J. M. Millam, M. Klene, C. Adamo, R. Cammi, J. W. Ochterski, R. L. Martin, K. Morokuma, O. Farkas, J. B. Foresman, and D. J. Fox, Gaussian, Inc., Wallingford CT, 2016.
9. I. B. Sivaev and V. I. Bregadze, *Coord. Chem. Rev.*, 2014, **270–271**, 75–88.

10. K. Christe, D. Dixon, D. McLemore, W. Wilson, J. Sheehy and J. Boatz, *J. Fluor. Chem.*, 2000, **101**, 151–153.
11. P. Erdmann, J. Leitner, J. Schwarz and L. Greb, *ChemPhysChem*, 2020, **21**, 987–994.
12. A. Ramos, A. Antiñolo, F. Carrillo-Hermosilla, R. Fernández-Galán and D. García-Vivó, *Chem. Commun.*, 2019, **55**, 3073–3076.
13. M. Khononov, N. Fridman, M. Tamm and M. S. Eisen, *Eur. J. Org. Chem.*, 2020, **2020**, 3153–63160.
14. R. K. Sahoo, N. Sarkar and S. Nembenna, *Angew. Chem. Int. Ed.*, 2021, **60**, 11991–12000.
15. Y. Wu, C. Shan, J. Ying, J. Su, J. Zhu, L. L. Liu and Y. Zhao, *Green Chem.*, 2017, **19**, 4169–4175.
16. A. K. Jaladi, W. K. Shin and D. K. An, *RSC Adv.*, 2019, **9**, 26483–26486.
17. J. Bhattacharjee, A. Harinath, K. Bano and T. K. Panda, *ACS Omega*, 2020, **5**, 1595–1606.
18. W. Liu, Y. Ding, D. Jin, Q. Shen, B. Yan, X. Ma and Z. Yang, *Green Chem.*, 2019, **21**, 3812–3815.
19. X. Wang and X. Xu, *RSC Adv.*, 2021, **11**, 1128–1133.
20. B. van IJzendoorn, I. Vitorica-Yrezabal, G. Whitehead and M. Mehta, *Chem. Eur. J.*, 2021, **28**, e202103737.
21. C. R. Davis, I. K. Luvaga and J. M. Ready, *J. Am. Chem. Soc.*, 2021, **143**, 4921–4927.
22. T. Ohmura, Y. Yamamoto and N. Miyaoura, *J. Am. Chem. Soc.*, 2000, **122**, 4990–4991.
23. A. D. Bage, K. Nicholson, T. A. Hunt, T. Langer and S. P. Thomas, *ACS Catal.*, 2020, **10**, 13479–13486.
